# Supplementary material for: Ratio-Driven Lipoprotein Mapping Refines Genetic Pathways of Cardiometabolic Risk
Source: Research Square preprint supplement (doi:10.21203/rs.3.rs-8475327/v1), 2026-01-07
Supplement: Supplementary file 1 [file 27be6cf3bdbba0f399a593b7.xlsx]

## Sheet: legend
Supplementary Tables for "Suhre et al., Ratio-Driven Lipoprotein Mapping Refines Genetic Pathways of Cardiometabolic Risk "
Table	Content
ST1	List and annotation of the 168 NMR traits
ST2	List of 81 ratios proposed by Nightingale (NightRatios)
ST3	Lead association data for all computed models (based on 2,624 entries of ST3 by Graham et al.), incl. replication in non-Caucasians
ST4	Scaled -log10(p-value) for 446 genetic loci and 168 traits
ST5	Scaled effect sizes (beta) for 446 genetic loci and 168 traits
ST6	208 ratios x 347 variants (unique ratios that were strongest association in at least one association)
ST7	Summary statistics for all 208 ratios x 347 variants associations with log10(p-gain) > 11.2
ST8	71 ratios x 84 LPmtr loci
ST9	18 key ratios x 84 LPmtr loci
ST10	Associations of ratios related to Total.Esterified.Cholesterol / Total.Cholesterol for 347 loci
ST11	Associations of ratios related to Concentration.of.HDL.Particles / Total.Concentration.of.Lipoprotein.Particles for 347 loci
ST12	Association of lipid particle composition with LPmtr genes
ST13	Overlapping UKB-PPP pQTLs (from Sun et al., Nature, 2023)
ST14	Count of overlapping associations with LPmtr genes that are on the OLINK panel
ST15	Selected summary statistics for NMR trait associations discussed in the paper

## Sheet: ST1
List and annotation of the 168 NMR traits
name	field_id	title	units	Group	Subgroup	MergedSubgroup	MyGroup	AltAnno	AltAnno2
Total.Cholesterol	23400	Total Cholesterol	mmol/l	Cholesterol	NA	Cholesterol	OTHER	Cholesterol	Cholesterol
Total.Cholesterol.Minus.HDL.C	23401	Total Cholesterol Minus HDL-C	mmol/l	Cholesterol	NA	Cholesterol	OTHER	Cholesterol	Cholesterol
Remnant.Cholesterol..Non.HDL..Non.LDL..Cholesterol.	23402	Remnant Cholesterol (Non-HDL, Non-LDL -Cholesterol)	mmol/l	Cholesterol	NA	Cholesterol	OTHER	Cholesterol	Cholesterol
VLDL.Cholesterol	23403	VLDL Cholesterol	mmol/l	Cholesterol	NA	Cholesterol	VLDL	Cholesterol	Cholesterol
Clinical.LDL.Cholesterol	23404	Clinical LDL Cholesterol	mmol/l	Cholesterol	NA	Cholesterol	LDL	Cholesterol	Cholesterol
LDL.Cholesterol	23405	LDL Cholesterol	mmol/l	Cholesterol	NA	Cholesterol	LDL	Cholesterol	Cholesterol
HDL.Cholesterol	23406	HDL Cholesterol	mmol/l	Cholesterol	NA	Cholesterol	HDL	Cholesterol	Cholesterol
Total.Triglycerides	23407	Total Triglycerides	mmol/l	Triglycerides	NA	Triglycerides	OTHER	Triglycerides	Triglycerides
Triglycerides.in.VLDL	23408	Triglycerides in VLDL	mmol/l	Triglycerides	NA	Triglycerides	VLDL	Triglycerides	Triglycerides
Triglycerides.in.LDL	23409	Triglycerides in LDL	mmol/l	Triglycerides	NA	Triglycerides	LDL	Triglycerides	Triglycerides
Triglycerides.in.HDL	23410	Triglycerides in HDL	mmol/l	Triglycerides	NA	Triglycerides	HDL	Triglycerides	Triglycerides
Total.Phospholipids.in.Lipoprotein.Particles	23411	Total Phospholipids in Lipoprotein Particles	mmol/l	Phospholipids	NA	Phospholipids	OTHER	Phospholipids	Phospholipids
Phospholipids.in.VLDL	23412	Phospholipids in VLDL	mmol/l	Phospholipids	NA	Phospholipids	VLDL	Phospholipids	Phospholipids
Phospholipids.in.LDL	23413	Phospholipids in LDL	mmol/l	Phospholipids	NA	Phospholipids	LDL	Phospholipids	Phospholipids
Phospholipids.in.HDL	23414	Phospholipids in HDL	mmol/l	Phospholipids	NA	Phospholipids	HDL	Phospholipids	Phospholipids
Total.Esterified.Cholesterol	23415	Total Esterified Cholesterol	mmol/l	Cholesteryl esters	NA	Cholesteryl esters	OTHER	Cholesteryl Esters	Cholesteryl esters
Cholesteryl.Esters.in.VLDL	23416	Cholesteryl Esters in VLDL	mmol/l	Cholesteryl esters	NA	Cholesteryl esters	VLDL	Cholesteryl Esters	Cholesteryl Esters
Cholesteryl.Esters.in.LDL	23417	Cholesteryl Esters in LDL	mmol/l	Cholesteryl esters	NA	Cholesteryl esters	LDL	Cholesteryl Esters	Cholesteryl Esters
Cholesteryl.Esters.in.HDL	23418	Cholesteryl Esters in HDL	mmol/l	Cholesteryl esters	NA	Cholesteryl esters	HDL	Cholesteryl Esters	Cholesteryl Esters
Total.Free.Cholesterol	23419	Total Free Cholesterol	mmol/l	Free cholesterol	NA	Free cholesterol	OTHER	Free Cholesterol	Free Cholesterol
Free.Cholesterol.in.VLDL	23420	Free Cholesterol in VLDL	mmol/l	Free cholesterol	NA	Free cholesterol	VLDL	Free Cholesterol	Free Cholesterol
Free.Cholesterol.in.LDL	23421	Free Cholesterol in LDL	mmol/l	Free cholesterol	NA	Free cholesterol	LDL	Free Cholesterol	Free Cholesterol
Free.Cholesterol.in.HDL	23422	Free Cholesterol in HDL	mmol/l	Free cholesterol	NA	Free cholesterol	HDL	Free Cholesterol	Free Cholesterol
Total.Lipids.in.Lipoprotein.Particles	23423	Total Lipids in Lipoprotein Particles	mmol/l	Total lipids	NA	Total lipids	OTHER	Lipids	Lipids
Total.Lipids.in.VLDL	23424	Total Lipids in VLDL	mmol/l	Total lipids	NA	Total lipids	VLDL	Lipids	Lipids
Total.Lipids.in.LDL	23425	Total Lipids in LDL	mmol/l	Total lipids	NA	Total lipids	LDL	Lipids	Lipids
Total.Lipids.in.HDL	23426	Total Lipids in HDL	mmol/l	Total lipids	NA	Total lipids	HDL	Lipids	Lipids
Total.Concentration.of.Lipoprotein.Particles	23427	Total Concentration of Lipoprotein Particles	mmol/l	Lipoprotein particle concentrations	NA	Lipoprotein particle conc.	OTHER	Lipoprotein particle concentrations	Lipoprotein particle concentrations
Concentration.of.VLDL.Particles	23428	Concentration of VLDL Particles	mmol/l	Lipoprotein particle concentrations	NA	Lipoprotein particle conc.	VLDL	Lipoprotein particle concentrations	Lipoprotein particle concentrations
Concentration.of.LDL.Particles	23429	Concentration of LDL Particles	mmol/l	Lipoprotein particle concentrations	NA	Lipoprotein particle conc.	LDL	Lipoprotein particle concentrations	Lipoprotein particle concentrations
Concentration.of.HDL.Particles	23430	Concentration of HDL Particles	mmol/l	Lipoprotein particle concentrations	NA	Lipoprotein particle conc.	HDL	Lipoprotein particle concentrations	Lipoprotein particle concentrations
Average.Diameter.for.VLDL.Particles	23431	Average Diameter for VLDL Particles	nm	Lipoprotein particle sizes	NA	Lipoprotein particle sizes	VLDL	Lipoprotein particle sizes	Lipoprotein particle sizes
Average.Diameter.for.LDL.Particles	23432	Average Diameter for LDL Particles	nm	Lipoprotein particle sizes	NA	Lipoprotein particle sizes	LDL	Lipoprotein particle sizes	Lipoprotein particle sizes
Average.Diameter.for.HDL.Particles	23433	Average Diameter for HDL Particles	nm	Lipoprotein particle sizes	NA	Lipoprotein particle sizes	HDL	Lipoprotein particle sizes	Lipoprotein particle sizes
Phosphoglycerides	23434	Phosphoglycerides	mmol/l	Other lipids	NA	Other lipids	OTHER	Phospholipids	Phospholipids
Total.Cholines	23436	Total Cholines	mmol/l	Other lipids	NA	Other lipids	OTHER	Phospholipids	Phospholipids
Phosphatidylcholines	23437	Phosphatidylcholines	mmol/l	Other lipids	NA	Other lipids	OTHER	Phospholipids	Phospholipids
Sphingomyelins	23438	Sphingomyelins	mmol/l	Other lipids	NA	Other lipids	OTHER	Phospholipids	Phospholipids
Apolipoprotein.B	23439	Apolipoprotein B	g/l	Apolipoproteins	NA	Apolipoproteins	OTHER	Proteins	Proteins
Apolipoprotein.A1	23440	Apolipoprotein A1	g/l	Apolipoproteins	NA	Apolipoproteins	OTHER	Proteins	Proteins
Total.Fatty.Acids	23442	Total Fatty Acids	mmol/l	Fatty acids	NA	Fatty acids	FA	Fatty Acids	Fatty Acids
Degree.of.Unsaturation	23443	Degree of Unsaturation	degree	Fatty acids	NA	Fatty acids	FA	Fatty Acids	Fatty Acids
Omega.3.Fatty.Acids	23444	Omega-3 Fatty Acids	mmol/l	Fatty acids	NA	Fatty acids	FA	Fatty Acids	Fatty Acids
Omega.6.Fatty.Acids	23445	Omega-6 Fatty Acids	mmol/l	Fatty acids	NA	Fatty acids	FA	Fatty Acids	Fatty Acids
Polyunsaturated.Fatty.Acids	23446	Polyunsaturated Fatty Acids	mmol/l	Fatty acids	NA	Fatty acids	FA	Fatty Acids	Fatty Acids
Monounsaturated.Fatty.Acids	23447	Monounsaturated Fatty Acids	mmol/l	Fatty acids	NA	Fatty acids	FA	Fatty Acids	Fatty Acids
Saturated.Fatty.Acids	23448	Saturated Fatty Acids	mmol/l	Fatty acids	NA	Fatty acids	FA	Fatty Acids	Fatty Acids
Linoleic.Acid	23449	Linoleic Acid	mmol/l	Fatty acids	NA	Fatty acids	FA	Fatty Acids	Fatty Acids
Docosahexaenoic.Acid	23450	Docosahexaenoic Acid	mmol/l	Fatty acids	NA	Fatty acids	FA	Fatty Acids	Fatty Acids
Alanine	23460	Alanine	mmol/l	Amino acids	NA	Amino acids - other	AA	Amino acids	Amino acids
Glutamine	23461	Glutamine	mmol/l	Amino acids	NA	Amino acids - other	AA	Amino acids	Amino acids
Glycine	23462	Glycine	mmol/l	Amino acids	NA	Amino acids - other	AA	Amino acids	Amino acids
Histidine	23463	Histidine	mmol/l	Amino acids	NA	Amino acids - other	AA	Amino acids	Amino acids
Total.Concentration.of.Branched.Chain.Amino.Acids..Leucine...Isoleucine...Valine.	23464	Total Concentration of Branched-Chain Amino Acids (Leucine + Isoleucine + Valine)	mmol/l	Amino acids	Branched-chain amino acids	Branched-chain amino acids	AA	Amino acids	Amino acids
Isoleucine	23465	Isoleucine	mmol/l	Amino acids	Branched-chain amino acids	Branched-chain amino acids	AA	Amino acids	Amino acids
Leucine	23466	Leucine	mmol/l	Amino acids	Branched-chain amino acids	Branched-chain amino acids	AA	Amino acids	Amino acids
Valine	23467	Valine	mmol/l	Amino acids	Branched-chain amino acids	Branched-chain amino acids	AA	Amino acids	Amino acids
Phenylalanine	23468	Phenylalanine	mmol/l	Amino acids	Aromatic amino acids	Aromatic amino acids	AA	Amino acids	Amino acids
Tyrosine	23469	Tyrosine	mmol/l	Amino acids	Aromatic amino acids	Aromatic amino acids	AA	Amino acids	Amino acids
Glucose	23470	Glucose	mmol/l	Glycolysis related metabolites	NA	Glycolysis related	OTHER	Other Metabolites	Other Metabolites
Lactate	23471	Lactate	mmol/l	Glycolysis related metabolites	NA	Glycolysis related metabolites	OTHER	Other Metabolites	Other Metabolites
Pyruvate	23472	Pyruvate	mmol/l	Glycolysis related metabolites	NA	Glycolysis related metabolites	OTHER	Other Metabolites	Other Metabolites
Citrate	23473	Citrate	mmol/l	Glycolysis related metabolites	NA	Glycolysis related metabolites	OTHER	Other Metabolites	Other Metabolites
X3.Hydroxybutyrate	23474	3-Hydroxybutyrate	mmol/l	Ketone bodies	NA	Ketone bodies	OTHER	Other Metabolites	Other Metabolites
Acetate	23475	Acetate	mmol/l	Ketone bodies	NA	Ketone bodies	OTHER	Other Metabolites	Other Metabolites
Acetoacetate	23476	Acetoacetate	mmol/l	Ketone bodies	NA	Ketone bodies	OTHER	Other Metabolites	Other Metabolites
Acetone	23477	Acetone	mmol/l	Ketone bodies	NA	Ketone bodies	OTHER	Other Metabolites	Other Metabolites
Creatinine	23478	Creatinine	mmol/l	Fluid balance	NA	Fluid balance	OTHER	Other Metabolites	Other Metabolites
Albumin	23479	Albumin	g/l	Fluid balance	NA	Fluid balance	OTHER	Proteins	Proteins
Glycoprotein.Acetyls	23480	Glycoprotein Acetyls	mmol/l	Inflammation	NA	Inflammation	OTHER	Other Metabolites	Other Metabolites
Concentration.of.Chylomicrons.and.Extremely.Large.VLDL.Particles	23481	Concentration of Chylomicrons and Extremely Large VLDL Particles	mmol/l	Lipoprotein subclasses	Chylomicrons and extremely large VLDL (particle diameters from 75 nm upwards)	Chylomicrons and x-large VLDL	VLDL	Lipoprotein concentrations	Chylomicrons and extremely large VLDL
Total.Lipids.in.Chylomicrons.and.Extremely.Large.VLDL	23482	Total Lipids in Chylomicrons and Extremely Large VLDL	mmol/l	Lipoprotein subclasses	Chylomicrons and extremely large VLDL (particle diameters from 75 nm upwards)	Chylomicrons and x-large VLDL	VLDL	Lipids	Chylomicrons and extremely large VLDL
Phospholipids.in.Chylomicrons.and.Extremely.Large.VLDL	23483	Phospholipids in Chylomicrons and Extremely Large VLDL	mmol/l	Lipoprotein subclasses	Chylomicrons and extremely large VLDL (particle diameters from 75 nm upwards)	Chylomicrons and x-large VLDL	VLDL	Phospholipids	Chylomicrons and extremely large VLDL
Cholesterol.in.Chylomicrons.and.Extremely.Large.VLDL	23484	Cholesterol in Chylomicrons and Extremely Large VLDL	mmol/l	Lipoprotein subclasses	Chylomicrons and extremely large VLDL (particle diameters from 75 nm upwards)	Chylomicrons and x-large VLDL	VLDL	Cholesterol	Chylomicrons and extremely large VLDL
Cholesteryl.Esters.in.Chylomicrons.and.Extremely.Large.VLDL	23485	Cholesteryl Esters in Chylomicrons and Extremely Large VLDL	mmol/l	Lipoprotein subclasses	Chylomicrons and extremely large VLDL (particle diameters from 75 nm upwards)	Chylomicrons and x-large VLDL	VLDL	Cholesteryl Esters	Chylomicrons and extremely large VLDL
Free.Cholesterol.in.Chylomicrons.and.Extremely.Large.VLDL	23486	Free Cholesterol in Chylomicrons and Extremely Large VLDL	mmol/l	Lipoprotein subclasses	Chylomicrons and extremely large VLDL (particle diameters from 75 nm upwards)	Chylomicrons and x-large VLDL	VLDL	Free Cholesterol	Chylomicrons and extremely large VLDL
Triglycerides.in.Chylomicrons.and.Extremely.Large.VLDL	23487	Triglycerides in Chylomicrons and Extremely Large VLDL	mmol/l	Lipoprotein subclasses	Chylomicrons and extremely large VLDL (particle diameters from 75 nm upwards)	Chylomicrons and x-large VLDL	VLDL	Triglycerides	Chylomicrons and extremely large VLDL
Concentration.of.Very.Large.VLDL.Particles	23488	Concentration of Very Large VLDL Particles	mmol/l	Lipoprotein subclasses	Very large VLDL (average diameter 64 nm)	Very large VLDL	VLDL	Lipoprotein concentrations	Very large VLDL
Total.Lipids.in.Very.Large.VLDL	23489	Total Lipids in Very Large VLDL	mmol/l	Lipoprotein subclasses	Very large VLDL (average diameter 64 nm)	Very large VLDL	VLDL	Lipids	Very large VLDL
Phospholipids.in.Very.Large.VLDL	23490	Phospholipids in Very Large VLDL	mmol/l	Lipoprotein subclasses	Very large VLDL (average diameter 64 nm)	Very large VLDL	VLDL	Phospholipids	Very large VLDL
Cholesterol.in.Very.Large.VLDL	23491	Cholesterol in Very Large VLDL	mmol/l	Lipoprotein subclasses	Very large VLDL (average diameter 64 nm)	Very large VLDL	VLDL	Cholesterol	Very large VLDL
Cholesteryl.Esters.in.Very.Large.VLDL	23492	Cholesteryl Esters in Very Large VLDL	mmol/l	Lipoprotein subclasses	Very large VLDL (average diameter 64 nm)	Very large VLDL	VLDL	Cholesteryl Esters	Very large VLDL
Free.Cholesterol.in.Very.Large.VLDL	23493	Free Cholesterol in Very Large VLDL	mmol/l	Lipoprotein subclasses	Very large VLDL (average diameter 64 nm)	Very large VLDL	VLDL	Free Cholesterol	Very large VLDL
Triglycerides.in.Very.Large.VLDL	23494	Triglycerides in Very Large VLDL	mmol/l	Lipoprotein subclasses	Very large VLDL (average diameter 64 nm)	Very large VLDL	VLDL	Triglycerides	Very large VLDL
Concentration.of.Large.VLDL.Particles	23495	Concentration of Large VLDL Particles	mmol/l	Lipoprotein subclasses	Large VLDL (average diameter 53.6 nm)	Large VLDL	VLDL	Lipoprotein concentrations	Large VLDL
Total.Lipids.in.Large.VLDL	23496	Total Lipids in Large VLDL	mmol/l	Lipoprotein subclasses	Large VLDL (average diameter 53.6 nm)	Large VLDL	VLDL	Lipids	Large VLDL
Phospholipids.in.Large.VLDL	23497	Phospholipids in Large VLDL	mmol/l	Lipoprotein subclasses	Large VLDL (average diameter 53.6 nm)	Large VLDL	VLDL	Phospholipids	Large VLDL
Cholesterol.in.Large.VLDL	23498	Cholesterol in Large VLDL	mmol/l	Lipoprotein subclasses	Large VLDL (average diameter 53.6 nm)	Large VLDL	VLDL	Cholesterol	Large VLDL
Cholesteryl.Esters.in.Large.VLDL	23499	Cholesteryl Esters in Large VLDL	mmol/l	Lipoprotein subclasses	Large VLDL (average diameter 53.6 nm)	Large VLDL	VLDL	Cholesteryl Esters	Large VLDL
Free.Cholesterol.in.Large.VLDL	23500	Free Cholesterol in Large VLDL	mmol/l	Lipoprotein subclasses	Large VLDL (average diameter 53.6 nm)	Large VLDL	VLDL	Free Cholesterol	Large VLDL
Triglycerides.in.Large.VLDL	23501	Triglycerides in Large VLDL	mmol/l	Lipoprotein subclasses	Large VLDL (average diameter 53.6 nm)	Large VLDL	VLDL	Triglycerides	Large VLDL
Concentration.of.Medium.VLDL.Particles	23502	Concentration of Medium VLDL Particles	mmol/l	Lipoprotein subclasses	Medium VLDL (average diameter 44.5 nm)	Medium VLDL	VLDL	Lipoprotein concentrations	Medium VLDL
Total.Lipids.in.Medium.VLDL	23503	Total Lipids in Medium VLDL	mmol/l	Lipoprotein subclasses	Medium VLDL (average diameter 44.5 nm)	Medium VLDL	VLDL	Lipids	Medium VLDL
Phospholipids.in.Medium.VLDL	23504	Phospholipids in Medium VLDL	mmol/l	Lipoprotein subclasses	Medium VLDL (average diameter 44.5 nm)	Medium VLDL	VLDL	Phospholipids	Medium VLDL
Cholesterol.in.Medium.VLDL	23505	Cholesterol in Medium VLDL	mmol/l	Lipoprotein subclasses	Medium VLDL (average diameter 44.5 nm)	Medium VLDL	VLDL	Cholesterol	Medium VLDL
Cholesteryl.Esters.in.Medium.VLDL	23506	Cholesteryl Esters in Medium VLDL	mmol/l	Lipoprotein subclasses	Medium VLDL (average diameter 44.5 nm)	Medium VLDL	VLDL	Cholesteryl Esters	Medium VLDL
Free.Cholesterol.in.Medium.VLDL	23507	Free Cholesterol in Medium VLDL	mmol/l	Lipoprotein subclasses	Medium VLDL (average diameter 44.5 nm)	Medium VLDL	VLDL	Free Cholesterol	Medium VLDL
Triglycerides.in.Medium.VLDL	23508	Triglycerides in Medium VLDL	mmol/l	Lipoprotein subclasses	Medium VLDL (average diameter 44.5 nm)	Medium VLDL	VLDL	Triglycerides	Medium VLDL
Concentration.of.Small.VLDL.Particles	23509	Concentration of Small VLDL Particles	mmol/l	Lipoprotein subclasses	Small VLDL (average diameter 36.8 nm)	Small VLDL	VLDL	Lipoprotein concentrations	Small VLDL
Total.Lipids.in.Small.VLDL	23510	Total Lipids in Small VLDL	mmol/l	Lipoprotein subclasses	Small VLDL (average diameter 36.8 nm)	Small VLDL	VLDL	Lipids	Small VLDL
Phospholipids.in.Small.VLDL	23511	Phospholipids in Small VLDL	mmol/l	Lipoprotein subclasses	Small VLDL (average diameter 36.8 nm)	Small VLDL	VLDL	Phospholipids	Small VLDL
Cholesterol.in.Small.VLDL	23512	Cholesterol in Small VLDL	mmol/l	Lipoprotein subclasses	Small VLDL (average diameter 36.8 nm)	Small VLDL	VLDL	Cholesterol	Small VLDL
Cholesteryl.Esters.in.Small.VLDL	23513	Cholesteryl Esters in Small VLDL	mmol/l	Lipoprotein subclasses	Small VLDL (average diameter 36.8 nm)	Small VLDL	VLDL	Cholesteryl Esters	Small VLDL
Free.Cholesterol.in.Small.VLDL	23514	Free Cholesterol in Small VLDL	mmol/l	Lipoprotein subclasses	Small VLDL (average diameter 36.8 nm)	Small VLDL	VLDL	Free Cholesterol	Small VLDL
Triglycerides.in.Small.VLDL	23515	Triglycerides in Small VLDL	mmol/l	Lipoprotein subclasses	Small VLDL (average diameter 36.8 nm)	Small VLDL	VLDL	Triglycerides	Small VLDL
Concentration.of.Very.Small.VLDL.Particles	23516	Concentration of Very Small VLDL Particles	mmol/l	Lipoprotein subclasses	Very small VLDL (average diameter 31.3 nm)	Very small VLDL	VLDL	Lipoprotein concentrations	Very small VLDL
Total.Lipids.in.Very.Small.VLDL	23517	Total Lipids in Very Small VLDL	mmol/l	Lipoprotein subclasses	Very small VLDL (average diameter 31.3 nm)	Very small VLDL	VLDL	Lipids	Very small VLDL
Phospholipids.in.Very.Small.VLDL	23518	Phospholipids in Very Small VLDL	mmol/l	Lipoprotein subclasses	Very small VLDL (average diameter 31.3 nm)	Very small VLDL	VLDL	Phospholipids	Very small VLDL
Cholesterol.in.Very.Small.VLDL	23519	Cholesterol in Very Small VLDL	mmol/l	Lipoprotein subclasses	Very small VLDL (average diameter 31.3 nm)	Very small VLDL	VLDL	Cholesterol	Very small VLDL
Cholesteryl.Esters.in.Very.Small.VLDL	23520	Cholesteryl Esters in Very Small VLDL	mmol/l	Lipoprotein subclasses	Very small VLDL (average diameter 31.3 nm)	Very small VLDL	VLDL	Cholesteryl Esters	Very small VLDL
Free.Cholesterol.in.Very.Small.VLDL	23521	Free Cholesterol in Very Small VLDL	mmol/l	Lipoprotein subclasses	Very small VLDL (average diameter 31.3 nm)	Very small VLDL	VLDL	Free Cholesterol	Very small VLDL
Triglycerides.in.Very.Small.VLDL	23522	Triglycerides in Very Small VLDL	mmol/l	Lipoprotein subclasses	Very small VLDL (average diameter 31.3 nm)	Very small VLDL	VLDL	Triglycerides	Very small VLDL
Concentration.of.IDL.Particles	23523	Concentration of IDL Particles	mmol/l	Lipoprotein subclasses	IDL (average diameter 28.6 nm)	IDL	IDL	Lipoprotein concentrations	IDL
Total.Lipids.in.IDL	23524	Total Lipids in IDL	mmol/l	Lipoprotein subclasses	IDL (average diameter 28.6 nm)	IDL	IDL	Lipids	IDL
Phospholipids.in.IDL	23525	Phospholipids in IDL	mmol/l	Lipoprotein subclasses	IDL (average diameter 28.6 nm)	IDL	IDL	Phospholipids	IDL
Cholesterol.in.IDL	23526	Cholesterol in IDL	mmol/l	Lipoprotein subclasses	IDL (average diameter 28.6 nm)	IDL	IDL	Cholesterol	IDL
Cholesteryl.Esters.in.IDL	23527	Cholesteryl Esters in IDL	mmol/l	Lipoprotein subclasses	IDL (average diameter 28.6 nm)	IDL	IDL	Cholesteryl Esters	IDL
Free.Cholesterol.in.IDL	23528	Free Cholesterol in IDL	mmol/l	Lipoprotein subclasses	IDL (average diameter 28.6 nm)	IDL	IDL	Free Cholesterol	IDL
Triglycerides.in.IDL	23529	Triglycerides in IDL	mmol/l	Lipoprotein subclasses	IDL (average diameter 28.6 nm)	IDL	IDL	Triglycerides	IDL
Concentration.of.Large.LDL.Particles	23530	Concentration of Large LDL Particles	mmol/l	Lipoprotein subclasses	Large LDL (average diameter 25.5 nm)	Large LDL	LDL	Lipoprotein concentrations	Large LDL
Total.Lipids.in.Large.LDL	23531	Total Lipids in Large LDL	mmol/l	Lipoprotein subclasses	Large LDL (average diameter 25.5 nm)	Large LDL	LDL	Lipids	Large LDL
Phospholipids.in.Large.LDL	23532	Phospholipids in Large LDL	mmol/l	Lipoprotein subclasses	Large LDL (average diameter 25.5 nm)	Large LDL	LDL	Phospholipids	Large LDL
Cholesterol.in.Large.LDL	23533	Cholesterol in Large LDL	mmol/l	Lipoprotein subclasses	Large LDL (average diameter 25.5 nm)	Large LDL	LDL	Cholesterol	Large LDL
Cholesteryl.Esters.in.Large.LDL	23534	Cholesteryl Esters in Large LDL	mmol/l	Lipoprotein subclasses	Large LDL (average diameter 25.5 nm)	Large LDL	LDL	Cholesteryl Esters	Large LDL
Free.Cholesterol.in.Large.LDL	23535	Free Cholesterol in Large LDL	mmol/l	Lipoprotein subclasses	Large LDL (average diameter 25.5 nm)	Large LDL	LDL	Free Cholesterol	Large LDL
Triglycerides.in.Large.LDL	23536	Triglycerides in Large LDL	mmol/l	Lipoprotein subclasses	Large LDL (average diameter 25.5 nm)	Large LDL	LDL	Triglycerides	Large LDL
Concentration.of.Medium.LDL.Particles	23537	Concentration of Medium LDL Particles	mmol/l	Lipoprotein subclasses	Medium LDL (average diameter 23 nm)	Medium LDL	LDL	Lipoprotein concentrations	Medium LDL
Total.Lipids.in.Medium.LDL	23538	Total Lipids in Medium LDL	mmol/l	Lipoprotein subclasses	Medium LDL (average diameter 23 nm)	Medium LDL	LDL	Lipids	Medium LDL
Phospholipids.in.Medium.LDL	23539	Phospholipids in Medium LDL	mmol/l	Lipoprotein subclasses	Medium LDL (average diameter 23 nm)	Medium LDL	LDL	Phospholipids	Medium LDL
Cholesterol.in.Medium.LDL	23540	Cholesterol in Medium LDL	mmol/l	Lipoprotein subclasses	Medium LDL (average diameter 23 nm)	Medium LDL	LDL	Cholesterol	Medium LDL
Cholesteryl.Esters.in.Medium.LDL	23541	Cholesteryl Esters in Medium LDL	mmol/l	Lipoprotein subclasses	Medium LDL (average diameter 23 nm)	Medium LDL	LDL	Cholesteryl Esters	Medium LDL
Free.Cholesterol.in.Medium.LDL	23542	Free Cholesterol in Medium LDL	mmol/l	Lipoprotein subclasses	Medium LDL (average diameter 23 nm)	Medium LDL	LDL	Free Cholesterol	Medium LDL
Triglycerides.in.Medium.LDL	23543	Triglycerides in Medium LDL	mmol/l	Lipoprotein subclasses	Medium LDL (average diameter 23 nm)	Medium LDL	LDL	Triglycerides	Medium LDL
Concentration.of.Small.LDL.Particles	23544	Concentration of Small LDL Particles	mmol/l	Lipoprotein subclasses	Small LDL (average diameter 18.7 nm)	Small LDL	LDL	Lipoprotein concentrations	Small LDL
Total.Lipids.in.Small.LDL	23545	Total Lipids in Small LDL	mmol/l	Lipoprotein subclasses	Small LDL (average diameter 18.7 nm)	Small LDL	LDL	Lipids	Small LDL
Phospholipids.in.Small.LDL	23546	Phospholipids in Small LDL	mmol/l	Lipoprotein subclasses	Small LDL (average diameter 18.7 nm)	Small LDL	LDL	Phospholipids	Small LDL
Cholesterol.in.Small.LDL	23547	Cholesterol in Small LDL	mmol/l	Lipoprotein subclasses	Small LDL (average diameter 18.7 nm)	Small LDL	LDL	Cholesterol	Small LDL
Cholesteryl.Esters.in.Small.LDL	23548	Cholesteryl Esters in Small LDL	mmol/l	Lipoprotein subclasses	Small LDL (average diameter 18.7 nm)	Small LDL	LDL	Cholesteryl Esters	Small LDL
Free.Cholesterol.in.Small.LDL	23549	Free Cholesterol in Small LDL	mmol/l	Lipoprotein subclasses	Small LDL (average diameter 18.7 nm)	Small LDL	LDL	Free Cholesterol	Small LDL
Triglycerides.in.Small.LDL	23550	Triglycerides in Small LDL	mmol/l	Lipoprotein subclasses	Small LDL (average diameter 18.7 nm)	Small LDL	LDL	Triglycerides	Small LDL
Concentration.of.Very.Large.HDL.Particles	23551	Concentration of Very Large HDL Particles	mmol/l	Lipoprotein subclasses	Very large HDL (average diameter 14.3 nm)	Very large HDL	HDL	Lipoprotein concentrations	Very large HDL
Total.Lipids.in.Very.Large.HDL	23552	Total Lipids in Very Large HDL	mmol/l	Lipoprotein subclasses	Very large HDL (average diameter 14.3 nm)	Very large HDL	HDL	Lipids	Very large HDL
Phospholipids.in.Very.Large.HDL	23553	Phospholipids in Very Large HDL	mmol/l	Lipoprotein subclasses	Very large HDL (average diameter 14.3 nm)	Very large HDL	HDL	Phospholipids	Very large HDL
Cholesterol.in.Very.Large.HDL	23554	Cholesterol in Very Large HDL	mmol/l	Lipoprotein subclasses	Very large HDL (average diameter 14.3 nm)	Very large HDL	HDL	Cholesterol	Very large HDL
Cholesteryl.Esters.in.Very.Large.HDL	23555	Cholesteryl Esters in Very Large HDL	mmol/l	Lipoprotein subclasses	Very large HDL (average diameter 14.3 nm)	Very large HDL	HDL	Cholesteryl Esters	Very large HDL
Free.Cholesterol.in.Very.Large.HDL	23556	Free Cholesterol in Very Large HDL	mmol/l	Lipoprotein subclasses	Very large HDL (average diameter 14.3 nm)	Very large HDL	HDL	Free Cholesterol	Very large HDL
Triglycerides.in.Very.Large.HDL	23557	Triglycerides in Very Large HDL	mmol/l	Lipoprotein subclasses	Very large HDL (average diameter 14.3 nm)	Very large HDL	HDL	Triglycerides	Very large HDL
Concentration.of.Large.HDL.Particles	23558	Concentration of Large HDL Particles	mmol/l	Lipoprotein subclasses	Large HDL (average diameter 12.1 nm)	Large HDL	HDL	Lipoprotein concentrations	Large HDL
Total.Lipids.in.Large.HDL	23559	Total Lipids in Large HDL	mmol/l	Lipoprotein subclasses	Large HDL (average diameter 12.1 nm)	Large HDL	HDL	Lipids	Large HDL
Phospholipids.in.Large.HDL	23560	Phospholipids in Large HDL	mmol/l	Lipoprotein subclasses	Large HDL (average diameter 12.1 nm)	Large HDL	HDL	Phospholipids	Large HDL
Cholesterol.in.Large.HDL	23561	Cholesterol in Large HDL	mmol/l	Lipoprotein subclasses	Large HDL (average diameter 12.1 nm)	Large HDL	HDL	Cholesterol	Large HDL
Cholesteryl.Esters.in.Large.HDL	23562	Cholesteryl Esters in Large HDL	mmol/l	Lipoprotein subclasses	Large HDL (average diameter 12.1 nm)	Large HDL	HDL	Cholesteryl Esters	Large HDL
Free.Cholesterol.in.Large.HDL	23563	Free Cholesterol in Large HDL	mmol/l	Lipoprotein subclasses	Large HDL (average diameter 12.1 nm)	Large HDL	HDL	Free Cholesterol	Large HDL
Triglycerides.in.Large.HDL	23564	Triglycerides in Large HDL	mmol/l	Lipoprotein subclasses	Large HDL (average diameter 12.1 nm)	Large HDL	HDL	Triglycerides	Large HDL
Concentration.of.Medium.HDL.Particles	23565	Concentration of Medium HDL Particles	mmol/l	Lipoprotein subclasses	Medium HDL (average diameter 10.9 nm)	Medium HDL	HDL	Lipoprotein concentrations	Medium HDL
Total.Lipids.in.Medium.HDL	23566	Total Lipids in Medium HDL	mmol/l	Lipoprotein subclasses	Medium HDL (average diameter 10.9 nm)	Medium HDL	HDL	Lipids	Medium HDL
Phospholipids.in.Medium.HDL	23567	Phospholipids in Medium HDL	mmol/l	Lipoprotein subclasses	Medium HDL (average diameter 10.9 nm)	Medium HDL	HDL	Phospholipids	Medium HDL
Cholesterol.in.Medium.HDL	23568	Cholesterol in Medium HDL	mmol/l	Lipoprotein subclasses	Medium HDL (average diameter 10.9 nm)	Medium HDL	HDL	Cholesterol	Medium HDL
Cholesteryl.Esters.in.Medium.HDL	23569	Cholesteryl Esters in Medium HDL	mmol/l	Lipoprotein subclasses	Medium HDL (average diameter 10.9 nm)	Medium HDL	HDL	Cholesteryl Esters	Medium HDL
Free.Cholesterol.in.Medium.HDL	23570	Free Cholesterol in Medium HDL	mmol/l	Lipoprotein subclasses	Medium HDL (average diameter 10.9 nm)	Medium HDL	HDL	Free Cholesterol	Medium HDL
Triglycerides.in.Medium.HDL	23571	Triglycerides in Medium HDL	mmol/l	Lipoprotein subclasses	Medium HDL (average diameter 10.9 nm)	Medium HDL	HDL	Triglycerides	Medium HDL
Concentration.of.Small.HDL.Particles	23572	Concentration of Small HDL Particles	mmol/l	Lipoprotein subclasses	Small HDL (average diameter 8.7 nm)	Small HDL	HDL	Lipoprotein concentrations	Small HDL
Total.Lipids.in.Small.HDL	23573	Total Lipids in Small HDL	mmol/l	Lipoprotein subclasses	Small HDL (average diameter 8.7 nm)	Small HDL	HDL	Lipids	Small HDL
Phospholipids.in.Small.HDL	23574	Phospholipids in Small HDL	mmol/l	Lipoprotein subclasses	Small HDL (average diameter 8.7 nm)	Small HDL	HDL	Phospholipids	Small HDL
Cholesterol.in.Small.HDL	23575	Cholesterol in Small HDL	mmol/l	Lipoprotein subclasses	Small HDL (average diameter 8.7 nm)	Small HDL	HDL	Cholesterol	Small HDL
Cholesteryl.Esters.in.Small.HDL	23576	Cholesteryl Esters in Small HDL	mmol/l	Lipoprotein subclasses	Small HDL (average diameter 8.7 nm)	Small HDL	HDL	Cholesteryl Esters	Small HDL
Free.Cholesterol.in.Small.HDL	23577	Free Cholesterol in Small HDL	mmol/l	Lipoprotein subclasses	Small HDL (average diameter 8.7 nm)	Small HDL	HDL	Free Cholesterol	Small HDL
Triglycerides.in.Small.HDL	23578	Triglycerides in Small HDL	mmol/l	Lipoprotein subclasses	Small HDL (average diameter 8.7 nm)	Small HDL	HDL	Triglycerides	Small HDL

## Sheet: ST2
List of 81 ratios proposed by Nightingale (NightRatios)
Biomarker_name	Unit	Numerator_Field_ID	Denominator_Field_ID	Numerator_Field_title	Denominator_Field_title
Ratio of triglycerides to phosphoglycerides	ratio	23407	23434	Total Triglycerides	Phosphoglycerides
Ratio of apolipoprotein B to apolipoprotein A1	ratio	23439	23440	Apolipoprotein B	Apolipoprotein A1
Ratio of omega-3 fatty acids to total fatty acids	%	23444	23442	Omega-3 Fatty Acids	Total Fatty Acids
Ratio of omega-6 fatty acids to total fatty acids	%	23445	23442	Omega-6 Fatty Acids	Total Fatty Acids
Ratio of polyunsaturated fatty acids to total fatty acids	%	23446	23442	Polyunsaturated Fatty Acids	Total Fatty Acids
Ratio of monounsaturated fatty acids to total fatty acids	%	23447	23442	Monounsaturated Fatty Acids	Total Fatty Acids
Ratio of saturated fatty acids to total fatty acids	%	23448	23442	Saturated Fatty Acids	Total Fatty Acids
Ratio of linoleic acid to total fatty acids	%	23449	23442	Linoleic Acid	Total Fatty Acids
Ratio of docosahexaenoic acid to total fatty acids	%	23450	23442	Docosahexaenoic Acid	Total Fatty Acids
Ratio of polyunsaturated fatty acids to monounsaturated fatty acids	ratio	23446	23447	Polyunsaturated Fatty Acids	Monounsaturated Fatty Acids
Ratio of omega-6 fatty acids to omega-3 fatty acids	ratio	23445	23444	Omega-6 Fatty Acids	Omega-3 Fatty Acids
Phospholipids to total lipids ratio in chylomicrons and extremely large VLDL	%	23483	23482	Phospholipids in Chylomicrons and Extremely Large VLDL	Total Lipids in Chylomicrons and Extremely Large VLDL
Cholesterol to total lipids ratio in chylomicrons and extremely large VLDL	%	23484	23482	Cholesterol in Chylomicrons and Extremely Large VLDL	Total Lipids in Chylomicrons and Extremely Large VLDL
Cholesteryl esters to total lipids ratio in chylomicrons and extremely large VLDL	%	23485	23482	Cholesteryl Esters in Chylomicrons and Extremely Large VLDL	Total Lipids in Chylomicrons and Extremely Large VLDL
Free cholesterol to total lipids ratio in chylomicrons and extremely large VLDL	%	23486	23482	Free Cholesterol in Chylomicrons and Extremely Large VLDL	Total Lipids in Chylomicrons and Extremely Large VLDL
Triglycerides to total lipids ratio in chylomicrons and extremely large VLDL	%	23487	23482	Triglycerides in Chylomicrons and Extremely Large VLDL	Total Lipids in Chylomicrons and Extremely Large VLDL
Phospholipids to total lipids ratio in very large VLDL	%	23490	23489	Phospholipids in Very Large VLDL	Total Lipids in Very Large VLDL
Cholesterol to total lipids ratio in very large VLDL	%	23491	23489	Cholesterol in Very Large VLDL	Total Lipids in Very Large VLDL
Cholesteryl esters to total lipids ratio in very large VLDL	%	23492	23489	Cholesteryl Esters in Very Large VLDL	Total Lipids in Very Large VLDL
Free cholesterol to total lipids ratio in very large VLDL	%	23493	23489	Free Cholesterol in Very Large VLDL	Total Lipids in Very Large VLDL
Triglycerides to total lipids ratio in very large VLDL	%	23494	23489	Triglycerides in Very Large VLDL	Total Lipids in Very Large VLDL
Phospholipids to total lipids ratio in large VLDL	%	23497	23496	Phospholipids in Large VLDL	Total Lipids in Large VLDL
Cholesterol to total lipids ratio in large VLDL	%	23498	23496	Cholesterol in Large VLDL	Total Lipids in Large VLDL
Cholesteryl esters to total lipids ratio in large VLDL	%	23499	23496	Cholesteryl Esters in Large VLDL	Total Lipids in Large VLDL
Free cholesterol to total lipids ratio in large VLDL	%	23500	23496	Free Cholesterol in Large VLDL	Total Lipids in Large VLDL
Triglycerides to total lipids ratio in large VLDL	%	23501	23496	Triglycerides in Large VLDL	Total Lipids in Large VLDL
Phospholipids to total lipids ratio in medium VLDL	%	23504	23503	Phospholipids in Medium VLDL	Total Lipids in Medium VLDL
Cholesterol to total lipids ratio in medium VLDL	%	23505	23503	Cholesterol in Medium VLDL	Total Lipids in Medium VLDL
Cholesteryl esters to total lipids ratio in medium VLDL	%	23506	23503	Cholesteryl Esters in Medium VLDL	Total Lipids in Medium VLDL
Free cholesterol to total lipids ratio in medium VLDL	%	23507	23503	Free Cholesterol in Medium VLDL	Total Lipids in Medium VLDL
Triglycerides to total lipids ratio in medium VLDL	%	23508	23503	Triglycerides in Medium VLDL	Total Lipids in Medium VLDL
Phospholipids to total lipids ratio in small VLDL	%	23511	23510	Phospholipids in Small VLDL	Total Lipids in Small VLDL
Cholesterol to total lipids ratio in small VLDL	%	23512	23510	Cholesterol in Small VLDL	Total Lipids in Small VLDL
Cholesteryl esters to total lipids ratio in small VLDL	%	23513	23510	Cholesteryl Esters in Small VLDL	Total Lipids in Small VLDL
Free cholesterol to total lipids ratio in small VLDL	%	23514	23510	Free Cholesterol in Small VLDL	Total Lipids in Small VLDL
Triglycerides to total lipids ratio in small VLDL	%	23515	23510	Triglycerides in Small VLDL	Total Lipids in Small VLDL
Phospholipids to total lipids ratio in very small VLDL	%	23518	23517	Phospholipids in Very Small VLDL	Total Lipids in Very Small VLDL
Cholesterol to total lipids ratio in very small VLDL	%	23519	23517	Cholesterol in Very Small VLDL	Total Lipids in Very Small VLDL
Cholesteryl esters to total lipids ratio in very small VLDL	%	23520	23517	Cholesteryl Esters in Very Small VLDL	Total Lipids in Very Small VLDL
Free cholesterol to total lipids ratio in very small VLDL	%	23521	23517	Free Cholesterol in Very Small VLDL	Total Lipids in Very Small VLDL
Triglycerides to total lipids ratio in very small VLDL	%	23522	23517	Triglycerides in Very Small VLDL	Total Lipids in Very Small VLDL
Phospholipids to total lipids ratio in IDL	%	23525	23524	Phospholipids in IDL	Total Lipids in IDL
Cholesterol to total lipids ratio in IDL	%	23526	23524	Cholesterol in IDL	Total Lipids in IDL
Cholesteryl esters to total lipids ratio in IDL	%	23527	23524	Cholesteryl Esters in IDL	Total Lipids in IDL
Free cholesterol to total lipids ratio in IDL	%	23528	23524	Free Cholesterol in IDL	Total Lipids in IDL
Triglycerides to total lipids ratio in IDL	%	23529	23524	Triglycerides in IDL	Total Lipids in IDL
Phospholipids to total lipids ratio in large LDL	%	23532	23531	Phospholipids in Large LDL	Total Lipids in Large LDL
Cholesterol to total lipids ratio in large LDL	%	23533	23531	Cholesterol in Large LDL	Total Lipids in Large LDL
Cholesteryl esters to total lipids ratio in large LDL	%	23534	23531	Cholesteryl Esters in Large LDL	Total Lipids in Large LDL
Free cholesterol to total lipids ratio in large LDL	%	23535	23531	Free Cholesterol in Large LDL	Total Lipids in Large LDL
Triglycerides to total lipids ratio in large LDL	%	23536	23531	Triglycerides in Large LDL	Total Lipids in Large LDL
Phospholipids to total lipids ratio in medium LDL	%	23539	23538	Phospholipids in Medium LDL	Total Lipids in Medium LDL
Cholesterol to total lipids ratio in medium LDL	%	23540	23538	Cholesterol in Medium LDL	Total Lipids in Medium LDL
Cholesteryl esters to total lipids ratio in medium LDL	%	23541	23538	Cholesteryl Esters in Medium LDL	Total Lipids in Medium LDL
Free cholesterol to total lipids ratio in medium LDL	%	23542	23538	Free Cholesterol in Medium LDL	Total Lipids in Medium LDL
Triglycerides to total lipids ratio in medium LDL	%	23543	23538	Triglycerides in Medium LDL	Total Lipids in Medium LDL
Phospholipids to total lipids ratio in small LDL	%	23546	23545	Phospholipids in Small LDL	Total Lipids in Small LDL
Cholesterol to total lipids ratio in small LDL	%	23547	23545	Cholesterol in Small LDL	Total Lipids in Small LDL
Cholesteryl esters to total lipids ratio in small LDL	%	23548	23545	Cholesteryl Esters in Small LDL	Total Lipids in Small LDL
Free cholesterol to total lipids ratio in small LDL	%	23549	23545	Free Cholesterol in Small LDL	Total Lipids in Small LDL
Triglycerides to total lipids ratio in small LDL	%	23550	23545	Triglycerides in Small LDL	Total Lipids in Small LDL
Phospholipids to total lipids ratio in very large HDL	%	23553	23552	Phospholipids in Very Large HDL	Total Lipids in Very Large HDL
Cholesterol to total lipids ratio in very large HDL	%	23554	23552	Cholesterol in Very Large HDL	Total Lipids in Very Large HDL
Cholesteryl esters to total lipids ratio in very large HDL	%	23555	23552	Cholesteryl Esters in Very Large HDL	Total Lipids in Very Large HDL
Free cholesterol to total lipids ratio in very large HDL	%	23556	23552	Free Cholesterol in Very Large HDL	Total Lipids in Very Large HDL
Triglycerides to total lipids ratio in very large HDL	%	23557	23552	Triglycerides in Very Large HDL	Total Lipids in Very Large HDL
Phospholipids to total lipids ratio in large HDL	%	23560	23559	Phospholipids in Large HDL	Total Lipids in Large HDL
Cholesterol to total lipids ratio in large HDL	%	23561	23559	Cholesterol in Large HDL	Total Lipids in Large HDL
Cholesteryl esters to total lipids ratio in large HDL	%	23562	23559	Cholesteryl Esters in Large HDL	Total Lipids in Large HDL
Free cholesterol to total lipids ratio in large HDL	%	23563	23559	Free Cholesterol in Large HDL	Total Lipids in Large HDL
Triglycerides to total lipids ratio in large HDL	%	23564	23559	Triglycerides in Large HDL	Total Lipids in Large HDL
Phospholipids to total lipids ratio in medium HDL	%	23567	23566	Phospholipids in Medium HDL	Total Lipids in Medium HDL
Cholesterol to total lipids ratio in medium HDL	%	23568	23566	Cholesterol in Medium HDL	Total Lipids in Medium HDL
Cholesteryl esters to total lipids ratio in medium HDL	%	23569	23566	Cholesteryl Esters in Medium HDL	Total Lipids in Medium HDL
Free cholesterol to total lipids ratio in medium HDL	%	23570	23566	Free Cholesterol in Medium HDL	Total Lipids in Medium HDL
Triglycerides to total lipids ratio in medium HDL	%	23571	23566	Triglycerides in Medium HDL	Total Lipids in Medium HDL
Phospholipids to total lipids ratio in small HDL	%	23574	23573	Phospholipids in Small HDL	Total Lipids in Small HDL
Cholesterol to total lipids ratio in small HDL	%	23575	23573	Cholesterol in Small HDL	Total Lipids in Small HDL
Cholesteryl esters to total lipids ratio in small HDL	%	23576	23573	Cholesteryl Esters in Small HDL	Total Lipids in Small HDL
Free cholesterol to total lipids ratio in small HDL	%	23577	23573	Free Cholesterol in Small HDL	Total Lipids in Small HDL
Triglycerides to total lipids ratio in small HDL	%	23578	23573	Triglycerides in Small HDL	Total Lipids in Small HDL

## Sheet: ST3
	Lead association data for all computed models (based on 2,624 entries of ST3 by Graham et al.), incl. replication in non-Caucasians
altID	sort	ST3 sort	nearby genes	primary_comment	primary	filter on 1,054 lead variants	filter on 274 variants that are sign. for one of the five lipid traits	filter on 446 variants that are sign for one of the NMR traits	filter on 554 variants that are sign. for a ratio or one of the NMR trait	filter on 347 variants with sign. p-gain	filter on 208 variants with strongest sign. log10pgain for each ratio	Filter on main LPmtr genes	LPmtr genes	Link to lipid metabolism, tranport and remodelling	EAF	rsid	Chr	pos	EffectAllele	OtherAllele	nterms	model	ref log10p pvalue	ref log10p Bonf	ref log10p pvalue trait	log10p for reftrait	log10p for reftrait Bonf	NMRname for reftrait	max log10p [excl. ratios]	max log10p [excl. ratios] Bonf	max log10p [excl. ratios] trait	NMRlog10p	replicated [excl. ratios]	power [excl. ratios]	max log10p [NightRatios]	max log10p [NightRatios] Bonf	max log10p [NightRatios] trait	max log10p [incl. ratios]	max log10p [incl. ratios] Bonf	max log10p [incl. ratios] trait	RATIOlog10p	replicated [incl. ratios]	power [incl. ratios]	max log10pgain [NightRatios]	max log10pgain [NightRatios] trait	max log10pgain	max log10pgain trait	max log10p excl. - reftrait	max log10p NightRatio-excl.
19:45412079:C:T	1	2397	APOE	r2 = 0.994 with rs1065853	FALSE	FALSE	FALSE	FALSE	FALSE	FALSE	FALSE	FALSE	.	not annotated	0.918773	rs7412	19	45412079	T	C	0	rs7412	6282.42	TRUE	LDL	3134.07	TRUE	Clinical.LDL.Cholesterol	4428.39	TRUE	Free.Cholesterol.in.Small.LDL	.	.	.	4428.39	TRUE	Free.Cholesterol.in.Small.LDL	5167.82	TRUE	Cholesteryl.Esters.in.IDL / Total.Phospholipids.in.Lipoprotein.Particles	.	.	.	2182.59	Triglycerides to total lipids ratio in small VLDL	2999.16	Triglycerides.in.Small.VLDL / Total.Lipids.in.Medium.VLDL	1294.33	0
19:45412079:C:T	2	2398	.	duplicate model	FALSE	FALSE	FALSE	FALSE	FALSE	FALSE	FALSE	FALSE	.	not annotated	.	rs7412	19	45412079	T	C	.	.	3350.97	TRUE	nonHDL	.	.	.	.	.	.	.	.	.	.	.	.	.	.	.	.	.	.	.	.	.	.	.	.
16:56991363:C:T	3	1985	CETP,AC012181.1-CETP,AC012181.1	r2 = 0.997 with rs821840	FALSE	FALSE	FALSE	FALSE	FALSE	FALSE	FALSE	FALSE	.	not annotated	0.675497	rs183130	16	56991363	T	C	0	rs183130	3076.26	TRUE	HDL	1204.28	TRUE	HDL.Cholesterol	1337.95	TRUE	Cholesteryl.Esters.in.Large.HDL	.	.	.	1337.95	TRUE	Cholesteryl.Esters.in.Large.HDL	1876.74	TRUE	Cholesteryl.Esters.in.Small.VLDL / Phospholipids.in.Small.VLDL	.	.	.	937.748	Triglycerides to total lipids ratio in large VLDL	1444.66	Cholesteryl.Esters.in.Small.VLDL / Phospholipids.in.Small.VLDL	133.674	0
19:45412079:C:T	4	2399	.	duplicate model	FALSE	FALSE	FALSE	FALSE	FALSE	FALSE	FALSE	FALSE	.	not annotated	.	rs7412	19	45412079	T	C	.	.	2867.7	TRUE	TC	.	.	.	.	.	.	.	.	.	.	.	.	.	.	.	.	.	.	.	.	.	.	.	.
11:116648917:G:C	5	1585	ZNF259,AP006216.10,AP006216.11	r2 = 1 with rs964184	FALSE	FALSE	FALSE	FALSE	FALSE	FALSE	FALSE	FALSE	.	not annotated	0.132136	rs964184	11	116648917	C	G	0	rs964184	2156.54	TRUE	logTG	699.925	TRUE	Total.Triglycerides	794.438	TRUE	Triglycerides.in.Small.VLDL	.	.	.	794.438	TRUE	Triglycerides.in.Small.VLDL	900.273	TRUE	Polyunsaturated.Fatty.Acids / Sphingomyelins	.	.	.	488.05	Free cholesterol to total lipids ratio in small LDL	663.426	Free.Cholesterol.in.LDL / LDL.Cholesterol	94.5132	0
1:109817590:G:T	6	148	PSRC1,CELSR2	r2 = 1 with rs12740374	FALSE	FALSE	FALSE	FALSE	FALSE	FALSE	FALSE	FALSE	.	not annotated	0.778672	rs12740374	1	109817590	T	G	0	rs12740374	1289.15	TRUE	LDL	393.208	TRUE	Clinical.LDL.Cholesterol	504.869	TRUE	Phospholipids.in.Small.LDL	.	.	.	504.869	TRUE	Phospholipids.in.Small.LDL	558.575	TRUE	Phospholipids.in.Small.HDL / Total.Lipids.in.Large.LDL	.	.	.	313.067	Free cholesterol to total lipids ratio in small HDL	424.621	Free.Cholesterol.in.Small.HDL / Phospholipids.in.Small.HDL	111.661	0
1:109817590:G:T	7	150	.	duplicate model	FALSE	FALSE	FALSE	FALSE	FALSE	FALSE	FALSE	FALSE	.	not annotated	.	rs12740374	1	109817590	T	G	.	.	902.677	TRUE	TC	.	.	.	.	.	.	.	.	.	.	.	.	.	.	.	.	.	.	.	.	.	.	.	.
8:19819724:C:G	8	1190	LPL	primary	TRUE	TRUE	TRUE	TRUE	TRUE	TRUE	TRUE	TRUE	LPL	ligand for receptor-mediated lipoprotein uptake; hydrolysis of triglycerides of circulating TRL particles	0.899046	rs328	8	19819724	G	C	0	rs328	882.699	TRUE	logTG	373.211	TRUE	Total.Triglycerides	455.516	TRUE	Triglycerides.in.Small.VLDL	53.4578	TRUE	1	528.721	TRUE	Triglycerides to total lipids ratio in small HDL	630.581	TRUE	Triglycerides.in.Small.VLDL / Saturated.Fatty.Acids	80.7619	TRUE	1	388.846	Free cholesterol to total lipids ratio in medium LDL	501.375	Cholesterol.in.IDL / Remnant.Cholesterol..Non.HDL..Non.LDL..Cholesterol.	82.3056	73.2044
2:27730940:T:C	9	342	GCKR	primary	TRUE	TRUE	TRUE	TRUE	TRUE	TRUE	TRUE	TRUE	GCKR	glucokinase regulator, pleiotropic locus	0.392023	rs1260326	2	27730940	C	T	0	rs1260326	877.138	TRUE	logTG	289.509	TRUE	Total.Triglycerides	331.144	TRUE	Monounsaturated.Fatty.Acids	63.3472	TRUE	1	331.144	TRUE	Monounsaturated.Fatty.Acids	487.447	TRUE	Glutamine / Total.Fatty.Acids	86.3544	TRUE	1	178.125	Free cholesterol to total lipids ratio in large LDL	222.602	Free.Cholesterol.in.Medium.HDL / Cholesteryl.Esters.in.HDL	41.6355	0
19:45412079:C:T	10	2395	.	duplicate model	FALSE	FALSE	FALSE	FALSE	FALSE	FALSE	FALSE	FALSE	.	not annotated	.	rs7412	19	45412079	T	C	.	.	835.332	TRUE	LDL	.	.	.	.	.	.	.	.	.	.	.	.	.	.	.	.	.	.	.	.	.	.	.	.
1:109817590:G:T	11	149	.	duplicate model	FALSE	FALSE	FALSE	FALSE	FALSE	FALSE	FALSE	FALSE	.	not annotated	.	rs12740374	1	109817590	T	G	.	.	763.176	TRUE	nonHDL	.	.	.	.	.	.	.	.	.	.	.	.	.	.	.	.	.	.	.	.	.	.	.	.
2:21267461:G:A	12	289	APOB-TDRD15,APOB	primary	TRUE	TRUE	TRUE	TRUE	TRUE	TRUE	TRUE	TRUE	APOB48	tags T98I variant, MS-peptide TSQC[TI]LK; major constituent of chylomicrons (apo B-48), LDL (apo B-100) and VLDL (apo B-100)	0.660929	rs934197	2	21267461	A	G	0	rs934197	692.744	TRUE	LDL	221.965	TRUE	Clinical.LDL.Cholesterol	334.926	TRUE	Cholesteryl.Esters.in.Medium.VLDL	37.0026	TRUE	1	334.926	TRUE	Cholesteryl.Esters.in.Medium.VLDL	365.937	TRUE	Cholesterol.in.Medium.VLDL / Glycoprotein.Acetyls	38.4646	TRUE	1	129.331	Phospholipids to total lipids ratio in large HDL	246.242	Concentration.of.HDL.Particles / Total.Concentration.of.Lipoprotein.Particles	112.961	0
15:58678720:T:C	13	1913	ALDH1A2	primary	TRUE	TRUE	TRUE	TRUE	TRUE	TRUE	TRUE	TRUE	ALDH1A2	involved in retinoic acid metabolism; recognizes as substrates free retinal and cellular retinol-binding protein-bound retinal	0.346978	rs261290	15	58678720	C	T	0	rs261290	678.636	TRUE	HDL	311.926	TRUE	HDL.Cholesterol	2006.62	TRUE	Triglycerides.in.Large.HDL	227.182	TRUE	1	2006.62	TRUE	Triglycerides.in.Large.HDL	2589.82	TRUE	Free.Cholesterol.in.Small.HDL / Concentration.of.Small.HDL.Particles	307.687	TRUE	1	1351.21	Free cholesterol to total lipids ratio in small HDL	2446.32	Free.Cholesterol.in.Small.HDL / Concentration.of.Small.HDL.Particles	1694.7	0
8:19824667:C:T	14	1195	LPL	r2 = 1 with rs15285	FALSE	FALSE	FALSE	FALSE	FALSE	FALSE	FALSE	FALSE	.	not annotated	0.715841	rs15285	8	19824667	T	C	0	rs15285	631.285	TRUE	HDL	298.111	TRUE	HDL.Cholesterol	349.953	TRUE	Triglycerides.in.Small.VLDL	.	.	.	457.473	TRUE	Triglycerides to total lipids ratio in small HDL	518.504	TRUE	Triglycerides.in.Small.VLDL / Saturated.Fatty.Acids	.	.	.	300.959	Free cholesterol to total lipids ratio in large LDL	420.855	Cholesterol.in.IDL / Remnant.Cholesterol..Non.HDL..Non.LDL..Cholesterol.	51.8416	107.52
19:45413233:G:T	15	2403	APOE-APOC1,APOC1,APOE	primary	TRUE	TRUE	TRUE	TRUE	TRUE	TRUE	TRUE	TRUE	APOE	a core component of plasma lipoproteins; involved in their production, conversion and clearance	0.919124	rs1065853	19	45413233	T	G	0	rs1065853	608.912	TRUE	LDL	3141.09	TRUE	Clinical.LDL.Cholesterol	4443.83	TRUE	Free.Cholesterol.in.Small.LDL	646.086	TRUE	1	4443.83	TRUE	Free.Cholesterol.in.Small.LDL	5190.61	TRUE	Cholesteryl.Esters.in.IDL / Total.Phospholipids.in.Lipoprotein.Particles	801.818	TRUE	1	2194.06	Phospholipids to total lipids ratio in small VLDL	3013.2	Triglycerides.in.Small.VLDL / Total.Lipids.in.Medium.VLDL	1302.74	0
2:21267461:G:A	16	291	.	duplicate model	FALSE	FALSE	FALSE	FALSE	FALSE	FALSE	FALSE	FALSE	.	not annotated	.	rs934197	2	21267461	A	G	.	.	543.403	TRUE	TC	.	.	.	.	.	.	.	.	.	.	.	.	.	.	.	.	.	.	.	.	.	.	.	.
11:116648917:G:C	17	1586	.	duplicate model	FALSE	FALSE	FALSE	FALSE	FALSE	FALSE	FALSE	FALSE	.	not annotated	.	rs964184	11	116648917	C	G	.	.	543.393	TRUE	nonHDL	.	.	.	.	.	.	.	.	.	.	.	.	.	.	.	.	.	.	.	.	.	.	.	.
11:116663707:G:A	18	1598	APOA5-AP006216.5,ZNF259,APOA5	primary	TRUE	TRUE	TRUE	TRUE	TRUE	TRUE	FALSE	FALSE	APOA1, APOA4, APOA5, APOC3 locus (2)	secondary association with LPmtr gene	0.0586217	rs662799	11	116663707	A	G	0	rs662799	524.816	TRUE	logTG	383.494	TRUE	Total.Triglycerides	443.597	TRUE	Triglycerides.in.Small.VLDL	91.5163	TRUE	1	443.597	TRUE	Triglycerides.in.Small.VLDL	480.102	TRUE	Triglycerides.in.Small.VLDL / Valine	107.545	TRUE	1	287.965	Free cholesterol to total lipids ratio in large LDL	372.995	Free.Cholesterol.in.LDL / LDL.Cholesterol	60.1035	0
7:73020337:C:G	19	1093	MLXIPL	r2 = 0.998 with rs13246993	FALSE	FALSE	FALSE	FALSE	FALSE	FALSE	FALSE	FALSE	.	not annotated	0.871199	rs3812316	7	73020337	G	C	0	rs3812316	486.383	TRUE	logTG	197.045	TRUE	Total.Triglycerides	249.349	TRUE	Triglycerides.in.Small.VLDL	.	.	.	306.761	TRUE	Triglycerides to total lipids ratio in very small VLDL	349.192	TRUE	Cholesterol.in.Very.Small.VLDL / Triglycerides.in.Small.VLDL	.	.	.	265.743	Cholesterol to total lipids ratio in very small VLDL	285.524	Cholesteryl.Esters.in.Large.LDL / Cholesterol.in.Large.LDL	52.3039	57.4124
19:45416178:G:T	20	2411	APOE-APOC1,APOC1,APOE	r2 = 0.996 with rs5117	FALSE	FALSE	FALSE	FALSE	FALSE	FALSE	FALSE	FALSE	.	not annotated	0.761806	rs483082	19	45416178	T	G	0	rs483082	476.953	TRUE	logTG	59.7835	TRUE	Total.Triglycerides	253.065	TRUE	Free.Cholesterol.in.Small.LDL	.	.	.	488	TRUE	Cholesteryl esters to total lipids ratio in IDL	563.667	TRUE	Cholesteryl.Esters.in.IDL / Total.Cholesterol	.	.	.	285.257	Cholesterol to total lipids ratio in very small VLDL	338.774	Cholesteryl.Esters.in.Small.VLDL / Cholesterol.in.Small.VLDL	193.282	234.935
2:21267461:G:A	21	290	.	duplicate model	FALSE	FALSE	FALSE	FALSE	FALSE	FALSE	FALSE	FALSE	.	not annotated	.	rs934197	2	21267461	A	G	.	.	471.791	TRUE	nonHDL	.	.	.	.	.	.	.	.	.	.	.	.	.	.	.	.	.	.	.	.	.	.	.	.
8:126500031:C:G	22	1275	RP11-136O12.2	r2 = 1 with rs28601761	FALSE	FALSE	FALSE	FALSE	FALSE	FALSE	FALSE	FALSE	.	not annotated	0.578944	rs28601761	8	126500031	G	C	0	rs28601761	444.248	TRUE	TC	114.189	TRUE	Total.Cholesterol	262.661	TRUE	Triglycerides.in.IDL	.	.	.	262.661	TRUE	Triglycerides.in.IDL	309.54	TRUE	Citrate / Concentration.of.VLDL.Particles	.	.	.	160.518	Cholesteryl esters to total lipids ratio in medium HDL	204.291	Cholesteryl.Esters.in.Medium.HDL / Concentration.of.Medium.HDL.Particles	148.473	0
8:126500031:C:G	23	1274	.	duplicate model	FALSE	FALSE	FALSE	FALSE	FALSE	FALSE	FALSE	FALSE	.	not annotated	.	rs28601761	8	126500031	G	C	.	.	437.49	TRUE	nonHDL	.	.	.	.	.	.	.	.	.	.	.	.	.	.	.	.	.	.	.	.	.	.	.	.
16:56994528:C:T	24	1990	CETP,AC012181.1-CETP,AC012181.1	r2 = 0.996 with rs821840	FALSE	FALSE	FALSE	FALSE	FALSE	FALSE	FALSE	FALSE	.	not annotated	0.675882	rs17231506	16	56994528	T	C	0	rs17231506	415.106	TRUE	HDL	1196.83	TRUE	HDL.Cholesterol	1330.96	TRUE	Cholesteryl.Esters.in.Large.HDL	.	.	.	1330.96	TRUE	Cholesteryl.Esters.in.Large.HDL	1865.87	TRUE	Cholesteryl.Esters.in.Small.VLDL / Phospholipids.in.Small.VLDL	.	.	.	932.541	Triglycerides to total lipids ratio in large VLDL	1435.39	Cholesteryl.Esters.in.Small.VLDL / Phospholipids.in.Small.VLDL	134.128	0
16:56991363:C:T	25	1984	.	duplicate model	FALSE	FALSE	FALSE	FALSE	FALSE	FALSE	FALSE	FALSE	.	not annotated	.	rs183130	16	56991363	T	C	.	.	404.361	TRUE	HDL	.	.	.	.	.	.	.	.	.	.	.	.	.	.	.	.	.	.	.	.	.	.	.	.
11:116648917:G:C	26	1587	.	duplicate model	FALSE	FALSE	FALSE	FALSE	FALSE	FALSE	FALSE	FALSE	.	not annotated	.	rs964184	11	116648917	C	G	.	.	403.61	TRUE	TC	.	.	.	.	.	.	.	.	.	.	.	.	.	.	.	.	.	.	.	.	.	.	.	.
5:74656539:T:C	27	752	CTD-2235C13.3,HMGCR	r2 = 1 with rs12916	FALSE	FALSE	FALSE	FALSE	FALSE	FALSE	FALSE	FALSE	.	not annotated	0.60029	rs12916	5	74656539	C	T	0	rs12916	400.635	TRUE	LDL	135.134	TRUE	Clinical.LDL.Cholesterol	169.616	TRUE	Cholesteryl.Esters.in.Medium.VLDL	.	.	.	169.616	TRUE	Cholesteryl.Esters.in.Medium.VLDL	213.648	TRUE	Free.Cholesterol.in.Small.HDL / Total.Cholesterol	.	.	.	84.1012	Phospholipids to total lipids ratio in large HDL	151.939	Triglycerides.in.Small.HDL / Phospholipids.in.VLDL	34.4827	0
11:116648917:G:C	28	1583	.	duplicate model	FALSE	FALSE	FALSE	FALSE	FALSE	FALSE	FALSE	FALSE	.	not annotated	.	rs964184	11	116648917	C	G	.	.	372.315	TRUE	HDL	.	.	.	.	.	.	.	.	.	.	.	.	.	.	.	.	.	.	.	.	.	.	.	.
5:74656539:T:C	29	754	.	duplicate model	FALSE	FALSE	FALSE	FALSE	FALSE	FALSE	FALSE	FALSE	.	not annotated	.	rs12916	5	74656539	C	T	.	.	350.725	TRUE	TC	.	.	.	.	.	.	.	.	.	.	.	.	.	.	.	.	.	.	.	.	.	.	.	.
8:126500031:C:G	30	1272	.	duplicate model	FALSE	FALSE	FALSE	FALSE	FALSE	FALSE	FALSE	FALSE	.	not annotated	.	rs28601761	8	126500031	G	C	.	.	341.035	TRUE	LDL	.	.	.	.	.	.	.	.	.	.	.	.	.	.	.	.	.	.	.	.	.	.	.	.
19:45412079:C:T	31	2393	.	duplicate model	FALSE	FALSE	FALSE	FALSE	FALSE	FALSE	FALSE	FALSE	.	not annotated	.	rs7412	19	45412079	T	C	.	.	340.029	TRUE	TC	.	.	.	.	.	.	.	.	.	.	.	.	.	.	.	.	.	.	.	.	.	.	.	.
1:62957030:G:A	32	100	DOCK7	r2 = 0.995 with rs598253	FALSE	FALSE	FALSE	FALSE	FALSE	FALSE	FALSE	FALSE	.	not annotated	0.6451	rs10889333	1	62957030	A	G	0	rs10889333	335.427	TRUE	logTG	173.368	TRUE	Total.Triglycerides	275.468	TRUE	Polyunsaturated.Fatty.Acids	.	.	.	275.468	TRUE	Polyunsaturated.Fatty.Acids	321.542	TRUE	Albumin / Polyunsaturated.Fatty.Acids	.	.	.	160.611	Cholesteryl esters to total lipids ratio in small LDL	238.156	Free.Cholesterol.in.Small.LDL / LDL.Cholesterol	102.101	0
1:55529215:C:A	33	71	USP24,PCSK9	MAF<1%	FALSE	FALSE	FALSE	FALSE	FALSE	FALSE	FALSE	FALSE	.	not annotated	0.999996	rs28362286	1	55529215	A	C	0	rs28362286	335.007	TRUE	LDL	0.780419	FALSE	Clinical.LDL.Cholesterol	3.16141	FALSE	Creatinine	.	.	.	3.16141	FALSE	Creatinine	3.24228	FALSE	Creatinine / Average.Diameter.for.VLDL.Particles	.	.	.	0.360618	Cholesteryl esters to total lipids ratio in very large HDL	1.19141	Cholesteryl.Esters.in.Large.HDL / Concentration.of.Very.Large.HDL.Particles	2.38099	0
19:45413233:G:T	34	2404	.	duplicate model	FALSE	FALSE	FALSE	FALSE	FALSE	FALSE	FALSE	FALSE	.	not annotated	.	rs1065853	19	45413233	T	G	.	.	319.592	TRUE	nonHDL	.	.	.	.	.	.	.	.	.	.	.	.	.	.	.	.	.	.	.	.	.	.	.	.
19:45413233:G:T	35	2405	.	duplicate model	FALSE	FALSE	FALSE	FALSE	FALSE	FALSE	FALSE	FALSE	.	not annotated	.	rs1065853	19	45413233	T	G	.	.	313.273	TRUE	TC	.	.	.	.	.	.	.	.	.	.	.	.	.	.	.	.	.	.	.	.	.	.	.	.
18:46545976:G:C	36	2221	RP11-15F12.1,RP11-1058N17.1-RP11-15F12.1	r2 = 1 with rs538969346	FALSE	FALSE	FALSE	FALSE	FALSE	FALSE	FALSE	FALSE	.	not annotated	0.990503	rs538969346	18	46545976	C	G	1	rs538969346+rs77960347	310.762	TRUE	TC	0.852482	FALSE	Total.Cholesterol	1.12928	FALSE	Average.Diameter.for.LDL.Particles	.	.	.	1.78395	FALSE	Free cholesterol to total lipids ratio in chylomicrons and extremely large VLDL	2.62536	FALSE	Omega.6.Fatty.Acids / Total.Lipids.in.Lipoprotein.Particles	.	.	.	1.00093	Free cholesterol to total lipids ratio in chylomicrons and extremely large VLDL	1.60766	Omega.6.Fatty.Acids / Total.Lipids.in.Lipoprotein.Particles	0.276802	0.654662
1:55505647:G:T	37	62	PCSK9	r2 = 1 with rs11591147	FALSE	FALSE	FALSE	FALSE	FALSE	FALSE	FALSE	FALSE	.	not annotated	0.982496	rs11591147	1	55505647	T	G	1	rs11591147+rs12740374	302	TRUE	LDL	318.938	TRUE	Clinical.LDL.Cholesterol	387.485	TRUE	Cholesteryl.Esters.in.Medium.VLDL	.	.	.	387.485	TRUE	Cholesteryl.Esters.in.Medium.VLDL	460.309	TRUE	Concentration.of.Small.HDL.Particles / Phospholipids.in.Large.LDL	.	.	.	182.523	Triglycerides to total lipids ratio in small VLDL	276.948	Triglycerides.in.Small.VLDL / Phospholipids.in.VLDL	68.5473	0
1:55505647:G:T	38	63	.	duplicate model	FALSE	FALSE	FALSE	FALSE	FALSE	FALSE	FALSE	FALSE	.	not annotated	.	rs11591147	1	55505647	T	G	.	.	302	TRUE	nonHDL	.	.	.	.	.	.	.	.	.	.	.	.	.	.	.	.	.	.	.	.	.	.	.	.
1:55505647:G:T	39	64	.	duplicate model	FALSE	FALSE	FALSE	FALSE	FALSE	FALSE	FALSE	FALSE	.	not annotated	.	rs11591147	1	55505647	T	G	.	.	302	TRUE	TC	.	.	.	.	.	.	.	.	.	.	.	.	.	.	.	.	.	.	.	.	.	.	.	.
1:62992749:T:C	40	103	DOCK7,RP11-293K19.1	r2 = 0.986 with rs598253	FALSE	FALSE	FALSE	FALSE	FALSE	FALSE	FALSE	FALSE	.	not annotated	0.645363	rs11207980	1	62992749	C	T	2	rs11207980+rs12740374+rs11591147	302	TRUE	TC	86.9723	TRUE	Total.Cholesterol	277.155	TRUE	Polyunsaturated.Fatty.Acids	.	.	.	277.155	TRUE	Polyunsaturated.Fatty.Acids	325.033	TRUE	Albumin / Polyunsaturated.Fatty.Acids	.	.	.	159.495	Cholesteryl esters to total lipids ratio in small LDL	235.433	Free.Cholesterol.in.Small.LDL / LDL.Cholesterol	190.183	0
2:21231524:G:A	41	279	APOB	primary	TRUE	TRUE	TRUE	TRUE	TRUE	TRUE	TRUE	TRUE	APOB100	P2739L variant, major constituent of chylomicrons (apo B-48), LDL (apo B-100) and VLDL (apo B-100)	0.796689	rs676210	2	21231524	A	G	1	rs676210+rs1260326	302	TRUE	logTG	175.329	TRUE	Total.Triglycerides	310.952	TRUE	Concentration.of.Small.VLDL.Particles	39.1246	TRUE	1	310.952	TRUE	Concentration.of.Small.VLDL.Particles	563.711	TRUE	Free.Cholesterol.in.Small.VLDL / Phospholipids.in.LDL	77.8518	TRUE	1	275.658	Phospholipids to total lipids ratio in IDL	370.05	Total.Esterified.Cholesterol / Total.Cholesterol	135.624	0
2:27730940:T:C	42	344	GCKR	r2 = 1 with rs1260326	FALSE	FALSE	FALSE	FALSE	FALSE	FALSE	FALSE	FALSE	.	not annotated	0.392023	rs1260326	2	27730940	C	T	2	rs1260326+rs934197+rs4299376	302	TRUE	TC	63.7518	TRUE	Total.Cholesterol	331.218	TRUE	Monounsaturated.Fatty.Acids	.	.	.	331.218	TRUE	Monounsaturated.Fatty.Acids	487.668	TRUE	Glutamine / Total.Fatty.Acids	.	.	.	177.886	Free cholesterol to total lipids ratio in large LDL	222.741	Free.Cholesterol.in.Medium.HDL / Cholesteryl.Esters.in.HDL	267.466	0
2:44072576:G:T	43	366	ABCG8	primary	TRUE	TRUE	TRUE	TRUE	TRUE	TRUE	FALSE	TRUE	ABCG8	selective transport of dietary cholesterol in and out of the enterocytes; selective sterol excretion by the liver into bile	0.322674	rs4299376	2	44072576	T	G	1	rs4299376+rs934197	302	TRUE	LDL	94.6946	TRUE	Clinical.LDL.Cholesterol	107.173	TRUE	Cholesteryl.Esters.in.Medium.VLDL	16.3211	TRUE	1	107.173	TRUE	Cholesteryl.Esters.in.Medium.VLDL	136.22	TRUE	Free.Cholesterol.in.Small.HDL / Total.Cholesterol	22.722	TRUE	1	50.1144	Phospholipids to total lipids ratio in large HDL	82.7568	Triglycerides.in.Small.HDL / Phospholipids.in.VLDL	12.4788	0
2:44072576:G:T	44	367	.	duplicate model	FALSE	FALSE	FALSE	FALSE	FALSE	FALSE	FALSE	FALSE	.	not annotated	.	rs4299376	2	44072576	T	G	.	.	302	TRUE	nonHDL	.	.	.	.	.	.	.	.	.	.	.	.	.	.	.	.	.	.	.	.	.	.	.	.
2:44072576:G:T	45	368	.	duplicate model	FALSE	FALSE	FALSE	FALSE	FALSE	FALSE	FALSE	FALSE	.	not annotated	.	rs4299376	2	44072576	T	G	.	.	302	TRUE	TC	.	.	.	.	.	.	.	.	.	.	.	.	.	.	.	.	.	.	.	.	.	.	.	.
4:110095620:T:C	46	692	COL25A1	r2 = 0.731 with rs114816312	FALSE	FALSE	FALSE	FALSE	FALSE	FALSE	FALSE	FALSE	.	not annotated	0.992946	rs138307849	4	110095620	C	T	3	rs138307849+rs13107325+rs2167750+rs114816312	302	TRUE	HDL	0.288719	FALSE	HDL.Cholesterol	1.14319	FALSE	Glutamine	.	.	.	1.23513	FALSE	Free cholesterol to total lipids ratio in IDL	2.23053	FALSE	Triglycerides.in.Very.Large.VLDL / Cholesterol.in.Chylomicrons.and.Extremely.Large.VLDL	.	.	.	0.835674	Free cholesterol to total lipids ratio in IDL	2.03212	Triglycerides.in.Very.Large.VLDL / Cholesterol.in.Chylomicrons.and.Extremely.Large.VLDL	0.854472	0.091937
4:110095620:T:C	47	693	COL25A1	r2 = 0.731 with rs114816312	FALSE	FALSE	FALSE	FALSE	FALSE	FALSE	FALSE	FALSE	.	not annotated	0.992946	rs138307849	4	110095620	C	T	4	rs138307849+rs13108218+rs17605615+rs114816312+rs13107325	302	TRUE	logTG	0.0105772	FALSE	Total.Triglycerides	1.14803	FALSE	Glutamine	.	.	.	1.22392	FALSE	Free cholesterol to total lipids ratio in IDL	2.22832	FALSE	Triglycerides.in.Very.Large.VLDL / Cholesterol.in.Chylomicrons.and.Extremely.Large.VLDL	.	.	.	0.817166	Free cholesterol to total lipids ratio in IDL	2.01535	Triglycerides.in.Very.Large.VLDL / Cholesterol.in.Chylomicrons.and.Extremely.Large.VLDL	1.13745	0.0758951
8:126500031:C:G	48	1273	RP11-136O12.2	primary	TRUE	TRUE	TRUE	TRUE	TRUE	TRUE	TRUE	FALSE	.	.	0.578944	rs28601761	8	126500031	G	C	1	rs28601761+rs328	302	TRUE	logTG	216.085	TRUE	Total.Triglycerides	263.293	TRUE	Triglycerides.in.IDL	26.3501	TRUE	1	263.293	TRUE	Triglycerides.in.IDL	310.283	TRUE	Citrate / Concentration.of.VLDL.Particles	36.8134	TRUE	1	161.465	Cholesteryl esters to total lipids ratio in medium HDL	205.074	Cholesteryl.Esters.in.Medium.HDL / Concentration.of.Medium.HDL.Particles	47.2077	0
11:117220429:A:C	49	1610	CEP164	MAF<1%	FALSE	FALSE	FALSE	FALSE	FALSE	FALSE	FALSE	FALSE	.	not annotated	0.998978	rs192489212	11	117220429	C	A	1	rs192489212+rs964184	302	TRUE	logTG	84.5592	TRUE	Total.Triglycerides	98.7379	TRUE	Cholesterol.in.Chylomicrons.and.Extremely.Large.VLDL	.	.	.	105.794	TRUE	Inverse Ratio of triglycerides to phosphoglycerides	109.872	TRUE	Cholesterol.in.IDL / Concentration.of.VLDL.Particles	.	.	.	73.624	Free cholesterol to total lipids ratio in medium LDL	91.3292	Free.Cholesterol.in.Large.LDL / Total.Cholesterol.Minus.HDL.C	14.1787	7.05577
19:8429323:G:A	50	2270	ANGPTL4	r2 = 1 with rs116843064	FALSE	FALSE	FALSE	FALSE	FALSE	FALSE	FALSE	FALSE	.	not annotated	0.98062	rs116843064	19	8429323	A	G	1	rs116843064+rs429358	302	TRUE	HDL	90.0676	TRUE	HDL.Cholesterol	135.804	TRUE	Triglycerides.in.Small.VLDL	.	.	.	175.325	TRUE	Triglycerides to total lipids ratio in large HDL	196.427	TRUE	Triglycerides.in.IDL / Triglycerides.in.Very.Small.VLDL	.	.	.	120.888	Free cholesterol to total lipids ratio in medium LDL	137.695	Cholesteryl.Esters.in.LDL / LDL.Cholesterol	45.7362	39.5214
19:8429323:G:A	51	2271	ANGPTL4	r2 = 1 with rs116843064	FALSE	FALSE	FALSE	FALSE	FALSE	FALSE	FALSE	FALSE	.	not annotated	0.98062	rs116843064	19	8429323	A	G	1	rs116843064+rs483082	302	TRUE	logTG	106.231	TRUE	Total.Triglycerides	135.244	TRUE	Triglycerides.in.Small.VLDL	.	.	.	174.477	TRUE	Triglycerides to total lipids ratio in large HDL	194.89	TRUE	Triglycerides.in.IDL / Triglycerides.in.Very.Small.VLDL	.	.	.	119.618	Free cholesterol to total lipids ratio in medium LDL	136.549	Cholesteryl.Esters.in.LDL / LDL.Cholesterol	29.0136	39.2327
19:11197598:G:T	52	2297	SMARCA4-LDLR,LDLR	primary	TRUE	TRUE	TRUE	TRUE	TRUE	TRUE	TRUE	TRUE	LDLR	major LDL receptor; binds LDL and transports it into cells by endocytosis	0.880995	rs73015024	19	11197598	T	G	1	rs73015024+rs7412	302	TRUE	LDL	500.419	TRUE	Clinical.LDL.Cholesterol	592.769	TRUE	Cholesteryl.Esters.in.Medium.VLDL	91.0042	TRUE	1	592.769	TRUE	Cholesteryl.Esters.in.Medium.VLDL	721.137	TRUE	Cholesterol.in.Small.HDL / Free.Cholesterol.in.Large.LDL	117.236	TRUE	1	264.271	Triglycerides to total lipids ratio in small VLDL	429.062	Triglycerides.in.Small.VLDL / Phospholipids.in.VLDL	92.3495	0
19:11197598:G:T	53	2298	.	duplicate model	FALSE	FALSE	FALSE	FALSE	FALSE	FALSE	FALSE	FALSE	.	not annotated	.	rs73015024	19	11197598	T	G	.	.	302	TRUE	nonHDL	.	.	.	.	.	.	.	.	.	.	.	.	.	.	.	.	.	.	.	.	.	.	.	.
19:11197598:G:T	54	2299	.	duplicate model	FALSE	FALSE	FALSE	FALSE	FALSE	FALSE	FALSE	FALSE	.	not annotated	.	rs73015024	19	11197598	T	G	.	.	302	TRUE	TC	.	.	.	.	.	.	.	.	.	.	.	.	.	.	.	.	.	.	.	.	.	.	.	.
19:19379549:C:T	55	2338	AC138430.4,TM6SF2	r2 = 1 with rs58542926	FALSE	FALSE	FALSE	FALSE	FALSE	FALSE	FALSE	FALSE	.	not annotated	0.924107	rs58542926	19	19379549	T	C	2	rs58542926+rs7412+rs73015024	302	TRUE	LDL	104.615	TRUE	Clinical.LDL.Cholesterol	233.779	TRUE	Omega.3.Fatty.Acids	.	.	.	233.779	TRUE	Omega.3.Fatty.Acids	263.096	TRUE	Albumin / Omega.3.Fatty.Acids	.	.	.	25.8805	Cholesteryl esters to total lipids ratio in medium HDL	88.6598	Phospholipids.in.Small.VLDL / Phospholipids.in.Medium.VLDL	129.165	0
19:19379549:C:T	56	2339	AC138430.4,TM6SF2	r2 = 1 with rs58542926	FALSE	FALSE	FALSE	FALSE	FALSE	FALSE	FALSE	FALSE	.	not annotated	0.924107	rs58542926	19	19379549	T	C	2	rs58542926+rs483082+rs116843064	302	TRUE	logTG	84.3514	TRUE	Total.Triglycerides	233.941	TRUE	Omega.3.Fatty.Acids	.	.	.	233.941	TRUE	Omega.3.Fatty.Acids	263.298	TRUE	Albumin / Omega.3.Fatty.Acids	.	.	.	25.4175	Cholesteryl esters to total lipids ratio in medium HDL	85.076	Phospholipids.in.Small.VLDL / Phospholipids.in.Medium.VLDL	149.59	0
19:19379549:C:T	57	2340	.	duplicate model	FALSE	FALSE	FALSE	FALSE	FALSE	FALSE	FALSE	FALSE	.	not annotated	.	rs58542926	19	19379549	T	C	.	.	302	TRUE	nonHDL	.	.	.	.	.	.	.	.	.	.	.	.	.	.	.	.	.	.	.	.	.	.	.	.
19:19379549:C:T	58	2341	.	duplicate model	FALSE	FALSE	FALSE	FALSE	FALSE	FALSE	FALSE	FALSE	.	not annotated	.	rs58542926	19	19379549	T	C	.	.	302	TRUE	TC	.	.	.	.	.	.	.	.	.	.	.	.	.	.	.	.	.	.	.	.	.	.	.	.
19:46018119:G:A	59	2417	VASP	r2 = 0.725 with rs540662190	FALSE	FALSE	FALSE	FALSE	FALSE	FALSE	FALSE	FALSE	.	not annotated	0.984729	rs7255743	19	46018119	A	G	3	rs7255743+rs7412+rs73015024+rs58542926	302	TRUE	nonHDL	0.257836	FALSE	Total.Cholesterol.Minus.HDL.C	2.70207	FALSE	Acetone	.	.	.	2.70207	FALSE	Acetone	3.46145	FALSE	Free.Cholesterol.in.Large.VLDL / Cholesterol.in.Very.Large.VLDL	.	.	.	1.12894	Phospholipids to total lipids ratio in IDL	3.0175	Free.Cholesterol.in.Large.VLDL / Cholesterol.in.Very.Large.VLDL	2.44423	0
19:46018119:G:A	60	2418	.	duplicate model	FALSE	FALSE	FALSE	FALSE	FALSE	FALSE	FALSE	FALSE	.	not annotated	.	rs7255743	19	46018119	A	G	.	.	302	TRUE	TC	.	.	.	.	.	.	.	.	.	.	.	.	.	.	.	.	.	.	.	.	.	.	.	.
8:9183358:A:G	61	1148	RP11-115J16.1	r2 = 0.994 with rs111675407	FALSE	FALSE	FALSE	FALSE	FALSE	FALSE	FALSE	FALSE	.	not annotated	0.092348	rs9987289	8	9183358	G	A	1	rs9987289+rs15285	301.824	TRUE	HDL	89.9201	TRUE	HDL.Cholesterol	157.725	TRUE	Glycine	.	.	.	157.725	TRUE	Glycine	274.505	TRUE	Glycine / Cholesteryl.Esters.in.HDL	.	.	.	53.7351	Phospholipids to total lipids ratio in very small VLDL	116.78	Glycine / Cholesteryl.Esters.in.HDL	67.8048	0
6:161010118:A:G	62	1011	LPA	primary	TRUE	TRUE	TRUE	TRUE	TRUE	TRUE	TRUE	TRUE	LPA	Apo(a) is the main constituent of lipoprotein(a)	0.918739	rs10455872	6	161010118	G	A	0	rs10455872	281.413	TRUE	LDL	15.4206	TRUE	Clinical.LDL.Cholesterol	573.759	TRUE	Triglycerides.in.Chylomicrons.and.Extremely.Large.VLDL	58.0422	TRUE	1	573.759	TRUE	Triglycerides.in.Chylomicrons.and.Extremely.Large.VLDL	790.823	TRUE	Cholesterol.in.Large.VLDL / Triglycerides.in.Chylomicrons.and.Extremely.Large.VLDL	82.2292	TRUE	1	308.377	Cholesteryl esters to total lipids ratio in large VLDL	602.826	Triglycerides.in.Large.LDL / Triglycerides.in.LDL	558.338	0
9:136141870:C:T	63	1374	ABO	primary	TRUE	TRUE	TRUE	TRUE	TRUE	TRUE	TRUE	TRUE	ABO	ABO blood type; pleiotropic locus	0.814956	rs2519093	9	136141870	T	C	0	rs2519093	278.143	TRUE	LDL	98.8076	TRUE	Clinical.LDL.Cholesterol	111.178	TRUE	Cholesteryl.Esters.in.Medium.VLDL	17.97	TRUE	1	126.909	TRUE	Cholesterol to total lipids ratio in large VLDL	142.83	TRUE	Triglycerides.in.Small.LDL / Cholesteryl.Esters.in.Small.VLDL	20.9231	TRUE	1	117.665	Cholesterol to total lipids ratio in large VLDL	119.357	Cholesterol.in.Large.VLDL / Triglycerides.in.VLDL	12.3707	15.7305
17:41926126:C:T	64	2132	CD300LG	primary	TRUE	TRUE	TRUE	TRUE	TRUE	TRUE	TRUE	TRUE	CD300LG	polymorphism in this gene affects HDL-TG content and particle size during fasting	0.968354	rs72836561	17	41926126	T	C	0	rs72836561	274.485	TRUE	HDL	110.85	TRUE	HDL.Cholesterol	112.865	TRUE	Cholesteryl.Esters.in.HDL	19.6751	TRUE	1	112.865	TRUE	Cholesteryl.Esters.in.HDL	135.753	TRUE	Triglycerides.in.Small.VLDL / Saturated.Fatty.Acids	16.9247	TRUE	1	60.8836	Cholesteryl esters to total lipids ratio in very small VLDL	93.0439	Concentration.of.Small.LDL.Particles / Total.Lipids.in.IDL	2.016	0
1:55529215:C:A	65	73	.	duplicate model	FALSE	FALSE	FALSE	FALSE	FALSE	FALSE	FALSE	FALSE	.	not annotated	.	rs28362286	1	55529215	A	C	.	.	273.997	TRUE	TC	.	.	.	.	.	.	.	.	.	.	.	.	.	.	.	.	.	.	.	.	.	.	.	.
11:61585144:A:G	66	1533	FADS2,MIR1908,FADS1	r2 = 0.982 with rs174564	FALSE	FALSE	FALSE	FALSE	FALSE	FALSE	FALSE	FALSE	.	not annotated	0.653473	rs174562	11	61585144	G	A	2	rs174562+rs964184+rs192489212	273.126	TRUE	logTG	40.9237	TRUE	Total.Triglycerides	2990.85	TRUE	Omega.3.Fatty.Acids	.	.	.	4053.82	TRUE	Ratio of omega-3 fatty acids to total fatty acids	5029.94	TRUE	Linoleic.Acid / Polyunsaturated.Fatty.Acids	.	.	.	1062.97	Ratio of omega-3 fatty acids to total fatty acids	4749.77	Linoleic.Acid / Polyunsaturated.Fatty.Acids	2949.93	1062.97
1:62957030:G:A	67	101	DOCK7	r2 = 0.995 with rs598253	FALSE	FALSE	FALSE	FALSE	FALSE	FALSE	FALSE	FALSE	.	not annotated	0.6451	rs10889333	1	62957030	A	G	2	rs10889333+rs12740374+rs11591147	266.55	TRUE	nonHDL	87.9526	TRUE	Total.Cholesterol.Minus.HDL.C	277.504	TRUE	Polyunsaturated.Fatty.Acids	.	.	.	277.504	TRUE	Polyunsaturated.Fatty.Acids	323.887	TRUE	Albumin / Polyunsaturated.Fatty.Acids	.	.	.	158.738	Cholesteryl esters to total lipids ratio in small LDL	236.428	Free.Cholesterol.in.Small.LDL / LDL.Cholesterol	189.551	0
5:74656539:T:C	68	753	.	duplicate model	FALSE	FALSE	FALSE	FALSE	FALSE	FALSE	FALSE	FALSE	.	not annotated	.	rs12916	5	74656539	C	T	.	.	260.54	TRUE	nonHDL	.	.	.	.	.	.	.	.	.	.	.	.	.	.	.	.	.	.	.	.	.	.	.	.
11:116662579:C:T	69	1595	ZNF259,APOA5	r2 = 0.999 with rs662799	FALSE	FALSE	FALSE	FALSE	FALSE	FALSE	FALSE	FALSE	.	not annotated	0.0584718	rs651821	11	116662579	T	C	0	rs651821	259.057	TRUE	HDL	54.2145	TRUE	HDL.Cholesterol	443.243	TRUE	Triglycerides.in.Small.VLDL	.	.	.	443.243	TRUE	Triglycerides.in.Small.VLDL	479.606	TRUE	Triglycerides.in.Small.VLDL / Valine	.	.	.	289.331	Free cholesterol to total lipids ratio in large LDL	373.81	Free.Cholesterol.in.LDL / LDL.Cholesterol	389.029	0
19:45411941:T:C	70	2392	TOMM40,APOE	primary	TRUE	TRUE	TRUE	TRUE	TRUE	TRUE	TRUE	FALSE	APOE (2)	secondary association with LPmtr gene	0.84309	rs429358	19	45411941	C	T	0	rs429358	255.233	TRUE	HDL	10.9158	TRUE	HDL.Cholesterol	1074.16	TRUE	Phospholipids.in.Small.LDL	168.965	TRUE	1	1074.16	TRUE	Phospholipids.in.Small.LDL	1221.14	TRUE	Phospholipids.in.Small.HDL / Phospholipids.in.LDL	199.743	TRUE	1	578.039	Free cholesterol to total lipids ratio in small HDL	819.663	Free.Cholesterol.in.Small.HDL / Phospholipids.in.Small.HDL	1063.25	0
9:136141870:C:T	71	1375	.	duplicate model	FALSE	FALSE	FALSE	FALSE	FALSE	FALSE	FALSE	FALSE	.	not annotated	.	rs2519093	9	136141870	T	C	.	.	247.563	TRUE	TC	.	.	.	.	.	.	.	.	.	.	.	.	.	.	.	.	.	.	.	.	.	.	.	.
9:107661742:A:C	72	1341	ABCA1	primary	TRUE	TRUE	TRUE	TRUE	TRUE	TRUE	TRUE	TRUE	ABCA1	involved in the efflux of intracellular cholesterol and phospholipids and their transfer to apoliproteins to form nascent high density lipoproteins/HDLs.	0.73678	rs2740488	9	107661742	C	A	0	rs2740488	245.662	TRUE	HDL	55.6446	TRUE	HDL.Cholesterol	109.345	TRUE	Triglycerides.in.Large.HDL	11.8583	TRUE	1	109.345	TRUE	Triglycerides.in.Large.HDL	193.558	TRUE	Triglycerides.in.Very.Large.HDL / Triglycerides.in.Very.Small.VLDL	22.0737	TRUE	1	54.4571	Free cholesterol to total lipids ratio in small HDL	98.4528	Triglycerides.in.Very.Large.HDL / Triglycerides.in.Very.Small.VLDL	53.7003	0
19:11191729:C:T	73	2292	SMARCA4-LDLR	r2 = 0.998 with rs73015024	FALSE	FALSE	FALSE	FALSE	FALSE	FALSE	FALSE	FALSE	.	not annotated	0.881068	rs138294113	19	11191729	T	C	1	rs138294113+rs7412	243.963	TRUE	LDL	496.965	TRUE	Clinical.LDL.Cholesterol	589.568	TRUE	Cholesteryl.Esters.in.Medium.VLDL	.	.	.	589.568	TRUE	Cholesteryl.Esters.in.Medium.VLDL	717.289	TRUE	Cholesterol.in.Small.HDL / Free.Cholesterol.in.Large.LDL	.	.	.	262.818	Free cholesterol to total lipids ratio in large HDL	426.848	Triglycerides.in.Small.VLDL / Phospholipids.in.VLDL	92.6029	0
15:58723479:T:C	74	1921	RP11-355N15.1,LIPC,ALDH1A2	r2 = 0.997 with rs1077835	FALSE	FALSE	FALSE	FALSE	FALSE	FALSE	FALSE	FALSE	.	not annotated	0.781281	rs1077834	15	58723479	C	T	0	rs1077834	243.689	TRUE	TC	175.791	TRUE	Total.Cholesterol	1912.03	TRUE	Triglycerides.in.Large.HDL	.	.	.	1912.03	TRUE	Triglycerides.in.Large.HDL	2438	TRUE	Free.Cholesterol.in.Small.HDL / Concentration.of.Small.HDL.Particles	.	.	.	1392.63	Free cholesterol to total lipids ratio in small HDL	2313.32	Free.Cholesterol.in.Small.HDL / Concentration.of.Small.HDL.Particles	1736.24	0
2:27730940:T:C	75	343	.	duplicate model	FALSE	FALSE	FALSE	FALSE	FALSE	FALSE	FALSE	FALSE	.	not annotated	.	rs1260326	2	27730940	C	T	.	.	240.313	TRUE	nonHDL	.	.	.	.	.	.	.	.	.	.	.	.	.	.	.	.	.	.	.	.	.	.	.	.
9:107661742:A:C	76	1344	ABCA1	r2 = 1 with rs2740488	FALSE	FALSE	FALSE	FALSE	FALSE	FALSE	FALSE	FALSE	.	not annotated	0.73678	rs2740488	9	107661742	C	A	1	rs2740488+rs2519093	240.169	TRUE	TC	51.9136	TRUE	Total.Cholesterol	109.308	TRUE	Triglycerides.in.Large.HDL	.	.	.	109.308	TRUE	Triglycerides.in.Large.HDL	193.868	TRUE	Triglycerides.in.Very.Large.HDL / Triglycerides.in.Very.Small.VLDL	.	.	.	54.6232	Free cholesterol to total lipids ratio in small HDL	98.7371	Triglycerides.in.Very.Large.HDL / Triglycerides.in.Very.Small.VLDL	57.3949	0
8:9183358:A:G	77	1150	RP11-115J16.1	r2 = 0.994 with rs111675407	FALSE	FALSE	FALSE	FALSE	FALSE	FALSE	FALSE	FALSE	.	not annotated	0.092348	rs9987289	8	9183358	G	A	1	rs9987289+rs28601761	237.827	TRUE	TC	65.6963	TRUE	Total.Cholesterol	158.899	TRUE	Glycine	.	.	.	158.899	TRUE	Glycine	275.394	TRUE	Glycine / Cholesteryl.Esters.in.HDL	.	.	.	53.6573	Phospholipids to total lipids ratio in very small VLDL	116.495	Glycine / Cholesteryl.Esters.in.HDL	93.2027	0
11:117220429:A:C	78	1609	.	duplicate model	FALSE	FALSE	FALSE	FALSE	FALSE	FALSE	FALSE	FALSE	.	not annotated	.	rs192489212	11	117220429	C	A	.	.	233.179	TRUE	HDL	.	.	.	.	.	.	.	.	.	.	.	.	.	.	.	.	.	.	.	.	.	.	.	.
20:44569930:C:T	79	2522	PCIF1	primary	TRUE	TRUE	TRUE	TRUE	TRUE	TRUE	TRUE	TRUE	PLTP	mediates transfer of PL from other lipoproteins to high density lipoproteins	0.813534	rs6065908	20	44569930	T	C	1	rs6065908+rs1800961	231.68	TRUE	HDL	94.4355	TRUE	HDL.Cholesterol	941.667	TRUE	Phospholipids.in.Very.Large.HDL	155.897	TRUE	1	941.667	TRUE	Phospholipids.in.Very.Large.HDL	1129.2	TRUE	Cholesteryl.Esters.in.Medium.HDL / Phospholipids.in.Very.Large.HDL	184.644	TRUE	1	321.684	Free cholesterol to total lipids ratio in large HDL	868.445	Free.Cholesterol.in.Small.HDL / Total.Cholines	847.231	0
11:116623213:TA:T	80	1580	BUD13	r2 = 0.905 with rs964184	FALSE	FALSE	FALSE	FALSE	FALSE	FALSE	FALSE	FALSE	.	not annotated	0.139202	rs398017699	11	116623213	T	TA	0	rs398017699	230.316	TRUE	logTG	678.585	TRUE	Total.Triglycerides	773.202	TRUE	Triglycerides.in.Small.VLDL	.	.	.	773.202	TRUE	Triglycerides.in.Small.VLDL	877.087	TRUE	Polyunsaturated.Fatty.Acids / Sphingomyelins	.	.	.	486.793	Free cholesterol to total lipids ratio in small LDL	642.482	Free.Cholesterol.in.LDL / LDL.Cholesterol	94.6173	0
16:67940350:A:G	81	2003	PSKH1	r2 = 0.966 with rs56374641	FALSE	FALSE	FALSE	FALSE	FALSE	FALSE	FALSE	FALSE	.	not annotated	0.884653	rs55781197	16	67940350	G	A	1	rs55781197+rs183130	224.967	TRUE	HDL	18.6051	TRUE	HDL.Cholesterol	21.7649	TRUE	Cholesteryl.Esters.in.HDL	.	.	.	37.3505	TRUE	Phospholipids to total lipids ratio in medium HDL	47.1907	TRUE	Free.Cholesterol.in.Large.HDL / Concentration.of.Large.HDL.Particles	.	.	.	28.2364	Phospholipids to total lipids ratio in medium HDL	41.075	Total.Lipids.in.IDL / Total.Esterified.Cholesterol	3.15975	15.5856
16:56993886:A:G	82	1989	CETP,AC012181.1-CETP,AC012181.1	primary	TRUE	TRUE	TRUE	TRUE	TRUE	TRUE	TRUE	TRUE	CETP	involved in the transfer of cholesteryl ester from high density lipoprotein (HDL) to other lipoproteins	0.674973	rs821840	16	56993886	G	A	0	rs821840	223.284	TRUE	HDL	1202.14	TRUE	HDL.Cholesterol	1338.07	TRUE	Cholesteryl.Esters.in.Large.HDL	235.398	TRUE	1	1338.07	TRUE	Cholesteryl.Esters.in.Large.HDL	1875.29	TRUE	Cholesteryl.Esters.in.Small.VLDL / Phospholipids.in.Small.VLDL	328.394	TRUE	1	937.819	Triglycerides to total lipids ratio in large VLDL	1442.12	Cholesteryl.Esters.in.Small.VLDL / Phospholipids.in.Small.VLDL	135.925	0
6:161010118:A:G	83	1013	.	duplicate model	FALSE	FALSE	FALSE	FALSE	FALSE	FALSE	FALSE	FALSE	.	not annotated	.	rs10455872	6	161010118	G	A	.	.	220.279	TRUE	TC	.	.	.	.	.	.	.	.	.	.	.	.	.	.	.	.	.	.	.	.	.	.	.	.
18:47173181:A:G	84	2233	LIPG-SMUG1P1,SMUG1P1	r2 = 0.967 with rs4939883	FALSE	FALSE	FALSE	FALSE	FALSE	FALSE	FALSE	FALSE	.	not annotated	0.176685	rs1943977	18	47173181	G	A	0	rs1943977	219.405	TRUE	HDL	125.863	TRUE	HDL.Cholesterol	187.551	TRUE	Phospholipids.in.Medium.HDL	.	.	.	187.551	TRUE	Phospholipids.in.Medium.HDL	211.366	TRUE	Phospholipids.in.Small.LDL / Total.Free.Cholesterol	.	.	.	59.7809	Free cholesterol to total lipids ratio in very large HDL	166.968	Phospholipids.in.Small.LDL / Total.Free.Cholesterol	61.6883	0
11:116648917:G:C	85	1590	.	duplicate model	FALSE	FALSE	FALSE	FALSE	FALSE	FALSE	FALSE	FALSE	.	not annotated	.	rs964184	11	116648917	C	G	.	.	216.616	TRUE	logTG	.	.	.	.	.	.	.	.	.	.	.	.	.	.	.	.	.	.	.	.	.	.	.	.
19:54800500:A:G	86	2450	AC010518.3,LILRA3	r2 = 0.954 with rs1645788	FALSE	FALSE	FALSE	FALSE	FALSE	FALSE	FALSE	FALSE	.	not annotated	0.772781	rs367070	19	54800500	G	A	2	rs367070+rs429358+rs116843064	212.742	TRUE	HDL	19.8044	TRUE	HDL.Cholesterol	23.3307	TRUE	Concentration.of.HDL.Particles	.	.	.	39.3489	TRUE	Phospholipids to total lipids ratio in medium HDL	67.1659	TRUE	Free.Cholesterol.in.Large.HDL / Concentration.of.Large.HDL.Particles	.	.	.	27.0989	Phospholipids to total lipids ratio in medium HDL	55.0398	Free.Cholesterol.in.Large.HDL / Concentration.of.Large.HDL.Particles	3.5263	16.0181
17:67081278:A:G	87	2175	ABCA6	r2 = 1 with rs77542162	FALSE	FALSE	FALSE	FALSE	FALSE	FALSE	FALSE	FALSE	.	not annotated	0.976632	rs77542162	17	67081278	G	A	0	rs77542162	212.012	TRUE	LDL	59.2207	TRUE	Clinical.LDL.Cholesterol	117.145	TRUE	Cholesteryl.Esters.in.Very.Small.VLDL	.	.	.	117.849	TRUE	Phospholipids to total lipids ratio in medium VLDL	181.752	TRUE	Cholesteryl.Esters.in.Very.Small.VLDL / Albumin	.	.	.	86.113	Triglycerides to total lipids ratio in small VLDL	108.869	Triglycerides.in.Small.VLDL / Phospholipids.in.VLDL	57.9241	0.704072
11:61588305:A:G	88	1535	FADS2,FADS1	primary	TRUE	TRUE	TRUE	TRUE	TRUE	TRUE	TRUE	TRUE	FADS2	involved in biosynthesis of highly unsaturated fatty acids (HUFA) from the essential polyunsaturated fatty acids (PUFA) linoleic acid (LA) (18:2n-6) and alpha-linolenic acid (ALA) (18:3n-3) precursors.	0.649139	rs174564	11	61588305	G	A	2	rs174564+rs964184+rs192489212	205.551	TRUE	HDL	120.303	TRUE	HDL.Cholesterol	3032.93	TRUE	Degree.of.Unsaturation	473.368	TRUE	1	4108.42	TRUE	Ratio of omega-3 fatty acids to total fatty acids	5101.65	TRUE	Linoleic.Acid / Polyunsaturated.Fatty.Acids	690.651	TRUE	1	1081.51	Ratio of omega-3 fatty acids to total fatty acids	4819.18	Linoleic.Acid / Polyunsaturated.Fatty.Acids	2912.63	1075.49
1:230297136:C:T	89	232	GALNT2	r2 = 0.996 with rs10779835	FALSE	FALSE	FALSE	FALSE	FALSE	FALSE	FALSE	FALSE	.	not annotated	0.385982	rs2281721	1	230297136	T	C	1	rs2281721+rs10889333	200.135	TRUE	logTG	36.4112	TRUE	Total.Triglycerides	76.9247	TRUE	Cholesteryl.Esters.in.Medium.HDL	.	.	.	84.2763	TRUE	Cholesteryl esters to total lipids ratio in very small VLDL	151.541	TRUE	Triglycerides.in.Medium.LDL / Saturated.Fatty.Acids	.	.	.	72.4537	Cholesteryl esters to total lipids ratio in very small VLDL	124.921	Phospholipids.in.Large.LDL / Phospholipids.in.LDL	40.5135	7.35163
17:41926126:C:T	90	2134	.	duplicate model	FALSE	FALSE	FALSE	FALSE	FALSE	FALSE	FALSE	FALSE	.	not annotated	.	rs72836561	17	41926126	T	C	.	.	198.526	TRUE	logTG	.	.	.	.	.	.	.	.	.	.	.	.	.	.	.	.	.	.	.	.	.	.	.	.
1:234849339:G:A	91	239	RP4-781K5.7	primary	TRUE	TRUE	TRUE	TRUE	TRUE	TRUE	TRUE	FALSE	.	.	0.482503	rs2587534	1	234849339	A	G	3	rs2587534+rs12740374+rs11591147+rs11207980	196.917	TRUE	TC	54.975	TRUE	Total.Cholesterol	55.8343	TRUE	Free.Cholesterol.in.Large.LDL	5.43334	TRUE	0.93	55.8343	TRUE	Free.Cholesterol.in.Large.LDL	62.1102	TRUE	Concentration.of.Small.HDL.Particles / Cholesterol.in.Large.LDL	7.19334	TRUE	0.95	36.2383	Free cholesterol to total lipids ratio in small HDL	46.0122	Total.Lipids.in.Large.HDL / Concentration.of.Large.HDL.Particles	0.8593	0
16:56991363:C:T	92	1986	.	duplicate model	FALSE	FALSE	FALSE	FALSE	FALSE	FALSE	FALSE	FALSE	.	not annotated	.	rs183130	16	56991363	T	C	.	.	192.911	TRUE	HDL	.	.	.	.	.	.	.	.	.	.	.	.	.	.	.	.	.	.	.	.	.	.	.	.
5:156396003:C:T	93	808	TIMD4-HAVCR1	r2 = 0.899 with rs4704834	FALSE	FALSE	FALSE	FALSE	FALSE	FALSE	FALSE	FALSE	.	not annotated	0.363789	rs12657266	5	156396003	T	C	1	rs12657266+rs12916	187.453	TRUE	TC	38.7168	TRUE	Total.Cholesterol	65.718	TRUE	Concentration.of.Large.LDL.Particles	.	.	.	65.718	TRUE	Concentration.of.Large.LDL.Particles	76.2815	TRUE	Phospholipids.in.Large.LDL / Cholesterol.in.Medium.VLDL	.	.	.	12.5273	Free cholesterol to total lipids ratio in large HDL	37.2979	Concentration.of.HDL.Particles / Total.Concentration.of.Lipoprotein.Particles	27.0012	0
19:11191729:C:T	94	2291	.	duplicate model	FALSE	FALSE	FALSE	FALSE	FALSE	FALSE	FALSE	FALSE	.	not annotated	.	rs138294113	19	11191729	T	C	.	.	186.272	TRUE	TC	.	.	.	.	.	.	.	.	.	.	.	.	.	.	.	.	.	.	.	.	.	.	.	.
17:7069412:G:A	95	2085	RPL7AP64-ASGR1	MAF<1%	FALSE	FALSE	FALSE	FALSE	FALSE	FALSE	FALSE	FALSE	.	not annotated	0.994792	rs186021206	17	7069412	A	G	1	rs186021206+rs77542162	186.077	TRUE	LDL	61.2709	TRUE	Clinical.LDL.Cholesterol	83.5588	TRUE	Phospholipids.in.Medium.LDL	.	.	.	83.5588	TRUE	Phospholipids.in.Medium.LDL	108.435	TRUE	Phospholipids.in.Medium.LDL / Concentration.of.LDL.Particles	.	.	.	29.2274	Phospholipids to total lipids ratio in very large HDL	94.8255	Apolipoprotein.A1 / Concentration.of.HDL.Particles	22.288	0
6:27067657:A:T	96	847	VN1R11P-RNU2-62P	r2 = 1 with rs35657082	FALSE	FALSE	FALSE	FALSE	FALSE	FALSE	FALSE	FALSE	.	not annotated	0.911991	rs35657082	6	27067657	T	A	8	rs35657082+rs10455872+rs2235215+rs1800562+rs6689+rs2297359+rs9399137+rs148349043+rs9496567	181.001	TRUE	LDL	0.251281	FALSE	Clinical.LDL.Cholesterol	1.78932	FALSE	Acetate	.	.	.	1.78932	FALSE	Acetate	2.36446	FALSE	Acetate / Phenylalanine	.	.	.	1.28028	Cholesterol to total lipids ratio in medium LDL	1.7291	Cholesteryl.Esters.in.Small.LDL / Cholesterol.in.Medium.LDL	1.53804	0
11:61588305:A:G	97	1536	FADS2,FADS1	r2 = 1 with rs174564	FALSE	FALSE	FALSE	FALSE	FALSE	FALSE	FALSE	FALSE	.	not annotated	0.649139	rs174564	11	61588305	G	A	1	rs174564+rs964184	180.09	TRUE	TC	161.145	TRUE	Total.Cholesterol	3030.93	TRUE	Degree.of.Unsaturation	.	.	.	4108.77	TRUE	Ratio of omega-3 fatty acids to total fatty acids	5101.06	TRUE	Linoleic.Acid / Polyunsaturated.Fatty.Acids	.	.	.	1081.42	Ratio of omega-3 fatty acids to total fatty acids	4818.37	Linoleic.Acid / Polyunsaturated.Fatty.Acids	2869.78	1077.84
19:45412079:C:T	98	2396	.	duplicate model	FALSE	FALSE	FALSE	FALSE	FALSE	FALSE	FALSE	FALSE	.	not annotated	.	rs7412	19	45412079	T	C	.	.	173.231	TRUE	nonHDL	.	.	.	.	.	.	.	.	.	.	.	.	.	.	.	.	.	.	.	.	.	.	.	.
1:234852760:C:T	99	242	RP4-781K5.7	r2 = 0.997 with rs2587534	FALSE	FALSE	FALSE	FALSE	FALSE	FALSE	FALSE	FALSE	.	not annotated	0.482735	rs553427	1	234852760	T	C	2	rs553427+rs12740374+rs11591147	172.914	TRUE	LDL	49.1195	TRUE	Clinical.LDL.Cholesterol	55.6569	TRUE	Free.Cholesterol.in.Large.LDL	.	.	.	55.6569	TRUE	Free.Cholesterol.in.Large.LDL	62.2239	TRUE	Phospholipids.in.Small.HDL / Total.Cholesterol	.	.	.	36.6982	Free cholesterol to total lipids ratio in small HDL	46.6476	Total.Lipids.in.Large.HDL / Concentration.of.Large.HDL.Particles	6.53743	0
16:72101525:C:G	100	2033	TXNL4B,HPR	r2 = 1 with rs34042070	FALSE	FALSE	FALSE	FALSE	FALSE	FALSE	FALSE	FALSE	.	not annotated	0.815696	rs34042070	16	72101525	G	C	0	rs34042070	172.63	TRUE	LDL	58.1187	TRUE	Clinical.LDL.Cholesterol	258.122	TRUE	Glycoprotein.Acetyls	.	.	.	258.122	TRUE	Glycoprotein.Acetyls	466.388	TRUE	Glycoprotein.Acetyls / Total.Lipids.in.Lipoprotein.Particles	.	.	.	20.1284	Phospholipids to total lipids ratio in very large VLDL	208.266	Glycoprotein.Acetyls / Total.Lipids.in.Lipoprotein.Particles	200.004	0
1:109817590:G:T	101	146	PSRC1,CELSR2	primary	TRUE	TRUE	TRUE	TRUE	TRUE	TRUE	FALSE	TRUE	SORT1	promotes LDL-uptake and modulates apoB secretion and LDL catabolism	0.778672	rs12740374	1	109817590	T	G	1	rs12740374+rs28362286	170.136	TRUE	LDL	393.271	TRUE	Clinical.LDL.Cholesterol	504.955	TRUE	Phospholipids.in.Small.LDL	88.1085	TRUE	1	504.955	TRUE	Phospholipids.in.Small.LDL	558.653	TRUE	Phospholipids.in.Small.HDL / Total.Lipids.in.Large.LDL	92.7016	TRUE	1	313.094	Free cholesterol to total lipids ratio in small HDL	424.661	Free.Cholesterol.in.Small.HDL / Phospholipids.in.Small.HDL	111.684	0
1:230295789:A:T	102	231	GALNT2	r2 = 0.965 with rs10779835	FALSE	FALSE	FALSE	FALSE	FALSE	FALSE	FALSE	FALSE	.	not annotated	0.392929	rs10127775	1	230295789	T	A	0	rs10127775	169.921	TRUE	HDL	67.292	TRUE	HDL.Cholesterol	76.9776	TRUE	Cholesteryl.Esters.in.Medium.HDL	.	.	.	82.1792	TRUE	Cholesteryl esters to total lipids ratio in very small VLDL	152.801	TRUE	Triglycerides.in.Medium.LDL / Saturated.Fatty.Acids	.	.	.	71.5631	Cholesteryl esters to total lipids ratio in very small VLDL	122.422	Phospholipids.in.Large.LDL / Phospholipids.in.LDL	9.68559	5.20167
19:45422587:A:G	103	2414	APOC1	MAF<1%	FALSE	FALSE	FALSE	FALSE	FALSE	FALSE	FALSE	FALSE	.	not annotated	0.999894	rs12721054	19	45422587	G	A	0	rs12721054	168.698	TRUE	logTG	0.86766	FALSE	Total.Triglycerides	2.63069	FALSE	Citrate	.	.	.	3.29423	FALSE	Cholesteryl esters to total lipids ratio in IDL	5.2991	FALSE	Cholesteryl.Esters.in.IDL / Total.Cholesterol	.	.	.	2.27591	Phospholipids to total lipids ratio in small VLDL	2.97004	Cholesteryl.Esters.in.IDL / Total.Cholesterol	1.76303	0.663536
6:161010118:A:G	104	1012	.	duplicate model	FALSE	FALSE	FALSE	FALSE	FALSE	FALSE	FALSE	FALSE	.	not annotated	.	rs10455872	6	161010118	G	A	.	.	168.592	TRUE	nonHDL	.	.	.	.	.	.	.	.	.	.	.	.	.	.	.	.	.	.	.	.	.	.	.	.
6:31878495:A:G	105	873	C2	r2 = 0.705 with rs3128759	FALSE	FALSE	FALSE	FALSE	FALSE	FALSE	FALSE	FALSE	.	not annotated	0.312927	rs622871	6	31878495	G	A	4	rs622871+rs998584+rs9461755+rs9468937+rs672457	168.004	TRUE	logTG	9.77217	TRUE	Total.Triglycerides	32.3339	TRUE	Glycoprotein.Acetyls	.	.	.	32.3339	TRUE	Glycoprotein.Acetyls	34.2155	TRUE	Glycoprotein.Acetyls / Average.Diameter.for.VLDL.Particles	.	.	.	2.71093	Cholesteryl esters to total lipids ratio in large LDL	9.56752	Concentration.of.IDL.Particles / Remnant.Cholesterol..Non.HDL..Non.LDL..Cholesterol.	22.5618	0
2:21231524:G:A	106	278	APOB	r2 = 1 with rs676210	FALSE	FALSE	FALSE	FALSE	FALSE	FALSE	FALSE	FALSE	.	not annotated	0.796689	rs676210	2	21231524	A	G	0	rs676210	167.309	TRUE	HDL	76.7593	TRUE	HDL.Cholesterol	308.379	TRUE	Concentration.of.Small.VLDL.Particles	.	.	.	308.379	TRUE	Concentration.of.Small.VLDL.Particles	561.741	TRUE	Free.Cholesterol.in.Small.VLDL / Phospholipids.in.LDL	.	.	.	275.779	Phospholipids to total lipids ratio in IDL	369.072	Total.Esterified.Cholesterol / Total.Cholesterol	231.62	0
15:58723939:G:A	107	1924	RP11-355N15.1,LIPC,ALDH1A2	r2 = 0.995 with rs1077835	FALSE	FALSE	FALSE	FALSE	FALSE	FALSE	FALSE	FALSE	.	not annotated	0.781248	rs2070895	15	58723939	A	G	0	rs2070895	166.607	TRUE	HDL	285.964	TRUE	HDL.Cholesterol	1918.09	TRUE	Triglycerides.in.Large.HDL	.	.	.	1918.09	TRUE	Triglycerides.in.Large.HDL	2444.03	TRUE	Free.Cholesterol.in.Small.HDL / Concentration.of.Small.HDL.Particles	.	.	.	1394.37	Free cholesterol to total lipids ratio in small HDL	2318.67	Free.Cholesterol.in.Small.HDL / Concentration.of.Small.HDL.Particles	1632.13	0
16:72101525:C:G	108	2034	TXNL4B,HPR	primary	TRUE	TRUE	TRUE	TRUE	TRUE	TRUE	TRUE	TRUE	HPR	primate-specific plasma protein associated with apolipoprotein L-I (apoL-I)-containing high-density lipoprotein (HDL).	0.815696	rs34042070	16	72101525	G	C	1	rs34042070+rs3764261	165.038	TRUE	nonHDL	65.0785	TRUE	Total.Cholesterol.Minus.HDL.C	258.057	TRUE	Glycoprotein.Acetyls	41.7812	TRUE	1	258.057	TRUE	Glycoprotein.Acetyls	466.516	TRUE	Glycoprotein.Acetyls / Total.Lipids.in.Lipoprotein.Particles	75.6741	TRUE	1	20.8398	Phospholipids to total lipids ratio in very large VLDL	208.459	Glycoprotein.Acetyls / Total.Lipids.in.Lipoprotein.Particles	192.979	0
16:72101525:C:G	109	2035	.	duplicate model	FALSE	FALSE	FALSE	FALSE	FALSE	FALSE	FALSE	FALSE	.	not annotated	.	rs34042070	16	72101525	G	C	.	.	162.519	TRUE	TC	.	.	.	.	.	.	.	.	.	.	.	.	.	.	.	.	.	.	.	.	.	.	.	.
11:116648917:G:C	110	1584	ZNF259,AP006216.10,AP006216.11	primary	TRUE	TRUE	TRUE	TRUE	TRUE	TRUE	TRUE	TRUE	APOA1, APOA4, APOA5, APOC3 locus	APOA1, APOA4, APOA5, APOC3 locus	0.132136	rs964184	11	116648917	C	G	1	rs964184+rs174547	161.009	TRUE	LDL	20.6565	TRUE	Clinical.LDL.Cholesterol	793.917	TRUE	Triglycerides.in.Small.VLDL	130.443	TRUE	1	793.917	TRUE	Triglycerides.in.Small.VLDL	899.809	TRUE	Polyunsaturated.Fatty.Acids / Sphingomyelins	131.299	TRUE	1	487.389	Free cholesterol to total lipids ratio in small LDL	662.62	Free.Cholesterol.in.LDL / LDL.Cholesterol	773.261	0
20:39179822:G:C	111	2492	SNORD112-MAFB	r2 = 1 with rs1883711	FALSE	FALSE	FALSE	FALSE	FALSE	FALSE	FALSE	FALSE	.	not annotated	0.969212	rs1883711	20	39179822	C	G	0	rs1883711	160.721	TRUE	LDL	47.0232	TRUE	Clinical.LDL.Cholesterol	66.0996	TRUE	Cholesterol.in.Very.Small.VLDL	.	.	.	66.0996	TRUE	Cholesterol.in.Very.Small.VLDL	68.9513	TRUE	Cholesterol.in.Very.Small.VLDL / Average.Diameter.for.HDL.Particles	.	.	.	16.1872	Phospholipids to total lipids ratio in very large VLDL	36.9394	Concentration.of.HDL.Particles / Total.Concentration.of.Lipoprotein.Particles	19.0763	0
11:116662407:G:C	112	1593	ZNF259,APOA5	primary	TRUE	TRUE	TRUE	TRUE	TRUE	TRUE	TRUE	FALSE	APOA1, APOA4, APOA5, APOC3 locus (2)	secondary association with LPmtr gene	0.937261	rs3135506	11	116662407	C	G	0	rs3135506	158.704	TRUE	logTG	274.901	TRUE	Total.Triglycerides	306.5	TRUE	Triglycerides.in.Small.VLDL	50.5109	TRUE	1	306.5	TRUE	Triglycerides.in.Small.VLDL	377.974	TRUE	Polyunsaturated.Fatty.Acids / Sphingomyelins	52.7963	TRUE	1	190.858	Cholesteryl esters to total lipids ratio in medium HDL	256.969	Cholesterol.in.Medium.HDL / Concentration.of.Medium.HDL.Particles	31.5998	0
8:126507389:C:A	113	1276	RP11-136O12.2	primary	TRUE	TRUE	TRUE	TRUE	TRUE	TRUE	FALSE	FALSE	.	.	0.299993	rs2954038	8	126507389	A	C	2	rs2954038+rs15285+rs9987289	157.215	TRUE	HDL	11.3353	TRUE	HDL.Cholesterol	204.553	TRUE	Triglycerides.in.Very.Small.VLDL	27.0246	TRUE	1	204.553	TRUE	Triglycerides.in.Very.Small.VLDL	216.812	TRUE	Triglycerides.in.Very.Small.VLDL / Citrate	29.6691	TRUE	1	136.138	Cholesteryl esters to total lipids ratio in medium HDL	161.928	Cholesteryl.Esters.in.Medium.HDL / Concentration.of.Medium.HDL.Particles	193.217	0
20:43042364:C:T	114	2506	HNF4A	r2 = 1 with rs1800961	FALSE	FALSE	FALSE	FALSE	FALSE	FALSE	FALSE	FALSE	.	not annotated	0.968872	rs1800961	20	43042364	T	C	0	rs1800961	156.526	TRUE	HDL	61.5985	TRUE	HDL.Cholesterol	67.2098	TRUE	Total.Concentration.of.Lipoprotein.Particles	.	.	.	67.2098	TRUE	Total.Concentration.of.Lipoprotein.Particles	70.5497	TRUE	Albumin / Total.Concentration.of.Lipoprotein.Particles	.	.	.	34.9876	Phospholipids to total lipids ratio in very small VLDL	49.7353	Cholesteryl.Esters.in.Small.VLDL / Free.Cholesterol.in.Medium.VLDL	5.61127	0
9:136149399:G:A	115	1377	ABO	r2 = 0.997 with rs2519093	FALSE	FALSE	FALSE	FALSE	FALSE	FALSE	FALSE	FALSE	.	not annotated	0.814669	rs507666	9	136149399	A	G	0	rs507666	156.001	TRUE	nonHDL	87.3703	TRUE	Total.Cholesterol.Minus.HDL.C	110.56	TRUE	Cholesteryl.Esters.in.Medium.VLDL	.	.	.	126.324	TRUE	Cholesterol to total lipids ratio in large VLDL	141.629	TRUE	Triglycerides.in.Small.LDL / Cholesteryl.Esters.in.Small.VLDL	.	.	.	117.076	Cholesterol to total lipids ratio in large VLDL	118.53	Cholesterol.in.Large.VLDL / Triglycerides.in.VLDL	23.1898	15.7634
11:47283862:A:G	116	1517	NR1H3	primary	TRUE	TRUE	TRUE	TRUE	TRUE	TRUE	FALSE	TRUE	NR1H3	encodes Oxysterols receptor LXR-alpha, central regulator of cholesterol uptake, efflux and systhemic cholesterol homeostasis	0.696687	rs10838684	11	47283862	G	A	3	rs10838684+rs964184+rs192489212+rs174564	155.111	TRUE	HDL	38.985	TRUE	HDL.Cholesterol	42.9151	TRUE	Cholesteryl.Esters.in.Large.HDL	6.27922	TRUE	1	42.9151	TRUE	Cholesteryl.Esters.in.Large.HDL	46.386	TRUE	Phospholipids.in.Small.HDL / Concentration.of.HDL.Particles	6.93887	TRUE	1	19.2086	Phospholipids to total lipids ratio in medium HDL	29.2945	Free.Cholesterol.in.Small.VLDL / Cholesterol.in.Small.VLDL	3.93011	0
16:56989590:C:T	117	1981	HERPUD1-AC012181.1,AC012181.1	r2 = 0.991 with rs821840	FALSE	FALSE	FALSE	FALSE	FALSE	FALSE	FALSE	FALSE	.	not annotated	0.674812	rs247616	16	56989590	T	C	1	rs247616+rs34042070	154.824	TRUE	TC	37.4228	TRUE	Total.Cholesterol	1332.95	TRUE	Cholesteryl.Esters.in.Large.HDL	.	.	.	1332.95	TRUE	Cholesteryl.Esters.in.Large.HDL	1869.35	TRUE	Cholesteryl.Esters.in.Small.VLDL / Phospholipids.in.Small.VLDL	.	.	.	936.635	Triglycerides to total lipids ratio in large VLDL	1435.2	Cholesteryl.Esters.in.Small.VLDL / Phospholipids.in.Small.VLDL	1295.52	0
8:59392324:G:A	118	1225	UBXN2B-CYP7A1	r2 = 0.949 with rs2081687	FALSE	FALSE	FALSE	FALSE	FALSE	FALSE	FALSE	FALSE	.	not annotated	0.335943	rs9297994	8	59392324	A	G	2	rs9297994+rs28601761+rs9987289	154.51	TRUE	TC	24.5488	TRUE	Total.Cholesterol	32.4996	TRUE	Triglycerides.in.Very.Large.HDL	.	.	.	32.4996	TRUE	Triglycerides.in.Very.Large.HDL	45.8776	TRUE	Citrate / Linoleic.Acid	.	.	.	13.3841	Free cholesterol to total lipids ratio in small HDL	29.7238	Cholesteryl.Esters.in.Small.HDL / Concentration.of.Small.HDL.Particles	7.95085	0
1:62911341:T:C	119	96	USP1	primary	TRUE	TRUE	TRUE	TRUE	TRUE	TRUE	TRUE	TRUE	ANGPTL3	inhibits LPL and EL activity	0.643859	rs598253	1	62911341	C	T	3	rs598253+rs12740374+rs11591147+rs553427	152.523	TRUE	LDL	34.6513	TRUE	Clinical.LDL.Cholesterol	277.061	TRUE	Polyunsaturated.Fatty.Acids	41.9654	TRUE	1	277.061	TRUE	Polyunsaturated.Fatty.Acids	323.067	TRUE	Albumin / Polyunsaturated.Fatty.Acids	45.3254	TRUE	1	158.873	Cholesteryl esters to total lipids ratio in small LDL	235.695	Free.Cholesterol.in.Small.LDL / LDL.Cholesterol	242.41	0
4:72754788:A:C	120	642	RP11-545L5.1-NPFFR2	r2 = 1 with rs938075289	FALSE	FALSE	FALSE	FALSE	FALSE	FALSE	FALSE	FALSE	.	not annotated	0.999952	rs938075289	4	72754788	C	A	4	rs938075289+rs573930512+rs537526354+rs4860987+rs13108218	149.6	TRUE	TC	0.133229	FALSE	Total.Cholesterol	1.82434	FALSE	Acetoacetate	.	.	.	1.82434	FALSE	Acetoacetate	2.18108	FALSE	Acetoacetate / Citrate	.	.	.	0.737725	Triglycerides to total lipids ratio in very large VLDL	1.45873	Phospholipids.in.Large.VLDL / Concentration.of.Very.Large.VLDL.Particles	1.69111	0
20:39179822:G:C	121	2495	.	duplicate model	FALSE	FALSE	FALSE	FALSE	FALSE	FALSE	FALSE	FALSE	.	not annotated	.	rs1883711	20	39179822	C	G	.	.	146.939	TRUE	TC	.	.	.	.	.	.	.	.	.	.	.	.	.	.	.	.	.	.	.	.	.	.	.	.
15:58723426:A:G	122	1920	RP11-355N15.1,LIPC,ALDH1A2	r2 = 1 with rs1077835	FALSE	FALSE	FALSE	FALSE	FALSE	FALSE	FALSE	FALSE	.	not annotated	0.780636	rs1077835	15	58723426	G	A	1	rs1077835+rs139974673	146.866	TRUE	logTG	39.5946	TRUE	Total.Triglycerides	1915.46	TRUE	Triglycerides.in.Large.HDL	.	.	.	1915.46	TRUE	Triglycerides.in.Large.HDL	2440.05	TRUE	Free.Cholesterol.in.Small.HDL / Concentration.of.Small.HDL.Particles	.	.	.	1393.39	Free cholesterol to total lipids ratio in small HDL	2315.03	Free.Cholesterol.in.Small.HDL / Concentration.of.Small.HDL.Particles	1875.86	0
5:156390297:T:C	123	801	TIMD4,TIMD4-HAVCR1	r2 = 0.899 with rs4704834	FALSE	FALSE	FALSE	FALSE	FALSE	FALSE	FALSE	FALSE	.	not annotated	0.363951	rs6882076	5	156390297	C	T	1	rs6882076+rs12916	143.365	TRUE	nonHDL	46.1061	TRUE	Total.Cholesterol.Minus.HDL.C	65.8859	TRUE	Concentration.of.Large.LDL.Particles	.	.	.	65.8859	TRUE	Concentration.of.Large.LDL.Particles	76.2729	TRUE	Phospholipids.in.Large.LDL / Cholesterol.in.Medium.VLDL	.	.	.	12.3977	Free cholesterol to total lipids ratio in large HDL	37.3046	Concentration.of.HDL.Particles / Total.Concentration.of.Lipoprotein.Particles	19.7798	0
11:61570783:T:C	124	1529	FADS2,FADS1	r2 = 0.979 with rs174564	FALSE	FALSE	FALSE	FALSE	FALSE	FALSE	FALSE	FALSE	.	not annotated	0.653241	rs174547	11	61570783	C	T	0	rs174547	142.656	TRUE	LDL	117.018	TRUE	Clinical.LDL.Cholesterol	2980.19	TRUE	Degree.of.Unsaturation	.	.	.	4043	TRUE	Ratio of omega-3 fatty acids to total fatty acids	5011.64	TRUE	Linoleic.Acid / Polyunsaturated.Fatty.Acids	.	.	.	1074.74	Ratio of omega-3 fatty acids to total fatty acids	4735.64	Linoleic.Acid / Polyunsaturated.Fatty.Acids	2863.17	1062.82
20:17844684:G:T	125	2475	AL035045.1-RP5-905G11.3	primary	TRUE	TRUE	TRUE	TRUE	TRUE	TRUE	TRUE	FALSE	.	.	0.339564	rs2618566	20	17844684	T	G	1	rs2618566+rs1883711	142.059	TRUE	LDL	27.4816	TRUE	Clinical.LDL.Cholesterol	35.6576	TRUE	Free.Cholesterol.in.IDL	7.77214	TRUE	0.62	39.509	TRUE	Phospholipids to total lipids ratio in medium VLDL	53.6525	TRUE	Phospholipids.in.Small.HDL / Total.Esterified.Cholesterol	9.96912	TRUE	0.92	34.7892	Free cholesterol to total lipids ratio in small HDL	40.0104	Free.Cholesterol.in.HDL / Phospholipids.in.HDL	8.17594	3.85143
16:56993324:C:A	126	1987	CETP,AC012181.1-CETP,AC012181.1	r2 = 0.999 with rs821840	FALSE	FALSE	FALSE	FALSE	FALSE	FALSE	FALSE	FALSE	.	not annotated	0.675029	rs3764261	16	56993324	A	C	0	rs3764261	139.694	TRUE	nonHDL	45.3854	TRUE	Total.Cholesterol.Minus.HDL.C	1336.94	TRUE	Cholesteryl.Esters.in.Large.HDL	.	.	.	1336.94	TRUE	Cholesteryl.Esters.in.Large.HDL	1876.03	TRUE	Cholesteryl.Esters.in.Small.VLDL / Phospholipids.in.Small.VLDL	.	.	.	938.169	Triglycerides to total lipids ratio in large VLDL	1442.88	Cholesteryl.Esters.in.Small.VLDL / Phospholipids.in.Small.VLDL	1291.55	0
17:7069412:G:A	127	2087	.	duplicate model	FALSE	FALSE	FALSE	FALSE	FALSE	FALSE	FALSE	FALSE	.	not annotated	.	rs186021206	17	7069412	A	G	.	.	139.304	TRUE	TC	.	.	.	.	.	.	.	.	.	.	.	.	.	.	.	.	.	.	.	.	.	.	.	.
15:44027885:T:C	128	1895	CATSPER2P1,RNU6-354P	r2 = 0.928 with rs190543502	FALSE	FALSE	FALSE	FALSE	FALSE	FALSE	FALSE	FALSE	.	not annotated	0.975279	rs139974673	15	44027885	C	T	0	rs139974673	139.031	TRUE	logTG	67.3517	TRUE	Total.Triglycerides	98.6666	TRUE	Triglycerides.in.Very.Small.VLDL	.	.	.	109.923	TRUE	Free cholesterol to total lipids ratio in large LDL	131.101	TRUE	Triglycerides.in.Very.Small.VLDL / Citrate	.	.	.	104.893	Free cholesterol to total lipids ratio in large LDL	104.893	Free.Cholesterol.in.Large.LDL / Total.Lipids.in.Large.LDL	31.3149	11.256
17:67081278:A:G	129	2177	ABCA6	r2 = 1 with rs77542162	FALSE	FALSE	FALSE	FALSE	FALSE	FALSE	FALSE	FALSE	.	not annotated	0.976632	rs77542162	17	67081278	G	A	1	rs77542162+rs186021206	138.281	TRUE	nonHDL	58.8412	TRUE	Total.Cholesterol.Minus.HDL.C	117.211	TRUE	Cholesteryl.Esters.in.Very.Small.VLDL	.	.	.	117.917	TRUE	Phospholipids to total lipids ratio in medium VLDL	181.785	TRUE	Cholesteryl.Esters.in.Very.Small.VLDL / Albumin	.	.	.	86.1568	Triglycerides to total lipids ratio in small VLDL	108.932	Triglycerides.in.Small.VLDL / Phospholipids.in.VLDL	58.3698	0.705884
6:28796071:G:C	130	855	AL662890.3-XXbac-BPG308K3.5	primary	TRUE	TRUE	FALSE	FALSE	FALSE	FALSE	FALSE	FALSE	.	not annotated	0.868246	rs3131337	6	28796071	C	G	17	rs3131337+rs998584+rs9461755+rs9468937+rs672457+rs622871+rs41272086+rs577721086+rs144607208+rs2749005+rs78425119+rs3094034+rs7740188+rs35045014+rs75507056+rs73029263+rs9480889+rs9258375	138.173	TRUE	logTG	0.194035	FALSE	Total.Triglycerides	2.17929	FALSE	Sphingomyelins	.	.	.	2.59574	FALSE	Free cholesterol to total lipids ratio in small HDL	3.60398	FALSE	Tyrosine / Phenylalanine	.	.	.	1.686	Free cholesterol to total lipids ratio in small HDL	1.97531	Free.Cholesterol.in.Small.HDL / Phospholipids.in.Small.HDL	1.98525	0.416451
4:72754788:A:C	131	640	RP11-545L5.1-NPFFR2	MAF<1%	FALSE	FALSE	FALSE	FALSE	FALSE	FALSE	FALSE	FALSE	.	not annotated	0.999952	rs938075289	4	72754788	C	A	4	rs938075289+rs187918276+rs537526354+rs181372486+rs4860987	137.629	TRUE	LDL	0.120889	FALSE	Clinical.LDL.Cholesterol	1.84327	FALSE	Acetoacetate	.	.	.	1.84327	FALSE	Acetoacetate	2.20123	FALSE	Acetoacetate / Citrate	.	.	.	0.70808	Triglycerides to total lipids ratio in very large VLDL	1.41193	Phospholipids.in.Large.VLDL / Concentration.of.Very.Large.VLDL.Particles	1.72238	0
20:39179822:G:C	132	2494	.	duplicate model	FALSE	FALSE	FALSE	FALSE	FALSE	FALSE	FALSE	FALSE	.	not annotated	.	rs1883711	20	39179822	C	G	.	.	136.267	TRUE	nonHDL	.	.	.	.	.	.	.	.	.	.	.	.	.	.	.	.	.	.	.	.	.	.	.	.
2:227099180:C:T	133	486	AC068138.1-MIR5702	r2 = 0.993 with rs2203452	FALSE	FALSE	FALSE	FALSE	FALSE	FALSE	FALSE	FALSE	.	not annotated	0.352992	rs2943645	2	227099180	T	C	1	rs2943645+rs676210	135.321	TRUE	HDL	38.572	TRUE	HDL.Cholesterol	47.8805	TRUE	Cholesteryl.Esters.in.Large.HDL	.	.	.	54.1316	TRUE	Inverse Ratio of triglycerides to phosphoglycerides	64.2651	TRUE	Free.Cholesterol.in.Small.HDL / Total.Concentration.of.Lipoprotein.Particles	.	.	.	38.9465	Free cholesterol to total lipids ratio in large LDL	52.2772	Free.Cholesterol.in.Small.HDL / Total.Concentration.of.Lipoprotein.Particles	9.30855	6.25106
18:47109955:A:G	134	2224	LIPG	primary	TRUE	TRUE	TRUE	TRUE	TRUE	TRUE	TRUE	TRUE	LIPG	this gene has substantial phospholipase activity	0.986382	rs77960347	18	47109955	G	A	0	rs77960347	131.683	TRUE	TC	73.971	TRUE	Total.Cholesterol	191.933	TRUE	Phosphatidylcholines	25.1019	TRUE	1	191.933	TRUE	Phosphatidylcholines	225.712	TRUE	Phospholipids.in.Small.LDL / Total.Free.Cholesterol	44.1995	TRUE	1	63.0482	Free cholesterol to total lipids ratio in very large HDL	177.877	Apolipoprotein.B / Remnant.Cholesterol..Non.HDL..Non.LDL..Cholesterol.	117.962	0
16:56990716:C:A	135	1983	HERPUD1-AC012181.1,AC012181.1	r2 = 0.994 with rs821840	FALSE	FALSE	FALSE	FALSE	FALSE	FALSE	FALSE	FALSE	.	not annotated	0.675887	rs247617	16	56990716	A	C	1	rs247617+rs34042070	131.309	TRUE	LDL	29.7805	TRUE	Clinical.LDL.Cholesterol	1333.43	TRUE	Cholesteryl.Esters.in.Large.HDL	.	.	.	1333.43	TRUE	Cholesteryl.Esters.in.Large.HDL	1872.25	TRUE	Cholesteryl.Esters.in.Small.VLDL / Phospholipids.in.Small.VLDL	.	.	.	937.367	Triglycerides to total lipids ratio in large VLDL	1439.38	Cholesteryl.Esters.in.Small.VLDL / Phospholipids.in.Small.VLDL	1303.65	0
1:109817590:G:T	136	152	.	duplicate model	FALSE	FALSE	FALSE	FALSE	FALSE	FALSE	FALSE	FALSE	.	not annotated	.	rs12740374	1	109817590	T	G	.	.	131.252	TRUE	TC	.	.	.	.	.	.	.	.	.	.	.	.	.	.	.	.	.	.	.	.	.	.	.	.
17:67081278:A:G	137	2178	.	duplicate model	FALSE	FALSE	FALSE	FALSE	FALSE	FALSE	FALSE	FALSE	.	not annotated	.	rs77542162	17	67081278	G	A	.	.	129.748	TRUE	TC	.	.	.	.	.	.	.	.	.	.	.	.	.	.	.	.	.	.	.	.	.	.	.	.
8:9183358:A:G	138	1149	.	duplicate model	FALSE	FALSE	FALSE	FALSE	FALSE	FALSE	FALSE	FALSE	.	not annotated	.	rs9987289	8	9183358	G	A	.	.	129.688	TRUE	LDL	.	.	.	.	.	.	.	.	.	.	.	.	.	.	.	.	.	.	.	.	.	.	.	.
6:27067657:A:T	139	849	VN1R11P-RNU2-62P	primary	TRUE	TRUE	FALSE	FALSE	FALSE	FALSE	FALSE	FALSE	.	not annotated	0.911991	rs35657082	6	27067657	T	A	14	rs35657082+rs10455872+rs6689+rs2235215+rs80215559+rs9402685+rs78425119+rs3800461+rs6457374+rs1338667+rs622871+rs9496567+rs2844795+rs148349043+rs62441842	125.362	TRUE	TC	0.179836	FALSE	Total.Cholesterol	2.14661	FALSE	Acetate	.	.	.	2.14661	FALSE	Acetate	2.89279	FALSE	Triglycerides.in.Large.LDL / Glucose	.	.	.	1.59521	Cholesterol to total lipids ratio in medium LDL	2.01016	Free.Cholesterol.in.Small.LDL / Concentration.of.Large.LDL.Particles	1.96678	0
1:234853059:C:T	140	243	RP4-781K5.7	r2 = 0.981 with rs2587534	FALSE	FALSE	FALSE	FALSE	FALSE	FALSE	FALSE	FALSE	.	not annotated	0.478064	rs556107	1	234853059	T	C	3	rs556107+rs12740374+rs11591147+rs10889333	125.211	TRUE	nonHDL	50.0772	TRUE	Total.Cholesterol.Minus.HDL.C	56.3715	TRUE	Free.Cholesterol.in.Large.LDL	.	.	.	56.3715	TRUE	Free.Cholesterol.in.Large.LDL	63.0027	TRUE	Concentration.of.Small.HDL.Particles / Cholesterol.in.Large.LDL	.	.	.	36.5441	Free cholesterol to total lipids ratio in small HDL	46.622	Total.Lipids.in.Large.HDL / Concentration.of.Large.HDL.Particles	6.29428	0
9:15304782:C:A	141	1297	TTC39B	r2 = 1 with rs686030	FALSE	FALSE	FALSE	FALSE	FALSE	FALSE	FALSE	FALSE	.	not annotated	0.140941	rs686030	9	15304782	A	C	1	rs686030+rs2740488	125.08	TRUE	HDL	37.2514	TRUE	HDL.Cholesterol	49.9639	TRUE	Concentration.of.Very.Large.HDL.Particles	.	.	.	80.9987	TRUE	Free cholesterol to total lipids ratio in small HDL	104.172	TRUE	Triglycerides.in.Very.Large.HDL / Phospholipids.in.Very.Small.VLDL	.	.	.	66.4458	Phospholipids to total lipids ratio in large LDL	66.4458	Phospholipids.in.Large.LDL / Total.Lipids.in.Large.LDL	12.7126	31.0347
1:40035928:G:T	142	37	PABPC4,SNORA55,RP11-69E11.8	primary	TRUE	TRUE	TRUE	TRUE	TRUE	TRUE	TRUE	FALSE	.	.	0.802635	rs3768321	1	40035928	T	G	1	rs3768321+rs10127775	123.415	TRUE	HDL	28.6146	TRUE	HDL.Cholesterol	31.1117	TRUE	Cholesteryl.Esters.in.HDL	4.84247	TRUE	0.95	32.0492	TRUE	Phospholipids to total lipids ratio in medium HDL	38.2449	TRUE	Triglycerides.in.IDL / Phosphoglycerides	3.40696	FALSE	0.98	20.0533	Cholesterol to total lipids ratio in IDL	27.9153	Phospholipids.in.Large.LDL / Apolipoprotein.B	2.49711	0.937512
4:110095620:T:C	143	694	COL25A1	r2 = 0.731 with rs114816312	FALSE	FALSE	FALSE	FALSE	FALSE	FALSE	FALSE	FALSE	.	not annotated	0.992946	rs138307849	4	110095620	C	T	12	rs138307849+rs573930512+rs537526354+rs34707604+rs13108218+rs6054+rs938075289+rs189087436+rs3775228+rs28431971+rs41280463+rs114816312+rs530082542	123.209	TRUE	nonHDL	0.153455	FALSE	Total.Cholesterol.Minus.HDL.C	1.15414	FALSE	Glutamine	.	.	.	1.23114	FALSE	Free cholesterol to total lipids ratio in IDL	2.23182	FALSE	Triglycerides.in.Very.Large.VLDL / Cholesterol.in.Chylomicrons.and.Extremely.Large.VLDL	.	.	.	0.813365	Free cholesterol to total lipids ratio in IDL	2.01962	Triglycerides.in.Very.Large.VLDL / Cholesterol.in.Chylomicrons.and.Extremely.Large.VLDL	1.00068	0.0770017
6:32947516:A:G	144	894	BRD2	primary	TRUE	TRUE	FALSE	FALSE	FALSE	FALSE	FALSE	FALSE	.	not annotated	0.983203	rs144607208	6	32947516	G	A	7	rs144607208+rs998584+rs9461755+rs9468937+rs672457+rs622871+rs41272086+rs577721086	122.857	TRUE	logTG	0.0189266	FALSE	Total.Triglycerides	1.47176	FALSE	Free.Cholesterol.in.Large.LDL	.	.	.	1.47176	FALSE	Free.Cholesterol.in.Large.LDL	2.89246	FALSE	Total.Lipids.in.Very.Large.VLDL / Concentration.of.Very.Large.VLDL.Particles	.	.	.	1.00057	Free cholesterol to total lipids ratio in small HDL	2.84564	Total.Lipids.in.Very.Large.VLDL / Concentration.of.Very.Large.VLDL.Particles	1.45283	0
8:59392324:G:A	145	1223	.	duplicate model	FALSE	FALSE	FALSE	FALSE	FALSE	FALSE	FALSE	FALSE	.	not annotated	.	rs9297994	8	59392324	A	G	.	.	121.002	TRUE	LDL	.	.	.	.	.	.	.	.	.	.	.	.	.	.	.	.	.	.	.	.	.	.	.	.
8:19821782:T:G	146	1193	LPL	r2 = 0.942 with rs328	FALSE	FALSE	FALSE	FALSE	FALSE	FALSE	FALSE	FALSE	.	not annotated	0.89384	rs77069344	8	19821782	G	T	0	rs77069344	120.517	TRUE	HDL	277.325	TRUE	HDL.Cholesterol	437.265	TRUE	Triglycerides.in.Small.VLDL	.	.	.	507.524	TRUE	Triglycerides to total lipids ratio in small HDL	604.121	TRUE	Triglycerides.in.Small.VLDL / Saturated.Fatty.Acids	.	.	.	369.115	Free cholesterol to total lipids ratio in medium LDL	483.099	Cholesterol.in.IDL / Remnant.Cholesterol..Non.HDL..Non.LDL..Cholesterol.	159.94	70.2585
5:156396003:C:T	147	807	.	duplicate model	FALSE	FALSE	FALSE	FALSE	FALSE	FALSE	FALSE	FALSE	.	not annotated	.	rs12657266	5	156396003	T	C	.	.	118.135	TRUE	LDL	.	.	.	.	.	.	.	.	.	.	.	.	.	.	.	.	.	.	.	.	.	.	.	.
17:7069412:G:A	148	2086	RPL7AP64-ASGR1	r2 = 1 with rs186021206	FALSE	FALSE	FALSE	FALSE	FALSE	FALSE	FALSE	FALSE	.	not annotated	0.994792	rs186021206	17	7069412	A	G	0	rs186021206	117.375	TRUE	nonHDL	47.3009	TRUE	Total.Cholesterol.Minus.HDL.C	83.392	TRUE	Phospholipids.in.Medium.LDL	.	.	.	83.392	TRUE	Phospholipids.in.Medium.LDL	108.496	TRUE	Phospholipids.in.Medium.LDL / Concentration.of.LDL.Particles	.	.	.	29.2081	Phospholipids to total lipids ratio in very large HDL	94.7948	Apolipoprotein.A1 / Concentration.of.HDL.Particles	36.0912	0
6:32627700:A:G	149	889	XXbac-BPG254F23.6,HLA-DQB1-AS1,HLA-DQB1	r2 = 1 with rs6689	FALSE	FALSE	FALSE	FALSE	FALSE	FALSE	FALSE	FALSE	.	not annotated	0.811861	rs6689	6	32627700	G	A	1	rs6689+rs10455872	116.842	TRUE	TC	24.6893	TRUE	Total.Cholesterol	53.2581	TRUE	Cholesteryl.Esters.in.VLDL	.	.	.	53.2581	TRUE	Cholesteryl.Esters.in.VLDL	66.6609	TRUE	Phospholipids.in.Large.LDL / Cholesterol.in.Medium.VLDL	.	.	.	14.4084	Phospholipids to total lipids ratio in very large VLDL	33.0077	Concentration.of.HDL.Particles / Total.Concentration.of.Lipoprotein.Particles	28.5688	0
11:116662579:C:T	150	1596	.	duplicate model	FALSE	FALSE	FALSE	FALSE	FALSE	FALSE	FALSE	FALSE	.	not annotated	.	rs651821	11	116662579	T	C	.	.	116.213	TRUE	nonHDL	.	.	.	.	.	.	.	.	.	.	.	.	.	.	.	.	.	.	.	.	.	.	.	.
20:44551855:T:C	151	2518	PLTP-PCIF1	r2 = 0.925 with rs6065908	FALSE	FALSE	FALSE	FALSE	FALSE	FALSE	FALSE	FALSE	.	not annotated	0.802391	rs6073958	20	44551855	C	T	0	rs6073958	116.127	TRUE	logTG	37.9014	TRUE	Total.Triglycerides	942.608	TRUE	Phospholipids.in.Very.Large.HDL	.	.	.	942.608	TRUE	Phospholipids.in.Very.Large.HDL	1126.36	TRUE	Cholesteryl.Esters.in.Medium.HDL / Phospholipids.in.Very.Large.HDL	.	.	.	317.695	Free cholesterol to total lipids ratio in large HDL	862.967	Free.Cholesterol.in.Small.HDL / Total.Cholines	904.707	0
20:39754695:C:G	152	2500	TOP1,RP1-1J6.2	r2 = 0.969 with rs4812493	FALSE	FALSE	FALSE	FALSE	FALSE	FALSE	FALSE	FALSE	.	not annotated	0.523581	rs6029549	20	39754695	G	C	2	rs6029549+rs1883711+rs1800961	114.724	TRUE	TC	24.3377	TRUE	Total.Cholesterol	29.5091	TRUE	Phospholipids.in.LDL	.	.	.	29.5091	TRUE	Phospholipids.in.LDL	34.0438	TRUE	Phospholipids.in.Medium.LDL / Histidine	.	.	.	7.11671	Triglycerides to total lipids ratio in large VLDL	11.2439	Concentration.of.Large.VLDL.Particles / Triglycerides.in.VLDL	5.17139	0
4:103188709:C:T	153	684	SLC39A8	r2 = 1 with rs13107325	FALSE	FALSE	FALSE	FALSE	FALSE	FALSE	FALSE	FALSE	.	not annotated	0.925684	rs13107325	4	103188709	T	C	0	rs13107325	114.47	TRUE	HDL	43.2924	TRUE	HDL.Cholesterol	43.3008	TRUE	Free.Cholesterol.in.HDL	.	.	.	45.9784	TRUE	Free cholesterol to total lipids ratio in medium HDL	45.9784	TRUE	Free.Cholesterol.in.Medium.HDL / Total.Lipids.in.Medium.HDL	.	.	.	26.349	Phospholipids to total lipids ratio in very small VLDL	40.8664	Saturated.Fatty.Acids / Triglycerides.in.LDL	0.00845	2.67751
2:227095876:G:T	154	485	AC068138.1-MIR5702	r2 = 0.997 with rs2203452	FALSE	FALSE	FALSE	FALSE	FALSE	FALSE	FALSE	FALSE	.	not annotated	0.352271	rs1024137	2	227095876	T	G	2	rs1024137+rs1260326+rs676210	113.356	TRUE	logTG	38.1707	TRUE	Total.Triglycerides	47.8221	TRUE	Cholesteryl.Esters.in.Large.HDL	.	.	.	54.51	TRUE	Inverse Ratio of triglycerides to phosphoglycerides	64.4716	TRUE	Free.Cholesterol.in.Small.HDL / Total.Concentration.of.Lipoprotein.Particles	.	.	.	39.4594	Free cholesterol to total lipids ratio in large LDL	52.8616	Free.Cholesterol.in.Small.HDL / Total.Concentration.of.Lipoprotein.Particles	9.65141	6.68796
8:59392324:G:A	155	1224	UBXN2B-CYP7A1	r2 = 0.949 with rs2081687	FALSE	FALSE	FALSE	FALSE	FALSE	FALSE	FALSE	FALSE	.	not annotated	0.335943	rs9297994	8	59392324	A	G	1	rs9297994+rs28601761	112.058	TRUE	nonHDL	26.7835	TRUE	Total.Cholesterol.Minus.HDL.C	32.5002	TRUE	Triglycerides.in.Very.Large.HDL	.	.	.	32.5002	TRUE	Triglycerides.in.Very.Large.HDL	45.8656	TRUE	Citrate / Linoleic.Acid	.	.	.	13.3976	Free cholesterol to total lipids ratio in small HDL	29.7152	Cholesteryl.Esters.in.Small.HDL / Concentration.of.Small.HDL.Particles	5.71662	0
15:43820717:C:T	156	1894	PPIP5K1,MAP1A	r2 = 0.93 with rs190543502	FALSE	FALSE	FALSE	FALSE	FALSE	FALSE	FALSE	FALSE	.	not annotated	0.975263	rs55707100	15	43820717	T	C	1	rs55707100+rs261290	110.78	TRUE	HDL	14.3362	TRUE	HDL.Cholesterol	95.0804	TRUE	Triglycerides.in.Very.Small.VLDL	.	.	.	108.729	TRUE	Free cholesterol to total lipids ratio in large LDL	127.674	TRUE	Triglycerides.in.Very.Small.VLDL / Citrate	.	.	.	103.18	Free cholesterol to total lipids ratio in large LDL	103.18	Free.Cholesterol.in.Large.LDL / Total.Lipids.in.Large.LDL	80.7442	13.6489
12:125325010:C:G	157	1785	SCARB1	primary	TRUE	TRUE	TRUE	TRUE	TRUE	TRUE	TRUE	FALSE	SCARB1 (2)	secondary association with LPmtr gene	0.87639	rs61941677	12	125325010	G	C	0	rs61941677	109.818	TRUE	HDL	46.3689	TRUE	HDL.Cholesterol	65.5002	TRUE	Average.Diameter.for.HDL.Particles	2.00058	FALSE	1	65.5002	TRUE	Average.Diameter.for.HDL.Particles	70.5851	TRUE	Cholesterol.in.Small.HDL / Concentration.of.HDL.Particles	1.80776	FALSE	1	30.0221	Phospholipids to total lipids ratio in small HDL	58.3993	Triglycerides.in.Small.HDL / Triglycerides.in.HDL	19.1314	0
8:116597635:T:C	158	1248	TRPS1	r2 = 0.914 with rs2737212	FALSE	FALSE	FALSE	FALSE	FALSE	FALSE	FALSE	FALSE	.	not annotated	0.43543	rs3808460	8	116597635	C	T	3	rs3808460+rs15285+rs9987289+rs2954038	108.876	TRUE	HDL	30.0121	TRUE	HDL.Cholesterol	33.26	TRUE	Total.Lipids.in.HDL	.	.	.	33.26	TRUE	Total.Lipids.in.HDL	35.2953	TRUE	Albumin / Total.Lipids.in.HDL	.	.	.	12.4487	Free cholesterol to total lipids ratio in very large HDL	30.6314	Triglycerides.in.Small.HDL / Triglycerides.in.HDL	3.24789	0
11:126225876:C:G	159	1630	ST3GAL4	r2 = 1 with rs112771035	FALSE	FALSE	FALSE	FALSE	FALSE	FALSE	FALSE	FALSE	.	not annotated	0.928517	rs112771035	11	126225876	G	C	2	rs112771035+rs174547+rs964184	107.25	TRUE	LDL	35.2633	TRUE	Clinical.LDL.Cholesterol	37.6458	TRUE	Concentration.of.IDL.Particles	.	.	.	41.7601	TRUE	Inverse Ratio of apolipoprotein B to apolipoprotein A1	59.9136	TRUE	Phospholipids.in.Large.LDL / Total.Esterified.Cholesterol	.	.	.	26.0692	Triglycerides to total lipids ratio in large VLDL	43.1673	Sphingomyelins / Total.Lipids.in.HDL	2.38258	4.11425
20:43042364:C:T	160	2509	HNF4A	r2 = 1 with rs1800961	FALSE	FALSE	FALSE	FALSE	FALSE	FALSE	FALSE	FALSE	.	not annotated	0.968872	rs1800961	20	43042364	T	C	1	rs1800961+rs1883711	107.206	TRUE	TC	39.869	TRUE	Total.Cholesterol	67.1125	TRUE	Total.Concentration.of.Lipoprotein.Particles	.	.	.	67.1125	TRUE	Total.Concentration.of.Lipoprotein.Particles	70.468	TRUE	Albumin / Total.Concentration.of.Lipoprotein.Particles	.	.	.	35.0582	Phospholipids to total lipids ratio in very small VLDL	49.789	Cholesteryl.Esters.in.Small.VLDL / Free.Cholesterol.in.Medium.VLDL	27.2435	0
2:165528876:C:T	161	459	COBLL1	primary	TRUE	TRUE	TRUE	TRUE	TRUE	TRUE	FALSE	FALSE	.	.	0.606245	rs13389219	2	165528876	T	C	3	rs13389219+rs1260326+rs676210+rs1024137	106.996	TRUE	logTG	48.2172	TRUE	Total.Triglycerides	52.5077	TRUE	Concentration.of.Very.Large.VLDL.Particles	8.32904	TRUE	1	52.5077	TRUE	Concentration.of.Very.Large.VLDL.Particles	59.1572	TRUE	Concentration.of.Very.Large.VLDL.Particles / Glycine	8.86746	TRUE	1	29.0556	Cholesterol to total lipids ratio in medium HDL	46.2032	Free.Cholesterol.in.Small.HDL / Total.Concentration.of.Lipoprotein.Particles	4.29044	0
16:56393734:CCT:C	162	1977	GNAO1,AMFR,GNAO1-AMFR	MAF<1%	FALSE	FALSE	FALSE	FALSE	FALSE	FALSE	FALSE	FALSE	.	not annotated	0.993195	rs560117104	16	56393734	C	CCT	3	rs560117104+rs183130+rs55781197+rs2925979	106.34	TRUE	HDL	10.1273	TRUE	HDL.Cholesterol	11.9432	TRUE	Cholesteryl.Esters.in.Large.HDL	.	.	.	11.9432	TRUE	Cholesteryl.Esters.in.Large.HDL	18.6114	TRUE	Cholesteryl.Esters.in.Small.VLDL / Phospholipids.in.Small.VLDL	.	.	.	7.89111	Phospholipids to total lipids ratio in large VLDL	12.999	Cholesteryl.Esters.in.Small.VLDL / Phospholipids.in.Small.VLDL	1.81581	0
8:19824667:C:T	163	1196	LPL	primary	TRUE	TRUE	TRUE	TRUE	TRUE	TRUE	FALSE	FALSE	LPL (2)	secondary association with LPmtr gene	0.715841	rs15285	8	19824667	T	C	2	rs15285+rs28601761+rs9297994	106.174	TRUE	nonHDL	12.1048	TRUE	Total.Cholesterol.Minus.HDL.C	351.586	TRUE	Triglycerides.in.Small.VLDL	57.098	TRUE	1	459.211	TRUE	Triglycerides to total lipids ratio in small HDL	519.121	TRUE	Triglycerides.in.Small.VLDL / Saturated.Fatty.Acids	84.6302	TRUE	1	301.513	Free cholesterol to total lipids ratio in large LDL	422.24	Cholesterol.in.IDL / Remnant.Cholesterol..Non.HDL..Non.LDL..Cholesterol.	339.481	107.626
18:47632322:T:C	164	2234	MYO5B	r2 = 0.752 with rs76511906	FALSE	FALSE	FALSE	FALSE	FALSE	FALSE	FALSE	FALSE	.	not annotated	0.990567	rs143376213	18	47632322	C	T	2	rs143376213+rs77960347+rs538969346	105.821	TRUE	TC	0.21926	FALSE	Total.Cholesterol	2.03546	FALSE	Glycine	.	.	.	2.03546	FALSE	Glycine	2.6323	FALSE	Pyruvate / Glycine	.	.	.	0.696523	Free cholesterol to total lipids ratio in small HDL	1.12081	Phospholipids.in.Medium.LDL / LDL.Cholesterol	1.8162	0
1:109817838:T:C	165	153	PSRC1,CELSR2	r2 = 0.948 with rs12740374	FALSE	FALSE	FALSE	FALSE	FALSE	FALSE	FALSE	FALSE	.	not annotated	0.215213	rs660240	1	109817838	C	T	0	rs660240	105.021	TRUE	LDL	371.801	TRUE	Clinical.LDL.Cholesterol	474.376	TRUE	Phospholipids.in.Small.LDL	.	.	.	474.376	TRUE	Phospholipids.in.Small.LDL	525.133	TRUE	Phospholipids.in.Small.HDL / Total.Lipids.in.Large.LDL	.	.	.	295.385	Free cholesterol to total lipids ratio in small HDL	400.434	Free.Cholesterol.in.Small.HDL / Phospholipids.in.Small.HDL	102.574	0
20:39754695:C:G	166	2499	TOP1,RP1-1J6.2	r2 = 0.969 with rs4812493	FALSE	FALSE	FALSE	FALSE	FALSE	FALSE	FALSE	FALSE	.	not annotated	0.523581	rs6029549	20	39754695	G	C	2	rs6029549+rs1883711+rs2618566	104.074	TRUE	LDL	28.0676	TRUE	Clinical.LDL.Cholesterol	29.3642	TRUE	Phospholipids.in.LDL	.	.	.	29.3642	TRUE	Phospholipids.in.LDL	33.9092	TRUE	Phospholipids.in.Medium.LDL / Histidine	.	.	.	7.16409	Triglycerides to total lipids ratio in large VLDL	11.247	Concentration.of.Large.VLDL.Particles / Triglycerides.in.VLDL	1.29668	0
18:46545976:G:C	167	2218	RP11-15F12.1,RP11-1058N17.1-RP11-15F12.1	MAF<1%	FALSE	FALSE	FALSE	FALSE	FALSE	FALSE	FALSE	FALSE	.	not annotated	0.990503	rs538969346	18	46545976	C	G	1	rs538969346+rs1943977	103.967	TRUE	HDL	34.4969	TRUE	HDL.Cholesterol	60.8298	TRUE	Phosphatidylcholines	.	.	.	60.8298	TRUE	Phosphatidylcholines	74.0246	TRUE	Apolipoprotein.B / Remnant.Cholesterol..Non.HDL..Non.LDL..Cholesterol.	.	.	.	21.1384	Cholesteryl esters to total lipids ratio in small LDL	57.1049	Apolipoprotein.B / Remnant.Cholesterol..Non.HDL..Non.LDL..Cholesterol.	26.3329	0
19:11346155:G:A	168	2304	DOCK6,C19orf80,RN7SL298P	primary	TRUE	TRUE	TRUE	TRUE	TRUE	TRUE	TRUE	TRUE	ANGPTL8	acts as a blood lipid regulator by regulating serum triglyceride levels	0.966011	rs56322906	19	11346155	A	G	3	rs56322906+rs429358+rs116843064+rs367070	103.274	TRUE	HDL	35.5965	TRUE	HDL.Cholesterol	57.742	TRUE	Phosphatidylcholines	26.7597	TRUE	1	57.742	TRUE	Phosphatidylcholines	67.1906	TRUE	Albumin / Phosphatidylcholines	32.2778	TRUE	1	17.8054	Cholesteryl esters to total lipids ratio in small LDL	45.169	Cholesteryl.Esters.in.Small.VLDL / Cholesteryl.Esters.in.VLDL	22.1455	0
12:124409502:G:A	169	1774	DNAH10,RP11-380L11.4,DNAH10OS,CCDC92	r2 = 1 with rs7133378	FALSE	FALSE	FALSE	FALSE	FALSE	FALSE	FALSE	FALSE	.	not annotated	0.682368	rs7133378	12	124409502	A	G	1	rs7133378+rs61941677	102.678	TRUE	HDL	34.5145	TRUE	HDL.Cholesterol	37.8224	TRUE	Cholesteryl.Esters.in.Large.HDL	.	.	.	37.8224	TRUE	Cholesteryl.Esters.in.Large.HDL	46.964	TRUE	Free.Cholesterol.in.Small.HDL / Concentration.of.HDL.Particles	.	.	.	16.7873	Free cholesterol to total lipids ratio in large LDL	34.7032	Free.Cholesterol.in.Small.HDL / Total.Concentration.of.Lipoprotein.Particles	3.30787	0
1:56127473:A:C	170	76	RP11-466L17.1	MAF<1%	FALSE	FALSE	FALSE	FALSE	FALSE	FALSE	FALSE	FALSE	.	not annotated	0.999996	rs148939072	1	56127473	C	A	3	rs148939072+rs28362286+rs12740374+rs34483103	102.124	TRUE	TC	0.460218	FALSE	Total.Cholesterol	1.35905	FALSE	Glycine	.	.	.	1.57117	FALSE	Ratio of omega-3 fatty acids to total fatty acids	2.0044	FALSE	Triglycerides.in.Large.LDL / Omega.3.Fatty.Acids	.	.	.	0.625772	Ratio of omega-3 fatty acids to total fatty acids	1.17358	Polyunsaturated.Fatty.Acids / Omega.6.Fatty.Acids	0.898829	0.212126
7:21605973:A:G	171	1055	DNAH11	r2 = 0.728 with rs56663505	FALSE	FALSE	FALSE	FALSE	FALSE	FALSE	FALSE	FALSE	.	not annotated	0.779815	rs55696093	7	21605973	G	A	1	rs55696093+rs17725246	101.558	TRUE	TC	19.0628	TRUE	Total.Cholesterol	33.2057	TRUE	Cholesteryl.Esters.in.Medium.VLDL	.	.	.	33.2057	TRUE	Cholesteryl.Esters.in.Medium.VLDL	40.8161	TRUE	Phospholipids.in.Small.HDL / Total.Free.Cholesterol	.	.	.	21.3372	Phospholipids to total lipids ratio in large HDL	27.4013	Concentration.of.HDL.Particles / Total.Concentration.of.Lipoprotein.Particles	14.1429	0
19:49206462:C:T	172	2432	FUT2	primary	TRUE	TRUE	TRUE	TRUE	TRUE	TRUE	TRUE	FALSE	.	.	0.492777	rs681343	19	49206462	T	C	5	rs681343+rs7412+rs73015024+rs58542926+rs62116778+rs540662190	100.656	TRUE	LDL	39.7781	TRUE	Clinical.LDL.Cholesterol	64.7507	TRUE	Cholesterol.in.Very.Small.VLDL	9.00037	TRUE	0.89	64.7507	TRUE	Cholesterol.in.Very.Small.VLDL	82.2646	TRUE	Concentration.of.Very.Small.VLDL.Particles / Valine	9.80752	TRUE	1	22.6434	Free cholesterol to total lipids ratio in small HDL	28.4906	Valine / Concentration.of.VLDL.Particles	24.9727	0
2:219699999:G:A	173	479	PRKAG3-AC009974.11,PRKAG3	primary	TRUE	TRUE	TRUE	TRUE	TRUE	TRUE	TRUE	FALSE	.	.	0.963413	rs78058190	2	219699999	A	G	2	rs78058190+rs676210+rs2943645	100.376	TRUE	HDL	14.122	TRUE	HDL.Cholesterol	21.3026	TRUE	Average.Diameter.for.VLDL.Particles	2.43461	FALSE	0.72	24.6716	TRUE	Inverse Ratio of triglycerides to phosphoglycerides	28.6418	TRUE	Triglycerides.in.Small.LDL / Phosphatidylcholines	3.89655	FALSE	0.89	17.4261	Free cholesterol to total lipids ratio in large LDL	23.8544	Cholesterol.in.Small.LDL / Free.Cholesterol.in.Large.LDL	7.18062	3.369
7:21605973:A:G	174	1052	.	duplicate model	FALSE	FALSE	FALSE	FALSE	FALSE	FALSE	FALSE	FALSE	.	not annotated	.	rs55696093	7	21605973	G	A	.	.	100.354	TRUE	LDL	.	.	.	.	.	.	.	.	.	.	.	.	.	.	.	.	.	.	.	.	.	.	.	.
19:44388711:G:C	175	2383	ZNF404	primary	TRUE	TRUE	FALSE	FALSE	FALSE	FALSE	FALSE	FALSE	.	not annotated	0.987718	rs76989105	19	44388711	C	G	10	rs76989105+rs7412+rs73015024+rs58542926+rs62116778+rs540662190+rs681343+rs150262789+rs35081008+rs12720359+rs75916629	100.251	TRUE	LDL	0.866575	FALSE	Clinical.LDL.Cholesterol	2.72538	FALSE	Alanine	.	.	.	2.72538	FALSE	Alanine	2.80779	FALSE	Alanine / Average.Diameter.for.VLDL.Particles	.	.	.	1.27849	Free cholesterol to total lipids ratio in small HDL	2.07072	Phospholipids.in.Chylomicrons.and.Extremely.Large.VLDL / Concentration.of.Chylomicrons.and.Extremely.Large.VLDL.Particles	1.8588	0
19:49206172:C:T	176	2431	FUT2	r2 = 0.998 with rs681343	FALSE	FALSE	FALSE	FALSE	FALSE	FALSE	FALSE	FALSE	.	not annotated	0.492779	rs516246	19	49206172	T	C	4	rs516246+rs7412+rs73015024+rs58542926+rs7255743	99.0343	TRUE	TC	43.0379	TRUE	Total.Cholesterol	64.1194	TRUE	Cholesterol.in.Very.Small.VLDL	.	.	.	64.1194	TRUE	Cholesterol.in.Very.Small.VLDL	81.9923	TRUE	Concentration.of.Very.Small.VLDL.Particles / Valine	.	.	.	22.5676	Free cholesterol to total lipids ratio in small HDL	28.5378	Valine / Concentration.of.VLDL.Particles	21.0815	0
16:81534790:T:C	177	2054	CMIP	r2 = 1 with rs2925979	FALSE	FALSE	FALSE	FALSE	FALSE	FALSE	FALSE	FALSE	.	not annotated	0.301428	rs2925979	16	81534790	C	T	2	rs2925979+rs183130+rs55781197	98.8416	TRUE	HDL	34.2199	TRUE	HDL.Cholesterol	36.4472	TRUE	Cholesteryl.Esters.in.Large.HDL	.	.	.	38.7457	TRUE	Triglycerides to total lipids ratio in small HDL	49.9135	TRUE	Triglycerides.in.Small.VLDL / Monounsaturated.Fatty.Acids	.	.	.	22.3286	Free cholesterol to total lipids ratio in large LDL	32.1248	Free.Cholesterol.in.Small.HDL / Total.Concentration.of.Lipoprotein.Particles	2.22728	2.29849
4:72754788:A:C	178	641	RP11-545L5.1-NPFFR2	r2 = 1 with rs938075289	FALSE	FALSE	FALSE	FALSE	FALSE	FALSE	FALSE	FALSE	.	not annotated	0.999952	rs938075289	4	72754788	C	A	5	rs938075289+rs573930512+rs537526354+rs34707604+rs13108218+rs6054	98.1512	TRUE	nonHDL	0.0956893	FALSE	Total.Cholesterol.Minus.HDL.C	1.82401	FALSE	Acetoacetate	.	.	.	1.82401	FALSE	Acetoacetate	2.18093	FALSE	Acetoacetate / Citrate	.	.	.	0.738622	Triglycerides to total lipids ratio in very large VLDL	1.45993	Phospholipids.in.Large.VLDL / Concentration.of.Very.Large.VLDL.Particles	1.72832	0
20:17844684:G:T	179	2477	AL035045.1-RP5-905G11.3	r2 = 1 with rs2618566	FALSE	FALSE	FALSE	FALSE	FALSE	FALSE	FALSE	FALSE	.	not annotated	0.339564	rs2618566	20	17844684	T	G	3	rs2618566+rs1883711+rs1800961+rs6029549	97.4828	TRUE	TC	24.8003	TRUE	Total.Cholesterol	35.5755	TRUE	Free.Cholesterol.in.IDL	.	.	.	39.4758	TRUE	Phospholipids to total lipids ratio in medium VLDL	53.5777	TRUE	Phospholipids.in.Small.HDL / Total.Esterified.Cholesterol	.	.	.	34.693	Free cholesterol to total lipids ratio in small HDL	39.9695	Free.Cholesterol.in.HDL / Phospholipids.in.HDL	10.7752	3.90027
6:32441046:G:A	180	882	HLA-DRB9	primary	TRUE	TRUE	TRUE	TRUE	TRUE	TRUE	FALSE	FALSE	.	.	0.961597	rs9461755	6	32441046	A	G	1	rs9461755+rs998584	97.3747	TRUE	logTG	22.0228	TRUE	Total.Triglycerides	26.3978	TRUE	Free.Cholesterol.in.Very.Large.VLDL	7.3204	TRUE	0.8	26.3978	TRUE	Free.Cholesterol.in.Very.Large.VLDL	37.7377	TRUE	Cholesteryl.Esters.in.VLDL / Remnant.Cholesterol..Non.HDL..Non.LDL..Cholesterol.	10.746	TRUE	0.98	18.8456	Cholesterol to total lipids ratio in IDL	30.3255	Total.Esterified.Cholesterol / Total.Cholesterol	4.37495	0
16:72088461:A:C	181	2029	TXNL4B,HP,HPR	MAF<1%	FALSE	FALSE	FALSE	FALSE	FALSE	FALSE	FALSE	FALSE	.	not annotated	0.999974	rs5471	16	72088461	C	A	0	rs5471	96.4042	TRUE	TC	0.240899	FALSE	Total.Cholesterol	1.77947	FALSE	Triglycerides.in.Large.HDL	.	.	.	1.77947	FALSE	Triglycerides.in.Large.HDL	2.37839	FALSE	Triglycerides.in.Large.HDL / Creatinine	.	.	.	1.40358	Free cholesterol to total lipids ratio in IDL	1.51625	Free.Cholesterol.in.Large.LDL / Total.Free.Cholesterol	1.53858	0
12:121416650:A:C	182	1761	HNF1A-AS1,HNF1A	primary	TRUE	TRUE	TRUE	TRUE	TRUE	TRUE	FALSE	FALSE	.	.	0.688512	rs1169288	12	121416650	C	A	0	rs1169288	95.2779	TRUE	LDL	22.7789	TRUE	Clinical.LDL.Cholesterol	70.9095	TRUE	Cholesteryl.Esters.in.Very.Small.VLDL	8.38041	TRUE	0.98	70.9095	TRUE	Cholesteryl.Esters.in.Very.Small.VLDL	81.085	TRUE	Tyrosine / Valine	11.287	TRUE	1	28.3821	Phospholipids to total lipids ratio in medium VLDL	45.2351	Free.Cholesterol.in.Medium.LDL / Clinical.LDL.Cholesterol	48.1306	0
4:74512280:G:A	183	650	RASSF6-AC112518.3	r2 = 1 with rs573930512	FALSE	FALSE	FALSE	FALSE	FALSE	FALSE	FALSE	FALSE	.	not annotated	0.999614	rs573930512	4	74512280	A	G	0	rs573930512	95.0352	TRUE	TC	4.46865	FALSE	Total.Cholesterol	49.5298	TRUE	Albumin	.	.	.	49.5298	TRUE	Albumin	49.6326	TRUE	Albumin / Average.Diameter.for.HDL.Particles	.	.	.	2.16232	Triglycerides to total lipids ratio in chylomicrons and extremely large VLDL	3.53851	Total.Lipids.in.Chylomicrons.and.Extremely.Large.VLDL / Concentration.of.Chylomicrons.and.Extremely.Large.VLDL.Particles	45.0611	0
12:121416650:A:C	184	1763	.	duplicate model	FALSE	FALSE	FALSE	FALSE	FALSE	FALSE	FALSE	FALSE	.	not annotated	.	rs1169288	12	121416650	C	A	.	.	94.5981	TRUE	TC	.	.	.	.	.	.	.	.	.	.	.	.	.	.	.	.	.	.	.	.	.	.	.	.
6:16131156:T:C	185	826	MYLIP	r2 = 1 with rs2235215	FALSE	FALSE	FALSE	FALSE	FALSE	FALSE	FALSE	FALSE	.	not annotated	0.699224	rs2235215	6	16131156	C	T	1	rs2235215+rs10455872	94.3382	TRUE	LDL	24.2204	TRUE	Clinical.LDL.Cholesterol	29.8762	TRUE	Cholesteryl.Esters.in.Medium.VLDL	.	.	.	29.8762	TRUE	Cholesteryl.Esters.in.Medium.VLDL	34.1923	TRUE	Concentration.of.Small.HDL.Particles / Phospholipids.in.Large.LDL	.	.	.	10.1471	Free cholesterol to total lipids ratio in large HDL	22.2356	Concentration.of.HDL.Particles / Total.Concentration.of.Lipoprotein.Particles	5.65582	0
7:44581986:T:C	186	1079	NPC1L1,NPC1L1-DDX56	primary	TRUE	TRUE	TRUE	TRUE	TRUE	TRUE	FALSE	TRUE	NPC1L1	takes up free cholesterol into cells through vesicular endocytosis and plays a critical role in the absorption of intestinal cholesterol; target of ezetimibe	0.817666	rs17725246	7	44581986	C	T	0	rs17725246	94.1949	TRUE	LDL	22.5693	TRUE	Clinical.LDL.Cholesterol	30.2187	TRUE	Concentration.of.IDL.Particles	4.3452	TRUE	0.43	30.2187	TRUE	Concentration.of.IDL.Particles	39.4764	TRUE	Concentration.of.VLDL.Particles / VLDL.Cholesterol	4.7831	TRUE	0.67	18.0494	Phospholipids to total lipids ratio in very large VLDL	23.4053	Concentration.of.HDL.Particles / Total.Concentration.of.Lipoprotein.Particles	7.64936	0
5:55861464:C:T	187	734	AC022431.2	primary	TRUE	TRUE	TRUE	TRUE	TRUE	TRUE	TRUE	FALSE	.	.	0.809159	rs28650790	5	55861464	T	C	1	rs28650790+rs6882076	94.1169	TRUE	logTG	42.8916	TRUE	Total.Triglycerides	46.5638	TRUE	Phospholipids.in.Large.VLDL	11.5932	TRUE	1	46.5638	TRUE	Phospholipids.in.Large.VLDL	54.0584	TRUE	Free.Cholesterol.in.Large.VLDL / Glycoprotein.Acetyls	11.545	TRUE	1	24.2887	Free cholesterol to total lipids ratio in large LDL	47.6267	Free.Cholesterol.in.Small.HDL / Concentration.of.HDL.Particles	3.67225	0
6:32627700:A:G	188	888	.	duplicate model	FALSE	FALSE	FALSE	FALSE	FALSE	FALSE	FALSE	FALSE	.	not annotated	.	rs6689	6	32627700	G	A	.	.	93.8356	TRUE	nonHDL	.	.	.	.	.	.	.	.	.	.	.	.	.	.	.	.	.	.	.	.	.	.	.	.
8:18272535:C:T	189	1181	NAT2-PSD3	primary	TRUE	TRUE	TRUE	TRUE	TRUE	TRUE	TRUE	TRUE	NAT2	NAT2 deficiency is associated with ectopic lipid-induced insulin resistance, elevated fasting blood glucose, insulin, and triglycerides levels and reduced insulin sensitivity	0.221374	rs35246381	8	18272535	T	C	2	rs35246381+rs328+rs28601761	93.3788	TRUE	logTG	26.2696	TRUE	Total.Triglycerides	45.2524	TRUE	Triglycerides.in.Medium.HDL	3.87937	FALSE	1	45.2524	TRUE	Triglycerides.in.Medium.HDL	71.6335	TRUE	Triglycerides.in.Medium.HDL / Tyrosine	8.20124	TRUE	1	23.3984	Phospholipids to total lipids ratio in small LDL	39.0714	Cholesterol.in.Large.HDL / Concentration.of.Large.HDL.Particles	18.9827	0
6:43757896:C:A	190	924	VEGFA-RP11-344J7.2,VEGFA	r2 = 1 with rs998584	FALSE	FALSE	FALSE	FALSE	FALSE	FALSE	FALSE	FALSE	.	not annotated	0.518765	rs998584	6	43757896	A	C	0	rs998584	93.2564	TRUE	logTG	28.6565	TRUE	Total.Triglycerides	33.3503	TRUE	Average.Diameter.for.VLDL.Particles	.	.	.	34.8513	TRUE	Inverse Ratio of triglycerides to phosphoglycerides	43.8006	TRUE	Free.Cholesterol.in.Small.HDL / Total.Concentration.of.Lipoprotein.Particles	.	.	.	19.5028	Free cholesterol to total lipids ratio in large LDL	40.6977	Free.Cholesterol.in.Small.HDL / Total.Concentration.of.Lipoprotein.Particles	4.69381	1.50092
2:219699999:G:A	191	481	PRKAG3-AC009974.11,PRKAG3	r2 = 1 with rs78058190	FALSE	FALSE	FALSE	FALSE	FALSE	FALSE	FALSE	FALSE	.	not annotated	0.963413	rs78058190	2	219699999	A	G	4	rs78058190+rs1260326+rs676210+rs1024137+rs13389219	92.9957	TRUE	logTG	18.3785	TRUE	Total.Triglycerides	21.2159	TRUE	Average.Diameter.for.VLDL.Particles	.	.	.	24.6064	TRUE	Inverse Ratio of triglycerides to phosphoglycerides	28.5763	TRUE	Triglycerides.in.Small.LDL / Phosphatidylcholines	.	.	.	17.2935	Free cholesterol to total lipids ratio in large LDL	23.8229	Cholesterol.in.Small.LDL / Free.Cholesterol.in.Large.LDL	2.83749	3.39051
6:43757896:C:A	192	923	VEGFA-RP11-344J7.2,VEGFA	primary	TRUE	TRUE	TRUE	TRUE	TRUE	TRUE	FALSE	TRUE	VEGFA	VEGF-A influences Endothelial Lipase activity	0.518765	rs998584	6	43757896	A	C	1	rs998584+rs41272086	92.7496	TRUE	HDL	19.6838	TRUE	HDL.Cholesterol	33.4595	TRUE	Average.Diameter.for.VLDL.Particles	6.11093	TRUE	0.96	34.9741	TRUE	Inverse Ratio of triglycerides to phosphoglycerides	43.9398	TRUE	Free.Cholesterol.in.Small.HDL / Total.Concentration.of.Lipoprotein.Particles	11.651	TRUE	1	19.6121	Free cholesterol to total lipids ratio in large LDL	40.8364	Free.Cholesterol.in.Small.HDL / Total.Concentration.of.Lipoprotein.Particles	13.7757	1.51466
1:27688814:C:T	193	30	MAP3K6	r2 = 1 with rs41309280	FALSE	FALSE	FALSE	FALSE	FALSE	FALSE	FALSE	FALSE	.	not annotated	0.963219	rs41309280	1	27688814	T	C	12	rs41309280+rs12740374+rs11591147+rs10889333+rs556107+rs114165349+rs557402933+rs9438905+rs186538116+rs2642438+rs2031494+rs10779835+rs191875604	92.6162	TRUE	nonHDL	0.348311	FALSE	Total.Cholesterol.Minus.HDL.C	4.69142	FALSE	Citrate	.	.	.	4.69142	FALSE	Citrate	4.81797	FALSE	Citrate / Degree.of.Unsaturation	.	.	.	1.81046	Cholesteryl esters to total lipids ratio in large LDL	1.81046	Cholesteryl.Esters.in.Large.LDL / Total.Lipids.in.Large.LDL	4.34311	0
11:45913607:G:A	194	1511	MAPK8IP1	primary	TRUE	TRUE	FALSE	FALSE	FALSE	FALSE	FALSE	FALSE	.	not annotated	0.937778	rs77403571	11	45913607	A	G	10	rs77403571+rs964184+rs192489212+rs174564+rs10838684+rs6589939+rs11229252+rs673335+rs56271783+rs73632737+rs150090666	92.0773	TRUE	HDL	2.29847	FALSE	HDL.Cholesterol	3.32782	FALSE	Triglycerides.in.Small.HDL	.	.	.	4.29225	FALSE	Triglycerides to total lipids ratio in small HDL	4.87022	FALSE	Triglycerides.in.Small.HDL / Polyunsaturated.Fatty.Acids	.	.	.	2.60064	Free cholesterol to total lipids ratio in medium LDL	3.39294	Phospholipids.in.IDL / Concentration.of.Very.Small.VLDL.Particles	1.02935	0.964437
17:76402105:A:T	195	2201	PGS1	r2 = 0.993 with rs11657987	FALSE	FALSE	FALSE	FALSE	FALSE	FALSE	FALSE	FALSE	.	not annotated	0.504014	rs2376583	17	76402105	T	A	1	rs2376583+rs72836561	92.0297	TRUE	HDL	20.6796	TRUE	HDL.Cholesterol	27.5365	TRUE	Total.Concentration.of.Lipoprotein.Particles	.	.	.	27.5365	TRUE	Total.Concentration.of.Lipoprotein.Particles	35.6921	TRUE	Albumin / Total.Concentration.of.Lipoprotein.Particles	.	.	.	21.3008	Phospholipids to total lipids ratio in small VLDL	24.6228	Phospholipids.in.Small.VLDL / Concentration.of.Small.VLDL.Particles	6.85693	0
6:27067657:A:T	196	848	VN1R11P-RNU2-62P	r2 = 1 with rs35657082	FALSE	FALSE	FALSE	FALSE	FALSE	FALSE	FALSE	FALSE	.	not annotated	0.911991	rs35657082	6	27067657	T	A	23	rs35657082+rs10455872+rs6689+rs78425119+rs2235215+rs80215559+rs998584+rs9402685+rs17789218+rs1265097+rs2982521+rs141783576+rs3128759+rs1544155+rs148349043+rs6458949+rs72974722+rs9378220+rs6913325+rs6917150+rs1415700+rs3800461+rs1871859+rs913499	91.7773	TRUE	nonHDL	0.0440219	FALSE	Total.Cholesterol.Minus.HDL.C	2.10992	FALSE	Acetate	.	.	.	2.10992	FALSE	Acetate	2.75214	FALSE	Acetate / Phenylalanine	.	.	.	1.62553	Cholesterol to total lipids ratio in medium LDL	1.86981	Cholesteryl.Esters.in.Small.LDL / Cholesterol.in.Medium.LDL	2.0659	0
4:69491284:A:T	197	631	RP11-1267H10.3,RP11-1267H10.1-RP11-1267H10.3	r2 = 0.995 with rs34707604	FALSE	FALSE	FALSE	FALSE	FALSE	FALSE	FALSE	FALSE	.	not annotated	0.755253	rs4860987	4	69491284	T	A	2	rs4860987+rs573930512+rs537526354	91.7721	TRUE	TC	23.2368	TRUE	Total.Cholesterol	34.0626	TRUE	Omega.3.Fatty.Acids	.	.	.	34.0626	TRUE	Omega.3.Fatty.Acids	36.9562	TRUE	Albumin / Omega.3.Fatty.Acids	.	.	.	5.2015	Triglycerides to total lipids ratio in large VLDL	29.4443	Cholesteryl.Esters.in.Medium.HDL / Cholesterol.in.Medium.HDL	10.8259	0
1:109817838:T:C	198	156	.	duplicate model	FALSE	FALSE	FALSE	FALSE	FALSE	FALSE	FALSE	FALSE	.	not annotated	.	rs660240	1	109817838	C	T	.	.	91.745	TRUE	LDL	.	.	.	.	.	.	.	.	.	.	.	.	.	.	.	.	.	.	.	.	.	.	.	.
2:27730940:T:C	199	341	.	duplicate model	FALSE	FALSE	FALSE	FALSE	FALSE	FALSE	FALSE	FALSE	.	not annotated	.	rs1260326	2	27730940	C	T	.	.	91.7144	TRUE	LDL	.	.	.	.	.	.	.	.	.	.	.	.	.	.	.	.	.	.	.	.	.	.	.	.
8:19836984:C:T	200	1199	LPL-AC100802.3	r2 = 0.959 with rs328	FALSE	FALSE	FALSE	FALSE	FALSE	FALSE	FALSE	FALSE	.	not annotated	0.902516	rs74855321	8	19836984	T	C	0	rs74855321	91.6259	TRUE	logTG	360.251	TRUE	Total.Triglycerides	437.721	TRUE	Triglycerides.in.Small.VLDL	.	.	.	509.492	TRUE	Triglycerides to total lipids ratio in small HDL	602.008	TRUE	Triglycerides.in.Small.VLDL / Saturated.Fatty.Acids	.	.	.	376.423	Free cholesterol to total lipids ratio in medium LDL	483.807	Cholesterol.in.IDL / Remnant.Cholesterol..Non.HDL..Non.LDL..Cholesterol.	77.4694	71.7714
19:45412079:C:T	201	2400	.	duplicate model	FALSE	FALSE	FALSE	FALSE	FALSE	FALSE	FALSE	FALSE	.	not annotated	.	rs7412	19	45412079	T	C	.	.	91.2549	TRUE	LDL	.	.	.	.	.	.	.	.	.	.	.	.	.	.	.	.	.	.	.	.	.	.	.	.
1:27688814:C:T	202	29	MAP3K6	r2 = 1 with rs41309280	FALSE	FALSE	FALSE	FALSE	FALSE	FALSE	FALSE	FALSE	.	not annotated	0.963219	rs41309280	1	27688814	T	C	11	rs41309280+rs12740374+rs11591147+rs553427+rs598253+rs557402933+rs186538116+rs10903129+rs114165349+rs2642438+rs2391159+rs191875604	90.7423	TRUE	LDL	0.236852	FALSE	Clinical.LDL.Cholesterol	4.69918	FALSE	Citrate	.	.	.	4.69918	FALSE	Citrate	4.81662	FALSE	Citrate / Degree.of.Unsaturation	.	.	.	1.80255	Cholesteryl esters to total lipids ratio in large LDL	1.80255	Cholesteryl.Esters.in.Large.LDL / Total.Lipids.in.Large.LDL	4.46233	0
6:26093141:G:A	203	844	HFE	primary	TRUE	TRUE	TRUE	TRUE	TRUE	TRUE	FALSE	FALSE	.	.	0.92158	rs1800562	6	26093141	A	G	2	rs1800562+rs10455872+rs2235215	90.2916	TRUE	LDL	32.7034	TRUE	Clinical.LDL.Cholesterol	41.8462	TRUE	Free.Cholesterol.in.Small.LDL	4.6552	TRUE	0.98	44.0605	TRUE	Phospholipids to total lipids ratio in small HDL	49.4114	TRUE	Phosphatidylcholines / Total.Esterified.Cholesterol	4.82497	TRUE	0.99	41.3694	Phospholipids to total lipids ratio in small HDL	42.4857	Free.Cholesterol.in.Small.HDL / Phospholipids.in.Small.HDL	9.14287	2.21421
19:45413233:G:T	204	2407	.	duplicate model	FALSE	FALSE	FALSE	FALSE	FALSE	FALSE	FALSE	FALSE	.	not annotated	.	rs1065853	19	45413233	T	G	.	.	89.9438	TRUE	LDL	.	.	.	.	.	.	.	.	.	.	.	.	.	.	.	.	.	.	.	.	.	.	.	.
17:64210580:A:C	205	2161	APOH	primary	TRUE	TRUE	TRUE	TRUE	TRUE	TRUE	TRUE	TRUE	APOH	Apolipoprotein H has been implicated in a variety of physiologic pathways including lipoprotein metabolism, coagulation, and the production of antiphospholipid autoantibodies.	0.970231	rs1801689	17	64210580	C	A	2	rs1801689+rs77542162+rs186021206	89.5719	TRUE	LDL	16.3879	TRUE	Clinical.LDL.Cholesterol	63.996	TRUE	Average.Diameter.for.VLDL.Particles	9.38929	TRUE	0.99	91.0112	TRUE	Cholesteryl esters to total lipids ratio in large VLDL	108.944	TRUE	Triglycerides.in.Large.LDL / Monounsaturated.Fatty.Acids	17.7113	TRUE	1	70.3868	Phospholipids to total lipids ratio in medium VLDL	98.2884	Total.Lipids.in.VLDL / Phospholipids.in.VLDL	47.6081	27.0152
10:65191645:G:T	206	1410	PRELID1P3,JMJD1C	r2 = 1 with rs7924036	FALSE	FALSE	FALSE	FALSE	FALSE	FALSE	FALSE	FALSE	.	not annotated	0.497609	rs7924036	10	65191645	T	G	1	rs7924036+rs2068888	89.3045	TRUE	logTG	33.0455	TRUE	Total.Triglycerides	52.7037	TRUE	Degree.of.Unsaturation	.	.	.	79.426	TRUE	Cholesteryl esters to total lipids ratio in very small VLDL	105.735	TRUE	Cholesterol.in.IDL / Total.Free.Cholesterol	.	.	.	66.9595	Cholesterol to total lipids ratio in very small VLDL	80.3628	Total.Lipids.in.IDL / Total.Free.Cholesterol	19.6582	26.7223
8:19830921:C:T	207	1198	LPL-AC100802.3	r2 = 0.795 with rs328	FALSE	FALSE	FALSE	FALSE	FALSE	FALSE	FALSE	FALSE	.	not annotated	0.8771	rs10096633	8	19830921	T	C	0	rs10096633	89.2851	TRUE	logTG	355.035	TRUE	Total.Triglycerides	434.359	TRUE	Triglycerides.in.Small.VLDL	.	.	.	516.448	TRUE	Triglycerides to total lipids ratio in small HDL	603.985	TRUE	Triglycerides.in.Small.VLDL / Saturated.Fatty.Acids	.	.	.	363.441	Free cholesterol to total lipids ratio in medium LDL	485.126	Cholesterol.in.IDL / Remnant.Cholesterol..Non.HDL..Non.LDL..Cholesterol.	79.324	82.0892
7:130424646:G:A	208	1125	KLF14-RP11-36B6.1	primary	TRUE	TRUE	TRUE	TRUE	TRUE	TRUE	FALSE	TRUE	KLF14	transcriptional regulator of PPAR-alpha; influences type 2 diabetes risk via a female-specific effect on adipocyte size and body composition	0.505265	rs11762784	7	130424646	A	G	1	rs11762784+rs55747707	88.6345	TRUE	HDL	17.6213	TRUE	HDL.Cholesterol	32.3628	TRUE	Free.Cholesterol.in.Large.VLDL	6.62737	TRUE	0.94	34.3272	TRUE	Inverse Ratio of triglycerides to phosphoglycerides	54.359	TRUE	Triglycerides.in.Small.LDL / Monounsaturated.Fatty.Acids	10.4553	TRUE	1	16.5481	Triglycerides to total lipids ratio in very large HDL	38.3068	Free.Cholesterol.in.Small.HDL / Total.Concentration.of.Lipoprotein.Particles	14.7415	1.96444
17:5270010:G:A	209	2084	RABEP1,RP11-420A6.2,NUP88	r2 = 0.975 with rs571475342	FALSE	FALSE	FALSE	FALSE	FALSE	FALSE	FALSE	FALSE	.	not annotated	0.995175	rs145437104	17	5270010	A	G	20	rs145437104+rs77542162+rs186021206+rs11869730+rs11657987+rs8178824+rs79202680+rs12945088+rs2270445+rs7216105+rs4485425+rs56336338+rs4795393+rs9894946+rs8073510+rs75910690+rs72836561+rs7212076+rs7212325+rs4480845+rs111589301	88.3536	TRUE	TC	0.18103	FALSE	Total.Cholesterol	1.10472	FALSE	Cholesteryl.Esters.in.HDL	.	.	.	2.16281	FALSE	Phospholipids to total lipids ratio in chylomicrons and extremely large VLDL	3.87277	FALSE	Triglycerides.in.Large.LDL / Saturated.Fatty.Acids	.	.	.	1.99865	Phospholipids to total lipids ratio in chylomicrons and extremely large VLDL	3.00057	Triglycerides.in.Large.LDL / Saturated.Fatty.Acids	0.923692	1.05809
12:109895168:C:G	210	1731	KCTD10,MYO1H	r2 = 0.993 with rs888192	FALSE	FALSE	FALSE	FALSE	FALSE	FALSE	FALSE	FALSE	.	not annotated	0.476374	rs2338104	12	109895168	G	C	2	rs2338104+rs61941677+rs7133378	86.821	TRUE	HDL	22.3081	TRUE	HDL.Cholesterol	27.7936	TRUE	Free.Cholesterol.in.HDL	.	.	.	27.7936	TRUE	Free.Cholesterol.in.HDL	33.0943	TRUE	Degree.of.Unsaturation / Free.Cholesterol.in.HDL	.	.	.	8.34545	Phospholipids to total lipids ratio in large LDL	20.8769	Free.Cholesterol.in.Medium.LDL / Cholesterol.in.Large.LDL	5.48548	0
1:109818530:C:T	211	160	PSRC1,CELSR2-PSRC1,CELSR2	r2 = 0.994 with rs12740374	FALSE	FALSE	FALSE	FALSE	FALSE	FALSE	FALSE	FALSE	.	not annotated	0.222176	rs646776	1	109818530	T	C	2	rs646776+rs10127775+rs3768321	86.4989	TRUE	HDL	0.365371	FALSE	HDL.Cholesterol	501.271	TRUE	Phospholipids.in.Small.LDL	.	.	.	501.271	TRUE	Phospholipids.in.Small.LDL	555.978	TRUE	Phospholipids.in.Small.HDL / Total.Lipids.in.Large.LDL	.	.	.	310.591	Free cholesterol to total lipids ratio in small HDL	421.074	Free.Cholesterol.in.Small.HDL / Phospholipids.in.Small.HDL	500.905	0
2:165528876:C:T	212	458	COBLL1	r2 = 1 with rs13389219	FALSE	FALSE	FALSE	FALSE	FALSE	FALSE	FALSE	FALSE	.	not annotated	0.606245	rs13389219	2	165528876	T	C	3	rs13389219+rs676210+rs2943645+rs78058190	85.4724	TRUE	HDL	20.9373	TRUE	HDL.Cholesterol	52.7734	TRUE	Concentration.of.Very.Large.VLDL.Particles	.	.	.	52.7734	TRUE	Concentration.of.Very.Large.VLDL.Particles	59.4368	TRUE	Concentration.of.Very.Large.VLDL.Particles / Glycine	.	.	.	29.2974	Cholesterol to total lipids ratio in medium HDL	46.4084	Free.Cholesterol.in.Small.HDL / Total.Concentration.of.Lipoprotein.Particles	31.836	0
6:32627700:A:G	213	887	XXbac-BPG254F23.6,HLA-DQB1-AS1,HLA-DQB1	primary	TRUE	TRUE	TRUE	TRUE	TRUE	TRUE	FALSE	FALSE	.	.	0.811861	rs6689	6	32627700	G	A	3	rs6689+rs10455872+rs2235215+rs1800562	85.2076	TRUE	LDL	27.0214	TRUE	Clinical.LDL.Cholesterol	53.9902	TRUE	Cholesteryl.Esters.in.VLDL	11.2238	TRUE	1	53.9902	TRUE	Cholesteryl.Esters.in.VLDL	67.3969	TRUE	Phospholipids.in.Large.LDL / Cholesterol.in.Medium.VLDL	11.5575	TRUE	1	14.5011	Phospholipids to total lipids ratio in very large VLDL	33.7438	Concentration.of.HDL.Particles / Total.Concentration.of.Lipoprotein.Particles	26.9688	0
4:87240157:C:T	214	660	MAPK10	primary	TRUE	TRUE	FALSE	FALSE	FALSE	FALSE	FALSE	FALSE	.	not annotated	0.635118	rs17449582	4	87240157	T	C	6	rs17449582+rs13108218+rs17605615+rs114816312+rs13107325+rs138307849+rs6448429	84.3958	TRUE	logTG	2.18273	FALSE	Total.Triglycerides	3.11607	FALSE	Triglycerides.in.Medium.LDL	.	.	.	3.11607	FALSE	Triglycerides.in.Medium.LDL	4.00473	FALSE	Triglycerides.in.Medium.LDL / Triglycerides.in.LDL	.	.	.	1.75356	Free cholesterol to total lipids ratio in large LDL	2.94779	Phospholipids.in.Large.LDL / Total.Lipids.in.LDL	0.933342	0
9:107661742:A:C	215	1338	.	duplicate model	FALSE	FALSE	FALSE	FALSE	FALSE	FALSE	FALSE	FALSE	.	not annotated	.	rs2740488	9	107661742	C	A	.	.	84.332	TRUE	HDL	.	.	.	.	.	.	.	.	.	.	.	.	.	.	.	.	.	.	.	.	.	.	.	.
19:44296689:G:A	216	2381	KCNN4-AC115522.3,AC115522.3,LYPD5	primary	TRUE	TRUE	FALSE	FALSE	FALSE	FALSE	FALSE	FALSE	.	not annotated	0.964187	rs62116988	19	44296689	A	G	12	rs62116988+rs7412+rs73015024+rs58542926+rs7255743+rs62116778+rs681343+rs35081008+rs75916629+rs12720359+rs116843064+rs753931089+rs142385484	83.9245	TRUE	nonHDL	0.00272105	FALSE	Total.Cholesterol.Minus.HDL.C	2.36352	FALSE	Triglycerides.in.Chylomicrons.and.Extremely.Large.VLDL	.	.	.	2.52125	FALSE	Triglycerides to total lipids ratio in chylomicrons and extremely large VLDL	3.55228	FALSE	Triglycerides.in.Chylomicrons.and.Extremely.Large.VLDL / Glycine	.	.	.	1.6689	Phospholipids to total lipids ratio in medium HDL	2.66398	Triglycerides.in.Small.LDL / Triglycerides.in.Medium.LDL	2.36079	0.157736
5:156390297:T:C	217	800	TIMD4,TIMD4-HAVCR1	r2 = 0.899 with rs4704834	FALSE	FALSE	FALSE	FALSE	FALSE	FALSE	FALSE	FALSE	.	not annotated	0.363951	rs6882076	5	156390297	C	T	0	rs6882076	83.9093	TRUE	logTG	35.867	TRUE	Total.Triglycerides	65.4595	TRUE	Concentration.of.Large.LDL.Particles	.	.	.	65.4595	TRUE	Concentration.of.Large.LDL.Particles	75.8292	TRUE	Phospholipids.in.Large.LDL / Cholesterol.in.Medium.VLDL	.	.	.	12.3063	Free cholesterol to total lipids ratio in large HDL	37.0716	Concentration.of.HDL.Particles / Total.Concentration.of.Lipoprotein.Particles	29.5926	0
19:49206462:C:T	218	2433	FUT2	r2 = 1 with rs681343	FALSE	FALSE	FALSE	FALSE	FALSE	FALSE	FALSE	FALSE	.	not annotated	0.492777	rs681343	19	49206462	T	C	5	rs681343+rs7412+rs73015024+rs58542926+rs7255743+rs62116778	83.7167	TRUE	nonHDL	46.3298	TRUE	Total.Cholesterol.Minus.HDL.C	64.7541	TRUE	Cholesterol.in.Very.Small.VLDL	.	.	.	64.7541	TRUE	Cholesterol.in.Very.Small.VLDL	82.2713	TRUE	Concentration.of.Very.Small.VLDL.Particles / Valine	.	.	.	22.6438	Free cholesterol to total lipids ratio in small HDL	28.4936	Valine / Concentration.of.VLDL.Particles	18.4243	0
1:55529215:C:A	219	72	.	duplicate model	FALSE	FALSE	FALSE	FALSE	FALSE	FALSE	FALSE	FALSE	.	not annotated	.	rs28362286	1	55529215	A	C	.	.	83.4935	TRUE	nonHDL	.	.	.	.	.	.	.	.	.	.	.	.	.	.	.	.	.	.	.	.	.	.	.	.
17:37810218:C:G	220	2118	STARD3	r2 = 0.996 with rs931992	FALSE	FALSE	FALSE	FALSE	FALSE	FALSE	FALSE	FALSE	.	not annotated	0.333812	rs881844	17	37810218	G	C	2	rs881844+rs72836561+rs2376583	82.7645	TRUE	HDL	24.224	TRUE	HDL.Cholesterol	27.9287	TRUE	Concentration.of.Large.HDL.Particles	.	.	.	31.9509	TRUE	Free cholesterol to total lipids ratio in very large HDL	36.3951	TRUE	Free.Cholesterol.in.Very.Large.HDL / Concentration.of.Very.Large.HDL.Particles	.	.	.	14.0349	Free cholesterol to total lipids ratio in very large HDL	19.5078	Triglycerides.in.Small.HDL / Monounsaturated.Fatty.Acids	3.70467	4.02219
1:25766623:A:G	221	17	TMEM57	primary	TRUE	TRUE	TRUE	TRUE	TRUE	TRUE	FALSE	TRUE	LDLRAP1	low density lipoprotein receptor adapter protein 1	0.442739	rs35148262	1	25766623	G	A	4	rs35148262+rs12740374+rs11591147+rs11207980+rs2587534	82.556	TRUE	TC	25.2035	TRUE	Total.Cholesterol	29.3014	TRUE	Cholesteryl.Esters.in.Medium.VLDL	8.2918	TRUE	0.52	29.3014	TRUE	Cholesteryl.Esters.in.Medium.VLDL	37.9049	TRUE	Total.Lipids.in.Small.HDL / Total.Cholesterol	8.20798	TRUE	0.75	20.3733	Free cholesterol to total lipids ratio in small HDL	26.4844	Triglycerides.in.Small.HDL / Phospholipids.in.VLDL	4.0979	0
7:44581986:T:C	222	1081	.	duplicate model	FALSE	FALSE	FALSE	FALSE	FALSE	FALSE	FALSE	FALSE	.	not annotated	.	rs17725246	7	44581986	C	T	.	.	82.4236	TRUE	TC	.	.	.	.	.	.	.	.	.	.	.	.	.	.	.	.	.	.	.	.	.	.	.	.
7:21605973:A:G	223	1054	.	duplicate model	FALSE	FALSE	FALSE	FALSE	FALSE	FALSE	FALSE	FALSE	.	not annotated	.	rs55696093	7	21605973	G	A	.	.	82.27	TRUE	nonHDL	.	.	.	.	.	.	.	.	.	.	.	.	.	.	.	.	.	.	.	.	.	.	.	.
6:161008646:G:A	224	1009	LPA	r2 = 1 with rs41272086	FALSE	FALSE	FALSE	FALSE	FALSE	FALSE	FALSE	FALSE	.	not annotated	0.892662	rs41272086	6	161008646	A	G	0	rs41272086	82.1158	TRUE	HDL	28.6137	TRUE	HDL.Cholesterol	50.7569	TRUE	Triglycerides.in.Small.HDL	.	.	.	64.7472	TRUE	Cholesterol to total lipids ratio in large HDL	71.6411	TRUE	Triglycerides.in.Small.HDL / Total.Lipids.in.Lipoprotein.Particles	.	.	.	43.1125	Cholesterol to total lipids ratio in very small VLDL	57.4957	Free.Cholesterol.in.Small.VLDL / Cholesterol.in.Small.VLDL	22.1432	13.9903
20:17844684:G:T	225	2476	.	duplicate model	FALSE	FALSE	FALSE	FALSE	FALSE	FALSE	FALSE	FALSE	.	not annotated	.	rs2618566	20	17844684	T	G	.	.	81.8041	TRUE	nonHDL	.	.	.	.	.	.	.	.	.	.	.	.	.	.	.	.	.	.	.	.	.	.	.	.
20:39760448:C:G	226	2501	RP1-1J6.2	r2 = 0.968 with rs4812493	FALSE	FALSE	FALSE	FALSE	FALSE	FALSE	FALSE	FALSE	.	not annotated	0.523465	rs6029552	20	39760448	G	C	2	rs6029552+rs1883711+rs2618566	81.4389	TRUE	nonHDL	28.0669	TRUE	Total.Cholesterol.Minus.HDL.C	29.3376	TRUE	Phospholipids.in.LDL	.	.	.	29.3376	TRUE	Phospholipids.in.LDL	33.8779	TRUE	Phospholipids.in.Medium.LDL / Histidine	.	.	.	7.22302	Triglycerides to total lipids ratio in large VLDL	11.2713	Concentration.of.Large.VLDL.Particles / Triglycerides.in.VLDL	1.27063	0
19:11242307:G:C	227	2302	LDLR,SPC24	primary	TRUE	TRUE	FALSE	TRUE	TRUE	TRUE	FALSE	FALSE	LDLR (2)	secondary association with LPmtr gene	0.120987	rs2738464	19	11242307	C	G	1	rs2738464+rs1065853	81.1681	TRUE	TC	5.2391	FALSE	Total.Cholesterol	11.5122	TRUE	Cholesteryl.Esters.in.Medium.VLDL	12.5329	TRUE	0.08	11.5122	TRUE	Cholesteryl.Esters.in.Medium.VLDL	14.59	TRUE	Cholesteryl.Esters.in.Medium.VLDL / Total.Fatty.Acids	13.2273	TRUE	0.2	8.8067	Triglycerides to total lipids ratio in small VLDL	13.1512	Total.Lipids.in.VLDL / Total.Triglycerides	6.27315	0
19:10584985:G:A	228	2287	PDE4A-KEAP1,PDE4A	MAF<1%	FALSE	FALSE	FALSE	FALSE	FALSE	FALSE	FALSE	FALSE	.	not annotated	0.999978	rs562149929	19	10584985	A	G	2	rs562149929+rs7412+rs138294113	81.068	TRUE	LDL	0.881058	FALSE	Clinical.LDL.Cholesterol	2.13383	FALSE	Lactate	.	.	.	2.13383	FALSE	Lactate	3.10674	FALSE	Creatinine / Lactate	.	.	.	0.306479	Cholesterol to total lipids ratio in very large HDL	1.15588	Leucine / Isoleucine	1.25277	0
8:9183596:A:G	229	1152	RP11-115J16.1	r2 = 0.978 with rs111675407	FALSE	FALSE	FALSE	FALSE	FALSE	FALSE	FALSE	FALSE	.	not annotated	0.0923372	rs4841132	8	9183596	G	A	3	rs4841132+rs28601761+rs9297994+rs15285	80.7399	TRUE	nonHDL	31.357	TRUE	Total.Cholesterol.Minus.HDL.C	156.036	TRUE	Glycine	.	.	.	156.036	TRUE	Glycine	270.126	TRUE	Glycine / Cholesteryl.Esters.in.HDL	.	.	.	53.3195	Phospholipids to total lipids ratio in very small VLDL	114.09	Glycine / Cholesteryl.Esters.in.HDL	124.679	0
11:126225876:C:G	230	1631	ST3GAL4	primary	TRUE	TRUE	TRUE	TRUE	TRUE	TRUE	TRUE	FALSE	.	.	0.928517	rs112771035	11	126225876	G	C	1	rs112771035+rs964184	80.6696	TRUE	nonHDL	31.0357	TRUE	Total.Cholesterol.Minus.HDL.C	37.8606	TRUE	Concentration.of.IDL.Particles	3.20694	FALSE	0.65	41.8422	TRUE	Inverse Ratio of apolipoprotein B to apolipoprotein A1	59.9158	TRUE	Phospholipids.in.Large.LDL / Total.Esterified.Cholesterol	6.4156	TRUE	1	26.1211	Triglycerides to total lipids ratio in large VLDL	43.5573	Sphingomyelins / Total.Lipids.in.HDL	6.82488	3.98158
8:116658583:G:T	231	1252	TRPS1	r2 = 0.992 with rs2721961	FALSE	FALSE	FALSE	FALSE	FALSE	FALSE	FALSE	FALSE	.	not annotated	0.718823	rs2737245	8	116658583	T	G	4	rs2737245+rs28601761+rs9987289+rs9297994+rs35570672	80.6498	TRUE	TC	19.6375	TRUE	Total.Cholesterol	28.7675	TRUE	Free.Cholesterol.in.Very.Small.VLDL	.	.	.	28.7675	TRUE	Free.Cholesterol.in.Very.Small.VLDL	34.6737	TRUE	Albumin / Polyunsaturated.Fatty.Acids	.	.	.	5.88775	Free cholesterol to total lipids ratio in large HDL	12.5675	Albumin / Polyunsaturated.Fatty.Acids	9.13008	0
6:34595543:T:C	232	898	C6orf106	primary	TRUE	TRUE	TRUE	TRUE	TRUE	TRUE	TRUE	FALSE	.	.	0.642108	rs2263329	6	34595543	C	T	2	rs2263329+rs41272086+rs998584	80.0391	TRUE	HDL	21.1818	TRUE	HDL.Cholesterol	21.1818	TRUE	HDL.Cholesterol	1.84141	FALSE	0.66	24.689	TRUE	Free cholesterol to total lipids ratio in medium HDL	25.6284	TRUE	Free.Cholesterol.in.Medium.HDL / Phospholipids.in.Medium.HDL	1.95162	FALSE	0.82	10.8569	Phospholipids to total lipids ratio in large VLDL	18.1739	Total.Lipids.in.IDL / Concentration.of.IDL.Particles	0	3.50724
12:111884608:T:C	233	1746	SH2B3	r2 = 0.992 with rs597808	FALSE	FALSE	FALSE	FALSE	FALSE	FALSE	FALSE	FALSE	.	not annotated	0.48223	rs3184504	12	111884608	C	T	1	rs3184504+rs1169288	79.6091	TRUE	TC	22.9838	TRUE	Total.Cholesterol	47.0926	TRUE	Lactate	.	.	.	47.0926	TRUE	Lactate	78.1	TRUE	Lactate / Sphingomyelins	.	.	.	9.27037	Phospholipids to total lipids ratio in small VLDL	31.0074	Lactate / Sphingomyelins	24.1088	0
1:109817838:T:C	234	155	.	duplicate model	FALSE	FALSE	FALSE	FALSE	FALSE	FALSE	FALSE	FALSE	.	not annotated	.	rs660240	1	109817838	C	T	.	.	79.413	TRUE	TC	.	.	.	.	.	.	.	.	.	.	.	.	.	.	.	.	.	.	.	.	.	.	.	.
16:72088461:A:C	235	2031	.	duplicate model	FALSE	FALSE	FALSE	FALSE	FALSE	FALSE	FALSE	FALSE	.	not annotated	.	rs5471	16	72088461	C	A	.	.	78.8799	TRUE	LDL	.	.	.	.	.	.	.	.	.	.	.	.	.	.	.	.	.	.	.	.	.	.	.	.
7:44581986:T:C	236	1080	.	duplicate model	FALSE	FALSE	FALSE	FALSE	FALSE	FALSE	FALSE	FALSE	.	not annotated	.	rs17725246	7	44581986	C	T	.	.	78.4151	TRUE	nonHDL	.	.	.	.	.	.	.	.	.	.	.	.	.	.	.	.	.	.	.	.	.	.	.	.
4:74033564:G:C	237	646	ANKRD17	r2 = 0.804 with rs573930512	FALSE	FALSE	FALSE	FALSE	FALSE	FALSE	FALSE	FALSE	.	not annotated	0.999775	rs187918276	4	74033564	C	G	0	rs187918276	77.2842	TRUE	LDL	3.90315	FALSE	Clinical.LDL.Cholesterol	31.1778	TRUE	Albumin	.	.	.	31.1778	TRUE	Albumin	32.568	TRUE	Free.Cholesterol.in.Small.HDL / Albumin	.	.	.	2.11465	Triglycerides to total lipids ratio in chylomicrons and extremely large VLDL	2.97527	Triglycerides.in.Chylomicrons.and.Extremely.Large.VLDL / Concentration.of.Chylomicrons.and.Extremely.Large.VLDL.Particles	27.2747	0
2:21247065:T:A	238	284	APOB	MAF<1%	FALSE	FALSE	FALSE	FALSE	FALSE	FALSE	FALSE	FALSE	.	not annotated	0.999924	rs57825321	2	21247065	A	T	0	rs57825321	77.081	TRUE	TC	0.935961	FALSE	Total.Cholesterol	1.4852	FALSE	Total.Lipids.in.Very.Small.VLDL	.	.	.	1.4852	FALSE	Total.Lipids.in.Very.Small.VLDL	2.069	FALSE	Phospholipids.in.Medium.VLDL / Concentration.of.Medium.VLDL.Particles	.	.	.	0.688881	Cholesteryl esters to total lipids ratio in medium HDL	1.5456	Cholesteryl.Esters.in.HDL / HDL.Cholesterol	0.549234	0
8:18272635:T:C	239	1183	NAT2-PSD3	r2 = 0.997 with rs35246381	FALSE	FALSE	FALSE	FALSE	FALSE	FALSE	FALSE	FALSE	.	not annotated	0.220697	rs35570672	8	18272635	C	T	3	rs35570672+rs28601761+rs9987289+rs9297994	77.0419	TRUE	TC	9.94975	TRUE	Total.Cholesterol	45.0818	TRUE	Triglycerides.in.Medium.HDL	.	.	.	45.0818	TRUE	Triglycerides.in.Medium.HDL	71.5569	TRUE	Triglycerides.in.Medium.HDL / Tyrosine	.	.	.	23.5333	Phospholipids to total lipids ratio in small LDL	38.8614	Cholesterol.in.Large.HDL / Concentration.of.Large.HDL.Particles	35.132	0
1:109817838:T:C	240	157	.	duplicate model	FALSE	FALSE	FALSE	FALSE	FALSE	FALSE	FALSE	FALSE	.	not annotated	.	rs660240	1	109817838	C	T	.	.	76.2164	TRUE	nonHDL	.	.	.	.	.	.	.	.	.	.	.	.	.	.	.	.	.	.	.	.	.	.	.	.
6:16131156:T:C	241	828	MYLIP	r2 = 1 with rs2235215	FALSE	FALSE	FALSE	FALSE	FALSE	FALSE	FALSE	FALSE	.	not annotated	0.699224	rs2235215	6	16131156	C	T	2	rs2235215+rs10455872+rs6689	76.2013	TRUE	TC	17.9116	TRUE	Total.Cholesterol	30.001	TRUE	Cholesteryl.Esters.in.Medium.VLDL	.	.	.	30.001	TRUE	Cholesteryl.Esters.in.Medium.VLDL	34.2835	TRUE	Concentration.of.Small.HDL.Particles / Phospholipids.in.Large.LDL	.	.	.	10.1481	Free cholesterol to total lipids ratio in large HDL	22.3267	Concentration.of.HDL.Particles / Total.Concentration.of.Lipoprotein.Particles	12.0894	0
1:27180088:A:C	242	27	ZDHHC18	r2 = 0.958 with rs114165349	FALSE	FALSE	FALSE	FALSE	FALSE	FALSE	FALSE	FALSE	.	not annotated	0.976418	rs75460349	1	27180088	C	A	3	rs75460349+rs10127775+rs3768321+rs646776	75.9393	TRUE	HDL	17.2222	TRUE	HDL.Cholesterol	32.9444	TRUE	Concentration.of.Small.VLDL.Particles	.	.	.	34.5413	TRUE	Inverse Ratio of apolipoprotein B to apolipoprotein A1	52.4226	TRUE	Phospholipids.in.Medium.HDL / Triglycerides.in.Medium.LDL	.	.	.	11.7604	Inverse Ratio of apolipoprotein B to apolipoprotein A1	33.0855	Phospholipids.in.Medium.HDL / Saturated.Fatty.Acids	15.7222	1.59693
1:25768937:A:G	243	18	TMEM57	r2 = 0.991 with rs35148262	FALSE	FALSE	FALSE	FALSE	FALSE	FALSE	FALSE	FALSE	.	not annotated	0.440332	rs10903129	1	25768937	G	A	6	rs10903129+rs12740374+rs11591147+rs553427+rs598253+rs557402933+rs186538116	75.8962	TRUE	LDL	22.3689	TRUE	Clinical.LDL.Cholesterol	29.3515	TRUE	Cholesteryl.Esters.in.Medium.VLDL	.	.	.	29.3515	TRUE	Cholesteryl.Esters.in.Medium.VLDL	38.2365	TRUE	Cholesteryl.Esters.in.Medium.VLDL / Pyruvate	.	.	.	20.5535	Free cholesterol to total lipids ratio in small HDL	26.4939	Triglycerides.in.Small.HDL / Phospholipids.in.VLDL	6.98254	0
7:25991826:T:C	244	1059	MIR148A-AC004520.1,CTD-2227E11.1,MIR148A	r2 = 1 with rs4722551	FALSE	FALSE	FALSE	FALSE	FALSE	FALSE	FALSE	FALSE	.	not annotated	0.841935	rs4722551	7	25991826	C	T	2	rs4722551+rs17725246+rs55696093	75.8153	TRUE	LDL	13.7925	TRUE	Clinical.LDL.Cholesterol	28.3121	TRUE	Free.Cholesterol.in.Chylomicrons.and.Extremely.Large.VLDL	.	.	.	45.6298	TRUE	Triglycerides to total lipids ratio in small VLDL	56.8055	TRUE	Total.Fatty.Acids / Total.Free.Cholesterol	.	.	.	41.7975	Free cholesterol to total lipids ratio in small VLDL	50.0692	Total.Fatty.Acids / Total.Free.Cholesterol	14.5197	17.3177
2:21247065:T:A	245	283	.	duplicate model	FALSE	FALSE	FALSE	FALSE	FALSE	FALSE	FALSE	FALSE	.	not annotated	.	rs57825321	2	21247065	A	T	.	.	75.5913	TRUE	nonHDL	.	.	.	.	.	.	.	.	.	.	.	.	.	.	.	.	.	.	.	.	.	.	.	.
2:27730940:T:C	246	340	.	duplicate model	FALSE	FALSE	FALSE	FALSE	FALSE	FALSE	FALSE	FALSE	.	not annotated	.	rs1260326	2	27730940	C	T	.	.	74.7509	TRUE	logTG	.	.	.	.	.	.	.	.	.	.	.	.	.	.	.	.	.	.	.	.	.	.	.	.
17:45650196:T:C	247	2141	NPEPPS	r2 = 0.996 with rs2317826	FALSE	FALSE	FALSE	FALSE	FALSE	FALSE	FALSE	FALSE	.	not annotated	0.485654	rs12603290	17	45650196	C	T	3	rs12603290+rs77542162+rs186021206+rs1801689	74.466	TRUE	LDL	40.5703	TRUE	Clinical.LDL.Cholesterol	42.1805	TRUE	Phospholipids.in.Small.LDL	.	.	.	42.1805	TRUE	Phospholipids.in.Small.LDL	64.0883	TRUE	Free.Cholesterol.in.Small.LDL / Glycine	.	.	.	21.3974	Free cholesterol to total lipids ratio in small HDL	31.769	Free.Cholesterol.in.Small.HDL / Phospholipids.in.Small.HDL	1.61021	0
19:11242307:G:C	248	2301	.	duplicate model	FALSE	FALSE	FALSE	FALSE	FALSE	FALSE	FALSE	FALSE	.	not annotated	.	rs2738464	19	11242307	C	G	.	.	74.2147	TRUE	nonHDL	.	.	.	.	.	.	.	.	.	.	.	.	.	.	.	.	.	.	.	.	.	.	.	.
9:109062494:C:A	249	1354	RP11-308N19.1	MAF<1%	FALSE	FALSE	FALSE	FALSE	FALSE	FALSE	FALSE	FALSE	.	not annotated	0.999805	rs535372564	9	109062494	A	C	8	rs535372564+rs2740488+rs686030+rs186793936+rs2519093+rs577703186+rs4741016+rs10733608+rs1412234	74.172	TRUE	HDL	0.815147	FALSE	HDL.Cholesterol	1.6646	FALSE	Pyruvate	.	.	.	1.995	FALSE	Cholesterol to total lipids ratio in medium LDL	2.66819	FALSE	Free.Cholesterol.in.IDL / Pyruvate	.	.	.	1.25162	Cholesterol to total lipids ratio in medium LDL	1.67168	Total.Lipids.in.Small.VLDL / Concentration.of.Small.VLDL.Particles	0.849453	0.330399
4:87996745:G:A	250	664	AFF1	r2 = 0.988 with rs3775228	FALSE	FALSE	FALSE	FALSE	FALSE	FALSE	FALSE	FALSE	.	not annotated	0.601931	rs17605615	4	87996745	A	G	1	rs17605615+rs13108218	74.0232	TRUE	logTG	34.96	TRUE	Total.Triglycerides	40.3444	TRUE	Triglycerides.in.Medium.HDL	.	.	.	42.4605	TRUE	Cholesteryl esters to total lipids ratio in medium HDL	46.115	TRUE	Free.Cholesterol.in.Small.LDL / Free.Cholesterol.in.Small.VLDL	.	.	.	39.1099	Cholesteryl esters to total lipids ratio in medium HDL	39.1099	Cholesteryl.Esters.in.Medium.HDL / Total.Lipids.in.Medium.HDL	5.38438	2.11616
1:110326545:G:A	251	163	GSTM5-NDUFA5P10	primary	TRUE	TRUE	FALSE	FALSE	FALSE	FALSE	FALSE	FALSE	.	not annotated	0.987158	rs140266316	1	110326545	A	G	15	rs140266316+rs12740374+rs11591147+rs553427+rs598253+rs557402933+rs186538116+rs10903129+rs114165349+rs2642438+rs2391159+rs191875604+rs41309280+rs267733+rs1689801+rs1497406	74	TRUE	LDL	0.649573	FALSE	Clinical.LDL.Cholesterol	2.6761	FALSE	Citrate	.	.	.	2.6761	FALSE	Citrate	3.96191	FALSE	Free.Cholesterol.in.Very.Large.HDL / Citrate	.	.	.	1.70861	Free cholesterol to total lipids ratio in large HDL	1.92384	Cholesteryl.Esters.in.Medium.HDL / HDL.Cholesterol	2.02653	0
11:61570783:T:C	252	1530	FADS2,FADS1	r2 = 0.979 with rs174564	FALSE	FALSE	FALSE	FALSE	FALSE	FALSE	FALSE	FALSE	.	not annotated	0.653241	rs174547	11	61570783	C	T	2	rs174547+rs964184+rs112771035	73.8153	TRUE	nonHDL	95.1813	TRUE	Total.Cholesterol.Minus.HDL.C	2985.54	TRUE	Omega.3.Fatty.Acids	.	.	.	4045.19	TRUE	Ratio of omega-3 fatty acids to total fatty acids	5019.75	TRUE	Linoleic.Acid / Polyunsaturated.Fatty.Acids	.	.	.	1059.65	Ratio of omega-3 fatty acids to total fatty acids	4739.28	Linoleic.Acid / Polyunsaturated.Fatty.Acids	2890.36	1059.65
18:47119579:A:G	253	2229	LIPG,LIPG-SMUG1P1	r2 = 0.999 with rs9953437	FALSE	FALSE	FALSE	FALSE	FALSE	FALSE	FALSE	FALSE	.	not annotated	0.958491	rs11082764	18	47119579	G	A	0	rs11082764	73.6613	TRUE	HDL	21.2245	TRUE	HDL.Cholesterol	36.9945	TRUE	Phospholipids.in.Medium.HDL	.	.	.	36.9945	TRUE	Phospholipids.in.Medium.HDL	47.8058	TRUE	Phospholipids.in.Small.LDL / Total.Free.Cholesterol	.	.	.	13.8195	Cholesteryl esters to total lipids ratio in small LDL	40.7276	Apolipoprotein.B / Remnant.Cholesterol..Non.HDL..Non.LDL..Cholesterol.	15.7701	0
1:109310728:G:A	254	143	STXBP3,RP11-475E11.2	primary	TRUE	TRUE	FALSE	FALSE	FALSE	FALSE	FALSE	FALSE	.	not annotated	0.982021	rs115292790	1	109310728	A	G	16	rs115292790+rs12740374+rs11591147+rs553427+rs598253+rs557402933+rs186538116+rs10903129+rs114165349+rs2642438+rs2391159+rs191875604+rs41309280+rs267733+rs1689801+rs1497406+rs140266316	73.3179	TRUE	LDL	1.01152	FALSE	Clinical.LDL.Cholesterol	2.37387	FALSE	Glutamine	.	.	.	2.37387	FALSE	Glutamine	2.54792	FALSE	Omega.6.Fatty.Acids / Average.Diameter.for.VLDL.Particles	.	.	.	1.29903	Cholesterol to total lipids ratio in chylomicrons and extremely large VLDL	1.29903	Cholesterol.in.Chylomicrons.and.Extremely.Large.VLDL / Total.Lipids.in.Chylomicrons.and.Extremely.Large.VLDL	1.36235	0
1:220970028:A:G	255	223	MARC1	r2 = 1 with rs2642438	FALSE	FALSE	FALSE	FALSE	FALSE	FALSE	FALSE	FALSE	.	not annotated	0.296812	rs2642438	1	220970028	G	A	5	rs2642438+rs12740374+rs11591147+rs11207980+rs2587534+rs35148262	72.8447	TRUE	TC	25.5476	TRUE	Total.Cholesterol	38.0539	TRUE	Cholesterol.in.IDL	.	.	.	48.1823	TRUE	Ratio of saturated fatty acids to total fatty acids	56.3175	TRUE	Saturated.Fatty.Acids / Monounsaturated.Fatty.Acids	.	.	.	36.6007	Ratio of saturated fatty acids to total fatty acids	46.821	Concentration.of.Small.VLDL.Particles / Concentration.of.VLDL.Particles	12.5063	10.1283
16:56994528:C:T	256	1991	.	duplicate model	FALSE	FALSE	FALSE	FALSE	FALSE	FALSE	FALSE	FALSE	.	not annotated	.	rs17231506	16	56994528	T	C	.	.	72.3325	TRUE	logTG	.	.	.	.	.	.	.	.	.	.	.	.	.	.	.	.	.	.	.	.	.	.	.	.
2:26924018:C:G	257	332	KCNK3	primary	TRUE	TRUE	FALSE	FALSE	FALSE	FALSE	FALSE	FALSE	.	not annotated	0.958806	rs57035494	2	26924018	G	C	8	rs57035494+rs1260326+rs676210+rs1024137+rs13389219+rs78058190+rs2540949+rs72780006+rs12478327	72.2426	TRUE	logTG	0.127688	FALSE	Total.Triglycerides	2.70437	FALSE	Free.Cholesterol.in.Small.LDL	.	.	.	4.31081	FALSE	Phospholipids to total lipids ratio in small HDL	4.31081	FALSE	Phospholipids.in.Small.HDL / Total.Lipids.in.Small.HDL	.	.	.	3.98911	Phospholipids to total lipids ratio in small HDL	3.98911	Phospholipids.in.Small.HDL / Total.Lipids.in.Small.HDL	2.57668	1.60644
19:44296689:G:A	258	2382	KCNN4-AC115522.3,AC115522.3,LYPD5	r2 = 1 with rs62116988	FALSE	FALSE	FALSE	FALSE	FALSE	FALSE	FALSE	FALSE	.	not annotated	0.964187	rs62116988	19	44296689	A	G	14	rs62116988+rs7412+rs73015024+rs58542926+rs7255743+rs516246+rs62116778+rs75916629+rs35081008+rs12720359+rs142385484+rs1640269+rs1645788+rs3764613+rs753931089	72.0721	TRUE	TC	0.167574	FALSE	Total.Cholesterol	2.41672	FALSE	Triglycerides.in.Chylomicrons.and.Extremely.Large.VLDL	.	.	.	2.50885	FALSE	Cholesteryl esters to total lipids ratio in chylomicrons and extremely large VLDL	3.607	FALSE	Triglycerides.in.Chylomicrons.and.Extremely.Large.VLDL / Glycine	.	.	.	1.71792	Phospholipids to total lipids ratio in medium HDL	2.69944	Triglycerides.in.Small.LDL / Triglycerides.in.Medium.LDL	2.24914	0.0921354
6:160492613:T:C	259	998	IGF2R	primary	TRUE	TRUE	FALSE	TRUE	TRUE	TRUE	FALSE	FALSE	.	.	0.983904	rs2297359	6	160492613	C	T	4	rs2297359+rs10455872+rs2235215+rs1800562+rs6689	71.7423	TRUE	LDL	0.595001	FALSE	Clinical.LDL.Cholesterol	176.726	TRUE	Triglycerides.in.Chylomicrons.and.Extremely.Large.VLDL	8.17577	TRUE	1	176.726	TRUE	Triglycerides.in.Chylomicrons.and.Extremely.Large.VLDL	204.857	TRUE	Triglycerides.in.Chylomicrons.and.Extremely.Large.VLDL / Total.Triglycerides	9.7883	TRUE	1	81.9695	Free cholesterol to total lipids ratio in small LDL	153.921	Triglycerides.in.Large.LDL / Triglycerides.in.LDL	176.131	0
6:139836562:G:A	260	989	RP11-12A2.3-ATP5F1P6	r2 = 0.852 with rs2982521	FALSE	FALSE	FALSE	FALSE	FALSE	FALSE	FALSE	FALSE	.	not annotated	0.408754	rs672457	6	139836562	A	G	3	rs672457+rs998584+rs9461755+rs9468937	71.3706	TRUE	logTG	30.3574	TRUE	Total.Triglycerides	30.8389	TRUE	Triglycerides.in.Small.LDL	.	.	.	31.4678	TRUE	Triglycerides to total lipids ratio in small HDL	35.2261	TRUE	Linoleic.Acid / Total.Lipids.in.VLDL	.	.	.	22.7178	Free cholesterol to total lipids ratio in large LDL	27.0887	Free.Cholesterol.in.Large.LDL / LDL.Cholesterol	0.48141	0.628916
6:25918225:T:C	261	843	SLC17A2	r2 = 0.941 with rs1800562	FALSE	FALSE	FALSE	FALSE	FALSE	FALSE	FALSE	FALSE	.	not annotated	0.922574	rs80215559	6	25918225	C	T	3	rs80215559+rs10455872+rs6689+rs2235215	70.9245	TRUE	TC	20.3217	TRUE	Total.Cholesterol	41.2265	TRUE	Free.Cholesterol.in.Small.LDL	.	.	.	43.6561	TRUE	Phospholipids to total lipids ratio in small HDL	48.8833	TRUE	Phosphatidylcholines / Total.Esterified.Cholesterol	.	.	.	40.7726	Phospholipids to total lipids ratio in small HDL	41.2066	Free.Cholesterol.in.Small.HDL / Phospholipids.in.Small.HDL	20.9049	2.42955
19:10584985:G:A	262	2286	.	duplicate model	FALSE	FALSE	FALSE	FALSE	FALSE	FALSE	FALSE	FALSE	.	not annotated	.	rs562149929	19	10584985	A	G	.	.	70.6596	TRUE	TC	.	.	.	.	.	.	.	.	.	.	.	.	.	.	.	.	.	.	.	.	.	.	.	.
17:45614763:T:A	263	2140	NPEPPS	r2 = 0.994 with rs2317826	FALSE	FALSE	FALSE	FALSE	FALSE	FALSE	FALSE	FALSE	.	not annotated	0.485995	rs11869730	17	45614763	A	T	2	rs11869730+rs77542162+rs186021206	70.2211	TRUE	TC	31.2831	TRUE	Total.Cholesterol	41.8781	TRUE	Phospholipids.in.Small.LDL	.	.	.	41.8781	TRUE	Phospholipids.in.Small.LDL	63.8238	TRUE	Free.Cholesterol.in.Small.LDL / Glycine	.	.	.	21.5524	Free cholesterol to total lipids ratio in small HDL	31.7696	Free.Cholesterol.in.Small.HDL / Phospholipids.in.Small.HDL	10.595	0
12:111377530:C:T	264	1740	RP1-46F2.2	r2 = 0.985 with rs4766519	FALSE	FALSE	FALSE	FALSE	FALSE	FALSE	FALSE	FALSE	.	not annotated	0.483643	rs12580337	12	111377530	T	C	19	rs12580337+rs1169288+rs3184504+rs4883201+rs28866344+rs76895963+rs888192+rs921919+rs111299924+rs75667995+rs10876171+rs35882350+rs10843390+rs75588192+rs11066412+rs2516079+rs61754230+rs11175540+rs11837065+rs1196760	69.6655	TRUE	TC	0.000759266	FALSE	Total.Cholesterol	1.48737	FALSE	Pyruvate	.	.	.	1.48737	FALSE	Pyruvate	2.83782	FALSE	Phospholipids.in.Medium.LDL / Concentration.of.Medium.LDL.Particles	.	.	.	1.11524	Phospholipids to total lipids ratio in medium LDL	2.17158	Phospholipids.in.Medium.LDL / Concentration.of.Medium.LDL.Particles	1.48662	0
8:19820933:A:C	265	1192	LPL	r2 = 0.999 with rs328	FALSE	FALSE	FALSE	FALSE	FALSE	FALSE	FALSE	FALSE	.	not annotated	0.899133	rs145391587	8	19820933	C	A	0	rs145391587	69.2502	TRUE	logTG	372.378	TRUE	Total.Triglycerides	454.534	TRUE	Triglycerides.in.Small.VLDL	.	.	.	527.612	TRUE	Triglycerides to total lipids ratio in small HDL	629.301	TRUE	Triglycerides.in.Small.VLDL / Saturated.Fatty.Acids	.	.	.	387.924	Free cholesterol to total lipids ratio in medium LDL	500.338	Cholesterol.in.IDL / Remnant.Cholesterol..Non.HDL..Non.LDL..Cholesterol.	82.1563	73.0779
1:109821511:T:G	266	162	PSRC1,CELSR2-PSRC1,CELSR2	r2 = 0.923 with rs12740374	FALSE	FALSE	FALSE	FALSE	FALSE	FALSE	FALSE	FALSE	.	not annotated	0.217016	rs602633	1	109821511	G	T	0	rs602633	68.6275	TRUE	LDL	364.041	TRUE	Clinical.LDL.Cholesterol	464.991	TRUE	Phospholipids.in.Small.LDL	.	.	.	464.991	TRUE	Phospholipids.in.Small.LDL	518.398	TRUE	Phospholipids.in.Small.HDL / Total.Lipids.in.Large.LDL	.	.	.	289.87	Free cholesterol to total lipids ratio in small HDL	393.25	Free.Cholesterol.in.Small.HDL / Phospholipids.in.Small.HDL	100.949	0
4:74512280:G:A	267	649	.	duplicate model	FALSE	FALSE	FALSE	FALSE	FALSE	FALSE	FALSE	FALSE	.	not annotated	.	rs573930512	4	74512280	A	G	.	.	68.6267	TRUE	nonHDL	.	.	.	.	.	.	.	.	.	.	.	.	.	.	.	.	.	.	.	.	.	.	.	.
19:11242307:G:C	268	2300	.	duplicate model	FALSE	FALSE	FALSE	FALSE	FALSE	FALSE	FALSE	FALSE	.	not annotated	.	rs2738464	19	11242307	C	G	.	.	68.5686	TRUE	LDL	.	.	.	.	.	.	.	.	.	.	.	.	.	.	.	.	.	.	.	.	.	.	.	.
1:27021913:G:C	269	25	ARID1A,RP5-968P14.2-ARID1A,RP5-968P14.2	r2 = 1 with rs114165349	FALSE	FALSE	FALSE	FALSE	FALSE	FALSE	FALSE	FALSE	.	not annotated	0.976728	rs114165349	1	27021913	C	G	4	rs114165349+rs12740374+rs11591147+rs10889333+rs556107	68.057	TRUE	nonHDL	17.6868	TRUE	Total.Cholesterol.Minus.HDL.C	34.6037	TRUE	Concentration.of.Small.VLDL.Particles	.	.	.	37.5298	TRUE	Inverse Ratio of apolipoprotein B to apolipoprotein A1	55.1773	TRUE	Phospholipids.in.Medium.HDL / Triglycerides.in.Medium.LDL	.	.	.	12.4812	Inverse Ratio of apolipoprotein B to apolipoprotein A1	35.4299	Phospholipids.in.Medium.HDL / Saturated.Fatty.Acids	16.9169	2.92608
1:109818530:C:T	270	159	PSRC1,CELSR2-PSRC1,CELSR2	r2 = 0.994 with rs12740374	FALSE	FALSE	FALSE	FALSE	FALSE	FALSE	FALSE	FALSE	.	not annotated	0.222176	rs646776	1	109818530	T	C	0	rs646776	67.6392	TRUE	TC	288.478	TRUE	Total.Cholesterol	501.503	TRUE	Phospholipids.in.Small.LDL	.	.	.	501.503	TRUE	Phospholipids.in.Small.LDL	556.198	TRUE	Phospholipids.in.Small.HDL / Total.Lipids.in.Large.LDL	.	.	.	310.772	Free cholesterol to total lipids ratio in small HDL	421.163	Free.Cholesterol.in.Small.HDL / Phospholipids.in.Small.HDL	213.025	0
6:160501825:G:A	271	1001	IGF2R	r2 = 1 with rs78425119	FALSE	FALSE	FALSE	FALSE	FALSE	FALSE	FALSE	FALSE	.	not annotated	0.931221	rs78425119	6	160501825	A	G	2	rs78425119+rs10455872+rs6689	67.5243	TRUE	nonHDL	28.1767	TRUE	Total.Cholesterol.Minus.HDL.C	38.0189	TRUE	Concentration.of.Very.Small.VLDL.Particles	.	.	.	38.0189	TRUE	Concentration.of.Very.Small.VLDL.Particles	50.1944	TRUE	Citrate / Cholesteryl.Esters.in.VLDL	.	.	.	12.5051	Cholesteryl esters to total lipids ratio in medium HDL	26.7147	Concentration.of.HDL.Particles / Total.Concentration.of.Lipoprotein.Particles	9.84218	0
6:31270118:C:A	272	868	XXbac-BPG248L24.13-XXbac-BPG248L24.10,XXbac-BPG248L24.13	primary	TRUE	TRUE	TRUE	TRUE	TRUE	TRUE	TRUE	FALSE	.	.	0.590782	rs9468937	6	31270118	A	C	2	rs9468937+rs998584+rs9461755	67.2668	TRUE	logTG	22.2428	TRUE	Total.Triglycerides	29.6689	TRUE	Triglycerides.in.Very.Small.VLDL	1.59974	FALSE	0.95	29.6689	TRUE	Triglycerides.in.Very.Small.VLDL	32.5289	TRUE	Concentration.of.Small.LDL.Particles / Phospholipids.in.Small.VLDL	1.98227	FALSE	0.97	16.5233	Free cholesterol to total lipids ratio in large LDL	21.2904	Free.Cholesterol.in.Small.LDL / Phospholipids.in.Medium.LDL	7.42615	0
6:25314597:A:G	273	840	LRRC16A	r2 = 1 with rs181058325	FALSE	FALSE	FALSE	FALSE	FALSE	FALSE	FALSE	FALSE	.	not annotated	0.927505	rs181058325	6	25314597	G	A	22	rs181058325+rs10455872+rs6689+rs2235215+rs80215559+rs9402685+rs78425119+rs3800461+rs6457374+rs1338667+rs622871+rs9496567+rs2844795+rs148349043+rs62441842+rs35657082+rs4714035+rs1871859+rs3118362+rs6458949+rs11754612+rs9463799+rs35814089	67.0472	TRUE	TC	0.719339	FALSE	Total.Cholesterol	1.4997	FALSE	Free.Cholesterol.in.Very.Small.VLDL	.	.	.	1.84	FALSE	Phospholipids to total lipids ratio in very large VLDL	2.26208	FALSE	Triglycerides.in.Large.VLDL / Free.Cholesterol.in.Very.Large.VLDL	.	.	.	1.55328	Triglycerides to total lipids ratio in large VLDL	1.7456	Triglycerides.in.Large.VLDL / Free.Cholesterol.in.Very.Large.VLDL	0.78036	0.340302
6:135419688:T:C	274	978	HBS1L	r2 = 0.998 with rs7776054	FALSE	FALSE	FALSE	FALSE	FALSE	FALSE	FALSE	FALSE	.	not annotated	0.737344	rs9402685	6	135419688	C	T	4	rs9402685+rs10455872+rs6689+rs2235215+rs80215559	66.8761	TRUE	TC	7.60076	FALSE	Total.Cholesterol	23.7	TRUE	Lactate	.	.	.	23.7	TRUE	Lactate	75.011	TRUE	Pyruvate / Lactate	.	.	.	4.61167	Triglycerides to total lipids ratio in small VLDL	51.311	Pyruvate / Lactate	16.0992	0
6:160501825:G:A	275	1002	IGF2R	r2 = 1 with rs78425119	FALSE	FALSE	FALSE	FALSE	FALSE	FALSE	FALSE	FALSE	.	not annotated	0.931221	rs78425119	6	160501825	A	G	5	rs78425119+rs10455872+rs6689+rs2235215+rs80215559+rs9402685	66.8069	TRUE	TC	18.8453	TRUE	Total.Cholesterol	38.046	TRUE	Concentration.of.Very.Small.VLDL.Particles	.	.	.	38.046	TRUE	Concentration.of.Very.Small.VLDL.Particles	50.2452	TRUE	Citrate / Cholesteryl.Esters.in.VLDL	.	.	.	12.5283	Cholesteryl esters to total lipids ratio in medium HDL	26.7681	Concentration.of.HDL.Particles / Total.Concentration.of.Lipoprotein.Particles	19.2007	0
4:73491622:G:A	276	645	ADAMTS3-HNRNPA1P67	r2 = 1 with rs537526354	FALSE	FALSE	FALSE	FALSE	FALSE	FALSE	FALSE	FALSE	.	not annotated	0.999937	rs537526354	4	73491622	A	G	1	rs537526354+rs573930512	66.752	TRUE	TC	0.253418	FALSE	Total.Cholesterol	1.89619	FALSE	Lactate	.	.	.	1.89619	FALSE	Lactate	2.7752	FALSE	Creatinine / Lactate	.	.	.	1.26728	Phospholipids to total lipids ratio in very large VLDL	1.28151	Total.Lipids.in.Large.VLDL / Concentration.of.Large.VLDL.Particles	1.64277	0
6:16131156:T:C	277	827	MYLIP	primary	TRUE	TRUE	TRUE	TRUE	TRUE	TRUE	FALSE	TRUE	MYLIP	sterol-dependent inhibitor of cellular cholesterol uptake by mediating ubiquitination and subsequent degradation of LDLR	0.699224	rs2235215	6	16131156	C	T	3	rs2235215+rs10455872+rs6689+rs78425119	66.7352	TRUE	nonHDL	23.2444	TRUE	Total.Cholesterol.Minus.HDL.C	30.1429	TRUE	Cholesteryl.Esters.in.Medium.VLDL	4.26707	TRUE	0.48	30.1429	TRUE	Cholesteryl.Esters.in.Medium.VLDL	34.4266	TRUE	Concentration.of.Small.HDL.Particles / Phospholipids.in.Large.LDL	5.12581	TRUE	0.52	10.1647	Free cholesterol to total lipids ratio in large HDL	22.4533	Concentration.of.HDL.Particles / Total.Concentration.of.Lipoprotein.Particles	6.8986	0
6:161659369:C:G	278	1022	AGPAT4	r2 = 1 with rs148349043	FALSE	FALSE	FALSE	FALSE	FALSE	FALSE	FALSE	FALSE	.	not annotated	0.991254	rs148349043	6	161659369	G	C	6	rs148349043+rs10455872+rs2235215+rs1800562+rs6689+rs2297359+rs9399137	66.5129	TRUE	LDL	0.367556	FALSE	Clinical.LDL.Cholesterol	13.1375	TRUE	Triglycerides.in.Chylomicrons.and.Extremely.Large.VLDL	.	.	.	14.7652	TRUE	Free cholesterol to total lipids ratio in chylomicrons and extremely large VLDL	22.9992	TRUE	Triglycerides.in.Small.LDL / Triglycerides.in.Very.Small.VLDL	.	.	.	5.88313	Phospholipids to total lipids ratio in small LDL	16.2624	Triglycerides.in.Small.LDL / Triglycerides.in.Very.Small.VLDL	12.7699	1.62775
11:116571100:G:A	279	1578	AP000770.1-BUD13	MAF<1%	FALSE	FALSE	FALSE	FALSE	FALSE	FALSE	FALSE	FALSE	.	not annotated	0.999985	rs541102880	11	116571100	A	G	0	rs541102880	66.1547	TRUE	HDL	2.16323	FALSE	HDL.Cholesterol	2.3902	FALSE	Cholesteryl.Esters.in.HDL	.	.	.	2.91435	FALSE	Phospholipids to total lipids ratio in large VLDL	4.47469	FALSE	Triglycerides.in.Medium.LDL / Leucine	.	.	.	1.99469	Cholesterol to total lipids ratio in large LDL	2.72504	Cholesterol.in.Large.LDL / Total.Lipids.in.LDL	0.226975	0.524147
1:109815252:A:G	280	145	CELSR2	primary	TRUE	TRUE	TRUE	TRUE	TRUE	TRUE	FALSE	FALSE	SORT1 (2)	secondary association with LPmtr gene	0.684293	rs611917	1	109815252	G	A	0	rs611917	66.1099	TRUE	nonHDL	191.456	TRUE	Total.Cholesterol.Minus.HDL.C	278.66	TRUE	Phospholipids.in.Small.LDL	51.3224	TRUE	1	278.66	TRUE	Phospholipids.in.Small.LDL	313.579	TRUE	Phospholipids.in.Small.HDL / Total.Lipids.in.Large.LDL	53.7748	TRUE	1	184.479	Free cholesterol to total lipids ratio in small HDL	246.94	Free.Cholesterol.in.Small.HDL / Phospholipids.in.Small.HDL	87.2045	0
16:72079657:C:T	281	2028	TXNL4B	primary	TRUE	TRUE	TRUE	TRUE	TRUE	TRUE	TRUE	FALSE	HPR (2)	secondary association with LPmtr gene	0.80735	rs77303550	16	72079657	T	C	0	rs77303550	66.0421	TRUE	TC	34.5174	TRUE	Total.Cholesterol	403.156	TRUE	Glycoprotein.Acetyls	47.6314	TRUE	1	403.156	TRUE	Glycoprotein.Acetyls	567.556	TRUE	Glycoprotein.Acetyls / Omega.6.Fatty.Acids	62.7486	TRUE	1	23.1616	Phospholipids to total lipids ratio in very large VLDL	165.008	Sphingomyelins / Total.Esterified.Cholesterol	368.639	0
8:19823648:A:T	282	1194	LPL	r2 = 0.996 with rs15285	FALSE	FALSE	FALSE	FALSE	FALSE	FALSE	FALSE	FALSE	.	not annotated	0.715015	rs3208305	8	19823648	T	A	0	rs3208305	65.4721	TRUE	HDL	296.223	TRUE	HDL.Cholesterol	346.605	TRUE	Triglycerides.in.Small.VLDL	.	.	.	453.713	TRUE	Triglycerides to total lipids ratio in small HDL	512.697	TRUE	Triglycerides.in.Small.VLDL / Saturated.Fatty.Acids	.	.	.	298.777	Free cholesterol to total lipids ratio in large LDL	418.208	Cholesterol.in.IDL / Remnant.Cholesterol..Non.HDL..Non.LDL..Cholesterol.	50.3824	107.108
1:220970028:A:G	283	219	MARC1	r2 = 1 with rs2642438	FALSE	FALSE	FALSE	FALSE	FALSE	FALSE	FALSE	FALSE	.	not annotated	0.296812	rs2642438	1	220970028	G	A	4	rs2642438+rs10127775+rs3768321+rs646776+rs75460349	65.4425	TRUE	HDL	23.1889	TRUE	HDL.Cholesterol	38.3554	TRUE	Cholesterol.in.IDL	.	.	.	48.0946	TRUE	Ratio of saturated fatty acids to total fatty acids	55.4897	TRUE	Saturated.Fatty.Acids / Monounsaturated.Fatty.Acids	.	.	.	36.122	Ratio of saturated fatty acids to total fatty acids	46.3812	Concentration.of.Small.VLDL.Particles / Concentration.of.VLDL.Particles	15.1665	9.73916
19:45412079:C:T	284	2394	.	duplicate model	FALSE	FALSE	FALSE	FALSE	FALSE	FALSE	FALSE	FALSE	.	not annotated	.	rs7412	19	45412079	T	C	.	.	65.0362	TRUE	HDL	.	.	.	.	.	.	.	.	.	.	.	.	.	.	.	.	.	.	.	.	.	.	.	.
1:56840574:A:C	285	84	RP11-504A18.1-AC119674.1,AC119674.1	MAF<1%	FALSE	FALSE	FALSE	FALSE	FALSE	FALSE	FALSE	FALSE	.	not annotated	0.999935	rs186538116	1	56840574	C	A	5	rs186538116+rs12740374+rs11591147+rs553427+rs598253+rs557402933	64.7747	TRUE	LDL	0.193587	FALSE	Clinical.LDL.Cholesterol	0.980669	FALSE	Glucose	.	.	.	0.980669	FALSE	Glucose	1.25986	FALSE	Triglycerides.in.Chylomicrons.and.Extremely.Large.VLDL / Phospholipids.in.Chylomicrons.and.Extremely.Large.VLDL	.	.	.	0.594633	Cholesterol to total lipids ratio in small LDL	0.769919	Omega.6.Fatty.Acids / Total.Esterified.Cholesterol	0.787082	0
6:31106459:C:A	286	865	POLR2LP,CCHCR1,PSORS1C1,PSORS1C2	r2 = 1 with rs1265097	FALSE	FALSE	FALSE	FALSE	FALSE	FALSE	FALSE	FALSE	.	not annotated	0.920941	rs1265097	6	31106459	A	C	9	rs1265097+rs10455872+rs2235215+rs1800562+rs6689+rs2297359+rs9399137+rs148349043+rs9496567+rs35657082	64.5884	TRUE	LDL	4.3982	FALSE	Clinical.LDL.Cholesterol	7.03515	FALSE	Cholesteryl.Esters.in.Small.VLDL	.	.	.	7.03515	FALSE	Cholesteryl.Esters.in.Small.VLDL	7.33574	FALSE	Concentration.of.Small.LDL.Particles / Cholesteryl.Esters.in.VLDL	.	.	.	4.0462	Triglycerides to total lipids ratio in large VLDL	4.0462	Triglycerides.in.Large.VLDL / Total.Lipids.in.Large.VLDL	2.63695	0
2:21385778:C:G	287	294	TDRD15-RP11-79J24.1	r2 = 0.969 with rs138905573	FALSE	FALSE	FALSE	FALSE	FALSE	FALSE	FALSE	FALSE	.	not annotated	0.199786	rs1712248	2	21385778	G	C	0	rs1712248	64.5407	TRUE	LDL	210.494	TRUE	Clinical.LDL.Cholesterol	272.21	TRUE	Phospholipids.in.IDL	.	.	.	272.21	TRUE	Phospholipids.in.IDL	296.11	TRUE	Phospholipids.in.IDL / Albumin	.	.	.	177.908	Free cholesterol to total lipids ratio in small HDL	182.286	Free.Cholesterol.in.Small.HDL / Phospholipids.in.Small.HDL	61.7157	0
2:203495058:G:A	288	471	AC009960.3-FAM117B,FAM117B	primary	TRUE	TRUE	TRUE	TRUE	TRUE	TRUE	FALSE	FALSE	.	.	0.704783	rs113867238	2	203495058	A	G	4	rs113867238+rs934197+rs4299376+rs1260326+rs907866	64.4559	TRUE	TC	15.3213	TRUE	Total.Cholesterol	21.0579	TRUE	Phospholipids.in.Small.LDL	5.55565	TRUE	0.16	21.0579	TRUE	Phospholipids.in.Small.LDL	26.1362	TRUE	Triglycerides.in.Small.HDL / Triglycerides.in.Small.LDL	3.00957	FALSE	0.47	5.87068	Cholesteryl esters to total lipids ratio in very large HDL	20.1253	Triglycerides.in.Small.HDL / Triglycerides.in.Small.LDL	5.73663	0
2:20371380:G:A	289	264	RN7SL140P,AC098828.3-RN7SL140P,RNU6-961P	r2 = 1 with rs907866	FALSE	FALSE	FALSE	FALSE	FALSE	FALSE	FALSE	FALSE	.	not annotated	0.554936	rs907866	2	20371380	A	G	3	rs907866+rs934197+rs4299376+rs1260326	64.3179	TRUE	TC	26.5713	TRUE	Total.Cholesterol	49.0308	TRUE	Phosphatidylcholines	.	.	.	49.0308	TRUE	Phosphatidylcholines	55.8839	TRUE	Apolipoprotein.B / Remnant.Cholesterol..Non.HDL..Non.LDL..Cholesterol.	.	.	.	14.8228	Cholesteryl esters to total lipids ratio in small LDL	37.4244	Phospholipids.in.LDL / Total.Cholesterol.Minus.HDL.C	22.4595	0
5:74639544:CTTGTA:C	290	747	HMGCR	r2 = 0.864 with rs12916	FALSE	FALSE	FALSE	FALSE	FALSE	FALSE	FALSE	FALSE	.	not annotated	0.637457	rs10590407	5	74639544	C	CTTGTA	0	rs10590407	64.2856	TRUE	TC	117.706	TRUE	Total.Cholesterol	157.02	TRUE	Cholesteryl.Esters.in.Medium.VLDL	.	.	.	157.02	TRUE	Cholesteryl.Esters.in.Medium.VLDL	197.383	TRUE	Free.Cholesterol.in.Small.HDL / Total.Cholesterol	.	.	.	80.3817	Phospholipids to total lipids ratio in large HDL	141.592	Triglycerides.in.Small.HDL / Phospholipids.in.VLDL	39.3143	0
1:27021913:G:C	291	23	ARID1A,RP5-968P14.2-ARID1A,RP5-968P14.2	r2 = 1 with rs114165349	FALSE	FALSE	FALSE	FALSE	FALSE	FALSE	FALSE	FALSE	.	not annotated	0.976728	rs114165349	1	27021913	C	G	7	rs114165349+rs12740374+rs11591147+rs553427+rs598253+rs557402933+rs186538116+rs10903129	64.2403	TRUE	LDL	12.0897	TRUE	Clinical.LDL.Cholesterol	34.4125	TRUE	Concentration.of.Small.VLDL.Particles	.	.	.	37.2576	TRUE	Inverse Ratio of apolipoprotein B to apolipoprotein A1	54.992	TRUE	Phospholipids.in.Medium.HDL / Triglycerides.in.Medium.LDL	.	.	.	12.5134	Inverse Ratio of apolipoprotein B to apolipoprotein A1	35.2435	Phospholipids.in.Medium.HDL / Saturated.Fatty.Acids	22.3228	2.84513
1:182150978:C:A	292	194	GS1-122H1.3,GS1-122H1.2	primary	TRUE	TRUE	TRUE	TRUE	TRUE	TRUE	TRUE	FALSE	.	.	0.666458	rs1689797	1	182150978	A	C	6	rs1689797+rs10127775+rs3768321+rs646776+rs75460349+rs2642438+rs4847419	64.091	TRUE	HDL	21.2284	TRUE	HDL.Cholesterol	31.5869	TRUE	Cholesteryl.Esters.in.Large.HDL	3.23569	FALSE	0.92	35.2414	TRUE	Free cholesterol to total lipids ratio in very large HDL	43.4875	TRUE	Concentration.of.Large.HDL.Particles / Cholesteryl.Esters.in.Very.Small.VLDL	5.27938	TRUE	0.99	19.6595	Triglycerides to total lipids ratio in large VLDL	25.5583	Phospholipids.in.Large.LDL / Total.Esterified.Cholesterol	10.3585	3.65457
10:94839642:G:A	293	1433	CYP26A1,CYP26A1-NIP7P1	r2 = 0.997 with rs4418728	FALSE	FALSE	FALSE	FALSE	FALSE	FALSE	FALSE	FALSE	.	not annotated	0.5525	rs2068888	10	94839642	A	G	0	rs2068888	64.0837	TRUE	logTG	22.4943	TRUE	Total.Triglycerides	30.0517	TRUE	Concentration.of.Small.VLDL.Particles	.	.	.	30.0517	TRUE	Concentration.of.Small.VLDL.Particles	47.4801	TRUE	Total.Lipids.in.Small.VLDL / Citrate	.	.	.	14.7375	Cholesterol to total lipids ratio in medium HDL	28.434	Phosphoglycerides / Free.Cholesterol.in.HDL	7.55747	0
2:27730940:T:C	294	345	.	duplicate model	FALSE	FALSE	FALSE	FALSE	FALSE	FALSE	FALSE	FALSE	.	not annotated	.	rs1260326	2	27730940	C	T	.	.	63.9285	TRUE	logTG	.	.	.	.	.	.	.	.	.	.	.	.	.	.	.	.	.	.	.	.	.	.	.	.
12:123804721:G:C	295	1770	SBNO1	primary	TRUE	TRUE	TRUE	TRUE	TRUE	TRUE	FALSE	FALSE	.	.	0.90745	rs12366872	12	123804721	C	G	3	rs12366872+rs61941677+rs7133378+rs2338104	63.8069	TRUE	HDL	11.9815	TRUE	HDL.Cholesterol	14.2242	TRUE	Apolipoprotein.A1	4.58227	TRUE	0.25	14.2242	TRUE	Apolipoprotein.A1	21.4882	TRUE	Triglycerides.in.Large.HDL / Triglycerides.in.IDL	5.56542	TRUE	0.51	2.51012	Free cholesterol to total lipids ratio in very large HDL	13.4799	Triglycerides.in.Small.HDL / Triglycerides.in.HDL	2.24268	0
11:126238633:T:C	296	1637	ST3GAL4	r2 = 0.966 with rs78689694	FALSE	FALSE	FALSE	FALSE	FALSE	FALSE	FALSE	FALSE	.	not annotated	0.867209	rs74612335	11	126238633	C	T	2	rs74612335+rs964184+rs174564	63.556	TRUE	TC	17.2517	TRUE	Total.Cholesterol	35.8413	TRUE	Free.Cholesterol.in.Small.LDL	.	.	.	35.8413	TRUE	Free.Cholesterol.in.Small.LDL	47.5552	TRUE	Total.Free.Cholesterol / Clinical.LDL.Cholesterol	.	.	.	22.7934	Phospholipids to total lipids ratio in small HDL	29.3066	Apolipoprotein.A1 / Total.Concentration.of.Lipoprotein.Particles	18.5897	0
4:3443931:A:G	297	606	RGS12,HGFAC	primary	TRUE	TRUE	TRUE	TRUE	TRUE	TRUE	TRUE	FALSE	.	.	0.37969	rs13108218	4	3443931	G	A	3	rs13108218+rs573930512+rs537526354+rs4860987	63.4461	TRUE	TC	20.5951	TRUE	Total.Cholesterol	39.866	TRUE	Omega.6.Fatty.Acids	2.99266	FALSE	0.91	39.866	TRUE	Omega.6.Fatty.Acids	51.9275	TRUE	Free.Cholesterol.in.Very.Small.VLDL / Phospholipids.in.Small.VLDL	4.00049	FALSE	1	13.4426	Triglycerides to total lipids ratio in very large HDL	27.6095	Total.Lipids.in.Very.Large.HDL / Concentration.of.Very.Large.HDL.Particles	19.271	0
1:109817838:T:C	298	158	.	duplicate model	FALSE	FALSE	FALSE	FALSE	FALSE	FALSE	FALSE	FALSE	.	not annotated	.	rs660240	1	109817838	C	T	.	.	63.4299	TRUE	TC	.	.	.	.	.	.	.	.	.	.	.	.	.	.	.	.	.	.	.	.	.	.	.	.
20:34160840:G:A	299	2489	FER1L4	primary	TRUE	TRUE	TRUE	TRUE	TRUE	FALSE	FALSE	FALSE	.	.	0.862944	rs7261820	20	34160840	A	G	4	rs7261820+rs1883711+rs1800961+rs6029549+rs2618566	63.4283	TRUE	TC	16.5478	TRUE	Total.Cholesterol	18.6441	TRUE	Total.Free.Cholesterol	0.894548	FALSE	0.24	18.6441	TRUE	Total.Free.Cholesterol	22.6481	TRUE	Albumin / Polyunsaturated.Fatty.Acids	2.43262	FALSE	0.4	3.01963	Free cholesterol to total lipids ratio in large HDL	6.04365	Cholesteryl.Esters.in.Medium.HDL / Cholesterol.in.Medium.HDL	2.09632	0
7:6461310:C:T	300	1037	DAGLB	r2 = 1 with rs79949326	FALSE	FALSE	FALSE	FALSE	FALSE	FALSE	FALSE	FALSE	.	not annotated	0.740613	rs79949326	7	6461310	T	C	2	rs79949326+rs55747707+rs11762784	63.3556	TRUE	HDL	7.4912	FALSE	HDL.Cholesterol	7.67908	FALSE	Total.Esterified.Cholesterol	.	.	.	18.4344	TRUE	Cholesterol to total lipids ratio in large LDL	23.2334	TRUE	Phospholipids.in.LDL / LDL.Cholesterol	.	.	.	16.2331	Phospholipids to total lipids ratio in very small VLDL	18.3724	Phospholipids.in.LDL / LDL.Cholesterol	0.187879	10.7553
2:21385778:C:G	301	296	.	duplicate model	FALSE	FALSE	FALSE	FALSE	FALSE	FALSE	FALSE	FALSE	.	not annotated	.	rs1712248	2	21385778	G	C	.	.	62.9553	TRUE	TC	.	.	.	.	.	.	.	.	.	.	.	.	.	.	.	.	.	.	.	.	.	.	.	.
9:107661742:A:C	302	1340	.	duplicate model	FALSE	FALSE	FALSE	FALSE	FALSE	FALSE	FALSE	FALSE	.	not annotated	.	rs2740488	9	107661742	C	A	.	.	62.9514	TRUE	TC	.	.	.	.	.	.	.	.	.	.	.	.	.	.	.	.	.	.	.	.	.	.	.	.
1:63070537:AGTTAATGTG:A	303	108	DOCK7,ANGPTL3,AL138847.1	r2 = 0.984 with rs598253	FALSE	FALSE	FALSE	FALSE	FALSE	FALSE	FALSE	FALSE	.	not annotated	0.645301	rs34483103	1	63070537	A	AGTTAATGTG	0	rs34483103	62.8525	TRUE	logTG	172.812	TRUE	Total.Triglycerides	273.974	TRUE	Polyunsaturated.Fatty.Acids	.	.	.	273.974	TRUE	Polyunsaturated.Fatty.Acids	322.324	TRUE	Albumin / Polyunsaturated.Fatty.Acids	.	.	.	160.532	Cholesteryl esters to total lipids ratio in small LDL	236.913	Free.Cholesterol.in.Small.LDL / LDL.Cholesterol	101.162	0
7:130433384:C:T	304	1126	KLF14-RP11-36B6.1	r2 = 0.996 with rs11762784	FALSE	FALSE	FALSE	FALSE	FALSE	FALSE	FALSE	FALSE	.	not annotated	0.50612	rs4731702	7	130433384	T	C	2	rs4731702+rs3812316+rs35753501	62.6038	TRUE	logTG	29.1337	TRUE	Total.Triglycerides	31.4905	TRUE	Free.Cholesterol.in.Large.VLDL	.	.	.	33.3491	TRUE	Inverse Ratio of triglycerides to phosphoglycerides	54.1595	TRUE	Triglycerides.in.Small.LDL / Monounsaturated.Fatty.Acids	.	.	.	15.9761	Triglycerides to total lipids ratio in very large HDL	37.503	Free.Cholesterol.in.Small.HDL / Total.Concentration.of.Lipoprotein.Particles	2.35684	1.8586
12:124492610:T:G	305	1776	FAM101A,RP11-214K3.5,ZNF664	r2 = 0.902 with rs7133378	FALSE	FALSE	FALSE	FALSE	FALSE	FALSE	FALSE	FALSE	.	not annotated	0.663409	rs12303671	12	124492610	G	T	1	rs12303671+rs76895963	62.224	TRUE	logTG	17.9657	TRUE	Total.Triglycerides	33.8779	TRUE	Cholesteryl.Esters.in.Large.HDL	.	.	.	33.8779	TRUE	Cholesteryl.Esters.in.Large.HDL	41.8177	TRUE	Free.Cholesterol.in.Small.HDL / Concentration.of.HDL.Particles	.	.	.	12.8334	Free cholesterol to total lipids ratio in large LDL	29.8644	Free.Cholesterol.in.Small.HDL / Total.Concentration.of.Lipoprotein.Particles	15.9122	0
1:93845655:T:A	306	137	RP4-713B5.2,DR1-RP4-713B5.2	r2 = 0.886 with rs12133907	FALSE	FALSE	FALSE	FALSE	FALSE	FALSE	FALSE	FALSE	.	not annotated	0.369673	rs4847419	1	93845655	A	T	5	rs4847419+rs10127775+rs3768321+rs646776+rs75460349+rs2642438	62.0814	TRUE	HDL	7.75269	FALSE	HDL.Cholesterol	9.34887	FALSE	Glutamine	.	.	.	16.984	TRUE	Phospholipids to total lipids ratio in medium HDL	19.6834	TRUE	Total.Lipids.in.HDL / Phospholipids.in.HDL	.	.	.	14.9024	Phospholipids to total lipids ratio in medium HDL	15.7252	Total.Lipids.in.HDL / Phospholipids.in.HDL	1.59618	7.63508
7:73037366:G:A	307	1096	MLXIPL	primary	TRUE	TRUE	TRUE	TRUE	TRUE	TRUE	FALSE	FALSE	MLXIPL (2)	secondary association with LPmtr gene	0.796958	rs55747707	7	73037366	A	G	0	rs55747707	61.8196	TRUE	HDL	21.7822	TRUE	HDL.Cholesterol	230.737	TRUE	Triglycerides.in.Small.VLDL	27.7138	TRUE	1	274.979	TRUE	Triglycerides to total lipids ratio in very small VLDL	315.8	TRUE	Cholesterol.in.Very.Small.VLDL / Triglycerides.in.Small.VLDL	39.1749	TRUE	1	238.246	Cholesterol to total lipids ratio in very small VLDL	258.315	Cholesteryl.Esters.in.Large.LDL / Cholesterol.in.Large.LDL	208.955	44.2418
16:67744292:C:CTTTG	308	2001	GFOD2	r2 = 0.816 with rs56374641	FALSE	FALSE	FALSE	FALSE	FALSE	FALSE	FALSE	FALSE	.	not annotated	0.901981	rs143133208	16	67744292	CTTTG	C	1	rs143133208+rs183130	61.8153	TRUE	HDL	15.0281	TRUE	HDL.Cholesterol	17.5024	TRUE	Cholesteryl.Esters.in.HDL	.	.	.	30.4463	TRUE	Cholesteryl esters to total lipids ratio in large HDL	35.6287	TRUE	Free.Cholesterol.in.Large.HDL / Concentration.of.Large.HDL.Particles	.	.	.	21.9353	Phospholipids to total lipids ratio in medium HDL	32.8756	Total.Lipids.in.IDL / Total.Esterified.Cholesterol	2.4743	12.9439
2:169827796:G:A	309	462	ABCB11	r2 = 0.994 with rs66491446	FALSE	FALSE	FALSE	FALSE	FALSE	FALSE	FALSE	FALSE	.	not annotated	0.394341	rs10184673	2	169827796	A	G	5	rs10184673+rs934197+rs4299376+rs1260326+rs907866+rs113867238	61.8069	TRUE	TC	16.8391	TRUE	Total.Cholesterol	21.1374	TRUE	Phospholipids.in.IDL	.	.	.	21.1374	TRUE	Phospholipids.in.IDL	25.2834	TRUE	Phospholipids.in.IDL / Albumin	.	.	.	11.4015	Free cholesterol to total lipids ratio in small HDL	11.4015	Free.Cholesterol.in.Small.HDL / Total.Lipids.in.Small.HDL	4.29831	0
9:107661742:A:C	310	1343	ABCA1	r2 = 1 with rs2740488	FALSE	FALSE	FALSE	FALSE	FALSE	FALSE	FALSE	FALSE	.	not annotated	0.73678	rs2740488	9	107661742	C	A	1	rs2740488+rs507666	60.3737	TRUE	nonHDL	24.4659	TRUE	Total.Cholesterol.Minus.HDL.C	109.305	TRUE	Triglycerides.in.Large.HDL	.	.	.	109.305	TRUE	Triglycerides.in.Large.HDL	193.863	TRUE	Triglycerides.in.Very.Large.HDL / Triglycerides.in.Very.Small.VLDL	.	.	.	54.6235	Free cholesterol to total lipids ratio in small HDL	98.7347	Triglycerides.in.Very.Large.HDL / Triglycerides.in.Very.Small.VLDL	84.8393	0
1:220970028:A:G	311	220	MARC1	r2 = 1 with rs2642438	FALSE	FALSE	FALSE	FALSE	FALSE	FALSE	FALSE	FALSE	.	not annotated	0.296812	rs2642438	1	220970028	G	A	8	rs2642438+rs12740374+rs11591147+rs553427+rs598253+rs557402933+rs186538116+rs10903129+rs114165349	60.2457	TRUE	LDL	15.7182	TRUE	Clinical.LDL.Cholesterol	38.0387	TRUE	Cholesterol.in.IDL	.	.	.	48.1576	TRUE	Ratio of saturated fatty acids to total fatty acids	56.321	TRUE	Saturated.Fatty.Acids / Monounsaturated.Fatty.Acids	.	.	.	36.576	Ratio of saturated fatty acids to total fatty acids	46.8606	Concentration.of.Small.VLDL.Particles / Concentration.of.VLDL.Particles	22.3205	10.1189
16:81534790:T:C	312	2055	CMIP	r2 = 1 with rs2925979	FALSE	FALSE	FALSE	FALSE	FALSE	FALSE	FALSE	FALSE	.	not annotated	0.301428	rs2925979	16	81534790	C	T	1	rs2925979+rs17231506	59.9172	TRUE	logTG	21.4592	TRUE	Total.Triglycerides	36.6291	TRUE	Cholesteryl.Esters.in.Large.HDL	.	.	.	38.9044	TRUE	Triglycerides to total lipids ratio in small HDL	49.9858	TRUE	Triglycerides.in.Small.VLDL / Monounsaturated.Fatty.Acids	.	.	.	22.39	Free cholesterol to total lipids ratio in large LDL	32.2359	Free.Cholesterol.in.Small.HDL / Total.Concentration.of.Lipoprotein.Particles	15.1699	2.27534
6:34616322:G:C	313	901	C6orf106	r2 = 1 with rs3800461	FALSE	FALSE	FALSE	FALSE	FALSE	FALSE	FALSE	FALSE	.	not annotated	0.884352	rs3800461	6	34616322	C	G	6	rs3800461+rs10455872+rs6689+rs2235215+rs80215559+rs9402685+rs78425119	59.5622	TRUE	TC	16.894	TRUE	Total.Cholesterol	19.7342	TRUE	Sphingomyelins	.	.	.	19.7342	TRUE	Sphingomyelins	24.6883	TRUE	Tyrosine / Phosphatidylcholines	.	.	.	4.27906	Free cholesterol to total lipids ratio in medium HDL	9.88384	Tyrosine / Saturated.Fatty.Acids	2.84023	0
15:45001900:A:G	314	1898	B2M,PATL2	primary	TRUE	TRUE	FALSE	FALSE	FALSE	FALSE	FALSE	FALSE	.	not annotated	0.876743	rs1901529	15	45001900	G	A	10	rs1901529+rs139974673+rs1077835+rs11635675+rs72749502+rs139661283+rs112147665+rs2218181+rs1037117+rs34245505+rs72735627	59.3904	TRUE	logTG	0.376276	FALSE	Total.Triglycerides	1.04075	FALSE	Triglycerides.in.Large.HDL	.	.	.	1.04075	FALSE	Triglycerides.in.Large.HDL	1.9641	FALSE	Free.Cholesterol.in.Small.LDL / Free.Cholesterol.in.LDL	.	.	.	0.60911	Phospholipids to total lipids ratio in small LDL	1.84923	Free.Cholesterol.in.Small.LDL / Free.Cholesterol.in.LDL	0.664472	0
1:25764177:A:G	315	16	TMEM57	r2 = 0.991 with rs35148262	FALSE	FALSE	FALSE	FALSE	FALSE	FALSE	FALSE	FALSE	.	not annotated	0.44037	rs9438905	1	25764177	G	A	6	rs9438905+rs12740374+rs11591147+rs10889333+rs556107+rs114165349+rs557402933	58.9208	TRUE	nonHDL	22.8552	TRUE	Total.Cholesterol.Minus.HDL.C	29.0977	TRUE	Cholesteryl.Esters.in.Medium.VLDL	.	.	.	29.0977	TRUE	Cholesteryl.Esters.in.Medium.VLDL	37.9881	TRUE	Total.Lipids.in.Small.HDL / Total.Cholesterol	.	.	.	20.5237	Free cholesterol to total lipids ratio in small HDL	26.5175	Triglycerides.in.Small.HDL / Phospholipids.in.VLDL	6.24246	0
2:118845121:G:A	316	429	INSIG2,RN7SL111P-INSIG2	r2 = 1 with rs55938402	FALSE	FALSE	FALSE	FALSE	FALSE	FALSE	FALSE	FALSE	.	not annotated	0.9005	rs150474434	2	118845121	A	G	3	rs150474434+rs934197+rs4299376+rs1260326	58.8697	TRUE	LDL	12.3956	TRUE	Clinical.LDL.Cholesterol	17.3594	TRUE	Cholesteryl.Esters.in.Very.Small.VLDL	.	.	.	17.3594	TRUE	Cholesteryl.Esters.in.Very.Small.VLDL	18.6796	TRUE	Phospholipids.in.IDL / Albumin	.	.	.	5.35421	Free cholesterol to total lipids ratio in large HDL	6.74703	Triglycerides.in.Small.VLDL / Phospholipids.in.VLDL	4.96379	0
22:21949411:A:C	317	2574	UBE2L3	r2 = 0.978 with rs5998509	FALSE	FALSE	FALSE	FALSE	FALSE	FALSE	FALSE	FALSE	.	not annotated	0.806976	rs2070512	22	21949411	C	A	0	rs2070512	58.7546	TRUE	HDL	17.6594	TRUE	HDL.Cholesterol	25.8738	TRUE	Phospholipids.in.Medium.HDL	.	.	.	25.8738	TRUE	Phospholipids.in.Medium.HDL	26.4714	TRUE	Phospholipids.in.Medium.HDL / Average.Diameter.for.HDL.Particles	.	.	.	11.8193	Cholesteryl esters to total lipids ratio in large LDL	16.1293	Total.Lipids.in.LDL / Cholesteryl.Esters.in.LDL	8.21438	0
8:116658583:G:T	318	1251	TRPS1	r2 = 0.992 with rs2721961	FALSE	FALSE	FALSE	FALSE	FALSE	FALSE	FALSE	FALSE	.	not annotated	0.718823	rs2737245	8	116658583	T	G	3	rs2737245+rs28601761+rs9987289+rs9297994	58.6635	TRUE	LDL	17.5075	TRUE	Clinical.LDL.Cholesterol	28.7717	TRUE	Free.Cholesterol.in.Very.Small.VLDL	.	.	.	28.7717	TRUE	Free.Cholesterol.in.Very.Small.VLDL	34.6667	TRUE	Albumin / Polyunsaturated.Fatty.Acids	.	.	.	5.88658	Free cholesterol to total lipids ratio in large HDL	12.5572	Albumin / Polyunsaturated.Fatty.Acids	11.2642	0
6:161008646:G:A	319	1010	LPA	primary	TRUE	TRUE	TRUE	TRUE	TRUE	TRUE	TRUE	FALSE	LPA (2)	secondary association with LPmtr gene	0.892662	rs41272086	6	161008646	A	G	5	rs41272086+rs998584+rs9461755+rs9468937+rs672457+rs622871	58.3883	TRUE	logTG	30.526	TRUE	Total.Triglycerides	51.0825	TRUE	Triglycerides.in.Small.HDL	6.7526	TRUE	1	65.0565	TRUE	Cholesterol to total lipids ratio in large HDL	72.0038	TRUE	Triglycerides.in.Small.HDL / Total.Lipids.in.Lipoprotein.Particles	11.8206	TRUE	1	43.3407	Cholesterol to total lipids ratio in very small VLDL	57.6897	Free.Cholesterol.in.Small.VLDL / Cholesterol.in.Small.VLDL	20.5566	13.974
17:66879927:C:T	320	2173	ABCA8	primary	TRUE	TRUE	TRUE	TRUE	TRUE	TRUE	TRUE	TRUE	ABCA8	involved in cholesterol transport, interaction with ABCA1 and APOA1	0.938167	rs34931250	17	66879927	T	C	3	rs34931250+rs72836561+rs2376583+rs881844	58.383	TRUE	HDL	15.3713	TRUE	HDL.Cholesterol	24.7358	TRUE	Phospholipids.in.Very.Small.VLDL	1.86462	FALSE	0.58	25.0277	TRUE	Phospholipids to total lipids ratio in very large VLDL	43.9171	TRUE	Phospholipids.in.IDL / Total.Esterified.Cholesterol	2.44972	FALSE	0.97	18.0067	Phospholipids to total lipids ratio in very large VLDL	33.7241	Phospholipids.in.IDL / Total.Esterified.Cholesterol	9.36443	0.291905
12:57826982:A:G	321	1701	RP11-756H6.1,INHBC,R3HDM2	r2 = 0.982 with rs12313762	FALSE	FALSE	FALSE	FALSE	FALSE	FALSE	FALSE	FALSE	.	not annotated	0.754915	rs73119306	12	57826982	G	A	4	rs73119306+rs61941677+rs7133378+rs2338104+rs12366872	58.3335	TRUE	HDL	14.9171	TRUE	HDL.Cholesterol	27.2411	TRUE	Cholesteryl.Esters.in.Small.VLDL	.	.	.	27.2411	TRUE	Cholesteryl.Esters.in.Small.VLDL	34.153	TRUE	Cholesteryl.Esters.in.Small.VLDL / Tyrosine	.	.	.	11.4961	Triglycerides to total lipids ratio in medium HDL	23.9928	Total.Esterified.Cholesterol / Total.Cholesterol	12.324	0
16:15150505:C:A	322	1965	RRN3,PDXDC1,NTAN1	r2 = 1 with rs12928099	FALSE	FALSE	FALSE	FALSE	FALSE	FALSE	FALSE	FALSE	.	not annotated	0.705198	rs12928099	16	15150505	A	C	2	rs12928099+rs17231506+rs2925979	58.3335	TRUE	logTG	8.95844	TRUE	Total.Triglycerides	192.086	TRUE	Degree.of.Unsaturation	.	.	.	192.086	TRUE	Degree.of.Unsaturation	230.466	TRUE	Monounsaturated.Fatty.Acids / Omega.3.Fatty.Acids	.	.	.	95.5393	Ratio of monounsaturated fatty acids to total fatty acids	150.473	Linoleic.Acid / Polyunsaturated.Fatty.Acids	183.128	0
11:64004723:G:C	323	1547	FKBP2,RP11-783K16.14,DNAJC4,VEGFB	r2 = 1 with rs56271783	FALSE	FALSE	FALSE	FALSE	FALSE	FALSE	FALSE	FALSE	.	not annotated	0.954446	rs56271783	11	64004723	C	G	3	rs56271783+rs964184+rs192489212+rs174562	58.2807	TRUE	logTG	19.7258	TRUE	Total.Triglycerides	22.3711	TRUE	Phospholipids.in.Large.VLDL	.	.	.	24.9003	TRUE	Inverse Ratio of triglycerides to phosphoglycerides	28.2846	TRUE	Free.Cholesterol.in.Small.HDL / Total.Concentration.of.Lipoprotein.Particles	.	.	.	14.7397	Free cholesterol to total lipids ratio in large LDL	25.9362	Free.Cholesterol.in.Small.HDL / Total.Concentration.of.Lipoprotein.Particles	2.6453	2.52912
17:4692640:G:T	324	2076	VMO1,GLTPD2	MAF<1%	FALSE	FALSE	FALSE	FALSE	FALSE	FALSE	FALSE	FALSE	.	not annotated	0.995337	rs79202680	17	4692640	T	G	1	rs79202680+rs72836561	58.1314	TRUE	logTG	4.72342	FALSE	Total.Triglycerides	26.2828	TRUE	Triglycerides.in.IDL	.	.	.	26.2828	TRUE	Triglycerides.in.IDL	38.6703	TRUE	Triglycerides.in.Large.LDL / Total.Fatty.Acids	.	.	.	11.4656	Cholesterol to total lipids ratio in IDL	15.9918	Total.Lipids.in.Large.VLDL / Concentration.of.Large.VLDL.Particles	21.5594	0
11:122518525:A:G	325	1625	RP11-266E8.2-UBASH3B	r2 = 0.916 with rs7930518	FALSE	FALSE	FALSE	FALSE	FALSE	FALSE	FALSE	FALSE	.	not annotated	0.621174	rs6589939	11	122518525	G	A	4	rs6589939+rs964184+rs192489212+rs174564+rs10838684	58.1085	TRUE	HDL	10.3051	TRUE	HDL.Cholesterol	15.2389	TRUE	Glycoprotein.Acetyls	.	.	.	15.2389	TRUE	Glycoprotein.Acetyls	18.48	TRUE	Glycoprotein.Acetyls / Average.Diameter.for.VLDL.Particles	.	.	.	2.44702	Free cholesterol to total lipids ratio in medium HDL	8.38715	Triglycerides.in.Small.HDL / Monounsaturated.Fatty.Acids	4.93378	0
15:59277019:T:C	326	1928	RNF111	r2 = 1 with rs112147665	FALSE	FALSE	FALSE	FALSE	FALSE	FALSE	FALSE	FALSE	.	not annotated	0.999653	rs112147665	15	59277019	C	T	2	rs112147665+rs261290+rs55707100	58.063	TRUE	HDL	3.5382	FALSE	HDL.Cholesterol	23.7161	TRUE	Triglycerides.in.Large.HDL	.	.	.	23.7161	TRUE	Triglycerides.in.Large.HDL	29.0247	TRUE	Phospholipids.in.Small.HDL / Triglycerides.in.Large.HDL	.	.	.	16.0234	Free cholesterol to total lipids ratio in small HDL	26.5805	Free.Cholesterol.in.Small.HDL / Concentration.of.Small.HDL.Particles	20.1779	0
5:75241150:C:CT	327	761	RP11-524L6.2-CTC-235G5.1	primary	TRUE	TRUE	FALSE	FALSE	FALSE	FALSE	FALSE	FALSE	.	not annotated	0.91419	rs139733342	5	75241150	CT	C	7	rs139733342+rs12916+rs12657266+rs116734477+rs6869845+rs11745587+rs3010275+rs11167778	57.6234	TRUE	LDL	0.0801939	FALSE	Clinical.LDL.Cholesterol	1.29873	FALSE	Glycoprotein.Acetyls	.	.	.	2.07211	FALSE	Free cholesterol to total lipids ratio in IDL	2.07211	FALSE	Free.Cholesterol.in.IDL / Total.Lipids.in.IDL	.	.	.	1.58995	Free cholesterol to total lipids ratio in IDL	1.72611	Cholesteryl.Esters.in.IDL / Cholesterol.in.IDL	1.21854	0.773382
6:127440047:T:C	328	965	RSPO3	r2 = 0.992 with rs72959041	FALSE	FALSE	FALSE	FALSE	FALSE	FALSE	FALSE	FALSE	.	not annotated	0.950159	rs577721086	6	127440047	C	T	6	rs577721086+rs998584+rs9461755+rs9468937+rs672457+rs622871+rs41272086	57.4763	TRUE	logTG	21.8138	TRUE	Total.Triglycerides	24.3781	TRUE	Phospholipids.in.Large.VLDL	.	.	.	26.2624	TRUE	Inverse Ratio of triglycerides to phosphoglycerides	38.2431	TRUE	Triglycerides.in.Small.LDL / Monounsaturated.Fatty.Acids	.	.	.	19.2738	Free cholesterol to total lipids ratio in large LDL	26.7415	Free.Cholesterol.in.Small.HDL / Total.Concentration.of.Lipoprotein.Particles	2.56437	1.88424
4:69491284:A:T	329	630	RP11-1267H10.3,RP11-1267H10.1-RP11-1267H10.3	r2 = 0.995 with rs34707604	FALSE	FALSE	FALSE	FALSE	FALSE	FALSE	FALSE	FALSE	.	not annotated	0.755253	rs4860987	4	69491284	T	A	3	rs4860987+rs187918276+rs537526354+rs181372486	57.2798	TRUE	LDL	13.792	TRUE	Clinical.LDL.Cholesterol	34.0495	TRUE	Omega.3.Fatty.Acids	.	.	.	34.0495	TRUE	Omega.3.Fatty.Acids	36.8899	TRUE	Albumin / Omega.3.Fatty.Acids	.	.	.	5.20558	Triglycerides to total lipids ratio in large VLDL	29.4008	Cholesteryl.Esters.in.Medium.HDL / Cholesterol.in.Medium.HDL	20.2575	0
19:58662235:C:T	330	2461	ZNF329	r2 = 1 with rs35081008	FALSE	FALSE	FALSE	FALSE	FALSE	FALSE	FALSE	FALSE	.	not annotated	0.852933	rs35081008	19	58662235	T	C	7	rs35081008+rs7412+rs73015024+rs58542926+rs62116778+rs540662190+rs681343+rs150262789	56.4868	TRUE	LDL	12.6914	TRUE	Clinical.LDL.Cholesterol	17.3639	TRUE	Cholesteryl.Esters.in.Medium.VLDL	.	.	.	17.3639	TRUE	Cholesteryl.Esters.in.Medium.VLDL	21.7248	TRUE	Free.Cholesterol.in.Small.HDL / Phospholipids.in.IDL	.	.	.	9.5682	Phospholipids to total lipids ratio in very large VLDL	14.361	Concentration.of.HDL.Particles / Total.Concentration.of.Lipoprotein.Particles	4.67251	0
9:107093784:G:T	331	1331	RP11-217O12.1,RP11-217O12.1-OR13F1	r2 = 1 with rs186793936	FALSE	FALSE	FALSE	FALSE	FALSE	FALSE	FALSE	FALSE	.	not annotated	0.999098	rs186793936	9	107093784	T	G	2	rs186793936+rs2740488+rs686030	56.4547	TRUE	HDL	4.88912	FALSE	HDL.Cholesterol	6.43837	FALSE	Triglycerides.in.Large.HDL	.	.	.	6.43837	FALSE	Triglycerides.in.Large.HDL	15.2851	TRUE	Triglycerides.in.Very.Large.HDL / Triglycerides.in.Very.Small.VLDL	.	.	.	2.87323	Phospholipids to total lipids ratio in medium LDL	8.98115	Triglycerides.in.Very.Large.HDL / Triglycerides.in.Very.Small.VLDL	1.54925	0
12:111884608:T:C	332	1744	.	duplicate model	FALSE	FALSE	FALSE	FALSE	FALSE	FALSE	FALSE	FALSE	.	not annotated	.	rs3184504	12	111884608	C	T	.	.	56.2725	TRUE	LDL	.	.	.	.	.	.	.	.	.	.	.	.	.	.	.	.	.	.	.	.	.	.	.	.
4:3443931:A:G	333	604	RGS12,HGFAC	r2 = 1 with rs13108218	FALSE	FALSE	FALSE	FALSE	FALSE	FALSE	FALSE	FALSE	.	not annotated	0.37969	rs13108218	4	3443931	G	A	0	rs13108218	56.1806	TRUE	logTG	25.6292	TRUE	Total.Triglycerides	39.925	TRUE	Omega.6.Fatty.Acids	.	.	.	39.925	TRUE	Omega.6.Fatty.Acids	51.9298	TRUE	Free.Cholesterol.in.Very.Small.VLDL / Phospholipids.in.Small.VLDL	.	.	.	13.4742	Triglycerides to total lipids ratio in very large HDL	27.6469	Total.Lipids.in.Very.Large.HDL / Concentration.of.Very.Large.HDL.Particles	14.2958	0
15:63793238:T:G	334	1939	USP3,AC007950.1-USP3	r2 = 0.715 with rs11636087	FALSE	FALSE	FALSE	FALSE	FALSE	FALSE	FALSE	FALSE	.	not annotated	0.656811	rs11635675	15	63793238	G	T	2	rs11635675+rs139974673+rs1077835	55.1337	TRUE	logTG	15.387	TRUE	Total.Triglycerides	17.2648	TRUE	Triglycerides.in.Small.LDL	.	.	.	17.2648	TRUE	Triglycerides.in.Small.LDL	25.1347	TRUE	Triglycerides.in.Medium.LDL / Triglycerides.in.Large.LDL	.	.	.	10.8092	Free cholesterol to total lipids ratio in large LDL	17.953	Phospholipids.in.Large.LDL / Total.Lipids.in.LDL	1.87784	0
16:72079657:C:T	335	2027	.	duplicate model	FALSE	FALSE	FALSE	FALSE	FALSE	FALSE	FALSE	FALSE	.	not annotated	.	rs77303550	16	72079657	T	C	.	.	54.6992	TRUE	nonHDL	.	.	.	.	.	.	.	.	.	.	.	.	.	.	.	.	.	.	.	.	.	.	.	.
5:74639544:CTTGTA:C	336	745	.	duplicate model	FALSE	FALSE	FALSE	FALSE	FALSE	FALSE	FALSE	FALSE	.	not annotated	.	rs10590407	5	74639544	C	CTTGTA	.	.	54.4979	TRUE	LDL	.	.	.	.	.	.	.	.	.	.	.	.	.	.	.	.	.	.	.	.	.	.	.	.
19:11191729:C:T	337	2293	.	duplicate model	FALSE	FALSE	FALSE	FALSE	FALSE	FALSE	FALSE	FALSE	.	not annotated	.	rs138294113	19	11191729	T	C	.	.	54.3224	TRUE	nonHDL	.	.	.	.	.	.	.	.	.	.	.	.	.	.	.	.	.	.	.	.	.	.	.	.
10:46022005:G:A	338	1400	MARCH8	primary	TRUE	TRUE	TRUE	TRUE	TRUE	TRUE	FALSE	TRUE	ALOX5	involved in arachidonic acid metabolism, related to prostaglandin pathways	0.761051	rs55665473	10	46022005	A	G	1	rs55665473+rs2792751	54.2336	TRUE	HDL	21.7803	TRUE	HDL.Cholesterol	22.1709	TRUE	Concentration.of.Large.HDL.Particles	3.79768	FALSE	0.57	22.1709	TRUE	Concentration.of.Large.HDL.Particles	30.5468	TRUE	Albumin / Apolipoprotein.A1	6.28333	TRUE	0.86	5.66571	Free cholesterol to total lipids ratio in very large HDL	14.3214	Triglycerides.in.Very.Large.HDL / Triglycerides.in.Very.Small.VLDL	0.39062	0
8:18272881:G:A	339	1185	NAT2-PSD3	r2 = 0.991 with rs35246381	FALSE	FALSE	FALSE	FALSE	FALSE	FALSE	FALSE	FALSE	.	not annotated	0.221094	rs1495741	8	18272881	A	G	4	rs1495741+rs28601761+rs9297994+rs15285+rs4841132	54.0931	TRUE	nonHDL	11.7614	TRUE	Total.Cholesterol.Minus.HDL.C	43.9457	TRUE	Triglycerides.in.Medium.HDL	.	.	.	43.9457	TRUE	Triglycerides.in.Medium.HDL	69.9134	TRUE	Triglycerides.in.Medium.HDL / Tyrosine	.	.	.	22.7357	Phospholipids to total lipids ratio in small LDL	38.0043	Cholesterol.in.Large.HDL / Concentration.of.Large.HDL.Particles	32.1843	0
6:135419018:T:C	340	976	HBS1L	r2 = 0.991 with rs7776054	FALSE	FALSE	FALSE	FALSE	FALSE	FALSE	FALSE	FALSE	.	not annotated	0.740358	rs9399137	6	135419018	C	T	5	rs9399137+rs10455872+rs2235215+rs1800562+rs6689+rs2297359	54.0287	TRUE	LDL	6.78986	FALSE	Clinical.LDL.Cholesterol	23.2993	TRUE	Lactate	.	.	.	23.2993	TRUE	Lactate	73.2416	TRUE	Pyruvate / Lactate	.	.	.	4.86101	Triglycerides to total lipids ratio in small VLDL	49.9423	Pyruvate / Lactate	16.5094	0
8:10644101:G:C	341	1168	SNORD112,PINX1,SOX7	primary	TRUE	TRUE	TRUE	TRUE	TRUE	TRUE	FALSE	FALSE	.	.	0.793652	rs7821812	8	10644101	C	G	3	rs7821812+rs328+rs28601761+rs35246381	53.9101	TRUE	logTG	23.4397	TRUE	Total.Triglycerides	31.2369	TRUE	Average.Diameter.for.VLDL.Particles	5.21902	TRUE	0.85	31.63	TRUE	Cholesteryl esters to total lipids ratio in medium VLDL	41.447	TRUE	Triglycerides.in.Large.LDL / Triglycerides.in.Small.VLDL	5.388	TRUE	0.97	23.2969	Free cholesterol to total lipids ratio in medium LDL	33.1873	Triglycerides.in.Large.LDL / Triglycerides.in.LDL	7.79726	0.393075
6:31106459:C:A	342	866	POLR2LP,CCHCR1,PSORS1C1,PSORS1C2	primary	TRUE	TRUE	FALSE	FALSE	FALSE	FALSE	FALSE	FALSE	.	not annotated	0.920941	rs1265097	6	31106459	A	C	8	rs1265097+rs10455872+rs6689+rs78425119+rs2235215+rs80215559+rs998584+rs9402685+rs17789218	53.7423	TRUE	nonHDL	5.12336	FALSE	Total.Cholesterol.Minus.HDL.C	6.99566	FALSE	Cholesteryl.Esters.in.Small.VLDL	.	.	.	6.99566	FALSE	Cholesteryl.Esters.in.Small.VLDL	7.22649	FALSE	Concentration.of.Small.LDL.Particles / Cholesteryl.Esters.in.VLDL	.	.	.	3.9314	Triglycerides to total lipids ratio in large VLDL	3.9314	Triglycerides.in.Large.VLDL / Total.Lipids.in.Large.VLDL	1.8723	0
12:121416650:A:C	343	1762	.	duplicate model	FALSE	FALSE	FALSE	FALSE	FALSE	FALSE	FALSE	FALSE	.	not annotated	.	rs1169288	12	121416650	C	A	.	.	53.6567	TRUE	nonHDL	.	.	.	.	.	.	.	.	.	.	.	.	.	.	.	.	.	.	.	.	.	.	.	.
7:73022746:G:A	344	1094	MLXIPL	primary	TRUE	TRUE	TRUE	TRUE	TRUE	TRUE	TRUE	TRUE	MLXIPL	Carbohydrate-Responsive Element-Binding Protein (CHREBP), a transcription factor that activates triglyceride synthesis in a glucose-dependent manner	0.871152	rs13246993	7	73022746	A	G	0	rs13246993	53.4449	TRUE	logTG	197.47	TRUE	Total.Triglycerides	249.661	TRUE	Triglycerides.in.Small.VLDL	26.8635	TRUE	1	306.03	TRUE	Triglycerides to total lipids ratio in very small VLDL	348.873	TRUE	Cholesterol.in.Very.Small.VLDL / Triglycerides.in.Small.VLDL	39.4248	TRUE	1	265.461	Cholesterol to total lipids ratio in very small VLDL	285.487	Cholesteryl.Esters.in.Large.LDL / Cholesterol.in.Large.LDL	52.191	56.3683
18:46545976:G:C	345	2219	.	duplicate model	FALSE	FALSE	FALSE	FALSE	FALSE	FALSE	FALSE	FALSE	.	not annotated	.	rs538969346	18	46545976	C	G	.	.	53.2396	TRUE	LDL	.	.	.	.	.	.	.	.	.	.	.	.	.	.	.	.	.	.	.	.	.	.	.	.
1:27688814:C:T	346	31	MAP3K6	primary	TRUE	TRUE	FALSE	FALSE	FALSE	FALSE	FALSE	FALSE	.	not annotated	0.963219	rs41309280	1	27688814	T	C	22	rs41309280+rs12740374+rs11591147+rs11207980+rs2587534+rs35148262+rs2642438+rs557402933+rs186538116+rs4970705+rs114165349+rs7551124+rs1497406+rs191875604+rs574313788+rs165316+rs115383270+rs2296288+rs7519734+rs570553136+rs181473381+rs2022003+rs6676150	53.2358	TRUE	TC	0.39261	FALSE	Total.Cholesterol	4.68149	FALSE	Citrate	.	.	.	4.68149	FALSE	Citrate	4.79513	FALSE	Citrate / Degree.of.Unsaturation	.	.	.	1.79296	Cholesteryl esters to total lipids ratio in large LDL	1.79296	Cholesteryl.Esters.in.Large.LDL / Total.Lipids.in.Large.LDL	4.28888	0
8:116657911:T:G	347	1250	TRPS1	primary	TRUE	TRUE	TRUE	TRUE	TRUE	TRUE	TRUE	FALSE	.	.	0.717317	rs2721961	8	116657911	G	T	5	rs2721961+rs28601761+rs9297994+rs15285+rs4841132+rs1495741	53.0186	TRUE	nonHDL	21.0865	TRUE	Total.Cholesterol.Minus.HDL.C	29.2516	TRUE	Free.Cholesterol.in.Very.Small.VLDL	6.61504	TRUE	0.43	29.2516	TRUE	Free.Cholesterol.in.Very.Small.VLDL	34.8006	TRUE	Free.Cholesterol.in.Very.Small.VLDL / Albumin	6.22722	TRUE	0.61	6.06844	Free cholesterol to total lipids ratio in large HDL	12.178	Albumin / Polyunsaturated.Fatty.Acids	8.16509	0
10:113940329:T:C	348	1454	GPAM	r2 = 0.996 with rs2803619	FALSE	FALSE	FALSE	FALSE	FALSE	FALSE	FALSE	FALSE	.	not annotated	0.273737	rs2792751	10	113940329	C	T	0	rs2792751	52.8545	TRUE	HDL	44.6453	TRUE	HDL.Cholesterol	47.4121	TRUE	Free.Cholesterol.in.HDL	.	.	.	51.3412	TRUE	Cholesteryl esters to total lipids ratio in very small VLDL	80.4376	TRUE	Concentration.of.Large.LDL.Particles / Cholesteryl.Esters.in.IDL	.	.	.	37.3064	Phospholipids to total lipids ratio in very small VLDL	71.1987	Concentration.of.LDL.Particles / Total.Cholesterol.Minus.HDL.C	2.76674	3.92912
4:103766720:G:A	349	688	UBE2D3,RP11-10L12.4	primary	TRUE	TRUE	FALSE	FALSE	FALSE	FALSE	FALSE	FALSE	.	not annotated	0.963475	rs74332078	4	103766720	A	G	10	rs74332078+rs13107325+rs2167750+rs114816312+rs138307849+rs73243877+rs1425485+rs547953616+rs342469+rs1051613+rs12511373	52.7747	TRUE	HDL	0.0678119	FALSE	HDL.Cholesterol	1.40925	FALSE	Phenylalanine	.	.	.	1.88478	FALSE	Phospholipids to total lipids ratio in chylomicrons and extremely large VLDL	2.53578	FALSE	Total.Lipids.in.Large.VLDL / Concentration.of.Large.VLDL.Particles	.	.	.	1.7728	Phospholipids to total lipids ratio in chylomicrons and extremely large VLDL	2.26824	Total.Lipids.in.Large.VLDL / Concentration.of.Large.VLDL.Particles	1.34144	0.475522
9:107620835:G:A	350	1336	ABCA1	MAF<1%	FALSE	FALSE	FALSE	FALSE	FALSE	FALSE	FALSE	FALSE	.	not annotated	0.999967	rs9282541	9	107620835	A	G	0	rs9282541	52.4119	TRUE	HDL	0.994565	FALSE	HDL.Cholesterol	3.36509	FALSE	Concentration.of.Very.Large.HDL.Particles	.	.	.	3.36509	FALSE	Concentration.of.Very.Large.HDL.Particles	4.36559	FALSE	Concentration.of.Very.Large.HDL.Particles / Histidine	.	.	.	3.04043	Free cholesterol to total lipids ratio in small HDL	3.51335	Triglycerides.in.Small.HDL / Triglycerides.in.Very.Small.VLDL	2.37052	0
15:58723426:A:G	351	1919	RP11-355N15.1,LIPC,ALDH1A2	primary	TRUE	TRUE	TRUE	TRUE	TRUE	TRUE	FALSE	FALSE	ALDH1A2 (2)	secondary association with LPmtr gene	0.780636	rs1077835	15	58723426	G	A	0	rs1077835	52.3819	TRUE	TC	176.508	TRUE	Total.Cholesterol	1915.02	TRUE	Triglycerides.in.Large.HDL	315.226	TRUE	1	1915.02	TRUE	Triglycerides.in.Large.HDL	2439.4	TRUE	Free.Cholesterol.in.Small.HDL / Concentration.of.Small.HDL.Particles	405.525	TRUE	1	1393.33	Free cholesterol to total lipids ratio in small HDL	2314.33	Free.Cholesterol.in.Small.HDL / Concentration.of.Small.HDL.Particles	1738.51	0
12:111370980:C:T	352	1739	MYL2-RP1-46F2.2,RP1-46F2.2	primary	TRUE	TRUE	FALSE	FALSE	FALSE	FALSE	FALSE	FALSE	.	not annotated	0.480327	rs4766519	12	111370980	T	C	16	rs4766519+rs1169288+rs3184504+rs2250751+rs149871778+rs35882350+rs11057840+rs75667995+rs76895963+rs61177162+rs11175540+rs11114055+rs11066412+rs28461471+rs61754230+rs11172134+rs1196760	52.3556	TRUE	LDL	0.169992	FALSE	Clinical.LDL.Cholesterol	1.47298	FALSE	Histidine	.	.	.	1.47298	FALSE	Histidine	3.11432	FALSE	Phospholipids.in.Medium.LDL / Concentration.of.Medium.LDL.Particles	.	.	.	1.14663	Phospholipids to total lipids ratio in medium LDL	2.35782	Phospholipids.in.Medium.LDL / Concentration.of.Medium.LDL.Particles	1.30299	0
7:17920613:C:T	353	1048	SNX13	primary	TRUE	TRUE	TRUE	TRUE	TRUE	TRUE	TRUE	FALSE	.	.	0.604565	rs10242866	7	17920613	T	C	3	rs10242866+rs55747707+rs11762784+rs79949326	52.1543	TRUE	HDL	13.5558	TRUE	HDL.Cholesterol	14.3503	TRUE	Cholesteryl.Esters.in.HDL	3.97899	TRUE	0.32	17.7083	TRUE	Phospholipids to total lipids ratio in medium HDL	31.384	TRUE	Albumin / Total.Concentration.of.Lipoprotein.Particles	6.17898	TRUE	0.94	11.2493	Phospholipids to total lipids ratio in very small VLDL	18.8515	Albumin / Total.Concentration.of.Lipoprotein.Particles	0.79445	3.35798
11:122523596:G:A	354	1627	UBASH3B,RP11-266E8.2-UBASH3B	primary	TRUE	TRUE	TRUE	TRUE	TRUE	FALSE	FALSE	FALSE	.	.	0.622918	rs7930518	11	122523596	A	G	3	rs7930518+rs964184+rs174564+rs74612335	51.8416	TRUE	TC	13.1656	TRUE	Total.Cholesterol	16.012	TRUE	Glycoprotein.Acetyls	2.34535	FALSE	0.41	16.012	TRUE	Glycoprotein.Acetyls	19.3481	TRUE	Glycoprotein.Acetyls / Average.Diameter.for.VLDL.Particles	2.3553	FALSE	0.51	2.32548	Free cholesterol to total lipids ratio in very large HDL	7.30012	Triglycerides.in.Small.HDL / Monounsaturated.Fatty.Acids	2.84644	0
8:59388565:T:C	355	1222	UBXN2B-CYP7A1	primary	TRUE	TRUE	TRUE	TRUE	TRUE	TRUE	TRUE	TRUE	CYP7A1	catalyses a rate-limiting step in cholesterol catabolism and bile acid biosynthesis	0.337237	rs2081687	8	59388565	C	T	4	rs2081687+rs328+rs28601761+rs35246381+rs7821812	51.7721	TRUE	logTG	19.0721	TRUE	Total.Triglycerides	35.5225	TRUE	Triglycerides.in.Very.Large.HDL	5.38574	TRUE	0.95	35.5225	TRUE	Triglycerides.in.Very.Large.HDL	47.9582	TRUE	Triglycerides.in.Very.Large.HDL / Citrate	4.98457	TRUE	0.99	13.8567	Free cholesterol to total lipids ratio in small HDL	31.8267	Cholesteryl.Esters.in.Small.HDL / Concentration.of.Small.HDL.Particles	16.4505	0
9:136151579:TGGTGCAGGCGCAGGAAAAAATTGTGGCAATTCCTCA:T	356	1381	ABO-Y_RNA,ABO	r2 = 0.995 with rs2519093	FALSE	FALSE	FALSE	FALSE	FALSE	FALSE	FALSE	FALSE	.	not annotated	0.81423	rs8176636	9	136151579	T	TGGTGCAGGCGCAGGAAAAAATTGTGGCAATTCCTCA	1	rs8176636+rs2740488	51.2449	TRUE	TC	80.8541	TRUE	Total.Cholesterol	110.487	TRUE	Cholesteryl.Esters.in.Medium.VLDL	.	.	.	126.244	TRUE	Cholesterol to total lipids ratio in large VLDL	141.477	TRUE	Triglycerides.in.Small.LDL / Cholesteryl.Esters.in.Small.VLDL	.	.	.	116.958	Cholesterol to total lipids ratio in large VLDL	118.528	Cholesterol.in.Large.VLDL / Triglycerides.in.VLDL	29.6327	15.757
11:116597714:G:A	357	1579	AP000770.1-BUD13	lead SNP monomorphic	FALSE	FALSE	FALSE	FALSE	FALSE	FALSE	FALSE	FALSE	.	not annotated	0.999996	rs138449252	11	116597714	A	G	0	rs138449252	51.177	TRUE	HDL	.	.	.	.	.	.	.	.	.	.	.	.	.	.	.	.	.	.	.	.	.	.	.	.
1:109817838:T:C	358	154	.	duplicate model	FALSE	FALSE	FALSE	FALSE	FALSE	FALSE	FALSE	FALSE	.	not annotated	.	rs660240	1	109817838	C	T	.	.	51.1644	TRUE	nonHDL	.	.	.	.	.	.	.	.	.	.	.	.	.	.	.	.	.	.	.	.	.	.	.	.
1:56840574:A:C	359	85	RP11-504A18.1-AC119674.1,AC119674.1	r2 = 1 with rs186538116	FALSE	FALSE	FALSE	FALSE	FALSE	FALSE	FALSE	FALSE	.	not annotated	0.999935	rs186538116	1	56840574	C	A	7	rs186538116+rs12740374+rs11591147+rs10889333+rs556107+rs114165349+rs557402933+rs9438905	51.1439	TRUE	nonHDL	0.0833179	FALSE	Total.Cholesterol.Minus.HDL.C	0.976567	FALSE	Glucose	.	.	.	0.976567	FALSE	Glucose	1.25907	FALSE	Triglycerides.in.Chylomicrons.and.Extremely.Large.VLDL / Phospholipids.in.Chylomicrons.and.Extremely.Large.VLDL	.	.	.	0.599367	Cholesterol to total lipids ratio in small LDL	0.773744	Omega.6.Fatty.Acids / Total.Esterified.Cholesterol	0.893249	0
8:144302570:T:C	360	1281	GPIHBP1-ZFP41,GPIHBP1	r2 = 0.926 with rs7832515	FALSE	FALSE	FALSE	FALSE	FALSE	FALSE	FALSE	FALSE	.	not annotated	0.8145	rs7817574	8	144302570	C	T	4	rs7817574+rs15285+rs9987289+rs2954038+rs3808460	51.0635	TRUE	HDL	16.1729	TRUE	HDL.Cholesterol	23.821	TRUE	Phospholipids.in.HDL	.	.	.	28.4763	TRUE	Phospholipids to total lipids ratio in small HDL	43.6385	TRUE	Total.Lipids.in.Small.LDL / Total.Free.Cholesterol	.	.	.	19.9976	Phospholipids to total lipids ratio in small HDL	37.0853	Total.Lipids.in.Small.LDL / Total.Free.Cholesterol	7.64812	4.65533
2:118843158:G:A	361	428	INSIG2,RN7SL111P-INSIG2	primary	TRUE	TRUE	TRUE	TRUE	TRUE	FALSE	FALSE	TRUE	INSIG2	mediates feedback control of cholesterol synthesis by controlling SCAP and HMGCR	0.900497	rs55938402	2	118843158	A	G	6	rs55938402+rs934197+rs4299376+rs1260326+rs907866+rs113867238+rs10184673	50.9747	TRUE	TC	13.3116	TRUE	Total.Cholesterol	17.4845	TRUE	Cholesteryl.Esters.in.Very.Small.VLDL	2.1225	FALSE	0.19	17.4845	TRUE	Cholesteryl.Esters.in.Very.Small.VLDL	18.8739	TRUE	Phospholipids.in.IDL / Albumin	2.00241	FALSE	0.18	5.39357	Free cholesterol to total lipids ratio in large HDL	6.77431	Triglycerides.in.Small.VLDL / Phospholipids.in.VLDL	4.17292	0
1:63070537:AGTTAATGTG:A	362	112	DOCK7,ANGPTL3,AL138847.1	r2 = 0.984 with rs598253	FALSE	FALSE	FALSE	FALSE	FALSE	FALSE	FALSE	FALSE	.	not annotated	0.645301	rs34483103	1	63070537	A	AGTTAATGTG	2	rs34483103+rs28362286+rs12740374	50.9101	TRUE	TC	86.0214	TRUE	Total.Cholesterol	275.384	TRUE	Polyunsaturated.Fatty.Acids	.	.	.	275.384	TRUE	Polyunsaturated.Fatty.Acids	323.811	TRUE	Albumin / Polyunsaturated.Fatty.Acids	.	.	.	159.049	Cholesteryl esters to total lipids ratio in small LDL	235.496	Free.Cholesterol.in.Small.LDL / LDL.Cholesterol	189.363	0
19:58662235:C:T	363	2463	ZNF329	primary	TRUE	TRUE	TRUE	TRUE	TRUE	TRUE	FALSE	FALSE	.	.	0.852933	rs35081008	19	58662235	T	C	7	rs35081008+rs7412+rs73015024+rs58542926+rs7255743+rs516246+rs62116778+rs75916629	50.9031	TRUE	TC	8.92978	TRUE	Total.Cholesterol	17.3552	TRUE	Cholesteryl.Esters.in.Medium.VLDL	2.68647	FALSE	0.23	17.3552	TRUE	Cholesteryl.Esters.in.Medium.VLDL	21.7167	TRUE	Free.Cholesterol.in.Small.HDL / Phospholipids.in.IDL	2.553	FALSE	0.28	9.57148	Phospholipids to total lipids ratio in very large VLDL	14.3577	Concentration.of.HDL.Particles / Total.Concentration.of.Lipoprotein.Particles	8.42539	0
9:107661742:A:C	364	1342	.	duplicate model	FALSE	FALSE	FALSE	FALSE	FALSE	FALSE	FALSE	FALSE	.	not annotated	.	rs2740488	9	107661742	C	A	.	.	50.7033	TRUE	LDL	.	.	.	.	.	.	.	.	.	.	.	.	.	.	.	.	.	.	.	.	.	.	.	.
8:11702594:G:C	365	1174	RP11-589N15.2,CTSB	primary	TRUE	TRUE	FALSE	TRUE	TRUE	TRUE	TRUE	TRUE	CTSB	regulates hepatic lipid metabolism by reducing free fatty acid uptake and VLDL secretion	0.736459	rs709821	8	11702594	C	G	13	rs709821+rs28601761+rs9987289+rs9297994+rs35570672+rs2737245+rs9298506+rs11787335+rs117139027+rs7839474+rs900776+rs4385461+rs2936512+rs4645567	50.4962	TRUE	TC	0.499172	FALSE	Total.Cholesterol	16.0864	TRUE	Triglycerides.in.Small.HDL	4.43162	TRUE	0.45	18.4141	TRUE	Triglycerides to total lipids ratio in very large HDL	22.0727	TRUE	Triglycerides.in.Large.HDL / Phospholipids.in.Very.Large.HDL	4.25033	TRUE	0.74	12.2452	Free cholesterol to total lipids ratio in large LDL	15.7724	Concentration.of.Medium.HDL.Particles / HDL.Cholesterol	15.5872	2.3278
11:64004723:G:C	366	1546	FKBP2,RP11-783K16.14,DNAJC4,VEGFB	primary	TRUE	TRUE	TRUE	TRUE	TRUE	TRUE	FALSE	FALSE	.	.	0.954446	rs56271783	11	64004723	C	G	7	rs56271783+rs964184+rs192489212+rs174564+rs10838684+rs6589939+rs11229252+rs673335	50.4237	TRUE	HDL	15.7794	TRUE	HDL.Cholesterol	22.6463	TRUE	Cholesteryl.Esters.in.Large.HDL	1.71368	FALSE	0.69	25.1307	TRUE	Inverse Ratio of triglycerides to phosphoglycerides	28.5948	TRUE	Free.Cholesterol.in.Small.HDL / Total.Concentration.of.Lipoprotein.Particles	5.06821	TRUE	0.91	14.9788	Free cholesterol to total lipids ratio in large LDL	26.189	Free.Cholesterol.in.Small.HDL / Total.Concentration.of.Lipoprotein.Particles	6.86691	2.48441
2:43473222:G:C	367	364	THADA	MAF<1%	FALSE	FALSE	FALSE	FALSE	FALSE	FALSE	FALSE	FALSE	.	not annotated	0.991736	rs141647229	2	43473222	C	G	15	rs141647229+rs934197+rs4299376+rs1260326+rs150474434+rs17050272+rs10184673+rs4671050+rs12693968+rs140879085+rs79279183+rs1375131+rs1992172+rs1250259+rs191450029+rs6431630	50.4101	TRUE	LDL	2.26729	FALSE	Clinical.LDL.Cholesterol	2.47513	FALSE	Concentration.of.Large.LDL.Particles	.	.	.	2.47513	FALSE	Concentration.of.Large.LDL.Particles	3.17411	FALSE	Phospholipids.in.Medium.VLDL / Concentration.of.Medium.VLDL.Particles	.	.	.	0.887884	Free cholesterol to total lipids ratio in very large HDL	1.78891	Concentration.of.HDL.Particles / Total.Concentration.of.Lipoprotein.Particles	0.207843	0
2:136901607:A:G	368	444	CXCR4-HNRNPKP2	primary	TRUE	TRUE	FALSE	FALSE	FALSE	FALSE	FALSE	FALSE	.	not annotated	0.750573	rs4954392	2	136901607	G	A	27	rs4954392+rs934197+rs4299376+rs1260326+rs907866+rs113867238+rs10184673+rs55938402+rs17050272+rs887829+rs1375131+rs4671050+rs556971810+rs1250259+rs10164853+rs1992172+rs2194562+rs954680+rs6734238+rs72613899+rs3820897+rs2441355+rs998451+rs13394970+rs12989861+rs10171847+rs268132+rs35825582	50.4067	TRUE	TC	0.845454	FALSE	Total.Cholesterol	2.14872	FALSE	Leucine	.	.	.	2.14872	FALSE	Leucine	3.47445	FALSE	Leucine / Linoleic.Acid	.	.	.	0.718551	Free cholesterol to total lipids ratio in small HDL	1.48022	Triglycerides.in.Large.LDL / Valine	1.30326	0
8:10647823:A:G	369	1169	PINX1,SOX7	primary	TRUE	TRUE	FALSE	FALSE	TRUE	TRUE	TRUE	FALSE	.	.	0.423449	rs11250076	8	10647823	G	A	15	rs11250076+rs28601761+rs9987289+rs9297994+rs2737245+rs11787335+rs9298506+rs1495741+rs117139027+rs900776+rs62509311+rs4645567+rs2928576+rs13256216+rs12114596+rs9692668	50.3872	TRUE	LDL	3.01225	FALSE	Clinical.LDL.Cholesterol	9.31724	FALSE	Average.Diameter.for.VLDL.Particles	.	.	.	9.31724	FALSE	Average.Diameter.for.VLDL.Particles	16.9254	TRUE	Triglycerides.in.Small.LDL / Triglycerides.in.Medium.LDL	2.10218	FALSE	1	6.65972	Cholesterol to total lipids ratio in medium VLDL	14.6322	Triglycerides.in.Small.LDL / Triglycerides.in.Medium.LDL	6.30499	0
12:4384844:T:G	370	1643	CCND2-AS2,CCND2,CCND2-AS1	r2 = 1 with rs76895963	FALSE	FALSE	FALSE	FALSE	FALSE	FALSE	FALSE	FALSE	.	not annotated	0.984639	rs76895963	12	4384844	G	T	0	rs76895963	50.2919	TRUE	logTG	15.8174	TRUE	Total.Triglycerides	19.0558	TRUE	Total.Fatty.Acids	.	.	.	19.0558	TRUE	Total.Fatty.Acids	19.7222	TRUE	Triglycerides.in.Medium.LDL / Creatinine	.	.	.	4.80979	Cholesterol to total lipids ratio in large HDL	11.7979	Free.Cholesterol.in.Medium.HDL / Cholesteryl.Esters.in.HDL	3.23838	0
11:75450576:T:C	371	1561	RN7SL786P,MOGAT2-RN7SL786P	primary	TRUE	TRUE	TRUE	TRUE	TRUE	TRUE	TRUE	TRUE	MOGAT2	plays a central role in absorption of dietary fat in the small intestine by catalyzing the resynthesis of triacylglycerol in enterocytes	0.842513	rs673335	11	75450576	C	T	6	rs673335+rs964184+rs192489212+rs174564+rs10838684+rs6589939+rs11229252	50.2343	TRUE	HDL	30.1979	TRUE	HDL.Cholesterol	75.0661	TRUE	Omega.3.Fatty.Acids	8.30323	TRUE	1	75.0661	TRUE	Omega.3.Fatty.Acids	108.334	TRUE	Triglycerides.in.Very.Small.VLDL / Omega.3.Fatty.Acids	19.8568	TRUE	1	31.2841	Phospholipids to total lipids ratio in IDL	72.7142	Concentration.of.LDL.Particles / Total.Cholesterol.Minus.HDL.C	44.8682	0
7:80300449:T:G	372	1104	CD36	MAF<1%	FALSE	FALSE	FALSE	FALSE	FALSE	FALSE	FALSE	FALSE	.	not annotated	0.999978	rs3211938	7	80300449	G	T	0	rs3211938	50.2082	TRUE	HDL	0.571371	FALSE	HDL.Cholesterol	2.16839	FALSE	Cholesteryl.Esters.in.Small.HDL	.	.	.	2.16839	FALSE	Cholesteryl.Esters.in.Small.HDL	3.17249	FALSE	Cholesteryl.Esters.in.Small.HDL / Histidine	.	.	.	1.26678	Cholesterol to total lipids ratio in IDL	1.83788	Cholesterol.in.Medium.HDL / Total.Lipids.in.HDL	1.59702	0
19:45413233:G:T	373	2406	.	duplicate model	FALSE	FALSE	FALSE	FALSE	FALSE	FALSE	FALSE	FALSE	.	not annotated	.	rs1065853	19	45413233	T	G	.	.	50.1254	TRUE	TC	.	.	.	.	.	.	.	.	.	.	.	.	.	.	.	.	.	.	.	.	.	.	.	.
4:69491456:T:C	374	632	RP11-1267H10.3,RP11-1267H10.1-RP11-1267H10.3	primary	TRUE	TRUE	TRUE	TRUE	TRUE	TRUE	TRUE	FALSE	.	.	0.755252	rs34707604	4	69491456	C	T	2	rs34707604+rs573930512+rs537526354	50.0931	TRUE	nonHDL	18.3147	TRUE	Total.Cholesterol.Minus.HDL.C	34.1774	TRUE	Omega.3.Fatty.Acids	7.67235	TRUE	0.95	34.1774	TRUE	Omega.3.Fatty.Acids	36.9435	TRUE	Glutamine / Omega.3.Fatty.Acids	7.9212	TRUE	0.96	4.7613	Triglycerides to total lipids ratio in large VLDL	30.048	Cholesteryl.Esters.in.Medium.HDL / Cholesterol.in.Medium.HDL	15.8627	0
2:21252534:G:A	375	285	APOB	r2 = 1 with rs13306194	FALSE	FALSE	FALSE	FALSE	FALSE	FALSE	FALSE	FALSE	.	not annotated	0.999749	rs13306194	2	21252534	A	G	0	rs13306194	50.0681	TRUE	LDL	0.679274	FALSE	Clinical.LDL.Cholesterol	1.78747	FALSE	Leucine	.	.	.	1.78747	FALSE	Leucine	3.22718	FALSE	Acetone / Acetate	.	.	.	1.10413	Triglycerides to total lipids ratio in very large VLDL	2.10051	Phospholipids.in.Very.Large.VLDL / Free.Cholesterol.in.Chylomicrons.and.Extremely.Large.VLDL	1.10819	0
2:169827796:G:A	376	461	ABCB11	r2 = 0.994 with rs66491446	FALSE	FALSE	FALSE	FALSE	FALSE	FALSE	FALSE	FALSE	.	not annotated	0.394341	rs10184673	2	169827796	A	G	5	rs10184673+rs934197+rs4299376+rs1260326+rs150474434+rs17050272	50.0665	TRUE	LDL	14.715	TRUE	Clinical.LDL.Cholesterol	21.309	TRUE	Phospholipids.in.IDL	.	.	.	21.309	TRUE	Phospholipids.in.IDL	25.5092	TRUE	Phospholipids.in.IDL / Albumin	.	.	.	11.5053	Free cholesterol to total lipids ratio in small HDL	11.5053	Free.Cholesterol.in.Small.HDL / Total.Lipids.in.Small.HDL	6.59397	0
4:73491622:G:A	377	643	ADAMTS3-HNRNPA1P67	MAF<1%	FALSE	FALSE	FALSE	FALSE	FALSE	FALSE	FALSE	FALSE	.	not annotated	0.999937	rs537526354	4	73491622	A	G	1	rs537526354+rs187918276	49.9508	TRUE	LDL	0.310318	FALSE	Clinical.LDL.Cholesterol	1.92204	FALSE	Lactate	.	.	.	1.92204	FALSE	Lactate	2.7865	FALSE	Lactate / Phenylalanine	.	.	.	1.47495	Phospholipids to total lipids ratio in very large VLDL	1.47495	Phospholipids.in.Very.Large.VLDL / Total.Lipids.in.Very.Large.VLDL	1.61173	0
1:109310728:G:A	378	144	STXBP3,RP11-475E11.2	r2 = 1 with rs115292790	FALSE	FALSE	FALSE	FALSE	FALSE	FALSE	FALSE	FALSE	.	not annotated	0.982021	rs115292790	1	109310728	A	G	32	rs115292790+rs12740374+rs11591147+rs11207980+rs2587534+rs35148262+rs2642438+rs557402933+rs186538116+rs4970705+rs114165349+rs7551124+rs1497406+rs191875604+rs574313788+rs165316+rs115383270+rs2296288+rs7519734+rs570553136+rs181473381+rs2022003+rs6676150+rs41309280+rs188503412+rs7549174+rs880315+rs140559632+rs140266316+rs4655772+rs17853159+rs267733+rs754633424	49.9393	TRUE	TC	1.7066	FALSE	Total.Cholesterol	2.35711	FALSE	Glutamine	.	.	.	2.35711	FALSE	Glutamine	2.55353	FALSE	Omega.6.Fatty.Acids / Average.Diameter.for.VLDL.Particles	.	.	.	1.29253	Cholesterol to total lipids ratio in chylomicrons and extremely large VLDL	1.29253	Cholesterol.in.Chylomicrons.and.Extremely.Large.VLDL / Total.Lipids.in.Chylomicrons.and.Extremely.Large.VLDL	0.650509	0
8:9195638:C:T	379	1161	RP11-115J16.1	primary	TRUE	TRUE	FALSE	TRUE	TRUE	TRUE	TRUE	FALSE	.	.	0.77082	rs17149279	8	9195638	T	C	6	rs17149279+rs328+rs28601761+rs35246381+rs7821812+rs2081687+rs4320509	49.9101	TRUE	logTG	1.94209	FALSE	Total.Triglycerides	28.5299	TRUE	Glycine	2.55132	FALSE	0.79	28.5299	TRUE	Glycine	45.3978	TRUE	Glycine / Sphingomyelins	4.4912	TRUE	0.98	15.1468	Phospholipids to total lipids ratio in small VLDL	20.5122	Saturated.Fatty.Acids / Triglycerides.in.HDL	26.5878	0
1:110326545:G:A	380	165	GSTM5-NDUFA5P10	r2 = 1 with rs140266316	FALSE	FALSE	FALSE	FALSE	FALSE	FALSE	FALSE	FALSE	.	not annotated	0.987158	rs140266316	1	110326545	A	G	27	rs140266316+rs12740374+rs11591147+rs11207980+rs2587534+rs35148262+rs2642438+rs557402933+rs186538116+rs4970705+rs114165349+rs7551124+rs1497406+rs191875604+rs574313788+rs165316+rs115383270+rs2296288+rs7519734+rs570553136+rs181473381+rs2022003+rs6676150+rs41309280+rs188503412+rs7549174+rs880315+rs140559632	49.8097	TRUE	TC	0.750133	FALSE	Total.Cholesterol	2.65525	FALSE	Citrate	.	.	.	2.65525	FALSE	Citrate	3.92717	FALSE	Free.Cholesterol.in.Very.Large.HDL / Citrate	.	.	.	1.70989	Free cholesterol to total lipids ratio in large HDL	1.91687	Cholesteryl.Esters.in.Medium.HDL / HDL.Cholesterol	1.90512	0
13:114551993:T:C	381	1834	GAS6	primary	TRUE	TRUE	TRUE	TRUE	TRUE	TRUE	FALSE	FALSE	.	.	0.675135	rs6602909	13	114551993	C	T	0	rs6602909	49.7187	TRUE	TC	15.8645	TRUE	Total.Cholesterol	30.5002	TRUE	Phospholipids.in.Very.Small.VLDL	4.64442	TRUE	0.74	30.5002	TRUE	Phospholipids.in.Very.Small.VLDL	35.044	TRUE	Phospholipids.in.Small.HDL / Total.Fatty.Acids	3.59094	FALSE	0.87	6.93937	Cholesteryl esters to total lipids ratio in medium HDL	19.9083	Concentration.of.HDL.Particles / Total.Concentration.of.Lipoprotein.Particles	14.6357	0
6:116323910:T:A	382	958	FRK	primary	TRUE	TRUE	TRUE	TRUE	TRUE	TRUE	FALSE	FALSE	.	.	0.576298	rs1338667	6	116323910	A	T	8	rs1338667+rs10455872+rs6689+rs2235215+rs80215559+rs9402685+rs78425119+rs3800461+rs6457374	49.5243	TRUE	TC	15.7857	TRUE	Total.Cholesterol	15.7857	TRUE	Total.Cholesterol	1.35848	FALSE	0.1	15.7857	TRUE	Total.Cholesterol	18.9766	TRUE	Omega.6.Fatty.Acids / Average.Diameter.for.VLDL.Particles	2.33245	FALSE	0.29	7.15843	Free cholesterol to total lipids ratio in very large VLDL	11.7845	Triglycerides.in.Small.HDL / Total.Lipids.in.Small.VLDL	0	0
7:73651743:T:C	383	1097	RFC2	primary	TRUE	TRUE	FALSE	FALSE	FALSE	FALSE	FALSE	FALSE	.	not annotated	0.958436	rs3135688	7	73651743	C	T	11	rs3135688+rs3812316+rs35753501+rs4731702+rs4722551+rs2070971+rs36104871+rs7808446+rs4410790+rs4142995+rs38205+rs71551223	49.5243	TRUE	logTG	0.920476	FALSE	Total.Triglycerides	2.67133	FALSE	Alanine	.	.	.	2.67133	FALSE	Alanine	3.48503	FALSE	Lactate / Alanine	.	.	.	1.95448	Phospholipids to total lipids ratio in medium LDL	1.95448	Phospholipids.in.Medium.LDL / Total.Lipids.in.Medium.LDL	1.75085	0
1:58137322:T:C	384	90	DAB1	MAF<1%	FALSE	FALSE	FALSE	FALSE	FALSE	FALSE	FALSE	FALSE	.	not annotated	0.999972	rs145440120	1	58137322	C	T	29	rs145440120+rs12740374+rs11591147+rs553427+rs598253+rs557402933+rs186538116+rs10903129+rs114165349+rs2642438+rs2391159+rs191875604+rs41309280+rs267733+rs1689801+rs1497406+rs140266316+rs115292790+rs570553136+rs17853159+rs4390169+rs754633424+rs184980867+rs111232683+rs2296288+rs7551124+rs140559632+rs41311276+rs1123571+rs566523636	49.4802	TRUE	LDL	1.28728	FALSE	Clinical.LDL.Cholesterol	3.097	FALSE	Cholesterol.in.Small.HDL	.	.	.	3.70556	FALSE	Cholesteryl esters to total lipids ratio in large LDL	5.30555	FALSE	Cholesterol.in.Large.LDL / Concentration.of.IDL.Particles	.	.	.	1.72036	Cholesteryl esters to total lipids ratio in large LDL	3.64072	Phospholipids.in.Large.LDL / Concentration.of.IDL.Particles	1.80972	0.608556
8:145044104:C:T	385	1283	PLEC	r2 = 0.862 with rs1134030	FALSE	FALSE	FALSE	FALSE	FALSE	FALSE	FALSE	FALSE	.	not annotated	0.642332	rs11787335	8	145044104	T	C	4	rs11787335+rs28601761+rs9987289+rs9297994+rs2737245	49.4597	TRUE	LDL	14.4374	TRUE	Clinical.LDL.Cholesterol	19.1172	TRUE	Cholesteryl.Esters.in.Medium.VLDL	.	.	.	19.1172	TRUE	Cholesteryl.Esters.in.Medium.VLDL	22.8499	TRUE	Triglycerides.in.Small.HDL / Cholesteryl.Esters.in.Small.VLDL	.	.	.	10.4678	Free cholesterol to total lipids ratio in small HDL	17.3802	Triglycerides.in.Small.HDL / Total.Lipids.in.Small.VLDL	4.67983	0
6:30764907:G:A	386	864	LINC00243,HCG20,HCG20-LINC00243	primary	TRUE	TRUE	FALSE	TRUE	TRUE	FALSE	FALSE	FALSE	.	.	0.817094	rs1264377	6	30764907	A	G	26	rs1264377+rs41272086+rs998584+rs2263329+rs17585887+rs72959041+rs76716928+rs9296406+rs11759230+rs142449754+rs1338668+rs17209803+rs672341+rs115675705+rs78425119+rs2608629+rs6924387+rs115003989+rs2750415+rs9347737+rs147829643+rs11754612+rs9368561+rs2245133+rs1240811+rs9399136+rs565216100	48.7878	TRUE	HDL	2.01544	FALSE	HDL.Cholesterol	9.67882	TRUE	Polyunsaturated.Fatty.Acids	0.700354	FALSE	0.65	9.67882	FALSE	Polyunsaturated.Fatty.Acids	15.9823	TRUE	Creatinine / Polyunsaturated.Fatty.Acids	1.35433	FALSE	0.96	5.34988	Phospholipids to total lipids ratio in small LDL	7.22608	Free.Cholesterol.in.Large.HDL / Concentration.of.Large.HDL.Particles	7.66338	0
3:58391293:C:G	387	529	PXK	primary	TRUE	TRUE	TRUE	TRUE	TRUE	TRUE	FALSE	FALSE	.	.	0.917452	rs9844432	3	58391293	G	C	1	rs9844432+rs13076933	48.7305	TRUE	TC	11.4356	TRUE	Total.Cholesterol	16.4681	TRUE	Cholesteryl.Esters.in.Medium.VLDL	1.08231	FALSE	0.09	16.4681	TRUE	Cholesteryl.Esters.in.Medium.VLDL	18.0878	TRUE	Free.Cholesterol.in.Small.HDL / Total.Cholesterol	0.920504	FALSE	0.04	8.30505	Phospholipids to total lipids ratio in very large VLDL	11.7726	Triglycerides.in.Small.HDL / Phospholipids.in.VLDL	5.0325	0
12:57738600:T:G	388	1700	R3HDM2	r2 = 0.993 with rs12313762	FALSE	FALSE	FALSE	FALSE	FALSE	FALSE	FALSE	FALSE	.	not annotated	0.755175	rs79395356	12	57738600	G	T	2	rs79395356+rs76895963+rs12303671	48.6234	TRUE	logTG	16.6141	TRUE	Total.Triglycerides	27.3922	TRUE	Cholesteryl.Esters.in.Small.VLDL	.	.	.	27.3922	TRUE	Cholesteryl.Esters.in.Small.VLDL	34.1835	TRUE	Cholesteryl.Esters.in.Small.VLDL / Tyrosine	.	.	.	11.5745	Triglycerides to total lipids ratio in medium HDL	24.0806	Total.Esterified.Cholesterol / Total.Cholesterol	10.7781	0
1:109817590:G:T	389	147	.	duplicate model	FALSE	FALSE	FALSE	FALSE	FALSE	FALSE	FALSE	FALSE	.	not annotated	.	rs12740374	1	109817590	T	G	.	.	48.52	TRUE	nonHDL	.	.	.	.	.	.	.	.	.	.	.	.	.	.	.	.	.	.	.	.	.	.	.	.
17:76387363:G:T	390	2199	PGS1	primary	TRUE	TRUE	TRUE	TRUE	TRUE	TRUE	TRUE	FALSE	.	.	0.504492	rs11657987	17	76387363	T	G	3	rs11657987+rs77542162+rs186021206+rs11869730	48.4101	TRUE	TC	18.9558	TRUE	Total.Cholesterol	26.9932	TRUE	Total.Concentration.of.Lipoprotein.Particles	3.47281	FALSE	0.82	26.9932	TRUE	Total.Concentration.of.Lipoprotein.Particles	34.7059	TRUE	Albumin / Total.Concentration.of.Lipoprotein.Particles	4.64402	TRUE	0.94	20.2751	Phospholipids to total lipids ratio in small VLDL	23.249	Phospholipids.in.Small.VLDL / Concentration.of.Small.VLDL.Particles	8.03747	0
18:47120600:G:A	391	2231	LIPG,LIPG-SMUG1P1	primary	TRUE	TRUE	TRUE	TRUE	TRUE	TRUE	FALSE	FALSE	LIPG (2)	secondary association with LPmtr gene	0.958622	rs9953437	18	47120600	A	G	0	rs9953437	48.4061	TRUE	TC	11.347	TRUE	Total.Cholesterol	36.7974	TRUE	Phospholipids.in.Medium.HDL	16.2667	TRUE	0.97	36.7974	TRUE	Phospholipids.in.Medium.HDL	47.5258	TRUE	Phospholipids.in.Small.LDL / Total.Free.Cholesterol	19.2218	TRUE	1	13.5891	Cholesteryl esters to total lipids ratio in small LDL	40.7167	Apolipoprotein.B / Remnant.Cholesterol..Non.HDL..Non.LDL..Cholesterol.	25.4503	0
19:45416178:G:T	392	2410	.	duplicate model	FALSE	FALSE	FALSE	FALSE	FALSE	FALSE	FALSE	FALSE	.	not annotated	.	rs483082	19	45416178	T	G	.	.	48.3624	TRUE	logTG	.	.	.	.	.	.	.	.	.	.	.	.	.	.	.	.	.	.	.	.	.	.	.	.
11:47272579:A:G	393	1516	NR1H3,ACP2	r2 = 1 with rs10838684	FALSE	FALSE	FALSE	FALSE	FALSE	FALSE	FALSE	FALSE	.	not annotated	0.696611	rs3758669	11	47272579	G	A	4	rs3758669+rs964184+rs192489212+rs174562+rs56271783	48.3595	TRUE	logTG	10.6408	TRUE	Total.Triglycerides	42.8568	TRUE	Cholesteryl.Esters.in.Large.HDL	.	.	.	42.8568	TRUE	Cholesteryl.Esters.in.Large.HDL	46.4493	TRUE	Phospholipids.in.Small.HDL / Concentration.of.HDL.Particles	.	.	.	19.4227	Phospholipids to total lipids ratio in medium HDL	29.1444	Free.Cholesterol.in.Small.VLDL / Cholesterol.in.Small.VLDL	32.216	0
21:46875775:G:A	394	2560	COL18A1	MAF<1%	FALSE	FALSE	FALSE	FALSE	FALSE	FALSE	FALSE	FALSE	.	not annotated	0.999961	rs114139997	21	46875775	A	G	0	rs114139997	48.3336	TRUE	logTG	0.164062	FALSE	Total.Triglycerides	1.61572	FALSE	Cholesteryl.Esters.in.Small.HDL	.	.	.	2.08499	FALSE	Free cholesterol to total lipids ratio in large VLDL	2.32614	FALSE	Cholesterol.in.Small.LDL / Phospholipids.in.Medium.LDL	.	.	.	1.9126	Free cholesterol to total lipids ratio in large VLDL	2.09033	Triglycerides.in.Small.HDL / Triglycerides.in.Small.VLDL	1.45166	0.46927
1:56840574:A:C	395	86	RP11-504A18.1-AC119674.1,AC119674.1	r2 = 1 with rs186538116	FALSE	FALSE	FALSE	FALSE	FALSE	FALSE	FALSE	FALSE	.	not annotated	0.999935	rs186538116	1	56840574	C	A	7	rs186538116+rs12740374+rs11591147+rs11207980+rs2587534+rs35148262+rs2642438+rs557402933	48.2426	TRUE	TC	0.179108	FALSE	Total.Cholesterol	0.975604	FALSE	Glucose	.	.	.	0.975604	FALSE	Glucose	1.26144	FALSE	Triglycerides.in.Chylomicrons.and.Extremely.Large.VLDL / Phospholipids.in.Chylomicrons.and.Extremely.Large.VLDL	.	.	.	0.591486	Cholesterol to total lipids ratio in small LDL	0.765787	Omega.6.Fatty.Acids / Total.Esterified.Cholesterol	0.796496	0
19:11348521:G:A	396	2306	DOCK6,C19orf80,RN7SL298P	r2 = 0.99 with rs3760782	FALSE	FALSE	FALSE	FALSE	FALSE	FALSE	FALSE	FALSE	.	not annotated	0.925224	rs3745683	19	11348521	A	G	1	rs3745683+rs7412	48.1085	TRUE	HDL	27.3558	TRUE	HDL.Cholesterol	34.9623	TRUE	Phospholipids.in.Medium.HDL	.	.	.	34.9623	TRUE	Phospholipids.in.Medium.HDL	40.2698	TRUE	Phospholipids.in.Medium.HDL / Albumin	.	.	.	12.8418	Phospholipids to total lipids ratio in very small VLDL	29.8407	Concentration.of.LDL.Particles / Total.Cholesterol.Minus.HDL.C	7.60654	0
6:25918225:T:C	397	842	SLC17A2	r2 = 0.941 with rs1800562	FALSE	FALSE	FALSE	FALSE	FALSE	FALSE	FALSE	FALSE	.	not annotated	0.922574	rs80215559	6	25918225	C	T	4	rs80215559+rs10455872+rs6689+rs78425119+rs2235215	48.0386	TRUE	nonHDL	24.3143	TRUE	Total.Cholesterol.Minus.HDL.C	41.1747	TRUE	Free.Cholesterol.in.Small.LDL	.	.	.	43.641	TRUE	Phospholipids to total lipids ratio in small HDL	48.8486	TRUE	Phosphatidylcholines / Total.Esterified.Cholesterol	.	.	.	40.7511	Phospholipids to total lipids ratio in small HDL	41.168	Free.Cholesterol.in.Small.HDL / Phospholipids.in.Small.HDL	16.8604	2.46629
10:93575831:G:A	398	1429	TNKS2	primary	TRUE	TRUE	FALSE	FALSE	FALSE	FALSE	FALSE	FALSE	.	not annotated	0.937391	rs149590572	10	93575831	A	G	9	rs149590572+rs2068888+rs7924036+rs2803619+rs41274050+rs142122182+rs17875327+rs7904738+rs1171616+rs75398587	48.0287	TRUE	logTG	0.892641	FALSE	Total.Triglycerides	2.96619	FALSE	Glycine	.	.	.	2.96619	FALSE	Glycine	3.73085	FALSE	Glycine / Glutamine	.	.	.	1.7049	Cholesterol to total lipids ratio in small HDL	2.12409	Concentration.of.IDL.Particles / Total.Lipids.in.Very.Small.VLDL	2.07355	0
4:3443931:A:G	399	605	RGS12,HGFAC	r2 = 1 with rs13108218	FALSE	FALSE	FALSE	FALSE	FALSE	FALSE	FALSE	FALSE	.	not annotated	0.37969	rs13108218	4	3443931	G	A	3	rs13108218+rs573930512+rs537526354+rs34707604	47.9547	TRUE	nonHDL	25.485	TRUE	Total.Cholesterol.Minus.HDL.C	39.8619	TRUE	Omega.6.Fatty.Acids	.	.	.	39.8619	TRUE	Omega.6.Fatty.Acids	51.9292	TRUE	Free.Cholesterol.in.Very.Small.VLDL / Phospholipids.in.Small.VLDL	.	.	.	13.4404	Triglycerides to total lipids ratio in very large HDL	27.6081	Total.Lipids.in.Very.Large.HDL / Concentration.of.Very.Large.HDL.Particles	14.3769	0
3:135925191:T:A	400	560	RP11-463H24.1,RP11-463H24.1-PCCB	r2 = 0.991 with rs687339	FALSE	FALSE	FALSE	FALSE	FALSE	FALSE	FALSE	FALSE	.	not annotated	0.225849	rs1154988	3	135925191	A	T	1	rs1154988+rs7634917	47.9172	TRUE	HDL	9.46111	TRUE	HDL.Cholesterol	49.4772	TRUE	Phospholipids.in.Very.Small.VLDL	.	.	.	49.4772	TRUE	Phospholipids.in.Very.Small.VLDL	73.2614	TRUE	Concentration.of.Small.HDL.Particles / Phospholipids.in.Very.Small.VLDL	.	.	.	31.6387	Cholesteryl esters to total lipids ratio in IDL	48.1784	Apolipoprotein.B / Phospholipids.in.LDL	40.0161	0
3:12327431:T:G	401	498	GSTM5P1-PPARG,PPARG	primary	TRUE	TRUE	TRUE	TRUE	TRUE	TRUE	TRUE	TRUE	PPARG	controls the peroxisomal beta-oxidation pathway of fatty acids; target of roziglitazone	0.743663	rs13076933	3	12327431	G	T	0	rs13076933	47.8656	TRUE	TC	20.6941	TRUE	Total.Cholesterol	22.9578	TRUE	Phospholipids.in.IDL	3.29573	FALSE	0.18	22.9578	TRUE	Phospholipids.in.IDL	31.9458	TRUE	Albumin / Total.Free.Cholesterol	2.87603	FALSE	0.48	15.6493	Free cholesterol to total lipids ratio in small HDL	15.7464	Triglycerides.in.Small.HDL / Total.Lipids.in.VLDL	2.2637	0
8:55437524:A:G	402	1220	RP11-53M11.2-RP11-53M11.3,RP11-53M11.2	r2 = 1 with rs9298506	FALSE	FALSE	FALSE	FALSE	FALSE	FALSE	FALSE	FALSE	.	not annotated	0.789509	rs9298506	8	55437524	G	A	5	rs9298506+rs28601761+rs9987289+rs9297994+rs35570672+rs2737245	47.8508	TRUE	TC	9.15931	TRUE	Total.Cholesterol	12.9529	TRUE	Concentration.of.Large.LDL.Particles	.	.	.	12.9529	TRUE	Concentration.of.Large.LDL.Particles	13.5607	TRUE	Concentration.of.Large.LDL.Particles / Albumin	.	.	.	2.34175	Triglycerides to total lipids ratio in chylomicrons and extremely large VLDL	5.08059	Total.Lipids.in.Chylomicrons.and.Extremely.Large.VLDL / Concentration.of.Chylomicrons.and.Extremely.Large.VLDL.Particles	3.79363	0
19:58662235:C:T	403	2462	ZNF329	r2 = 1 with rs35081008	FALSE	FALSE	FALSE	FALSE	FALSE	FALSE	FALSE	FALSE	.	not annotated	0.852933	rs35081008	19	58662235	T	C	6	rs35081008+rs7412+rs73015024+rs58542926+rs7255743+rs62116778+rs681343	47.7352	TRUE	nonHDL	12.8058	TRUE	Total.Cholesterol.Minus.HDL.C	17.3503	TRUE	Cholesteryl.Esters.in.Medium.VLDL	.	.	.	17.3503	TRUE	Cholesteryl.Esters.in.Medium.VLDL	21.7158	TRUE	Free.Cholesterol.in.Small.HDL / Phospholipids.in.IDL	.	.	.	9.56998	Phospholipids to total lipids ratio in very large VLDL	14.3593	Concentration.of.HDL.Particles / Total.Concentration.of.Lipoprotein.Particles	4.54448	0
1:54872512:.:.	404	57	.	lead SNP not available	FALSE	FALSE	FALSE	FALSE	FALSE	FALSE	FALSE	FALSE	.	not annotated	.	rs2	1	54872512	.	.	.	.	47.6478	TRUE	LDL	.	.	.	.	.	.	.	.	.	.	.	.	.	.	.	.	.	.	.	.	.	.	.	.
8:126482077:A:G	405	1264	RP11-136O12.2	r2 = 1 with rs2954021	FALSE	FALSE	FALSE	FALSE	FALSE	FALSE	FALSE	FALSE	.	not annotated	0.493452	rs2954021	8	126482077	G	A	0	rs2954021	47.633	TRUE	nonHDL	132.091	TRUE	Total.Cholesterol.Minus.HDL.C	231.717	TRUE	Triglycerides.in.IDL	.	.	.	231.717	TRUE	Triglycerides.in.IDL	273.671	TRUE	Citrate / Triglycerides.in.LDL	.	.	.	143.442	Cholesteryl esters to total lipids ratio in medium HDL	175.473	Cholesteryl.Esters.in.Medium.HDL / Concentration.of.Medium.HDL.Particles	99.6254	0
7:25991826:T:C	406	1060	MIR148A-AC004520.1,CTD-2227E11.1,MIR148A	primary	TRUE	TRUE	TRUE	TRUE	TRUE	TRUE	TRUE	TRUE	MIR148	posttranscriptional inhibitor of LDLR and ABCA1	0.841935	rs4722551	7	25991826	C	T	3	rs4722551+rs3812316+rs35753501+rs4731702	47.6055	TRUE	logTG	19.6407	TRUE	Total.Triglycerides	28.558	TRUE	Free.Cholesterol.in.Chylomicrons.and.Extremely.Large.VLDL	4.12336	TRUE	0.87	45.9105	TRUE	Triglycerides to total lipids ratio in small VLDL	57.1373	TRUE	Total.Fatty.Acids / Total.Free.Cholesterol	15.2648	TRUE	0.97	42.0195	Free cholesterol to total lipids ratio in small VLDL	50.2752	Total.Fatty.Acids / Total.Free.Cholesterol	8.91728	17.3526
2:27730940:T:C	407	338	.	duplicate model	FALSE	FALSE	FALSE	FALSE	FALSE	FALSE	FALSE	FALSE	.	not annotated	.	rs1260326	2	27730940	C	T	.	.	47.5658	TRUE	logTG	.	.	.	.	.	.	.	.	.	.	.	.	.	.	.	.	.	.	.	.	.	.	.	.
2:27730940:T:C	408	348	.	duplicate model	FALSE	FALSE	FALSE	FALSE	FALSE	FALSE	FALSE	FALSE	.	not annotated	.	rs1260326	2	27730940	C	T	.	.	47.4268	TRUE	logTG	.	.	.	.	.	.	.	.	.	.	.	.	.	.	.	.	.	.	.	.	.	.	.	.
15:58723675:C:T	409	1922	RP11-355N15.1,LIPC,ALDH1A2	r2 = 0.978 with rs1077835	FALSE	FALSE	FALSE	FALSE	FALSE	FALSE	FALSE	FALSE	.	not annotated	0.784016	rs1800588	15	58723675	T	C	0	rs1800588	47.3793	TRUE	HDL	283.812	TRUE	HDL.Cholesterol	1898.58	TRUE	Triglycerides.in.Large.HDL	.	.	.	1898.58	TRUE	Triglycerides.in.Large.HDL	2418.82	TRUE	Free.Cholesterol.in.Small.HDL / Concentration.of.Small.HDL.Particles	.	.	.	1377.98	Free cholesterol to total lipids ratio in small HDL	2293.25	Free.Cholesterol.in.Small.HDL / Concentration.of.Small.HDL.Particles	1614.77	0
10:113940329:T:C	410	1456	.	duplicate model	FALSE	FALSE	FALSE	FALSE	FALSE	FALSE	FALSE	FALSE	.	not annotated	.	rs2792751	10	113940329	C	T	.	.	47.3633	TRUE	TC	.	.	.	.	.	.	.	.	.	.	.	.	.	.	.	.	.	.	.	.	.	.	.	.
2:121306440:G:A	411	432	AC073257.2,AC073257.1,AC073257.2-AC073257.1	primary	TRUE	TRUE	FALSE	TRUE	TRUE	TRUE	TRUE	FALSE	.	.	0.588749	rs17050272	2	121306440	A	G	4	rs17050272+rs934197+rs4299376+rs1260326+rs150474434	47.3335	TRUE	LDL	7.97298	FALSE	Clinical.LDL.Cholesterol	12.9216	TRUE	Creatinine	4.617	TRUE	0.3	12.9216	TRUE	Creatinine	26.5052	TRUE	Phospholipids.in.Small.LDL / Creatinine	9.96003	TRUE	0.62	6.05917	Phospholipids to total lipids ratio in small HDL	13.5836	Phospholipids.in.Small.LDL / Creatinine	4.9486	0
19:8945880:A:G	412	2277	CTD-2529P6.4,ZNF558,MBD3L1	MAF<1%	FALSE	FALSE	FALSE	FALSE	FALSE	FALSE	FALSE	FALSE	.	not annotated	0.995801	rs555628099	19	8945880	G	A	19	rs555628099+rs483082+rs116843064+rs58542926+rs4804414+rs838133+rs58895965+rs75916629+rs7251733+rs145464906+rs141226346+rs350885+rs35502362+rs113886122+rs7256564+rs35538872+rs11672003+rs62129968+rs1966500+rs12459222	47.2007	TRUE	logTG	0.417725	FALSE	Total.Triglycerides	1.10723	FALSE	Degree.of.Unsaturation	.	.	.	1.24137	FALSE	Ratio of monounsaturated fatty acids to total fatty acids	1.65557	FALSE	Triglycerides.in.Very.Large.HDL / Omega.3.Fatty.Acids	.	.	.	0.807685	Ratio of polyunsaturated fatty acids to total fatty acids	0.901477	Triglycerides.in.Very.Large.HDL / Omega.3.Fatty.Acids	0.689505	0.134135
4:73491622:G:A	413	644	.	duplicate model	FALSE	FALSE	FALSE	FALSE	FALSE	FALSE	FALSE	FALSE	.	not annotated	.	rs537526354	4	73491622	A	G	.	.	47.0851	TRUE	nonHDL	.	.	.	.	.	.	.	.	.	.	.	.	.	.	.	.	.	.	.	.	.	.	.	.
18:46545976:G:C	414	2220	RP11-15F12.1,RP11-1058N17.1-RP11-15F12.1	r2 = 1 with rs538969346	FALSE	FALSE	FALSE	FALSE	FALSE	FALSE	FALSE	FALSE	.	not annotated	0.990503	rs538969346	18	46545976	C	G	3	rs538969346+rs77960347+rs12963741+rs11081591	46.9508	TRUE	nonHDL	0.814194	FALSE	Total.Cholesterol.Minus.HDL.C	1.13095	FALSE	Average.Diameter.for.LDL.Particles	.	.	.	1.78138	FALSE	Free cholesterol to total lipids ratio in chylomicrons and extremely large VLDL	2.62209	FALSE	Omega.6.Fatty.Acids / Total.Lipids.in.Lipoprotein.Particles	.	.	.	0.999951	Free cholesterol to total lipids ratio in chylomicrons and extremely large VLDL	1.60881	Omega.6.Fatty.Acids / Total.Lipids.in.Lipoprotein.Particles	0.316761	0.650427
19:45411941:T:C	415	2391	.	duplicate model	FALSE	FALSE	FALSE	FALSE	FALSE	FALSE	FALSE	FALSE	.	not annotated	.	rs429358	19	45411941	C	T	.	.	46.9289	TRUE	HDL	.	.	.	.	.	.	.	.	.	.	.	.	.	.	.	.	.	.	.	.	.	.	.	.
3:58420613:A:G	416	530	PDHB-RP11-359I18.5,PDHB	r2 = 0.999 with rs9844432	FALSE	FALSE	FALSE	FALSE	FALSE	FALSE	FALSE	FALSE	.	not annotated	0.91755	rs71311871	3	58420613	G	A	1	rs71311871+rs13076933	46.9136	TRUE	LDL	12.8144	TRUE	Clinical.LDL.Cholesterol	16.4549	TRUE	Cholesteryl.Esters.in.Medium.VLDL	.	.	.	16.4549	TRUE	Cholesteryl.Esters.in.Medium.VLDL	18.0272	TRUE	Free.Cholesterol.in.Small.HDL / Total.Cholesterol	.	.	.	8.21849	Phospholipids to total lipids ratio in very large VLDL	11.725	Triglycerides.in.Small.HDL / Phospholipids.in.VLDL	3.64054	0
4:75416194:T:C	417	654	AREG-AC142293.3,AC142293.3	r2 = 1 with rs189087436	FALSE	FALSE	FALSE	FALSE	FALSE	FALSE	FALSE	FALSE	.	not annotated	0.99985	rs189087436	4	75416194	C	T	6	rs189087436+rs573930512+rs537526354+rs4860987+rs13108218+rs938075289+rs13107325	46.9136	TRUE	TC	0.0385114	FALSE	Total.Cholesterol	1.43852	FALSE	Glycine	.	.	.	1.84072	FALSE	Cholesterol to total lipids ratio in small LDL	2.91283	FALSE	Concentration.of.Medium.LDL.Particles / Concentration.of.Very.Small.VLDL.Particles	.	.	.	1.49979	Cholesterol to total lipids ratio in small LDL	2.40175	Concentration.of.Medium.LDL.Particles / Concentration.of.Very.Small.VLDL.Particles	1.40001	0.402205
6:139835498:T:C	418	988	RP11-12A2.3-ATP5F1P6	r2 = 0.852 with rs2982521	FALSE	FALSE	FALSE	FALSE	FALSE	FALSE	FALSE	FALSE	.	not annotated	0.408921	rs17585887	6	139835498	C	T	3	rs17585887+rs41272086+rs998584+rs2263329	46.8097	TRUE	HDL	11.3395	TRUE	HDL.Cholesterol	31.2292	TRUE	Phospholipids.in.Very.Large.VLDL	.	.	.	31.9368	TRUE	Triglycerides to total lipids ratio in small HDL	35.6664	TRUE	Linoleic.Acid / Total.Lipids.in.VLDL	.	.	.	22.973	Free cholesterol to total lipids ratio in large LDL	27.3617	Free.Cholesterol.in.Large.LDL / LDL.Cholesterol	19.8897	0.707654
12:111884608:T:C	419	1743	SH2B3	r2 = 0.992 with rs597808	FALSE	FALSE	FALSE	FALSE	FALSE	FALSE	FALSE	FALSE	.	not annotated	0.48223	rs3184504	12	111884608	C	T	5	rs3184504+rs61941677+rs7133378+rs2338104+rs12366872+rs73119306	46.7773	TRUE	HDL	17.641	TRUE	HDL.Cholesterol	46.8425	TRUE	Lactate	.	.	.	46.8425	TRUE	Lactate	78.2288	TRUE	Lactate / Total.Esterified.Cholesterol	.	.	.	9.14785	Phospholipids to total lipids ratio in small VLDL	31.3863	Lactate / Total.Esterified.Cholesterol	29.2015	0
5:74639544:CTTGTA:C	420	746	.	duplicate model	FALSE	FALSE	FALSE	FALSE	FALSE	FALSE	FALSE	FALSE	.	not annotated	.	rs10590407	5	74639544	C	CTTGTA	.	.	46.6947	TRUE	nonHDL	.	.	.	.	.	.	.	.	.	.	.	.	.	.	.	.	.	.	.	.	.	.	.	.
2:62988169:G:T	421	390	EHBP1	r2 = 1 with rs4671050	FALSE	FALSE	FALSE	FALSE	FALSE	FALSE	FALSE	FALSE	.	not annotated	0.687437	rs4671050	2	62988169	T	G	6	rs4671050+rs934197+rs4299376+rs1260326+rs150474434+rs17050272+rs10184673	46.6737	TRUE	LDL	14.4077	TRUE	Clinical.LDL.Cholesterol	20.9194	TRUE	Cholesteryl.Esters.in.Medium.VLDL	.	.	.	20.9194	TRUE	Cholesteryl.Esters.in.Medium.VLDL	23.2232	TRUE	Cholesteryl.Esters.in.Small.HDL / Cholesteryl.Esters.in.Medium.VLDL	.	.	.	9.83564	Phospholipids to total lipids ratio in very large VLDL	16.3452	Concentration.of.HDL.Particles / Total.Concentration.of.Lipoprotein.Particles	6.51178	0
20:34160840:G:A	422	2488	FER1L4	r2 = 1 with rs7261820	FALSE	FALSE	FALSE	FALSE	FALSE	FALSE	FALSE	FALSE	.	not annotated	0.862944	rs7261820	20	34160840	A	G	3	rs7261820+rs1883711+rs2618566+rs6029549	46.5376	TRUE	LDL	12.6512	TRUE	Clinical.LDL.Cholesterol	18.4918	TRUE	Total.Free.Cholesterol	.	.	.	18.4918	TRUE	Total.Free.Cholesterol	22.4762	TRUE	Albumin / Polyunsaturated.Fatty.Acids	.	.	.	3.04108	Free cholesterol to total lipids ratio in large HDL	6.02475	Cholesteryl.Esters.in.Medium.HDL / Cholesterol.in.Medium.HDL	5.84061	0
12:9082581:A:G	423	1654	PHC1	r2 = 1 with rs4883201	FALSE	FALSE	FALSE	FALSE	FALSE	FALSE	FALSE	FALSE	.	not annotated	0.898238	rs4883201	12	9082581	G	A	2	rs4883201+rs1169288+rs3184504	46.5171	TRUE	TC	8.38671	TRUE	Total.Cholesterol	8.39119	FALSE	Total.Esterified.Cholesterol	.	.	.	8.39119	FALSE	Total.Esterified.Cholesterol	11.3853	FALSE	Albumin / Total.Esterified.Cholesterol	.	.	.	4.50151	Phospholipids to total lipids ratio in large HDL	6.33321	Triglycerides.in.Small.HDL / Triglycerides.in.Small.LDL	0.004473	0
10:17259772:C:T	424	1395	VIM-AS1	primary	TRUE	TRUE	TRUE	TRUE	TRUE	FALSE	FALSE	FALSE	.	.	0.586023	rs7903402	10	17259772	T	C	1	rs7903402+rs2792751	46.342	TRUE	TC	8.67057	TRUE	Total.Cholesterol	12.2553	TRUE	Linoleic.Acid	0.548521	FALSE	0.13	12.2553	TRUE	Linoleic.Acid	18.8602	TRUE	Triglycerides.in.Small.HDL / Triglycerides.in.Small.LDL	0.847661	FALSE	0.3	3.53159	Free cholesterol to total lipids ratio in small HDL	10.4724	Triglycerides.in.Small.HDL / Total.Triglycerides	3.58475	0
10:124693587:G:T	425	1475	C10orf88	r2 = 0.998 with rs9423289	FALSE	FALSE	FALSE	FALSE	FALSE	FALSE	FALSE	FALSE	.	not annotated	0.424254	rs7904973	10	124693587	T	G	2	rs7904973+rs2792751+rs7903402	45.9626	TRUE	TC	11.3287	TRUE	Total.Cholesterol	15.287	TRUE	Cholesteryl.Esters.in.Medium.VLDL	.	.	.	15.287	TRUE	Cholesteryl.Esters.in.Medium.VLDL	20.7076	TRUE	Phospholipids.in.IDL / Albumin	.	.	.	6.59171	Triglycerides to total lipids ratio in very large VLDL	9.25785	Triglycerides.in.Small.HDL / Phospholipids.in.VLDL	3.95828	0
10:124693587:G:T	426	1474	C10orf88	r2 = 0.998 with rs9423289	FALSE	FALSE	FALSE	FALSE	FALSE	FALSE	FALSE	FALSE	.	not annotated	0.424254	rs7904973	10	124693587	T	G	1	rs7904973+rs2792751	45.8125	TRUE	LDL	12.36	TRUE	Clinical.LDL.Cholesterol	15.2685	TRUE	Cholesteryl.Esters.in.Medium.VLDL	.	.	.	15.2685	TRUE	Cholesteryl.Esters.in.Medium.VLDL	20.682	TRUE	Phospholipids.in.IDL / Albumin	.	.	.	6.59789	Triglycerides to total lipids ratio in very large VLDL	9.2424	Triglycerides.in.Small.HDL / Phospholipids.in.VLDL	2.90854	0
3:50668547:C:T	427	523	MAPKAPK3	primary	TRUE	TRUE	FALSE	FALSE	FALSE	FALSE	FALSE	FALSE	.	not annotated	0.98343	rs41308269	3	50668547	T	C	20	rs41308269+rs13076933+rs9844432+rs77682405+rs9837622+rs3732359+rs6792725+rs4679881+rs9832727+rs68028452+rs55921103+rs11920311+rs10513801+rs2011442+rs11708067+rs7642634+rs11711206+rs76440173+rs146948889+rs9862203+rs6794370	45.684	TRUE	TC	0.160684	FALSE	Total.Cholesterol	1.3955	FALSE	Alanine	.	.	.	1.3955	FALSE	Alanine	2.42905	FALSE	Alanine / Omega.3.Fatty.Acids	.	.	.	0.697794	Cholesteryl esters to total lipids ratio in chylomicrons and extremely large VLDL	1.84813	Phosphatidylcholines / Phosphoglycerides	1.23482	0
17:64224775:C:T	428	2164	APOH	r2 = 0.998 with rs1801689	FALSE	FALSE	FALSE	FALSE	FALSE	FALSE	FALSE	FALSE	.	not annotated	0.970391	rs8178824	17	64224775	T	C	4	rs8178824+rs77542162+rs186021206+rs11869730+rs11657987	45.6757	TRUE	TC	10.9075	TRUE	Total.Cholesterol	62.8314	TRUE	Average.Diameter.for.VLDL.Particles	.	.	.	88.9514	TRUE	Cholesteryl esters to total lipids ratio in large VLDL	107.9	TRUE	Triglycerides.in.Large.LDL / Monounsaturated.Fatty.Acids	.	.	.	68.5232	Phospholipids to total lipids ratio in medium VLDL	97.4746	Triglycerides.in.Large.LDL / Monounsaturated.Fatty.Acids	51.924	26.12
3:156797648:C:T	429	582	LEKR1-LINC00880,LINC00880,RP11-6F2.5	primary	TRUE	TRUE	TRUE	TRUE	TRUE	TRUE	TRUE	FALSE	.	.	0.612892	rs10049088	3	156797648	T	C	2	rs10049088+rs7634917+rs1154988	45.6576	TRUE	HDL	11.1768	TRUE	HDL.Cholesterol	13.4781	TRUE	Cholesteryl.Esters.in.Medium.HDL	0.608375	FALSE	0.32	14.0862	TRUE	Triglycerides to total lipids ratio in small HDL	21.1514	TRUE	Concentration.of.LDL.Particles / Phospholipids.in.LDL	2.66455	FALSE	0.5	9.04161	Cholesteryl esters to total lipids ratio in IDL	20.1507	Concentration.of.LDL.Particles / Phospholipids.in.LDL	2.30127	0.608104
19:45418790:T:C	430	2413	APOC1	primary	TRUE	TRUE	TRUE	TRUE	TRUE	TRUE	TRUE	TRUE	APOC1	Apolipoprotein C1	0.76289	rs5117	19	45418790	C	T	0	rs5117	45.6071	TRUE	logTG	59.9913	TRUE	Total.Triglycerides	256.986	TRUE	Free.Cholesterol.in.Small.LDL	55.7603	TRUE	1	490.119	TRUE	Cholesteryl esters to total lipids ratio in IDL	566.686	TRUE	Cholesteryl.Esters.in.IDL / Total.Cholesterol	111.559	TRUE	1	285.058	Cholesterol to total lipids ratio in very small VLDL	338.904	Cholesteryl.Esters.in.Small.VLDL / Cholesterol.in.Small.VLDL	196.995	233.133
22:21917479:C:T	431	2572	UBE2L3	primary	TRUE	TRUE	TRUE	TRUE	TRUE	TRUE	TRUE	FALSE	.	.	0.810158	rs5998509	22	21917479	T	C	1	rs5998509+rs738409	45.5114	TRUE	TC	10.4369	TRUE	Total.Cholesterol	26.8841	TRUE	Phospholipids.in.Medium.HDL	8.65022	TRUE	0.77	26.8841	TRUE	Phospholipids.in.Medium.HDL	27.4226	TRUE	Phospholipids.in.Medium.HDL / Average.Diameter.for.HDL.Particles	8.34158	TRUE	0.79	11.7297	Cholesteryl esters to total lipids ratio in large LDL	16.1922	Total.Lipids.in.LDL / Cholesteryl.Esters.in.LDL	16.4472	0
12:20470221:A:C	432	1660	CTC-465D4.1-RP11-284H19.1	r2 = 0.997 with rs11045171	FALSE	FALSE	FALSE	FALSE	FALSE	FALSE	FALSE	FALSE	.	not annotated	0.803138	rs11045172	12	20470221	C	A	6	rs11045172+rs61941677+rs7133378+rs2338104+rs12366872+rs73119306+rs3184504	45.4609	TRUE	HDL	20.2459	TRUE	HDL.Cholesterol	21.2187	TRUE	Cholesteryl.Esters.in.HDL	.	.	.	21.2187	TRUE	Cholesteryl.Esters.in.HDL	25.1461	TRUE	Free.Cholesterol.in.Small.HDL / Total.Concentration.of.Lipoprotein.Particles	.	.	.	11.7588	Free cholesterol to total lipids ratio in large LDL	17.8992	Concentration.of.Small.LDL.Particles / Total.Cholesterol	0.97283	0
6:127454893:G:A	433	966	RSPO3	primary	TRUE	TRUE	TRUE	TRUE	TRUE	TRUE	FALSE	FALSE	.	.	0.950288	rs72959041	6	127454893	A	G	4	rs72959041+rs41272086+rs998584+rs2263329+rs17585887	45.4067	TRUE	HDL	14.7931	TRUE	HDL.Cholesterol	24.4928	TRUE	Phospholipids.in.Large.VLDL	5.00403	TRUE	0.69	25.9261	TRUE	Inverse Ratio of triglycerides to phosphoglycerides	38.3842	TRUE	Triglycerides.in.Small.LDL / Monounsaturated.Fatty.Acids	3.95943	FALSE	0.98	17.376	Free cholesterol to total lipids ratio in large LDL	26.6598	Free.Cholesterol.in.Small.HDL / Total.Concentration.of.Lipoprotein.Particles	9.6997	1.43336
6:161588372:C:T	434	1021	AGPAT4	primary	TRUE	TRUE	FALSE	FALSE	FALSE	FALSE	FALSE	FALSE	.	not annotated	0.964693	rs147829643	6	161588372	T	C	19	rs147829643+rs41272086+rs998584+rs2263329+rs17585887+rs72959041+rs76716928+rs9296406+rs11759230+rs142449754+rs1338668+rs17209803+rs672341+rs115675705+rs78425119+rs2608629+rs6924387+rs115003989+rs2750415+rs9347737	45.3242	TRUE	HDL	0.0249788	FALSE	HDL.Cholesterol	2.22908	FALSE	Triglycerides.in.Chylomicrons.and.Extremely.Large.VLDL	.	.	.	2.22908	FALSE	Triglycerides.in.Chylomicrons.and.Extremely.Large.VLDL	3.68306	FALSE	Free.Cholesterol.in.Very.Large.VLDL / Total.Lipids.in.Chylomicrons.and.Extremely.Large.VLDL	.	.	.	1.5768	Cholesteryl esters to total lipids ratio in small LDL	2.23904	Phospholipids.in.Large.VLDL / Concentration.of.Very.Large.VLDL.Particles	2.2041	0
4:110638824:C:T	435	696	PLA2G12A	r2 = 1 with rs114816312	FALSE	FALSE	FALSE	FALSE	FALSE	FALSE	FALSE	FALSE	.	not annotated	0.99212	rs114816312	4	110638824	T	C	2	rs114816312+rs13108218+rs17605615	45.3152	TRUE	logTG	13.1201	TRUE	Total.Triglycerides	25.2089	TRUE	Phospholipids.in.Very.Small.VLDL	.	.	.	34.6554	TRUE	Phospholipids to total lipids ratio in medium HDL	61.1859	TRUE	Total.Lipids.in.Medium.LDL / Cholesteryl.Esters.in.VLDL	.	.	.	27.0905	Phospholipids to total lipids ratio in medium HDL	50.2863	Apolipoprotein.B / Phospholipids.in.LDL	12.0888	9.44654
13:114551993:T:C	436	1832	.	duplicate model	FALSE	FALSE	FALSE	FALSE	FALSE	FALSE	FALSE	FALSE	.	not annotated	.	rs6602909	13	114551993	C	T	.	.	45.1763	TRUE	logTG	.	.	.	.	.	.	.	.	.	.	.	.	.	.	.	.	.	.	.	.	.	.	.	.
3:185824004:T:C	437	593	DGKG,ETV5	r2 = 0.999 with rs10513801	FALSE	FALSE	FALSE	FALSE	FALSE	FALSE	FALSE	FALSE	.	not annotated	0.135728	rs1516725	3	185824004	C	T	3	rs1516725+rs7634917+rs1154988+rs10049088	45.0386	TRUE	HDL	16.2592	TRUE	HDL.Cholesterol	18.0991	TRUE	Concentration.of.Large.HDL.Particles	.	.	.	19.725	TRUE	Free cholesterol to total lipids ratio in medium HDL	32.1399	TRUE	Triglycerides.in.Small.HDL / Triglycerides.in.Small.LDL	.	.	.	12.007	Phospholipids to total lipids ratio in large LDL	28.925	Triglycerides.in.Small.HDL / Triglycerides.in.Small.LDL	1.83993	1.62585
1:110326545:G:A	438	164	GSTM5-NDUFA5P10	r2 = 1 with rs140266316	FALSE	FALSE	FALSE	FALSE	FALSE	FALSE	FALSE	FALSE	.	not annotated	0.987158	rs140266316	1	110326545	A	G	23	rs140266316+rs12740374+rs11591147+rs10889333+rs556107+rs114165349+rs557402933+rs9438905+rs186538116+rs2642438+rs2031494+rs10779835+rs191875604+rs41309280+rs1497406+rs7551124+rs267733+rs1689801+rs41311276+rs185619953+rs574313788+rs140559632+rs72929847+rs165316	44.983	TRUE	nonHDL	0.730419	FALSE	Total.Cholesterol.Minus.HDL.C	2.67847	FALSE	Citrate	.	.	.	2.67847	FALSE	Citrate	3.96922	FALSE	Citrate / Omega.3.Fatty.Acids	.	.	.	1.71606	Free cholesterol to total lipids ratio in large HDL	1.92693	Cholesteryl.Esters.in.Medium.HDL / HDL.Cholesterol	1.94805	0
16:56987369:T:C	439	1979	HERPUD1-AC012181.1,AC012181.1	r2 = 0.988 with rs821840	FALSE	FALSE	FALSE	FALSE	FALSE	FALSE	FALSE	FALSE	.	not annotated	0.675607	rs56156922	16	56987369	C	T	1	rs56156922+rs77303550	44.9666	TRUE	TC	38.3973	TRUE	Total.Cholesterol	1316.1	TRUE	Cholesteryl.Esters.in.Large.HDL	.	.	.	1316.1	TRUE	Cholesteryl.Esters.in.Large.HDL	1839.62	TRUE	Cholesteryl.Esters.in.Small.VLDL / Phospholipids.in.Small.VLDL	.	.	.	917.987	Triglycerides to total lipids ratio in large VLDL	1417.06	Cholesteryl.Esters.in.Small.VLDL / Phospholipids.in.Small.VLDL	1277.7	0
8:19820916:C:T	440	1191	LPL	r2 = 0.999 with rs328	FALSE	FALSE	FALSE	FALSE	FALSE	FALSE	FALSE	FALSE	.	not annotated	0.899198	rs117199990	8	19820916	T	C	0	rs117199990	44.8948	TRUE	HDL	286.364	TRUE	HDL.Cholesterol	454.859	TRUE	Triglycerides.in.Small.VLDL	.	.	.	527.425	TRUE	Triglycerides to total lipids ratio in small HDL	629.857	TRUE	Triglycerides.in.Small.VLDL / Saturated.Fatty.Acids	.	.	.	387.975	Free cholesterol to total lipids ratio in medium LDL	500.459	Cholesterol.in.IDL / Remnant.Cholesterol..Non.HDL..Non.LDL..Cholesterol.	168.495	72.5655
19:46385438:A:C	441	2419	FOXA3-IRF2BP1,IRF2BP1	primary	TRUE	TRUE	TRUE	TRUE	TRUE	FALSE	FALSE	FALSE	.	.	0.881055	rs34514836	19	46385438	C	A	4	rs34514836+rs429358+rs116843064+rs367070+rs56322906	44.7799	TRUE	HDL	8.2215	TRUE	HDL.Cholesterol	12.6253	TRUE	Total.Esterified.Cholesterol	4.17584	TRUE	0.11	12.6253	TRUE	Total.Esterified.Cholesterol	14.5877	TRUE	Average.Diameter.for.VLDL.Particles / Total.Esterified.Cholesterol	5.15896	TRUE	0.23	9.05791	Cholesteryl esters to total lipids ratio in large VLDL	11.0352	Free.Cholesterol.in.Large.VLDL / Cholesterol.in.Large.VLDL	4.40381	0
8:19859539:G:A	442	1201	LPL-AC100802.3	r2 = 0.955 with rs15285	FALSE	FALSE	FALSE	FALSE	FALSE	FALSE	FALSE	FALSE	.	not annotated	0.713349	rs2119690	8	19859539	A	G	0	rs2119690	44.6899	TRUE	logTG	272.965	TRUE	Total.Triglycerides	328.868	TRUE	Triglycerides.in.Small.VLDL	.	.	.	437.098	TRUE	Triglycerides to total lipids ratio in small HDL	490.909	TRUE	Triglycerides.in.Small.VLDL / Saturated.Fatty.Acids	.	.	.	281.666	Free cholesterol to total lipids ratio in large LDL	400.599	Cholesterol.in.IDL / Remnant.Cholesterol..Non.HDL..Non.LDL..Cholesterol.	55.9029	108.231
8:55437524:A:G	443	1218	RP11-53M11.2-RP11-53M11.3,RP11-53M11.2	r2 = 1 with rs9298506	FALSE	FALSE	FALSE	FALSE	FALSE	FALSE	FALSE	FALSE	.	not annotated	0.789509	rs9298506	8	55437524	G	A	5	rs9298506+rs28601761+rs9987289+rs9297994+rs2737245+rs11787335	44.6819	TRUE	LDL	9.738	TRUE	Clinical.LDL.Cholesterol	13.0103	TRUE	Concentration.of.Large.LDL.Particles	.	.	.	13.0103	TRUE	Concentration.of.Large.LDL.Particles	13.5992	TRUE	Concentration.of.Large.LDL.Particles / Albumin	.	.	.	2.35381	Triglycerides to total lipids ratio in chylomicrons and extremely large VLDL	5.07922	Total.Lipids.in.Chylomicrons.and.Extremely.Large.VLDL / Concentration.of.Chylomicrons.and.Extremely.Large.VLDL.Particles	3.2723	0
7:44197583:G:T	444	1076	GCK	primary	TRUE	TRUE	TRUE	TRUE	TRUE	FALSE	FALSE	FALSE	.	.	0.863841	rs2070971	7	44197583	T	G	4	rs2070971+rs3812316+rs35753501+rs4731702+rs4722551	44.6737	TRUE	logTG	11.7707	TRUE	Total.Triglycerides	13.0554	TRUE	Triglycerides.in.Medium.LDL	2.97478	FALSE	0.25	13.0554	TRUE	Triglycerides.in.Medium.LDL	17.8577	TRUE	Triglycerides.in.Medium.LDL / Histidine	2.3715	FALSE	0.52	7.11491	Free cholesterol to total lipids ratio in large LDL	9.46483	Concentration.of.Medium.HDL.Particles / Cholesteryl.Esters.in.HDL	1.2847	0
2:21267461:G:A	445	292	.	duplicate model	FALSE	FALSE	FALSE	FALSE	FALSE	FALSE	FALSE	FALSE	.	not annotated	.	rs934197	2	21267461	A	G	.	.	44.6314	TRUE	LDL	.	.	.	.	.	.	.	.	.	.	.	.	.	.	.	.	.	.	.	.	.	.	.	.
6:25314597:A:G	446	839	LRRC16A	primary	TRUE	TRUE	FALSE	FALSE	FALSE	FALSE	FALSE	FALSE	.	not annotated	0.927505	rs181058325	6	25314597	G	A	29	rs181058325+rs10455872+rs6689+rs78425119+rs2235215+rs80215559+rs998584+rs9402685+rs17789218+rs1265097+rs2982521+rs141783576+rs3128759+rs1544155+rs148349043+rs6458949+rs72974722+rs9378220+rs6913325+rs6917150+rs1415700+rs3800461+rs1871859+rs913499+rs35657082+rs2327488+rs9471975+rs2104226+rs3118362+rs9368188	44.6308	TRUE	nonHDL	0.841668	FALSE	Total.Cholesterol.Minus.HDL.C	1.64248	FALSE	Free.Cholesterol.in.Very.Small.VLDL	.	.	.	1.90275	FALSE	Phospholipids to total lipids ratio in very large VLDL	2.39288	FALSE	Triglycerides.in.Large.VLDL / Free.Cholesterol.in.Very.Large.VLDL	.	.	.	1.4858	Triglycerides to total lipids ratio in large VLDL	1.73085	Triglycerides.in.Large.VLDL / Free.Cholesterol.in.Very.Large.VLDL	0.800815	0.260265
17:42626279:G:A	447	2137	GPATCH8-FZD2	MAF<1%	FALSE	FALSE	FALSE	FALSE	FALSE	FALSE	FALSE	FALSE	.	not annotated	0.995837	rs72824773	17	42626279	A	G	21	rs72824773+rs72836561+rs79202680+rs11656743+rs7212201+rs1801689+rs28394864+rs571475342+rs9905032+rs11078597+rs1292072+rs77542162+rs200489612+rs650558+rs10775406+rs186398347+rs704+rs193220+rs62078746+rs7207542+rs717118+rs11870735	44.5751	TRUE	logTG	0.101661	FALSE	Total.Triglycerides	1.93786	FALSE	Alanine	.	.	.	1.93786	FALSE	Alanine	2.86377	FALSE	Cholesteryl.Esters.in.Small.HDL / Alanine	.	.	.	1.02145	Cholesteryl esters to total lipids ratio in very large HDL	1.46279	Total.Lipids.in.Large.HDL / Phospholipids.in.Very.Large.HDL	1.8362	0
12:112110489:T:C	448	1748	BRAP,PCNPP1	MAF<1%	FALSE	FALSE	FALSE	FALSE	FALSE	FALSE	FALSE	FALSE	.	not annotated	0.999993	rs3782886	12	112110489	C	T	0	rs3782886	44.3485	TRUE	HDL	0.537244	FALSE	HDL.Cholesterol	2.19806	FALSE	Pyruvate	.	.	.	2.19806	FALSE	Pyruvate	2.40958	FALSE	Pyruvate / Glucose	.	.	.	0.766066	Cholesteryl esters to total lipids ratio in large LDL	1.04888	Cholesteryl.Esters.in.Large.LDL / Total.Lipids.in.LDL	1.66081	0
1:27021913:G:C	449	24	ARID1A,RP5-968P14.2-ARID1A,RP5-968P14.2	r2 = 1 with rs114165349	FALSE	FALSE	FALSE	FALSE	FALSE	FALSE	FALSE	FALSE	.	not annotated	0.976728	rs114165349	1	27021913	C	G	2	rs114165349+rs10889333+rs2281721	44.3089	TRUE	logTG	27.1193	TRUE	Total.Triglycerides	33.6908	TRUE	Concentration.of.Small.VLDL.Particles	.	.	.	35.4643	TRUE	Inverse Ratio of apolipoprotein B to apolipoprotein A1	54.3246	TRUE	Phospholipids.in.Medium.HDL / Triglycerides.in.Medium.LDL	.	.	.	12.3812	Inverse Ratio of apolipoprotein B to apolipoprotein A1	34.3762	Phospholipids.in.Medium.HDL / Saturated.Fatty.Acids	6.57151	1.77354
12:123885484:A:G	450	1773	SETD8	r2 = 0.996 with rs12366872	FALSE	FALSE	FALSE	FALSE	FALSE	FALSE	FALSE	FALSE	.	not annotated	0.0923321	rs28866344	12	123885484	G	A	3	rs28866344+rs1169288+rs3184504+rs4883201	44.3089	TRUE	TC	7.04915	FALSE	Total.Cholesterol	14.1475	TRUE	Apolipoprotein.A1	.	.	.	14.1475	TRUE	Apolipoprotein.A1	21.6991	TRUE	Triglycerides.in.Large.HDL / Triglycerides.in.IDL	.	.	.	2.67896	Free cholesterol to total lipids ratio in very large HDL	14.0626	Triglycerides.in.Small.HDL / Triglycerides.in.HDL	7.09835	0
7:25991826:T:C	451	1062	.	duplicate model	FALSE	FALSE	FALSE	FALSE	FALSE	FALSE	FALSE	FALSE	.	not annotated	.	rs4722551	7	25991826	C	T	.	.	44.2487	TRUE	TC	.	.	.	.	.	.	.	.	.	.	.	.	.	.	.	.	.	.	.	.	.	.	.	.
1:92971828:T:A	452	130	EVI5,GFI1-EVI5	primary	TRUE	TRUE	FALSE	FALSE	TRUE	FALSE	FALSE	FALSE	.	.	0.206702	rs4970705	1	92971828	A	T	8	rs4970705+rs12740374+rs11591147+rs11207980+rs2587534+rs35148262+rs2642438+rs557402933+rs186538116	44.1669	TRUE	TC	4.84767	FALSE	Total.Cholesterol	7.95875	FALSE	Phospholipids.in.Very.Small.VLDL	.	.	.	8.83046	FALSE	Free cholesterol to total lipids ratio in small HDL	12.062	TRUE	Phospholipids.in.Small.HDL / Total.Phospholipids.in.Lipoprotein.Particles	1.67833	FALSE	0.07	7.95105	Free cholesterol to total lipids ratio in small HDL	8.99179	Phospholipids.in.Small.HDL / Total.Phospholipids.in.Lipoprotein.Particles	3.11107	0.871707
4:103188709:C:T	453	687	SLC39A8	r2 = 1 with rs13107325	FALSE	FALSE	FALSE	FALSE	FALSE	FALSE	FALSE	FALSE	.	not annotated	0.925684	rs13107325	4	103188709	T	C	5	rs13107325+rs573930512+rs537526354+rs4860987+rs13108218+rs938075289	43.8327	TRUE	TC	18.5295	TRUE	Total.Cholesterol	43.3058	TRUE	Free.Cholesterol.in.HDL	.	.	.	45.9877	TRUE	Free cholesterol to total lipids ratio in medium HDL	45.9877	TRUE	Free.Cholesterol.in.Medium.HDL / Total.Lipids.in.Medium.HDL	.	.	.	26.348	Phospholipids to total lipids ratio in very small VLDL	40.8297	Saturated.Fatty.Acids / Triglycerides.in.LDL	24.7763	2.68191
8:8317817:A:C	454	1142	CTA-398F10.2	primary	TRUE	TRUE	FALSE	TRUE	TRUE	TRUE	TRUE	FALSE	.	.	0.544337	rs2921060	8	8317817	C	A	7	rs2921060+rs328+rs28601761+rs35246381+rs7821812+rs2081687+rs4320509+rs17149279	43.8182	TRUE	logTG	6.93945	FALSE	Total.Triglycerides	15.2007	TRUE	Average.Diameter.for.VLDL.Particles	2.07041	FALSE	0.98	15.33	TRUE	Phospholipids to total lipids ratio in small LDL	34.9682	TRUE	Triglycerides.in.Large.LDL / Monounsaturated.Fatty.Acids	6.07267	TRUE	0.99	13.6395	Phospholipids to total lipids ratio in small LDL	25.9129	Triglycerides.in.Large.LDL / Monounsaturated.Fatty.Acids	8.26122	0.129373
19:11723655:T:C	455	2312	.	model contains colinear SNP	FALSE	FALSE	FALSE	FALSE	FALSE	FALSE	FALSE	FALSE	.	not annotated	0.999033	rs553321524	19	11723655	C	T	20	rs553321524+rs7412+rs73015024+rs58542926+rs62116778+rs540662190+rs681343+rs150262789+rs35081008+rs12720359+rs75916629+rs76989105+rs753931089+rs1736177+rs538657595+rs56113850+rs562494568+rs142385484+rs4808766+rs560788989+rs768815028	43.7055	TRUE	LDL	0.0996439	FALSE	Clinical.LDL.Cholesterol	2.25583	FALSE	Cholesteryl.Esters.in.Medium.HDL	.	.	.	2.25583	FALSE	Cholesteryl.Esters.in.Medium.HDL	2.7987	FALSE	Free.Cholesterol.in.Medium.HDL / Triglycerides.in.Large.LDL	.	.	.	1.78011	Cholesterol to total lipids ratio in IDL	2.11371	Cholesteryl.Esters.in.IDL / Concentration.of.IDL.Particles	.	0
17:65980289:G:A	456	2171	BPTF	r2 = 0.914 with rs9915591	FALSE	FALSE	FALSE	FALSE	FALSE	FALSE	FALSE	FALSE	.	not annotated	0.204159	rs11656743	17	65980289	A	G	2	rs11656743+rs72836561+rs79202680	43.4449	TRUE	logTG	11.1864	TRUE	Total.Triglycerides	14.3695	TRUE	Triglycerides.in.Small.HDL	.	.	.	14.3695	TRUE	Triglycerides.in.Small.HDL	16.7131	TRUE	Free.Cholesterol.in.Very.Large.HDL / Phospholipids.in.Very.Small.VLDL	.	.	.	9.01703	Cholesteryl esters to total lipids ratio in medium HDL	10.6609	Phosphoglycerides / HDL.Cholesterol	3.18309	0
19:7223785:C:T	457	2264	INSR	primary	TRUE	TRUE	FALSE	FALSE	TRUE	FALSE	FALSE	TRUE	INSR	insulin receptor	0.569941	rs4804414	19	7223785	T	C	3	rs4804414+rs483082+rs116843064+rs58542926	43.4191	TRUE	logTG	7.15009	FALSE	Total.Triglycerides	9.00119	FALSE	Triglycerides.in.Very.Large.VLDL	.	.	.	9.00119	FALSE	Triglycerides.in.Very.Large.VLDL	14.2574	TRUE	Glycine / Alanine	2.06835	FALSE	0.19	6.10093	Phospholipids to total lipids ratio in medium HDL	8.45157	Phospholipids.in.Medium.LDL / Free.Cholesterol.in.LDL	1.85111	0
17:28583498:C:G	458	2112	RP11-354P11.2,BLMH	primary	TRUE	TRUE	FALSE	FALSE	FALSE	FALSE	FALSE	FALSE	.	not annotated	0.91643	rs111919672	17	28583498	G	C	23	rs111919672+rs77542162+rs186021206+rs1801689+rs12603290+rs704+rs11657987+rs75910690+rs4485425+rs12945088+rs2270445+rs2288278+rs34460487+rs56336338+rs78186330+rs9332408+rs9894946+rs72836561+rs28811342+rs9890133+rs1292061+rs12943633+rs571475342+rs2354155	43.2628	TRUE	LDL	0.043815	FALSE	Clinical.LDL.Cholesterol	1.383	FALSE	Omega.3.Fatty.Acids	.	.	.	2.41734	FALSE	Ratio of linoleic acid to total fatty acids	5.19452	FALSE	Total.Lipids.in.Very.Small.VLDL / Linoleic.Acid	.	.	.	1.48849	Ratio of saturated fatty acids to total fatty acids	3.93746	Total.Lipids.in.Very.Small.VLDL / Linoleic.Acid	1.33919	1.03434
10:115786236:G:A	459	1462	NHLRC2-ADRB1	primary	TRUE	TRUE	TRUE	TRUE	TRUE	TRUE	TRUE	FALSE	.	.	0.87272	rs72823014	10	115786236	A	G	2	rs72823014+rs2792751+rs55665473	43.1979	TRUE	HDL	12.2549	TRUE	HDL.Cholesterol	16.6108	TRUE	Cholesteryl.Esters.in.Large.HDL	2.0596	FALSE	0.36	25.9718	TRUE	Free cholesterol to total lipids ratio in large VLDL	29.1136	TRUE	Cholesteryl.Esters.in.Small.VLDL / Phospholipids.in.Small.VLDL	1.06318	FALSE	0.86	20.9428	Triglycerides to total lipids ratio in large VLDL	21.3586	Triglycerides.in.Large.VLDL / Concentration.of.Large.VLDL.Particles	4.35587	9.36103
2:118845121:G:A	460	430	.	duplicate model	FALSE	FALSE	FALSE	FALSE	FALSE	FALSE	FALSE	FALSE	.	not annotated	.	rs150474434	2	118845121	A	G	.	.	43.1965	TRUE	nonHDL	.	.	.	.	.	.	.	.	.	.	.	.	.	.	.	.	.	.	.	.	.	.	.	.
4:2888622:G:A	461	599	ADD1	r2 = 1 with rs3775067	FALSE	FALSE	FALSE	FALSE	FALSE	FALSE	FALSE	FALSE	.	not annotated	0.613369	rs3775067	4	2888622	A	G	14	rs3775067+rs13108218+rs17605615+rs114816312+rs13107325+rs138307849+rs6448429+rs17449582+rs6054+rs9942171+rs9884390+rs34311866+rs6822892+rs4450871+rs1126673	43.0953	TRUE	logTG	1.38385	FALSE	Total.Triglycerides	2.49265	FALSE	Total.Lipids.in.Very.Large.VLDL	.	.	.	2.72049	FALSE	Free cholesterol to total lipids ratio in chylomicrons and extremely large VLDL	3.60231	FALSE	Albumin / Average.Diameter.for.VLDL.Particles	.	.	.	1.33029	Ratio of polyunsaturated fatty acids to total fatty acids	2.40809	Total.Fatty.Acids / Phosphatidylcholines	1.1088	0.22784
12:21331549:T:C	462	1661	SLCO1B1,RP11-125O5.2	primary	TRUE	TRUE	TRUE	TRUE	TRUE	TRUE	TRUE	TRUE	SLCO1B1	can transport HMG-CoA reductase inhibitors	0.851128	rs4149056	12	21331549	C	T	3	rs4149056+rs76895963+rs12303671+rs79395356	43.0066	TRUE	logTG	12.2455	TRUE	Total.Triglycerides	34.4151	TRUE	Tyrosine	10.3057	TRUE	0.98	34.4151	TRUE	Tyrosine	72.0589	TRUE	Tyrosine / Monounsaturated.Fatty.Acids	13.3387	TRUE	1	19.1118	Phospholipids to total lipids ratio in large LDL	37.6438	Tyrosine / Monounsaturated.Fatty.Acids	22.1696	0
3:132181820:G:T	463	557	DNAJC13	r2 = 1 with rs74341202	FALSE	FALSE	FALSE	FALSE	FALSE	FALSE	FALSE	FALSE	.	not annotated	0.944724	rs77682405	3	132181820	T	G	2	rs77682405+rs13076933+rs9844432	42.8928	TRUE	TC	11.1165	TRUE	Total.Cholesterol	14.513	TRUE	Free.Cholesterol.in.IDL	.	.	.	14.513	TRUE	Free.Cholesterol.in.IDL	22.9083	TRUE	Albumin / Sphingomyelins	.	.	.	6.52033	Cholesterol to total lipids ratio in large VLDL	11.0197	Albumin / Sphingomyelins	3.39649	0
8:19824667:C:T	464	1197	.	duplicate model	FALSE	FALSE	FALSE	FALSE	FALSE	FALSE	FALSE	FALSE	.	not annotated	.	rs15285	8	19824667	T	C	.	.	42.8866	TRUE	HDL	.	.	.	.	.	.	.	.	.	.	.	.	.	.	.	.	.	.	.	.	.	.	.	.
13:114551993:T:C	465	1833	.	duplicate model	FALSE	FALSE	FALSE	FALSE	FALSE	FALSE	FALSE	FALSE	.	not annotated	.	rs6602909	13	114551993	C	T	.	.	42.873	TRUE	nonHDL	.	.	.	.	.	.	.	.	.	.	.	.	.	.	.	.	.	.	.	.	.	.	.	.
6:31272261:C:T	466	869	XXbac-BPG248L24.13-XXbac-BPG248L24.10,XXbac-BPG248L24.10,XXbac-BPG248L24.13	primary	TRUE	TRUE	TRUE	TRUE	TRUE	TRUE	TRUE	FALSE	.	.	0.303812	rs6457374	6	31272261	T	C	7	rs6457374+rs10455872+rs6689+rs2235215+rs80215559+rs9402685+rs78425119+rs3800461	42.6556	TRUE	TC	13.4694	TRUE	Total.Cholesterol	48.5588	TRUE	Glycoprotein.Acetyls	8.14839	TRUE	1	48.5588	TRUE	Glycoprotein.Acetyls	55.5496	TRUE	Glycoprotein.Acetyls / Creatinine	7.62043	TRUE	0.99	9.2721	Free cholesterol to total lipids ratio in large LDL	19.7905	Cholesterol.in.Large.LDL / Free.Cholesterol.in.LDL	35.0894	0
12:122963550:C:T	467	1765	ZCCHC8	primary	TRUE	TRUE	TRUE	TRUE	TRUE	TRUE	FALSE	FALSE	.	.	0.908451	rs12369179	12	122963550	T	C	7	rs12369179+rs61941677+rs7133378+rs2338104+rs12366872+rs73119306+rs3184504+rs11045172	42.6383	TRUE	HDL	15.3203	TRUE	HDL.Cholesterol	15.9742	TRUE	Cholesteryl.Esters.in.HDL	1.29956	FALSE	0.57	15.9742	TRUE	Cholesteryl.Esters.in.HDL	23.9403	TRUE	Triglycerides.in.Small.HDL / Monounsaturated.Fatty.Acids	1.97517	FALSE	0.73	5.13785	Triglycerides to total lipids ratio in small HDL	16.1361	Triglycerides.in.Small.HDL / Monounsaturated.Fatty.Acids	0.65395	0
17:45674687:A:T	468	2143	NPEPPS	r2 = 0.996 with rs2317826	FALSE	FALSE	FALSE	FALSE	FALSE	FALSE	FALSE	FALSE	.	not annotated	0.485504	rs8072100	17	45674687	T	A	2	rs8072100+rs186021206+rs77542162	42.4101	TRUE	nonHDL	37.4862	TRUE	Total.Cholesterol.Minus.HDL.C	42.2171	TRUE	Phospholipids.in.Small.LDL	.	.	.	42.2171	TRUE	Phospholipids.in.Small.LDL	64.2685	TRUE	Free.Cholesterol.in.Small.LDL / Glycine	.	.	.	21.652	Free cholesterol to total lipids ratio in small HDL	32.0102	Free.Cholesterol.in.Small.HDL / Phospholipids.in.Small.HDL	4.73086	0
20:39179822:G:C	469	2493	SNORD112-MAFB	primary	TRUE	TRUE	TRUE	TRUE	TRUE	TRUE	FALSE	TRUE	MAFB	promotes atherosclerosis by inhibiting foam-cell apoptosis; regulator of cholesterol homeostasis	0.969212	rs1883711	20	39179822	C	G	1	rs1883711+rs6073958	42.4067	TRUE	logTG	16.8762	TRUE	Total.Triglycerides	66.5653	TRUE	Cholesterol.in.Very.Small.VLDL	11.4452	TRUE	0.94	66.5653	TRUE	Cholesterol.in.Very.Small.VLDL	69.2939	TRUE	Cholesterol.in.Very.Small.VLDL / Average.Diameter.for.HDL.Particles	12.0251	TRUE	0.94	16.4434	Phospholipids to total lipids ratio in very large VLDL	37.0711	Concentration.of.HDL.Particles / Total.Concentration.of.Lipoprotein.Particles	49.6892	0
20:46340596:T:C	470	2526	SULF2	primary	TRUE	TRUE	TRUE	TRUE	TRUE	TRUE	TRUE	TRUE	SULF2	catalyses the removal of specific 6-O-sulphate groups from heparan sulphate proteoglycan involved in TRL clearance	0.207882	rs4239651	20	46340596	C	T	2	rs4239651+rs1800961+rs6065908	42.3947	TRUE	HDL	20.2368	TRUE	HDL.Cholesterol	23.2747	TRUE	Phospholipids.in.HDL	5.04848	TRUE	0.69	23.2747	TRUE	Phospholipids.in.HDL	25.1805	TRUE	Triglycerides.in.Small.HDL / Triglycerides.in.Medium.HDL	6.80864	TRUE	0.77	12.7339	Phospholipids to total lipids ratio in very small VLDL	23.3587	Triglycerides.in.Small.HDL / Triglycerides.in.Medium.HDL	3.03792	0
1:92971951:T:C	471	131	EVI5,GFI1-EVI5	r2 = 1 with rs4970705	FALSE	FALSE	FALSE	FALSE	FALSE	FALSE	FALSE	FALSE	.	not annotated	0.206702	rs2391159	1	92971951	C	T	9	rs2391159+rs12740374+rs11591147+rs553427+rs598253+rs557402933+rs186538116+rs10903129+rs114165349+rs2642438	42.1391	TRUE	LDL	4.15894	FALSE	Clinical.LDL.Cholesterol	7.92753	FALSE	Phospholipids.in.Very.Small.VLDL	.	.	.	8.82931	FALSE	Free cholesterol to total lipids ratio in small HDL	12.0472	TRUE	Phospholipids.in.Small.HDL / Total.Phospholipids.in.Lipoprotein.Particles	.	.	.	7.94292	Free cholesterol to total lipids ratio in small HDL	8.99629	Phospholipids.in.Small.HDL / Total.Phospholipids.in.Lipoprotein.Particles	3.76859	0.901779
8:126482077:A:G	472	1265	.	duplicate model	FALSE	FALSE	FALSE	FALSE	FALSE	FALSE	FALSE	FALSE	.	not annotated	.	rs2954021	8	126482077	G	A	.	.	42.1014	TRUE	TC	.	.	.	.	.	.	.	.	.	.	.	.	.	.	.	.	.	.	.	.	.	.	.	.
1:55598026:G:C	473	74	USP24	lead SNP monomorphic	FALSE	FALSE	FALSE	FALSE	FALSE	FALSE	FALSE	FALSE	.	not annotated	0.999998	rs185180972	1	55598026	C	G	1	rs185180972+rs646776	41.9914	TRUE	TC	.	.	.	.	.	.	.	.	.	.	.	.	.	.	.	.	.	.	.	.	.	.	.	.
9:136151579:TGGTGCAGGCGCAGGAAAAAATTGTGGCAATTCCTCA:T	474	1379	ABO-Y_RNA,ABO	r2 = 0.995 with rs2519093	FALSE	FALSE	FALSE	FALSE	FALSE	FALSE	FALSE	FALSE	.	not annotated	0.81423	rs8176636	9	136151579	T	TGGTGCAGGCGCAGGAAAAAATTGTGGCAATTCCTCA	0	rs8176636	41.961	TRUE	LDL	98.6731	TRUE	Clinical.LDL.Cholesterol	110.645	TRUE	Cholesteryl.Esters.in.Medium.VLDL	.	.	.	126.202	TRUE	Cholesterol to total lipids ratio in large VLDL	141.236	TRUE	Triglycerides.in.Small.LDL / Cholesteryl.Esters.in.Small.VLDL	.	.	.	116.887	Cholesterol to total lipids ratio in large VLDL	118.418	Cholesterol.in.Large.VLDL / Triglycerides.in.VLDL	11.9716	15.557
8:145044104:C:T	475	1284	PLEC	r2 = 0.862 with rs1134030	FALSE	FALSE	FALSE	FALSE	FALSE	FALSE	FALSE	FALSE	.	not annotated	0.642332	rs11787335	8	145044104	T	C	6	rs11787335+rs28601761+rs9987289+rs9297994+rs35570672+rs2737245+rs9298506	41.7471	TRUE	TC	11.8996	TRUE	Total.Cholesterol	19.1965	TRUE	Cholesteryl.Esters.in.Medium.VLDL	.	.	.	19.1965	TRUE	Cholesteryl.Esters.in.Medium.VLDL	22.9061	TRUE	Triglycerides.in.Small.HDL / Cholesteryl.Esters.in.Small.VLDL	.	.	.	10.5012	Free cholesterol to total lipids ratio in small HDL	17.4	Triglycerides.in.Small.HDL / Total.Lipids.in.Small.VLDL	7.29699	0
11:14865399:C:T	476	1499	PDE3B	r2 = 1 with rs150090666	FALSE	FALSE	FALSE	FALSE	FALSE	FALSE	FALSE	FALSE	.	not annotated	0.999185	rs150090666	11	14865399	T	C	9	rs150090666+rs964184+rs192489212+rs174564+rs10838684+rs6589939+rs11229252+rs673335+rs56271783+rs73632737	41.7282	TRUE	HDL	10.7483	TRUE	HDL.Cholesterol	18.4508	TRUE	Triglycerides.in.Small.HDL	.	.	.	20.3931	TRUE	Triglycerides to total lipids ratio in small HDL	21.3904	TRUE	Free.Cholesterol.in.Small.HDL / Total.Concentration.of.Lipoprotein.Particles	.	.	.	12.6152	Free cholesterol to total lipids ratio in large LDL	19.6797	Free.Cholesterol.in.Small.HDL / Total.Concentration.of.Lipoprotein.Particles	7.70252	1.94228
8:55437524:A:G	477	1219	RP11-53M11.2-RP11-53M11.3,RP11-53M11.2	primary	TRUE	TRUE	TRUE	TRUE	TRUE	FALSE	FALSE	FALSE	.	.	0.789509	rs9298506	8	55437524	G	A	6	rs9298506+rs28601761+rs9297994+rs15285+rs4841132+rs1495741+rs2721961	41.6737	TRUE	nonHDL	9.92971	TRUE	Total.Cholesterol.Minus.HDL.C	12.9697	TRUE	Concentration.of.Large.LDL.Particles	4.58078	TRUE	0.01	12.9697	TRUE	Concentration.of.Large.LDL.Particles	13.5768	TRUE	Concentration.of.Large.LDL.Particles / Albumin	4.23805	TRUE	0.03	2.33656	Triglycerides to total lipids ratio in chylomicrons and extremely large VLDL	5.09487	Total.Lipids.in.Chylomicrons.and.Extremely.Large.VLDL / Concentration.of.Chylomicrons.and.Extremely.Large.VLDL.Particles	3.04002	0
19:45413233:G:T	478	2408	.	duplicate model	FALSE	FALSE	FALSE	FALSE	FALSE	FALSE	FALSE	FALSE	.	not annotated	.	rs1065853	19	45413233	T	G	.	.	41.6587	TRUE	nonHDL	.	.	.	.	.	.	.	.	.	.	.	.	.	.	.	.	.	.	.	.	.	.	.	.
2:27734972:G:A	479	353	GCKR	r2 = 0.784 with rs1260326	FALSE	FALSE	FALSE	FALSE	FALSE	FALSE	FALSE	FALSE	.	not annotated	0.442172	rs6547692	2	27734972	A	G	1	rs6547692+rs57825321	41.6517	TRUE	TC	42.8479	TRUE	Total.Cholesterol	235.032	TRUE	Monounsaturated.Fatty.Acids	.	.	.	235.032	TRUE	Monounsaturated.Fatty.Acids	341.72	TRUE	Glutamine / Total.Fatty.Acids	.	.	.	133.526	Free cholesterol to total lipids ratio in large LDL	164.351	Free.Cholesterol.in.Medium.HDL / HDL.Cholesterol	192.184	0
8:126482077:A:G	480	1263	RP11-136O12.2	primary	TRUE	TRUE	TRUE	TRUE	TRUE	TRUE	FALSE	FALSE	.	.	0.493452	rs2954021	8	126482077	G	A	1	rs2954021+rs74855321	41.5317	TRUE	logTG	188.765	TRUE	Total.Triglycerides	232.282	TRUE	Triglycerides.in.IDL	32.3744	TRUE	1	232.282	TRUE	Triglycerides.in.IDL	274.04	TRUE	Citrate / Triglycerides.in.LDL	36.241	TRUE	1	144.307	Cholesteryl esters to total lipids ratio in medium HDL	176.164	Cholesteryl.Esters.in.Medium.HDL / Concentration.of.Medium.HDL.Particles	43.5177	0
2:65284231:A:T	481	399	CEP68	r2 = 1 with rs2540949	FALSE	FALSE	FALSE	FALSE	FALSE	FALSE	FALSE	FALSE	.	not annotated	0.627922	rs2540949	2	65284231	T	A	5	rs2540949+rs1260326+rs676210+rs1024137+rs13389219+rs78058190	41.4584	TRUE	logTG	9.57721	TRUE	Total.Triglycerides	9.93529	TRUE	Triglycerides.in.Very.Large.VLDL	.	.	.	10.6625	TRUE	Inverse Ratio of triglycerides to phosphoglycerides	11.6512	TRUE	Monounsaturated.Fatty.Acids / Total.Triglycerides	.	.	.	6.22963	Free cholesterol to total lipids ratio in large LDL	9.92193	Free.Cholesterol.in.Small.HDL / Total.Concentration.of.Lipoprotein.Particles	0.358083	0.727236
1:149995966:C:T	482	171	OTUD7B-RP11-458I7.1	r2 = 0.823 with rs10494363	FALSE	FALSE	FALSE	FALSE	FALSE	FALSE	FALSE	FALSE	.	not annotated	0.90696	rs72692849	1	149995966	T	C	14	rs72692849+rs10127775+rs3768321+rs646776+rs75460349+rs2642438+rs4847419+rs1689797+rs333947+rs267738+rs10913570+rs553427+rs59770119+rs3747973+rs181473381	41.4145	TRUE	HDL	3.25623	FALSE	HDL.Cholesterol	6.13811	FALSE	Triglycerides.in.Small.HDL	.	.	.	7.9784	FALSE	Triglycerides to total lipids ratio in very large HDL	8.53345	FALSE	Cholesteryl.Esters.in.Very.Large.HDL / Concentration.of.Very.Large.HDL.Particles	.	.	.	5.11535	Cholesterol to total lipids ratio in very small VLDL	6.9467	Cholesterol.in.Very.Small.VLDL / Concentration.of.Very.Small.VLDL.Particles	2.88188	1.84029
4:110638824:C:T	483	695	PLA2G12A	MAF<1%	FALSE	FALSE	FALSE	FALSE	FALSE	FALSE	FALSE	FALSE	.	not annotated	0.99212	rs114816312	4	110638824	T	C	2	rs114816312+rs13107325+rs2167750	41.3206	TRUE	HDL	14.5488	TRUE	HDL.Cholesterol	25.2493	TRUE	Cholesteryl.Esters.in.Chylomicrons.and.Extremely.Large.VLDL	.	.	.	34.8473	TRUE	Phospholipids to total lipids ratio in medium HDL	61.2871	TRUE	Total.Lipids.in.Medium.LDL / Cholesteryl.Esters.in.VLDL	.	.	.	27.2098	Phospholipids to total lipids ratio in medium HDL	50.4546	Apolipoprotein.B / Phospholipids.in.LDL	10.7006	9.59793
19:11192193:A:T	484	2295	SMARCA4-LDLR	r2 = 0.997 with rs73015024	FALSE	FALSE	FALSE	FALSE	FALSE	FALSE	FALSE	FALSE	.	not annotated	0.880762	rs61194703	19	11192193	T	A	1	rs61194703+rs1065853	41.1537	TRUE	TC	403.451	TRUE	Total.Cholesterol	590.148	TRUE	Cholesteryl.Esters.in.Medium.VLDL	.	.	.	590.148	TRUE	Cholesteryl.Esters.in.Medium.VLDL	719.138	TRUE	Cholesterol.in.Small.HDL / Free.Cholesterol.in.Large.LDL	.	.	.	264.551	Free cholesterol to total lipids ratio in large HDL	427.772	Triglycerides.in.Small.VLDL / Phospholipids.in.VLDL	186.697	0
7:73020301:T:C	485	1091	MLXIPL	primary	TRUE	TRUE	TRUE	TRUE	TRUE	TRUE	TRUE	FALSE	MLXIPL (2)	secondary association with LPmtr gene	0.0434262	rs799157	7	73020301	C	T	2	rs799157+rs17725246+rs55696093	41.1255	TRUE	nonHDL	8.30288	TRUE	Total.Cholesterol.Minus.HDL.C	44.4519	TRUE	Triglycerides.in.Small.VLDL	5.48745	TRUE	1	44.4519	TRUE	Triglycerides.in.Small.VLDL	53.5636	TRUE	Triglycerides.in.Small.VLDL / Histidine	6.83024	TRUE	1	26.9132	Free cholesterol to total lipids ratio in large LDL	37.0151	Cholesterol.in.IDL / Total.Cholesterol.Minus.HDL.C	36.149	0
5:52095024:C:T	486	722	ITGA1,PELO	r2 = 1 with rs116734477	FALSE	FALSE	FALSE	FALSE	FALSE	FALSE	FALSE	FALSE	.	not annotated	0.958685	rs116734477	5	52095024	T	C	2	rs116734477+rs12916+rs12657266	41.0074	TRUE	LDL	20.8969	TRUE	Clinical.LDL.Cholesterol	27.3539	TRUE	Free.Cholesterol.in.Small.LDL	.	.	.	27.3539	TRUE	Free.Cholesterol.in.Small.LDL	30.6978	TRUE	Free.Cholesterol.in.Small.LDL / Albumin	.	.	.	12.102	Cholesterol to total lipids ratio in very large HDL	22.9779	Triglycerides.in.Large.LDL / Triglycerides.in.HDL	6.45701	0
19:11196356:AC:A	487	2296	SMARCA4-LDLR,LDLR	r2 = 1 with rs73015024	FALSE	FALSE	FALSE	FALSE	FALSE	FALSE	FALSE	FALSE	.	not annotated	0.88094	rs139306531	19	11196356	A	AC	1	rs139306531+rs7412	40.8356	TRUE	LDL	500.453	TRUE	Clinical.LDL.Cholesterol	592.274	TRUE	Cholesteryl.Esters.in.Medium.VLDL	.	.	.	592.274	TRUE	Cholesteryl.Esters.in.Medium.VLDL	720.132	TRUE	Cholesterol.in.Small.HDL / Free.Cholesterol.in.Large.LDL	.	.	.	264.724	Triglycerides to total lipids ratio in small VLDL	429.078	Triglycerides.in.Small.VLDL / Phospholipids.in.VLDL	91.8207	0
19:45412079:C:T	488	2402	.	duplicate model	FALSE	FALSE	FALSE	FALSE	FALSE	FALSE	FALSE	FALSE	.	not annotated	.	rs7412	19	45412079	T	C	.	.	40.7794	TRUE	TC	.	.	.	.	.	.	.	.	.	.	.	.	.	.	.	.	.	.	.	.	.	.	.	.
10:113940329:T:C	489	1455	.	duplicate model	FALSE	FALSE	FALSE	FALSE	FALSE	FALSE	FALSE	FALSE	.	not annotated	.	rs2792751	10	113940329	C	T	.	.	40.6924	TRUE	LDL	.	.	.	.	.	.	.	.	.	.	.	.	.	.	.	.	.	.	.	.	.	.	.	.
8:11528339:G:C	490	1171	LINC00208-GATA4	primary	TRUE	TRUE	TRUE	TRUE	TRUE	TRUE	FALSE	FALSE	.	.	0.869975	rs4320509	8	11528339	C	G	5	rs4320509+rs328+rs28601761+rs35246381+rs7821812+rs2081687	40.6234	TRUE	logTG	13.5381	TRUE	Total.Triglycerides	16.671	TRUE	Triglycerides.in.HDL	3.49653	FALSE	0.5	17.7733	TRUE	Triglycerides to total lipids ratio in very small VLDL	24.2501	TRUE	Cholesterol.in.IDL / Linoleic.Acid	1.94825	FALSE	0.88	16.3969	Phospholipids to total lipids ratio in small LDL	19.9643	Total.Lipids.in.IDL / Total.Free.Cholesterol	3.13288	1.10236
3:172294500:G:A	491	591	RP11-408H1.3	primary	TRUE	TRUE	TRUE	TRUE	TRUE	TRUE	TRUE	FALSE	.	.	0.972773	rs79287178	3	172294500	A	G	1	rs79287178+rs684773	40.6162	TRUE	logTG	12.0808	TRUE	Total.Triglycerides	21.445	TRUE	Glycoprotein.Acetyls	2.15279	FALSE	0.6	21.445	TRUE	Glycoprotein.Acetyls	24.9504	TRUE	Cholesteryl.Esters.in.Small.LDL / Concentration.of.IDL.Particles	2.54932	FALSE	0.8	13.2999	Cholesteryl esters to total lipids ratio in very small VLDL	21.5685	Cholesterol.in.IDL / LDL.Cholesterol	9.36419	0
9:107589744:C:T	492	1334	ABCA1	primary	TRUE	TRUE	TRUE	TRUE	TRUE	TRUE	FALSE	FALSE	ABCA1 (2)	secondary association with LPmtr gene	0.84812	rs4149307	9	107589744	T	C	0	rs4149307	40.525	TRUE	HDL	31.644	TRUE	HDL.Cholesterol	40.9938	TRUE	Triglycerides.in.Large.HDL	10.124	TRUE	0.99	63.3217	TRUE	Phospholipids to total lipids ratio in medium HDL	92.9998	TRUE	Triglycerides.in.Very.Large.HDL / Triglycerides.in.Very.Small.VLDL	22.8446	TRUE	1	45.7555	Phospholipids to total lipids ratio in medium HDL	60.1067	Triglycerides.in.Very.Large.HDL / Triglycerides.in.Very.Small.VLDL	9.34978	22.3279
10:94839724:G:T	493	1438	CYP26A1,CYP26A1-NIP7P1	primary	TRUE	TRUE	TRUE	TRUE	TRUE	TRUE	TRUE	TRUE	CYP26A1	regulates the cellular level of retinoic acid	0.55186	rs4418728	10	94839724	T	G	3	rs4418728+rs2792751+rs55665473+rs72823014	40.433	TRUE	HDL	10.2321	TRUE	HDL.Cholesterol	29.832	TRUE	Concentration.of.Small.VLDL.Particles	2.57599	FALSE	0.84	29.832	TRUE	Concentration.of.Small.VLDL.Particles	47.1955	TRUE	Total.Lipids.in.Small.VLDL / Citrate	6.14315	TRUE	0.98	14.6502	Cholesterol to total lipids ratio in medium HDL	28.2596	Phosphoglycerides / Free.Cholesterol.in.HDL	19.5999	0
13:114551993:T:C	494	1831	GAS6	r2 = 1 with rs6602909	FALSE	FALSE	FALSE	FALSE	FALSE	FALSE	FALSE	FALSE	.	not annotated	0.675135	rs6602909	13	114551993	C	T	1	rs6602909+rs368213791	40.4089	TRUE	LDL	13.9215	TRUE	Clinical.LDL.Cholesterol	30.2838	TRUE	Phospholipids.in.Very.Small.VLDL	.	.	.	30.2838	TRUE	Phospholipids.in.Very.Small.VLDL	34.8701	TRUE	Phospholipids.in.Small.HDL / Total.Fatty.Acids	.	.	.	6.9324	Cholesteryl esters to total lipids ratio in medium HDL	19.7595	Concentration.of.HDL.Particles / Total.Concentration.of.Lipoprotein.Particles	16.3623	0
8:10643164:C:T	495	1167	SNORD112,PINX1,SOX7	r2 = 0.97 with rs7821812	FALSE	FALSE	FALSE	FALSE	FALSE	FALSE	FALSE	FALSE	.	not annotated	0.79637	rs9657541	8	10643164	T	C	6	rs9657541+rs15285+rs9987289+rs2954038+rs3808460+rs7817574+rs10955991	40.2941	TRUE	HDL	8.10251	TRUE	HDL.Cholesterol	28.0287	TRUE	Average.Diameter.for.VLDL.Particles	.	.	.	31.8283	TRUE	Cholesteryl esters to total lipids ratio in medium VLDL	41.8584	TRUE	Triglycerides.in.IDL / Triglycerides.in.Very.Small.VLDL	.	.	.	25.2151	Cholesterol to total lipids ratio in very small VLDL	31.5142	Free.Cholesterol.in.Medium.VLDL / Cholesterol.in.Medium.VLDL	19.9262	3.79962
9:131466489:G:T	496	1370	PKN3	r2 = 1 with rs13289095	FALSE	FALSE	FALSE	FALSE	FALSE	FALSE	FALSE	FALSE	.	not annotated	0.855495	rs13289095	9	131466489	T	G	3	rs13289095+rs2519093+rs2740488+rs12551960	40.2924	TRUE	TC	10.3665	TRUE	Total.Cholesterol	13.4584	TRUE	Cholesteryl.Esters.in.Medium.VLDL	.	.	.	13.4584	TRUE	Cholesteryl.Esters.in.Medium.VLDL	15.1223	TRUE	Cholesteryl.Esters.in.Medium.VLDL / Apolipoprotein.B	.	.	.	9.31788	Triglycerides to total lipids ratio in small VLDL	11.6959	Total.Lipids.in.VLDL / Total.Triglycerides	3.09188	0
8:9183596:A:G	497	1153	RP11-115J16.1	r2 = 0.978 with rs111675407	FALSE	FALSE	FALSE	FALSE	FALSE	FALSE	FALSE	FALSE	.	not annotated	0.0923372	rs4841132	8	9183596	G	A	1	rs4841132+rs117199990	40.279	TRUE	HDL	88.4983	TRUE	HDL.Cholesterol	154.858	TRUE	Glycine	.	.	.	154.858	TRUE	Glycine	270.007	TRUE	Glycine / Cholesteryl.Esters.in.HDL	.	.	.	53.8661	Phospholipids to total lipids ratio in very small VLDL	115.148	Glycine / Cholesteryl.Esters.in.HDL	66.3598	0
16:72079657:C:T	498	2026	.	duplicate model	FALSE	FALSE	FALSE	FALSE	FALSE	FALSE	FALSE	FALSE	.	not annotated	.	rs77303550	16	72079657	T	C	.	.	40.2764	TRUE	LDL	.	.	.	.	.	.	.	.	.	.	.	.	.	.	.	.	.	.	.	.	.	.	.	.
9:131466489:G:T	499	1368	PKN3	r2 = 1 with rs13289095	FALSE	FALSE	FALSE	FALSE	FALSE	FALSE	FALSE	FALSE	.	not annotated	0.855495	rs13289095	9	131466489	T	G	2	rs13289095+rs2519093+rs2740488	40.1979	TRUE	LDL	10.8225	TRUE	Clinical.LDL.Cholesterol	13.4471	TRUE	Cholesteryl.Esters.in.Medium.VLDL	.	.	.	13.4471	TRUE	Cholesteryl.Esters.in.Medium.VLDL	15.1086	TRUE	Cholesteryl.Esters.in.Medium.VLDL / Apolipoprotein.B	.	.	.	9.31038	Triglycerides to total lipids ratio in small VLDL	11.6856	Total.Lipids.in.VLDL / Total.Triglycerides	2.62459	0
14:105258437:G:T	500	1880	AKT1	primary	TRUE	TRUE	TRUE	TRUE	TRUE	TRUE	TRUE	TRUE	AKT1	major mediator of insulin signaling, upstream of MTORC1, directly phosphorylates TSC complex; a downstream mediator of the PI 3-K pathway	0.382402	rs2494747	14	105258437	T	G	0	rs2494747	40.1358	TRUE	HDL	18.4979	TRUE	HDL.Cholesterol	20.1963	TRUE	Concentration.of.HDL.Particles	4.84832	TRUE	0.6	27.0428	TRUE	Phospholipids to total lipids ratio in medium HDL	36.0209	TRUE	Total.Lipids.in.Medium.HDL / Concentration.of.Medium.HDL.Particles	9.56443	TRUE	0.92	13.3281	Phospholipids to total lipids ratio in medium HDL	18.9348	Total.Lipids.in.Medium.HDL / Concentration.of.Medium.HDL.Particles	1.6984	6.84647
2:121306440:G:A	501	434	AC073257.2,AC073257.1,AC073257.2-AC073257.1	r2 = 1 with rs17050272	FALSE	FALSE	FALSE	FALSE	FALSE	FALSE	FALSE	FALSE	.	not annotated	0.588749	rs17050272	2	121306440	A	G	7	rs17050272+rs934197+rs4299376+rs1260326+rs907866+rs113867238+rs10184673+rs55938402	40	TRUE	TC	4.83752	FALSE	Total.Cholesterol	12.8943	TRUE	Creatinine	.	.	.	12.8943	TRUE	Creatinine	26.6972	TRUE	Phospholipids.in.Small.LDL / Creatinine	.	.	.	6.1225	Phospholipids to total lipids ratio in small HDL	13.8029	Phospholipids.in.Small.LDL / Creatinine	8.0568	0
16:68866671:C:G	502	2011	CDH1	MAF<1%	FALSE	FALSE	FALSE	FALSE	FALSE	FALSE	FALSE	FALSE	.	not annotated	0.999551	rs571298027	16	68866671	G	C	4	rs571298027+rs183130+rs55781197+rs2925979+rs560117104	39.9281	TRUE	HDL	6.46901	FALSE	HDL.Cholesterol	7.75149	FALSE	Concentration.of.HDL.Particles	.	.	.	7.9776	FALSE	Phospholipids to total lipids ratio in medium HDL	18.8355	TRUE	Free.Cholesterol.in.Large.HDL / Concentration.of.Large.HDL.Particles	.	.	.	4.24883	Cholesteryl esters to total lipids ratio in very large HDL	15.6178	Free.Cholesterol.in.Large.HDL / Concentration.of.Large.HDL.Particles	1.28248	0.226103
14:24871926:C:T	503	1835	NYNRIN	primary	TRUE	TRUE	TRUE	TRUE	TRUE	TRUE	TRUE	FALSE	.	.	0.547075	rs11621792	14	24871926	T	C	0	rs11621792	39.9172	TRUE	LDL	17.7609	TRUE	Clinical.LDL.Cholesterol	21.2575	TRUE	Phospholipids.in.Medium.LDL	4.34929	TRUE	0.41	21.2575	TRUE	Phospholipids.in.Medium.LDL	35.4393	TRUE	Phospholipids.in.Medium.LDL / Histidine	5.53127	TRUE	0.87	5.60652	Phospholipids to total lipids ratio in very large HDL	14.4769	Free.Cholesterol.in.Small.HDL / Histidine	3.49661	0
2:21818551:A:G	504	302	AC067959.1	lead SNP monomorphic	FALSE	FALSE	FALSE	FALSE	FALSE	FALSE	FALSE	FALSE	.	not annotated	1	rs147821144	2	21818551	G	A	2	rs147821144+rs57825321+rs6547692	39.8477	TRUE	TC	.	.	.	.	.	.	.	.	.	.	.	.	.	.	.	.	.	.	.	.	.	.	.	.
7:1047615:A:G	505	1029	C7orf50	r2 = 0.976 with rs2362529	FALSE	FALSE	FALSE	FALSE	FALSE	FALSE	FALSE	FALSE	.	not annotated	0.784099	rs10272002	7	1047615	G	A	3	rs10272002+rs17725246+rs55696093+rs4722551	39.6308	TRUE	TC	17.6216	TRUE	Total.Cholesterol	41.9603	TRUE	Cholesteryl.Esters.in.Very.Small.VLDL	.	.	.	41.9603	TRUE	Cholesteryl.Esters.in.Very.Small.VLDL	46.9524	TRUE	Cholesterol.in.Very.Small.VLDL / Average.Diameter.for.VLDL.Particles	.	.	.	24.1913	Free cholesterol to total lipids ratio in small HDL	36.4423	Cholesteryl.Esters.in.Small.HDL / Cholesterol.in.Small.HDL	24.3387	0
15:58680184:C:T	506	1914	ALDH1A2	r2 = 0.96 with rs261290	FALSE	FALSE	FALSE	FALSE	FALSE	FALSE	FALSE	FALSE	.	not annotated	0.644267	rs7177289	15	58680184	T	C	0	rs7177289	39.628	TRUE	HDL	301.957	TRUE	HDL.Cholesterol	1975.52	TRUE	Triglycerides.in.Large.HDL	.	.	.	1975.52	TRUE	Triglycerides.in.Large.HDL	2546.27	TRUE	Free.Cholesterol.in.Small.HDL / Concentration.of.Small.HDL.Particles	.	.	.	1324.81	Free cholesterol to total lipids ratio in small HDL	2407.87	Free.Cholesterol.in.Small.HDL / Concentration.of.Small.HDL.Particles	1673.56	0
20:34136791:C:T	507	2487	ERGIC3,RPL36P4	r2 = 0.994 with rs7261820	FALSE	FALSE	FALSE	FALSE	FALSE	FALSE	FALSE	FALSE	.	not annotated	0.862726	rs45563939	20	34136791	T	C	3	rs45563939+rs1883711+rs2618566+rs6029552	39.4935	TRUE	nonHDL	15.3532	TRUE	Total.Cholesterol.Minus.HDL.C	18.3626	TRUE	Polyunsaturated.Fatty.Acids	.	.	.	18.3626	TRUE	Polyunsaturated.Fatty.Acids	22.1909	TRUE	Albumin / Polyunsaturated.Fatty.Acids	.	.	.	3.02098	Free cholesterol to total lipids ratio in large HDL	5.96373	Cholesteryl.Esters.in.Medium.HDL / Cholesterol.in.Medium.HDL	3.00939	0
9:136151579:TGGTGCAGGCGCAGGAAAAAATTGTGGCAATTCCTCA:T	508	1380	.	duplicate model	FALSE	FALSE	FALSE	FALSE	FALSE	FALSE	FALSE	FALSE	.	not annotated	.	rs8176636	9	136151579	T	TGGTGCAGGCGCAGGAAAAAATTGTGGCAATTCCTCA	.	.	39.3316	TRUE	nonHDL	.	.	.	.	.	.	.	.	.	.	.	.	.	.	.	.	.	.	.	.	.	.	.	.
3:12327431:T:G	509	497	.	duplicate model	FALSE	FALSE	FALSE	FALSE	FALSE	FALSE	FALSE	FALSE	.	not annotated	.	rs13076933	3	12327431	G	T	.	.	39.3251	TRUE	LDL	.	.	.	.	.	.	.	.	.	.	.	.	.	.	.	.	.	.	.	.	.	.	.	.
20:43042364:C:T	510	2507	HNF4A	primary	TRUE	TRUE	TRUE	TRUE	TRUE	TRUE	TRUE	TRUE	HNF4A	central regulator of lipid metabolism; liver fat storage is controlled by HNF4-alpha through induction of lipophagy	0.968872	rs1800961	20	43042364	T	C	4	rs1800961+rs1883711+rs2618566+rs6029549+rs7261820	39.2182	TRUE	LDL	19.809	TRUE	Clinical.LDL.Cholesterol	67.3189	TRUE	Total.Concentration.of.Lipoprotein.Particles	8.71626	TRUE	1	67.3189	TRUE	Total.Concentration.of.Lipoprotein.Particles	70.6668	TRUE	Albumin / Total.Concentration.of.Lipoprotein.Particles	9.97465	TRUE	1	35.0291	Phospholipids to total lipids ratio in very small VLDL	49.8187	Cholesteryl.Esters.in.Small.VLDL / Free.Cholesterol.in.Medium.VLDL	47.51	0
17:64210580:A:C	511	2162	APOH	r2 = 1 with rs1801689	FALSE	FALSE	FALSE	FALSE	FALSE	FALSE	FALSE	FALSE	.	not annotated	0.970231	rs1801689	17	64210580	C	A	4	rs1801689+rs72836561+rs79202680+rs11656743+rs7212201	39.1938	TRUE	logTG	18.7377	TRUE	Total.Triglycerides	63.5347	TRUE	Average.Diameter.for.VLDL.Particles	.	.	.	90.3449	TRUE	Cholesteryl esters to total lipids ratio in large VLDL	108.919	TRUE	Triglycerides.in.Large.LDL / Monounsaturated.Fatty.Acids	.	.	.	69.7806	Phospholipids to total lipids ratio in medium VLDL	98.2949	Triglycerides.in.Large.LDL / Monounsaturated.Fatty.Acids	44.797	26.8102
4:103188709:C:T	512	686	SLC39A8	primary	TRUE	TRUE	FALSE	TRUE	TRUE	TRUE	TRUE	FALSE	.	.	0.925684	rs13107325	4	103188709	T	C	3	rs13107325+rs13108218+rs17605615+rs114816312	38.9626	TRUE	logTG	4.12045	FALSE	Total.Triglycerides	43.3983	TRUE	HDL.Cholesterol	1.26863	FALSE	0.99	46.0737	TRUE	Free cholesterol to total lipids ratio in medium HDL	46.0737	TRUE	Free.Cholesterol.in.Medium.HDL / Total.Lipids.in.Medium.HDL	2.23856	FALSE	1	26.4715	Phospholipids to total lipids ratio in very small VLDL	40.9027	Saturated.Fatty.Acids / Triglycerides.in.LDL	39.2778	2.67544
4:155489608:C:T	513	713	FGB	r2 = 1 with rs6054	FALSE	FALSE	FALSE	FALSE	FALSE	FALSE	FALSE	FALSE	.	not annotated	0.994409	rs6054	4	155489608	T	C	7	rs6054+rs573930512+rs537526354+rs4860987+rs13108218+rs938075289+rs13107325+rs189087436	38.9626	TRUE	TC	13.9599	TRUE	Total.Cholesterol	23.7389	TRUE	Linoleic.Acid	.	.	.	23.7389	TRUE	Linoleic.Acid	26.3078	TRUE	Linoleic.Acid / Omega.6.Fatty.Acids	.	.	.	9.23845	Phospholipids to total lipids ratio in large HDL	16.0975	Total.Lipids.in.Large.HDL / Concentration.of.Large.HDL.Particles	9.77901	0
3:32514647:T:A	514	510	CMTM7	primary	TRUE	TRUE	TRUE	TRUE	TRUE	TRUE	FALSE	FALSE	.	.	0.925995	rs9837622	3	32514647	A	T	2	rs9837622+rs13076933+rs71311871	38.9431	TRUE	LDL	11.3399	TRUE	Clinical.LDL.Cholesterol	14.4478	TRUE	Cholesteryl.Esters.in.Medium.VLDL	0.930475	FALSE	0.16	14.4478	TRUE	Cholesteryl.Esters.in.Medium.VLDL	16.3131	TRUE	Cholesteryl.Esters.in.Medium.VLDL / Albumin	0.87595	FALSE	0.14	5.08523	Phospholipids to total lipids ratio in small HDL	11.6324	Concentration.of.HDL.Particles / Total.Concentration.of.Lipoprotein.Particles	3.10793	0
2:44663206:T:A	515	376	CAMKMT	r2 = 0.846 with rs140879085	FALSE	FALSE	FALSE	FALSE	FALSE	FALSE	FALSE	FALSE	.	not annotated	0.990858	rs556971810	2	44663206	A	T	11	rs556971810+rs934197+rs4299376+rs1260326+rs907866+rs113867238+rs10184673+rs55938402+rs17050272+rs887829+rs1375131+rs4671050	38.8894	TRUE	TC	4.13311	FALSE	Total.Cholesterol	7.32995	FALSE	Free.Cholesterol.in.Small.LDL	.	.	.	7.32995	FALSE	Free.Cholesterol.in.Small.LDL	11.1734	FALSE	Total.Lipids.in.Small.HDL / Free.Cholesterol.in.LDL	.	.	.	4.76829	Phospholipids to total lipids ratio in large HDL	6.97554	Triglycerides.in.Small.HDL / Concentration.of.VLDL.Particles	3.19684	0
10:94839642:G:A	516	1434	.	duplicate model	FALSE	FALSE	FALSE	FALSE	FALSE	FALSE	FALSE	FALSE	.	not annotated	.	rs2068888	10	94839642	A	G	.	.	38.8544	TRUE	nonHDL	.	.	.	.	.	.	.	.	.	.	.	.	.	.	.	.	.	.	.	.	.	.	.	.
2:21818551:A:G	517	301	AC067959.1	lead SNP monomorphic	FALSE	FALSE	FALSE	FALSE	FALSE	FALSE	FALSE	FALSE	.	not annotated	1	rs147821144	2	21818551	G	A	1	rs147821144+rs57825321	38.8356	TRUE	nonHDL	.	.	.	.	.	.	.	.	.	.	.	.	.	.	.	.	.	.	.	.	.	.	.	.
22:44324727:C:G	518	2604	PNPLA3	r2 = 0.991 with rs3747207	FALSE	FALSE	FALSE	FALSE	FALSE	FALSE	FALSE	FALSE	.	not annotated	0.783261	rs738409	22	44324727	G	C	0	rs738409	38.7019	TRUE	TC	1.14467	FALSE	Total.Cholesterol	39.4372	TRUE	Average.Diameter.for.LDL.Particles	.	.	.	54.8592	TRUE	Phospholipids to total lipids ratio in IDL	131.24	TRUE	Triglycerides.in.IDL / Saturated.Fatty.Acids	.	.	.	52.2224	Phospholipids to total lipids ratio in IDL	116.511	Triglycerides.in.IDL / Saturated.Fatty.Acids	38.2925	15.422
1:54872512:.:.	519	58	.	lead SNP not available	FALSE	FALSE	FALSE	FALSE	FALSE	FALSE	FALSE	FALSE	.	not annotated	.	rs2	1	54872512	.	.	.	.	38.6536	TRUE	nonHDL	.	.	.	.	.	.	.	.	.	.	.	.	.	.	.	.	.	.	.	.	.	.	.	.
6:31295941:C:G	520	870	XXbac-BPG248L24.10-HLA-B	primary	TRUE	TRUE	TRUE	TRUE	TRUE	TRUE	TRUE	FALSE	.	.	0.627889	rs76716928	6	31295941	G	C	5	rs76716928+rs41272086+rs998584+rs2263329+rs17585887+rs72959041	38.58	TRUE	HDL	19.3534	TRUE	HDL.Cholesterol	19.3534	TRUE	HDL.Cholesterol	3.14936	FALSE	0.65	19.3534	TRUE	HDL.Cholesterol	24.7022	TRUE	Free.Cholesterol.in.Medium.HDL / Creatinine	3.05416	FALSE	0.85	7.04613	Free cholesterol to total lipids ratio in very large HDL	13.2119	Total.Lipids.in.Large.LDL / Phospholipids.in.LDL	0	0
19:50016759:C:T	521	2442	FCGRT	r2 = 1 with rs142385484	FALSE	FALSE	FALSE	FALSE	FALSE	FALSE	FALSE	FALSE	.	not annotated	0.855419	rs142385484	19	50016759	T	C	9	rs142385484+rs7412+rs73015024+rs58542926+rs7255743+rs516246+rs62116778+rs75916629+rs35081008+rs12720359	38.556	TRUE	TC	9.66848	TRUE	Total.Cholesterol	43.0503	TRUE	Albumin	.	.	.	43.0503	TRUE	Albumin	67.1927	TRUE	Albumin / Omega.6.Fatty.Acids	.	.	.	2.98872	Phospholipids to total lipids ratio in very large HDL	24.1425	Albumin / Omega.6.Fatty.Acids	33.3818	0
5:156391628:T:C	522	804	TIMD4,TIMD4-HAVCR1	r2 = 0.899 with rs4704834	FALSE	FALSE	FALSE	FALSE	FALSE	FALSE	FALSE	FALSE	.	not annotated	0.363934	rs6874202	5	156391628	C	T	1	rs6874202+rs10590407	38.5421	TRUE	TC	38.8632	TRUE	Total.Cholesterol	65.9568	TRUE	Concentration.of.Large.LDL.Particles	.	.	.	65.9568	TRUE	Concentration.of.Large.LDL.Particles	76.3398	TRUE	Phospholipids.in.Large.LDL / Cholesterol.in.Medium.VLDL	.	.	.	12.3898	Free cholesterol to total lipids ratio in large HDL	37.3238	Concentration.of.HDL.Particles / Total.Concentration.of.Lipoprotein.Particles	27.0936	0
2:169832362:G:A	523	463	ABCB11	primary	TRUE	TRUE	TRUE	TRUE	TRUE	TRUE	TRUE	TRUE	ABCB11	participates in hepatic bile acid homeostasis and consequently to lipid homeostasis through regulation of biliary lipid secretion	0.393429	rs66491446	2	169832362	A	G	5	rs66491446+rs934197+rs4299376+rs1260326+rs150474434+rs17050272	38.5346	TRUE	nonHDL	15.6756	TRUE	Total.Cholesterol.Minus.HDL.C	21.3506	TRUE	Phospholipids.in.IDL	3.42587	FALSE	0.3	21.3506	TRUE	Phospholipids.in.IDL	25.6213	TRUE	Phospholipids.in.IDL / Albumin	4.44399	TRUE	0.35	11.7351	Free cholesterol to total lipids ratio in small HDL	11.7351	Free.Cholesterol.in.Small.HDL / Total.Lipids.in.Small.HDL	5.67499	0
19:33896432:A:C	524	2359	PEPD	r2 = 0.897 with rs7256564	FALSE	FALSE	FALSE	FALSE	FALSE	FALSE	FALSE	FALSE	.	not annotated	0.33233	rs4805881	19	33896432	C	A	5	rs4805881+rs429358+rs116843064+rs367070+rs56322906+rs34514836	38.4976	TRUE	HDL	6.93922	FALSE	HDL.Cholesterol	13.1846	TRUE	Triglycerides.in.Small.LDL	.	.	.	15.2741	TRUE	Triglycerides to total lipids ratio in small HDL	19.6015	TRUE	Triglycerides.in.Small.LDL / Monounsaturated.Fatty.Acids	.	.	.	11.5421	Free cholesterol to total lipids ratio in large LDL	14.3213	Free.Cholesterol.in.Small.HDL / Total.Concentration.of.Lipoprotein.Particles	6.24536	2.08951
22:38599978:G:A	525	2594	MAFF,PLA2G6	r2 = 1 with rs4820325	FALSE	FALSE	FALSE	FALSE	FALSE	FALSE	FALSE	FALSE	.	not annotated	0.418105	rs4820325	22	38599978	A	G	1	rs4820325+rs2070512	38.4597	TRUE	HDL	10.4805	TRUE	HDL.Cholesterol	18.9746	TRUE	Creatinine	.	.	.	19.1147	TRUE	Triglycerides to total lipids ratio in small HDL	23.0989	TRUE	Triglycerides.in.Very.Small.VLDL / Glycoprotein.Acetyls	.	.	.	15.1042	Cholesterol to total lipids ratio in IDL	17.1955	Cholesteryl.Esters.in.Very.Small.VLDL / Cholesterol.in.Very.Small.VLDL	8.49409	0.140118
11:18643559:G:A	526	1504	SPTY2D1	r2 = 0.999 with rs10832956	FALSE	FALSE	FALSE	FALSE	FALSE	FALSE	FALSE	FALSE	.	not annotated	0.25693	rs10832954	11	18643559	A	G	5	rs10832954+rs964184+rs174564+rs74612335+rs7930518+rs116987336	38.3635	TRUE	TC	12.6747	TRUE	Total.Cholesterol	13.9268	TRUE	Concentration.of.Large.LDL.Particles	.	.	.	13.9268	TRUE	Concentration.of.Large.LDL.Particles	20.02	TRUE	Albumin / Total.Cholesterol	.	.	.	4.98549	Free cholesterol to total lipids ratio in small HDL	7.97682	Albumin / Sphingomyelins	1.25209	0
9:15304782:C:A	527	1299	TTC39B	r2 = 1 with rs686030	FALSE	FALSE	FALSE	FALSE	FALSE	FALSE	FALSE	FALSE	.	not annotated	0.140941	rs686030	9	15304782	A	C	4	rs686030+rs2519093+rs2740488+rs12551960+rs13289095	38.3458	TRUE	TC	8.56011	TRUE	Total.Cholesterol	49.7862	TRUE	Concentration.of.Very.Large.HDL.Particles	.	.	.	80.832	TRUE	Free cholesterol to total lipids ratio in small HDL	104.177	TRUE	Triglycerides.in.Very.Large.HDL / Phospholipids.in.Very.Small.VLDL	.	.	.	66.2741	Phospholipids to total lipids ratio in large LDL	66.2741	Phospholipids.in.Large.LDL / Total.Lipids.in.Large.LDL	41.2261	31.0458
4:89730074:C:T	528	671	FAM13A	r2 = 0.991 with rs6824451	FALSE	FALSE	FALSE	FALSE	FALSE	FALSE	FALSE	FALSE	.	not annotated	0.539664	rs2167750	4	89730074	T	C	1	rs2167750+rs13107325	38.2749	TRUE	HDL	6.40328	FALSE	HDL.Cholesterol	9.63924	TRUE	Cholesteryl.Esters.in.Large.HDL	.	.	.	9.7601	TRUE	Triglycerides to total lipids ratio in large HDL	14.2702	TRUE	Triglycerides.in.Small.HDL / Monounsaturated.Fatty.Acids	.	.	.	4.66562	Free cholesterol to total lipids ratio in large LDL	11.416	Free.Cholesterol.in.Small.HDL / Total.Concentration.of.Lipoprotein.Particles	3.23596	0.120861
1:110470764:G:A	529	167	CSF1	r2 = 1 with rs333947	FALSE	FALSE	FALSE	FALSE	FALSE	FALSE	FALSE	FALSE	.	not annotated	0.849849	rs333947	1	110470764	A	G	7	rs333947+rs10127775+rs3768321+rs646776+rs75460349+rs2642438+rs4847419+rs1689797	38.2741	TRUE	HDL	14.2039	TRUE	HDL.Cholesterol	14.8457	TRUE	Concentration.of.Large.HDL.Particles	.	.	.	16.4661	TRUE	Free cholesterol to total lipids ratio in medium HDL	16.9925	TRUE	Cholesterol.in.Large.HDL / Acetone	.	.	.	7.32669	Free cholesterol to total lipids ratio in small HDL	8.8053	Triglycerides.in.Small.HDL / Saturated.Fatty.Acids	0.64173	1.62046
12:4384844:T:G	530	1645	CCND2-AS2,CCND2,CCND2-AS1	primary	TRUE	TRUE	TRUE	TRUE	TRUE	TRUE	FALSE	FALSE	.	.	0.984639	rs76895963	12	4384844	G	T	4	rs76895963+rs1169288+rs3184504+rs4883201+rs28866344	38.1549	TRUE	TC	8.42028	TRUE	Total.Cholesterol	19.142	TRUE	Total.Fatty.Acids	0.636654	FALSE	0.32	19.142	TRUE	Total.Fatty.Acids	19.7908	TRUE	Triglycerides.in.Medium.LDL / Creatinine	1.25909	FALSE	0.47	4.79429	Cholesterol to total lipids ratio in large HDL	11.7899	Free.Cholesterol.in.Medium.HDL / Cholesteryl.Esters.in.HDL	10.7217	0
16:53806453:A:G	531	1974	FTO	r2 = 0.957 with rs62033400	FALSE	FALSE	FALSE	FALSE	FALSE	FALSE	FALSE	FALSE	.	not annotated	0.596996	rs56094641	16	53806453	G	A	5	rs56094641+rs183130+rs55781197+rs2925979+rs560117104+rs571298027	37.983	TRUE	HDL	3.0295	FALSE	HDL.Cholesterol	7.9031	FALSE	Tyrosine	.	.	.	7.9031	FALSE	Tyrosine	11.5388	TRUE	Albumin / Tyrosine	.	.	.	2.56019	Phospholipids to total lipids ratio in very small VLDL	6.82301	Polyunsaturated.Fatty.Acids / Total.Phospholipids.in.Lipoprotein.Particles	4.8736	0
16:68685128:G:A	532	2009	CDH3,RP11-615I2.3	lead SNP monomorphic	FALSE	FALSE	FALSE	FALSE	FALSE	FALSE	FALSE	FALSE	.	not annotated	1	rs564672295	16	68685128	A	G	3	rs564672295+rs5471+rs34065661+rs35673026	37.9393	TRUE	TC	.	.	.	.	.	.	.	.	.	.	.	.	.	.	.	.	.	.	.	.	.	.	.	.
4:75416194:T:C	533	653	AREG-AC142293.3,AC142293.3	r2 = 1 with rs189087436	FALSE	FALSE	FALSE	FALSE	FALSE	FALSE	FALSE	FALSE	.	not annotated	0.99985	rs189087436	4	75416194	C	T	6	rs189087436+rs573930512+rs537526354+rs34707604+rs13108218+rs6054+rs938075289	37.8996	TRUE	nonHDL	0.166581	FALSE	Total.Cholesterol.Minus.HDL.C	1.43525	FALSE	Glycine	.	.	.	1.85262	FALSE	Cholesterol to total lipids ratio in small LDL	2.91651	FALSE	Concentration.of.Medium.LDL.Particles / Concentration.of.Very.Small.VLDL.Particles	.	.	.	1.50362	Cholesterol to total lipids ratio in small LDL	2.41327	Concentration.of.Medium.LDL.Particles / Concentration.of.Very.Small.VLDL.Particles	1.26867	0.417366
11:126226775:G:C	534	1632	ST3GAL4	r2 = 0.99 with rs112771035	FALSE	FALSE	FALSE	FALSE	FALSE	FALSE	FALSE	FALSE	.	not annotated	0.927619	rs73632737	11	126226775	C	G	8	rs73632737+rs964184+rs192489212+rs174564+rs10838684+rs6589939+rs11229252+rs673335+rs56271783	37.8827	TRUE	HDL	12.9758	TRUE	HDL.Cholesterol	37.3313	TRUE	Concentration.of.IDL.Particles	.	.	.	41.3164	TRUE	Inverse Ratio of apolipoprotein B to apolipoprotein A1	59.0595	TRUE	Phospholipids.in.Large.LDL / Total.Esterified.Cholesterol	.	.	.	24.6292	Triglycerides to total lipids ratio in large VLDL	42.3807	Sphingomyelins / Free.Cholesterol.in.HDL	24.3555	3.98508
8:126507389:C:A	535	1277	RP11-136O12.2	r2 = 1 with rs2954038	FALSE	FALSE	FALSE	FALSE	FALSE	FALSE	FALSE	FALSE	.	not annotated	0.299993	rs2954038	8	126507389	A	C	1	rs2954038+rs2119690	37.8416	TRUE	logTG	169.136	TRUE	Total.Triglycerides	204.944	TRUE	Triglycerides.in.Very.Small.VLDL	.	.	.	204.944	TRUE	Triglycerides.in.Very.Small.VLDL	217.295	TRUE	Triglycerides.in.Very.Small.VLDL / Citrate	.	.	.	136.445	Cholesteryl esters to total lipids ratio in medium HDL	161.989	Cholesteryl.Esters.in.Medium.HDL / Concentration.of.Medium.HDL.Particles	35.8078	0
1:54872512:.:.	536	59	.	lead SNP not available	FALSE	FALSE	FALSE	FALSE	FALSE	FALSE	FALSE	FALSE	.	not annotated	.	rs2	1	54872512	.	.	.	.	37.8297	TRUE	TC	.	.	.	.	.	.	.	.	.	.	.	.	.	.	.	.	.	.	.	.	.	.	.	.
11:116662579:C:T	537	1597	.	duplicate model	FALSE	FALSE	FALSE	FALSE	FALSE	FALSE	FALSE	FALSE	.	not annotated	.	rs651821	11	116662579	T	C	.	.	37.7381	TRUE	TC	.	.	.	.	.	.	.	.	.	.	.	.	.	.	.	.	.	.	.	.	.	.	.	.
17:4692640:G:T	538	2078	VMO1,GLTPD2	r2 = 1 with rs79202680	FALSE	FALSE	FALSE	FALSE	FALSE	FALSE	FALSE	FALSE	.	not annotated	0.995337	rs79202680	17	4692640	T	G	5	rs79202680+rs77542162+rs186021206+rs11869730+rs11657987+rs8178824	37.7352	TRUE	TC	2.90018	FALSE	Total.Cholesterol	26.2875	TRUE	Triglycerides.in.IDL	.	.	.	26.2875	TRUE	Triglycerides.in.IDL	38.7388	TRUE	Triglycerides.in.Large.LDL / Total.Fatty.Acids	.	.	.	11.23	Cholesterol to total lipids ratio in IDL	16.0487	Total.Lipids.in.Large.VLDL / Concentration.of.Large.VLDL.Particles	23.3873	0
5:55861464:C:T	539	733	AC022431.2	r2 = 1 with rs28650790	FALSE	FALSE	FALSE	FALSE	FALSE	FALSE	FALSE	FALSE	.	not annotated	0.809159	rs28650790	5	55861464	T	C	0	rs28650790	37.7327	TRUE	HDL	22.0765	TRUE	HDL.Cholesterol	46.4152	TRUE	Phospholipids.in.Large.VLDL	.	.	.	46.4152	TRUE	Phospholipids.in.Large.VLDL	53.8743	TRUE	Free.Cholesterol.in.Large.VLDL / Glycoprotein.Acetyls	.	.	.	24.2739	Free cholesterol to total lipids ratio in large LDL	47.5607	Free.Cholesterol.in.Small.HDL / Concentration.of.HDL.Particles	24.3387	0
19:8945880:A:G	540	2276	CTD-2529P6.4,ZNF558,MBD3L1	r2 = 1 with rs555628099	FALSE	FALSE	FALSE	FALSE	FALSE	FALSE	FALSE	FALSE	.	not annotated	0.995801	rs555628099	19	8945880	G	A	16	rs555628099+rs429358+rs116843064+rs367070+rs56322906+rs34514836+rs4805881+rs28873836+rs12609461+rs12975319+rs2289863+rs112659531+rs3112494+rs56254331+rs4760+rs141226346+rs10853981	37.6635	TRUE	HDL	0.0660714	FALSE	HDL.Cholesterol	1.09487	FALSE	Degree.of.Unsaturation	.	.	.	1.24648	FALSE	Ratio of monounsaturated fatty acids to total fatty acids	1.64896	FALSE	Triglycerides.in.Very.Large.HDL / Omega.3.Fatty.Acids	.	.	.	0.813449	Free cholesterol to total lipids ratio in small LDL	0.864951	Triglycerides.in.Very.Large.HDL / Omega.3.Fatty.Acids	1.0288	0.15161
19:49259529:A:G	541	2438	FUT1,FGF21	primary	TRUE	TRUE	TRUE	TRUE	TRUE	TRUE	FALSE	TRUE	FGF21	liver-specific cytokine involved in major aspects of hepatic steatosis; controls circulating lipid levels; stimulates glucose uptake in differentiated adipocytes via the induction of glucose transporter SLC2A1/GLUT1 expression	0.448035	rs838133	19	49259529	G	A	4	rs838133+rs483082+rs116843064+rs58542926+rs4804414	37.6271	TRUE	logTG	14.0053	TRUE	Total.Triglycerides	35.4722	TRUE	Concentration.of.Very.Small.VLDL.Particles	7.79257	TRUE	0.74	35.4722	TRUE	Concentration.of.Very.Small.VLDL.Particles	56.1874	TRUE	Concentration.of.Very.Small.VLDL.Particles / Valine	10.9727	TRUE	1	10.2389	Cholesteryl esters to total lipids ratio in medium HDL	26.277	Valine / Saturated.Fatty.Acids	21.4668	0
9:19267440:C:T	542	1306	DENND4C	r2 = 0.987 with rs34150222	FALSE	FALSE	FALSE	FALSE	FALSE	FALSE	FALSE	FALSE	.	not annotated	0.923893	rs12551960	9	19267440	T	C	2	rs12551960+rs2519093+rs2740488	37.5768	TRUE	TC	5.62117	FALSE	Total.Cholesterol	7.40979	FALSE	Cholesteryl.Esters.in.Very.Small.VLDL	.	.	.	7.45471	FALSE	Phospholipids to total lipids ratio in medium VLDL	10.6455	FALSE	Triglycerides.in.Small.HDL / VLDL.Cholesterol	.	.	.	5.71033	Free cholesterol to total lipids ratio in very large VLDL	9.00561	Triglycerides.in.Small.HDL / Phospholipids.in.VLDL	1.78861	0.0449232
14:94847262:T:A	543	1873	SERPINA1	primary	TRUE	TRUE	TRUE	TRUE	TRUE	TRUE	TRUE	TRUE	SERPINA1	depletes lipid raft cholesterol	0.951746	rs17580	14	94847262	A	T	1	rs17580+rs11621792	37.4908	TRUE	LDL	10.3672	TRUE	Clinical.LDL.Cholesterol	101.453	TRUE	Albumin	9.37834	TRUE	1	101.453	TRUE	Albumin	104.507	TRUE	Albumin / Average.Diameter.for.HDL.Particles	9.7975	TRUE	1	13.3777	Phospholipids to total lipids ratio in small HDL	31.0182	Total.Lipids.in.Small.LDL / Glycoprotein.Acetyls	91.0857	0
5:158011435:G:C	544	812	RP11-32D16.1-EBF1	primary	TRUE	TRUE	TRUE	TRUE	TRUE	FALSE	FALSE	FALSE	.	.	0.767451	rs2914231	5	158011435	C	G	2	rs2914231+rs6882076+rs28650790	37.3872	TRUE	logTG	9.46879	TRUE	Total.Triglycerides	9.91343	TRUE	Triglycerides.in.Very.Large.VLDL	1.17595	FALSE	0.09	11.2941	TRUE	Cholesteryl esters to total lipids ratio in medium VLDL	13.4032	TRUE	Triglycerides.in.Small.LDL / Monounsaturated.Fatty.Acids	2.04636	FALSE	0.21	8.22295	Free cholesterol to total lipids ratio in large LDL	9.74925	Cholesteryl.Esters.in.Medium.VLDL / Cholesterol.in.Medium.VLDL	0.444634	1.38062
6:100602753:G:A	545	943	PRDX2P4-RP3-344J20.1	r2 = 0.989 with rs17789218	FALSE	FALSE	FALSE	FALSE	FALSE	FALSE	FALSE	FALSE	.	not annotated	0.758153	rs9496567	6	100602753	A	G	10	rs9496567+rs10455872+rs6689+rs2235215+rs80215559+rs9402685+rs78425119+rs3800461+rs6457374+rs1338667+rs622871	37.3645	TRUE	TC	9.48931	TRUE	Total.Cholesterol	13.4934	TRUE	Concentration.of.Very.Small.VLDL.Particles	.	.	.	13.4934	TRUE	Concentration.of.Very.Small.VLDL.Particles	18.3532	TRUE	Total.Lipids.in.Small.VLDL / Valine	.	.	.	4.34324	Cholesteryl esters to total lipids ratio in medium HDL	7.01508	Cholesterol.in.Very.Large.HDL / Concentration.of.Very.Large.HDL.Particles	4.00411	0
8:145051484:C:T	546	1285	PARP10,PLEC	primary	TRUE	TRUE	TRUE	TRUE	TRUE	TRUE	TRUE	FALSE	.	.	0.631983	rs1134030	8	145051484	T	C	7	rs1134030+rs28601761+rs9297994+rs15285+rs4841132+rs1495741+rs2721961+rs9298506	37.3429	TRUE	nonHDL	13.8564	TRUE	Total.Cholesterol.Minus.HDL.C	19.3734	TRUE	Cholesteryl.Esters.in.Medium.VLDL	6.71594	TRUE	0.17	19.3734	TRUE	Cholesteryl.Esters.in.Medium.VLDL	22.4677	TRUE	Triglycerides.in.Small.HDL / Cholesteryl.Esters.in.Small.VLDL	7.54198	TRUE	0.23	10.645	Free cholesterol to total lipids ratio in small HDL	17.0118	Triglycerides.in.Small.HDL / Total.Lipids.in.Small.VLDL	5.51696	0
6:43757896:C:A	547	925	VEGFA-RP11-344J7.2,VEGFA	r2 = 1 with rs998584	FALSE	FALSE	FALSE	FALSE	FALSE	FALSE	FALSE	FALSE	.	not annotated	0.518765	rs998584	6	43757896	A	C	5	rs998584+rs10455872+rs6689+rs78425119+rs2235215+rs80215559	37.3391	TRUE	nonHDL	5.453	FALSE	Total.Cholesterol.Minus.HDL.C	32.888	TRUE	Average.Diameter.for.VLDL.Particles	.	.	.	34.5024	TRUE	Inverse Ratio of triglycerides to phosphoglycerides	43.8191	TRUE	Free.Cholesterol.in.Small.HDL / Total.Concentration.of.Lipoprotein.Particles	.	.	.	19.1064	Free cholesterol to total lipids ratio in large LDL	40.7096	Free.Cholesterol.in.Small.HDL / Total.Concentration.of.Lipoprotein.Particles	27.435	1.6144
2:121306440:G:A	548	433	.	duplicate model	FALSE	FALSE	FALSE	FALSE	FALSE	FALSE	FALSE	FALSE	.	not annotated	.	rs17050272	2	121306440	A	G	.	.	37.3382	TRUE	nonHDL	.	.	.	.	.	.	.	.	.	.	.	.	.	.	.	.	.	.	.	.	.	.	.	.
11:18645668:T:C	549	1505	SPTY2D1	primary	TRUE	TRUE	TRUE	TRUE	TRUE	FALSE	FALSE	FALSE	.	.	0.257069	rs10832956	11	18645668	C	T	3	rs10832956+rs174547+rs964184+rs112771035	37.295	TRUE	LDL	11.5509	TRUE	Clinical.LDL.Cholesterol	13.8935	TRUE	Concentration.of.Large.LDL.Particles	2.25341	FALSE	0.15	13.8935	TRUE	Concentration.of.Large.LDL.Particles	20.0061	TRUE	Albumin / Total.Cholesterol	4.64264	TRUE	0.26	4.97838	Free cholesterol to total lipids ratio in small HDL	8.04092	Albumin / Sphingomyelins	2.34256	0
6:42940810:T:C	550	918	PEX6	primary	TRUE	TRUE	TRUE	TRUE	TRUE	TRUE	TRUE	FALSE	.	.	0.459047	rs9296406	6	42940810	C	T	6	rs9296406+rs41272086+rs998584+rs2263329+rs17585887+rs72959041+rs76716928	37.279	TRUE	HDL	9.08179	TRUE	HDL.Cholesterol	25.6152	TRUE	Phospholipids.in.Medium.HDL	10.2558	TRUE	0.71	29.805	TRUE	Inverse Ratio of apolipoprotein B to apolipoprotein A1	56.25	TRUE	Triglycerides.in.Medium.HDL / Triglycerides.in.Very.Small.VLDL	14.4889	TRUE	1	15.3442	Free cholesterol to total lipids ratio in small HDL	49.9216	Triglycerides.in.Medium.HDL / Triglycerides.in.Very.Small.VLDL	16.5334	4.18979
3:32514647:T:A	551	512	CMTM7	r2 = 1 with rs9837622	FALSE	FALSE	FALSE	FALSE	FALSE	FALSE	FALSE	FALSE	.	not annotated	0.925995	rs9837622	3	32514647	A	T	3	rs9837622+rs13076933+rs9844432+rs77682405	37.1451	TRUE	TC	7.92829	FALSE	Total.Cholesterol	14.4024	TRUE	Cholesteryl.Esters.in.Medium.VLDL	.	.	.	14.4024	TRUE	Cholesteryl.Esters.in.Medium.VLDL	16.2578	TRUE	Cholesteryl.Esters.in.Medium.VLDL / Albumin	.	.	.	5.06812	Phospholipids to total lipids ratio in small HDL	11.6043	Concentration.of.HDL.Particles / Total.Concentration.of.Lipoprotein.Particles	6.47412	0
15:58722590:G:GC	552	1917	RP11-355N15.1,LIPC,ALDH1A2	r2 = 0.956 with rs1077835	FALSE	FALSE	FALSE	FALSE	FALSE	FALSE	FALSE	FALSE	.	not annotated	0.788888	rs35980001	15	58722590	GC	G	0	rs35980001	37.0042	TRUE	logTG	39.0985	TRUE	Total.Triglycerides	1836.95	TRUE	Triglycerides.in.Large.HDL	.	.	.	1836.95	TRUE	Triglycerides.in.Large.HDL	2343.14	TRUE	Free.Cholesterol.in.Small.HDL / Concentration.of.Small.HDL.Particles	.	.	.	1339.71	Free cholesterol to total lipids ratio in small HDL	2219.6	Free.Cholesterol.in.Small.HDL / Concentration.of.Small.HDL.Particles	1797.85	0
17:76393896:C:A	553	2200	PGS1,SNORA30	primary	TRUE	TRUE	TRUE	TRUE	TRUE	TRUE	TRUE	FALSE	.	.	0.398055	rs7212201	17	76393896	A	C	3	rs7212201+rs72836561+rs79202680+rs11656743	36.9914	TRUE	logTG	11.3835	TRUE	Total.Triglycerides	24.2433	TRUE	Cholesteryl.Esters.in.Medium.HDL	3.05688	FALSE	0.69	25.8069	TRUE	Cholesteryl esters to total lipids ratio in medium VLDL	34.3468	TRUE	Concentration.of.Small.LDL.Particles / Phospholipids.in.Large.LDL	6.15362	TRUE	0.97	22.1574	Free cholesterol to total lipids ratio in small VLDL	27.1583	Total.Lipids.in.Small.LDL / Phospholipids.in.LDL	12.8598	1.5636
14:94847262:T:A	554	1875	.	duplicate model	FALSE	FALSE	FALSE	FALSE	FALSE	FALSE	FALSE	FALSE	.	not annotated	.	rs17580	14	94847262	A	T	.	.	36.9788	TRUE	TC	.	.	.	.	.	.	.	.	.	.	.	.	.	.	.	.	.	.	.	.	.	.	.	.
14:24871926:C:T	555	1837	.	duplicate model	FALSE	FALSE	FALSE	FALSE	FALSE	FALSE	FALSE	FALSE	.	not annotated	.	rs11621792	14	24871926	T	C	.	.	36.9485	TRUE	TC	.	.	.	.	.	.	.	.	.	.	.	.	.	.	.	.	.	.	.	.	.	.	.	.
7:1102674:C:T	556	1032	RP11-449P15.1,C7orf50,GPR146	primary	TRUE	TRUE	FALSE	TRUE	TRUE	TRUE	TRUE	FALSE	.	.	0.875062	rs34409228	7	1102674	T	C	4	rs34409228+rs55747707+rs11762784+rs79949326+rs10242866	36.8861	TRUE	HDL	4.72327	FALSE	HDL.Cholesterol	22.7663	TRUE	Triglycerides.in.Large.HDL	3.41716	FALSE	0.75	22.7663	TRUE	Triglycerides.in.Large.HDL	32.751	TRUE	Concentration.of.Small.LDL.Particles / Free.Cholesterol.in.Very.Small.VLDL	3.7875	FALSE	0.94	15.8164	Free cholesterol to total lipids ratio in small HDL	26.4414	Cholesterol.in.Small.LDL / Total.Cholesterol.Minus.HDL.C	18.0431	0
13:32976656:GC:G	557	1802	N4BP2L1,BRCA2	primary	TRUE	TRUE	TRUE	TRUE	TRUE	TRUE	FALSE	FALSE	.	.	0.518606	rs368213791	13	32976656	G	GC	0	rs368213791	36.5853	TRUE	LDL	19.7294	TRUE	Clinical.LDL.Cholesterol	26.9092	TRUE	Concentration.of.Large.LDL.Particles	6.57603	TRUE	NA	26.9092	TRUE	Concentration.of.Large.LDL.Particles	30.2199	TRUE	Concentration.of.Large.LDL.Particles / Glycoprotein.Acetyls	6.26056	TRUE	NA	21.1111	Free cholesterol to total lipids ratio in small HDL	21.8212	Free.Cholesterol.in.Small.HDL / Phospholipids.in.Small.HDL	7.17979	0
1:55509585:C:T	558	68	PCSK9	lead SNP monomorphic	FALSE	FALSE	FALSE	FALSE	FALSE	FALSE	FALSE	FALSE	.	not annotated	1	rs151193009	1	55509585	T	C	1	rs151193009+rs602633	36.5768	TRUE	LDL	.	.	.	.	.	.	.	.	.	.	.	.	.	.	.	.	.	.	.	.	.	.	.	.
10:71094504:T:C	559	1415	HK1	r2 = 1 with rs17476364	FALSE	FALSE	FALSE	FALSE	FALSE	FALSE	FALSE	FALSE	.	not annotated	0.890504	rs17476364	10	71094504	C	T	4	rs17476364+rs2792751+rs7903402+rs7904973+rs2068888	36.5654	TRUE	TC	18.3861	TRUE	Total.Cholesterol	18.546	TRUE	Total.Esterified.Cholesterol	.	.	.	18.546	TRUE	Total.Esterified.Cholesterol	27.9118	TRUE	Cholesterol.in.Large.LDL / Pyruvate	.	.	.	4.89948	Free cholesterol to total lipids ratio in medium HDL	11.8198	Cholesteryl.Esters.in.Medium.LDL / Pyruvate	0.15993	0
7:72364415:G:T	560	1086	POM121	MAF<1%	FALSE	FALSE	FALSE	FALSE	FALSE	FALSE	FALSE	FALSE	.	not annotated	0.991508	rs150383903	7	72364415	T	G	13	rs150383903+rs17725246+rs55696093+rs799157+rs4722551+rs564449+rs13228906+rs12533280+rs10272002+rs6967728+rs2302434+rs4374942+rs4410790+rs7808613	36.4789	TRUE	nonHDL	0.032345	FALSE	Total.Cholesterol.Minus.HDL.C	1.68345	FALSE	Lactate	.	.	.	1.68345	FALSE	Lactate	2.39447	FALSE	Cholesteryl.Esters.in.Small.HDL / Lactate	.	.	.	0.628299	Ratio of saturated fatty acids to total fatty acids	1.98025	Cholesteryl.Esters.in.Medium.LDL / Free.Cholesterol.in.Small.VLDL	1.65111	0
12:125265201:G:A	561	1778	SCARB1	primary	TRUE	TRUE	FALSE	TRUE	TRUE	TRUE	TRUE	TRUE	SCARB1	mediates cholesterol transfer to and from HDL.	0.323617	rs921919	12	125265201	A	G	6	rs921919+rs1169288+rs3184504+rs4883201+rs28866344+rs76895963+rs888192	36.3363	TRUE	TC	4.82577	FALSE	Total.Cholesterol	63.3456	TRUE	Average.Diameter.for.HDL.Particles	9.92111	TRUE	1	63.3456	TRUE	Average.Diameter.for.HDL.Particles	66.0111	TRUE	Concentration.of.Large.HDL.Particles / Albumin	11.147	TRUE	1	23.8453	Phospholipids to total lipids ratio in small HDL	49.9531	Phospholipids.in.LDL / Total.Cholesterol	58.5198	0
10:94839642:G:A	562	1435	CYP26A1,CYP26A1-NIP7P1	r2 = 0.997 with rs4418728	FALSE	FALSE	FALSE	FALSE	FALSE	FALSE	FALSE	FALSE	.	not annotated	0.5525	rs2068888	10	94839642	A	G	3	rs2068888+rs2792751+rs7903402+rs7904973	36.3279	TRUE	TC	5.77448	FALSE	Total.Cholesterol	30.0084	TRUE	Concentration.of.Small.VLDL.Particles	.	.	.	30.0084	TRUE	Concentration.of.Small.VLDL.Particles	47.4576	TRUE	Total.Lipids.in.Small.VLDL / Citrate	.	.	.	14.7207	Cholesterol to total lipids ratio in medium HDL	28.416	Phosphoglycerides / Free.Cholesterol.in.HDL	24.2339	0
8:126492927:A:C	563	1271	RP11-136O12.2	MAF<1%	FALSE	FALSE	FALSE	FALSE	FALSE	FALSE	FALSE	FALSE	.	not annotated	0.994235	rs55748921	8	126492927	C	A	1	rs55748921+rs145391587	36.3152	TRUE	logTG	0.963981	FALSE	Total.Triglycerides	2.08513	FALSE	Glucose	.	.	.	2.79168	FALSE	Phospholipids to total lipids ratio in small LDL	3.91787	FALSE	Total.Lipids.in.Very.Large.VLDL / Cholesterol.in.Chylomicrons.and.Extremely.Large.VLDL	.	.	.	2.59701	Phospholipids to total lipids ratio in small LDL	2.59701	Phospholipids.in.Small.LDL / Total.Lipids.in.Small.LDL	1.12114	0.706553
8:8577883:C:T	564	1143	CLDN23-RP11-211C9.1,RP11-211C9.1	primary	TRUE	TRUE	FALSE	FALSE	TRUE	FALSE	FALSE	FALSE	.	.	0.749804	rs13256216	8	8577883	T	C	12	rs13256216+rs28601761+rs9987289+rs9297994+rs2737245+rs11787335+rs9298506+rs1495741+rs117139027+rs900776+rs62509311+rs4645567+rs2928576	36.2676	TRUE	LDL	4.32126	FALSE	Clinical.LDL.Cholesterol	8.79418	FALSE	Free.Cholesterol.in.IDL	.	.	.	11.4579	TRUE	Free cholesterol to total lipids ratio in large HDL	13.7486	TRUE	Free.Cholesterol.in.IDL / Creatinine	2.06464	FALSE	0.07	9.13181	Triglycerides to total lipids ratio in very small VLDL	9.92148	Concentration.of.Small.VLDL.Particles / Cholesteryl.Esters.in.VLDL	4.47292	2.66372
2:62988169:G:T	565	391	EHBP1	r2 = 1 with rs4671050	FALSE	FALSE	FALSE	FALSE	FALSE	FALSE	FALSE	FALSE	.	not annotated	0.687437	rs4671050	2	62988169	T	G	7	rs4671050+rs934197+rs4299376+rs1260326+rs150474434+rs17050272+rs66491446+rs907866	36.1302	TRUE	nonHDL	15.6533	TRUE	Total.Cholesterol.Minus.HDL.C	21.0434	TRUE	Cholesteryl.Esters.in.Medium.VLDL	.	.	.	21.0434	TRUE	Cholesteryl.Esters.in.Medium.VLDL	23.3393	TRUE	Cholesteryl.Esters.in.Small.HDL / Cholesteryl.Esters.in.Medium.VLDL	.	.	.	9.87106	Phospholipids to total lipids ratio in very large VLDL	16.3833	Concentration.of.HDL.Particles / Total.Concentration.of.Lipoprotein.Particles	5.39	0
8:121867780:T:C	566	1256	RP11-713M15.2-RP11-369K17.1	primary	TRUE	TRUE	TRUE	TRUE	TRUE	TRUE	FALSE	FALSE	.	.	0.317496	rs10955991	8	121867780	C	T	5	rs10955991+rs15285+rs9987289+rs2954038+rs3808460+rs7817574	36.055	TRUE	HDL	10.8116	TRUE	HDL.Cholesterol	10.8116	TRUE	HDL.Cholesterol	3.43207	FALSE	0.1	10.935	TRUE	Free cholesterol to total lipids ratio in medium HDL	15.578	TRUE	Cholesteryl.Esters.in.Small.VLDL / Phospholipids.in.Small.VLDL	5.37761	TRUE	0.47	10.5699	Free cholesterol to total lipids ratio in large VLDL	13.4774	Cholesteryl.Esters.in.Small.VLDL / Phospholipids.in.Small.VLDL	0	0.123365
2:234668570:C:T	567	491	UGT1A10,UGT1A1,UGT1A5,UGT1A4,UGT1A3,UGT1A9,UGT1A8,UGT1A7,UGT1A6,AC114812.5	primary	TRUE	TRUE	FALSE	FALSE	FALSE	FALSE	FALSE	FALSE	.	not annotated	0.685205	rs887829	2	234668570	T	C	8	rs887829+rs934197+rs4299376+rs1260326+rs907866+rs113867238+rs10184673+rs55938402+rs17050272	36.0477	TRUE	TC	0.888907	FALSE	Total.Cholesterol	4.60166	FALSE	Total.Lipids.in.Very.Small.VLDL	.	.	.	4.60166	FALSE	Total.Lipids.in.Very.Small.VLDL	10.3618	FALSE	Triglycerides.in.IDL / Glycoprotein.Acetyls	.	.	.	2.5652	Cholesteryl esters to total lipids ratio in small HDL	6.17552	Triglycerides.in.IDL / Glycoprotein.Acetyls	3.71275	0
17:26694861:G:A	568	2104	TMEM199,VTN,SARM1,CTB-96E2.2,CTB-96E2.3,CTB-96E2.7	r2 = 1 with rs704	FALSE	FALSE	FALSE	FALSE	FALSE	FALSE	FALSE	FALSE	.	not annotated	0.524427	rs704	17	26694861	A	G	4	rs704+rs77542162+rs186021206+rs1801689+rs12603290	36.0237	TRUE	LDL	7.42819	FALSE	Clinical.LDL.Cholesterol	33.346	TRUE	Phospholipids.in.Medium.HDL	.	.	.	42.5445	TRUE	Phospholipids to total lipids ratio in small HDL	57.453	TRUE	Phospholipids.in.Small.LDL / Polyunsaturated.Fatty.Acids	.	.	.	26.1701	Free cholesterol to total lipids ratio in very small VLDL	42.4415	Phospholipids.in.Small.LDL / Polyunsaturated.Fatty.Acids	25.9178	9.19855
12:51120202:C:T	569	1685	DIP2B	r2 = 1 with rs2250751	FALSE	FALSE	FALSE	FALSE	FALSE	FALSE	FALSE	FALSE	.	not annotated	0.653726	rs111299924	12	51120202	T	C	7	rs111299924+rs1169288+rs3184504+rs4883201+rs28866344+rs76895963+rs888192+rs921919	36.0035	TRUE	TC	10.2469	TRUE	Total.Cholesterol	11.7466	TRUE	Free.Cholesterol.in.IDL	.	.	.	11.7466	TRUE	Free.Cholesterol.in.IDL	16.0608	TRUE	Phospholipids.in.IDL / Valine	.	.	.	6.90736	Cholesteryl esters to total lipids ratio in large VLDL	8.22435	Phospholipids.in.VLDL / Total.Triglycerides	1.4997	0
19:19388500:A:T	570	2346	AC138430.4,SUGP1,TM6SF2	r2 = 0.985 with rs58542926	FALSE	FALSE	FALSE	FALSE	FALSE	FALSE	FALSE	FALSE	.	not annotated	0.923235	rs8107974	19	19388500	T	A	1	rs8107974+rs5117	35.9747	TRUE	logTG	82.8377	TRUE	Total.Triglycerides	228.852	TRUE	Omega.3.Fatty.Acids	.	.	.	228.852	TRUE	Omega.3.Fatty.Acids	256.953	TRUE	Albumin / Omega.3.Fatty.Acids	.	.	.	25.1432	Cholesteryl esters to total lipids ratio in medium HDL	82.0131	Phospholipids.in.Small.VLDL / Phospholipids.in.Medium.VLDL	146.014	0
19:52314655:G:C	571	2444	FPR3	primary	TRUE	TRUE	FALSE	FALSE	FALSE	FALSE	FALSE	FALSE	.	not annotated	0.733122	rs28873836	19	52314655	C	G	6	rs28873836+rs429358+rs116843064+rs367070+rs56322906+rs34514836+rs4805881	35.7471	TRUE	HDL	2.31742	FALSE	HDL.Cholesterol	3.12362	FALSE	Concentration.of.HDL.Particles	.	.	.	4.29974	FALSE	Phospholipids to total lipids ratio in medium HDL	9.69053	FALSE	Free.Cholesterol.in.Large.HDL / Concentration.of.Large.HDL.Particles	.	.	.	3.03214	Phospholipids to total lipids ratio in small LDL	8.11068	Free.Cholesterol.in.Large.HDL / Concentration.of.Large.HDL.Particles	0.806196	1.17612
1:23785760:C:T	572	14	ASAP3	r2 = 1 with rs7551124	FALSE	FALSE	FALSE	FALSE	FALSE	FALSE	FALSE	FALSE	.	not annotated	0.125089	rs7551124	1	23785760	T	C	10	rs7551124+rs12740374+rs11591147+rs11207980+rs2587534+rs35148262+rs2642438+rs557402933+rs186538116+rs4970705+rs114165349	35.7122	TRUE	TC	6.72033	FALSE	Total.Cholesterol	9.17424	FALSE	Total.Lipids.in.Lipoprotein.Particles	.	.	.	9.17424	FALSE	Total.Lipids.in.Lipoprotein.Particles	11.4019	FALSE	Phospholipids.in.Small.LDL / Free.Cholesterol.in.Medium.VLDL	.	.	.	3.20921	Phospholipids to total lipids ratio in small LDL	6.73759	Free.Cholesterol.in.Very.Large.HDL / Concentration.of.Very.Large.HDL.Particles	2.45391	0
1:55505647:G:T	573	65	PCSK9	primary	TRUE	TRUE	TRUE	TRUE	TRUE	TRUE	FALSE	TRUE	PCSK9	binds LDLRs to promote their degradation	0.982496	rs11591147	1	55505647	T	G	1	rs11591147+rs660240	35.6655	TRUE	LDL	318.877	TRUE	Clinical.LDL.Cholesterol	387.409	TRUE	Cholesteryl.Esters.in.Medium.VLDL	47.1418	TRUE	1	387.409	TRUE	Cholesteryl.Esters.in.Medium.VLDL	460.137	TRUE	Concentration.of.Small.HDL.Particles / Phospholipids.in.Large.LDL	57.9208	TRUE	1	182.501	Triglycerides to total lipids ratio in small VLDL	276.899	Triglycerides.in.Small.VLDL / Phospholipids.in.VLDL	68.5324	0
12:109995097:A:G	574	1734	MMAB	primary	TRUE	TRUE	TRUE	TRUE	TRUE	TRUE	TRUE	TRUE	MVK	catalyzes the phosphorylation of mevalonate to mevalonate 5- phosphate, a key step in isoprenoid and cholesterol biosynthesis	0.476627	rs888192	12	109995097	G	A	5	rs888192+rs1169288+rs3184504+rs4883201+rs28866344+rs76895963	35.6576	TRUE	TC	8.7514	TRUE	Total.Cholesterol	29.0595	TRUE	Free.Cholesterol.in.HDL	5.7928	TRUE	0.73	29.0595	TRUE	Free.Cholesterol.in.HDL	34.2802	TRUE	Degree.of.Unsaturation / Free.Cholesterol.in.HDL	6.13933	TRUE	0.89	8.12219	Phospholipids to total lipids ratio in large LDL	20.5241	Free.Cholesterol.in.Medium.LDL / Cholesterol.in.Large.LDL	20.3081	0
3:132183991:G:A	575	558	DNAJC13	primary	TRUE	TRUE	TRUE	TRUE	TRUE	FALSE	FALSE	TRUE	ACAD11	Acyl-CoA dehydrogenase, exhibits maximal activity towards saturated C22-CoA. Probably participates to beta-oxydation and energy production	0.944669	rs74341202	3	132183991	A	G	3	rs74341202+rs13076933+rs71311871+rs9837622	35.6326	TRUE	LDL	11.0478	TRUE	Clinical.LDL.Cholesterol	14.4412	TRUE	Free.Cholesterol.in.IDL	4.98511	TRUE	0.05	14.4412	TRUE	Free.Cholesterol.in.IDL	22.6581	TRUE	Albumin / Sphingomyelins	8.99839	TRUE	0.46	6.3639	Cholesterol to total lipids ratio in large VLDL	10.9447	Albumin / Sphingomyelins	3.39343	0
8:9184691:T:C	576	1156	RP11-115J16.1	r2 = 0.872 with rs111675407	FALSE	FALSE	FALSE	FALSE	FALSE	FALSE	FALSE	FALSE	.	not annotated	0.102642	rs6601299	8	9184691	C	T	1	rs6601299+rs3208305	35.5436	TRUE	HDL	75.3516	TRUE	HDL.Cholesterol	135.501	TRUE	Glycine	.	.	.	135.501	TRUE	Glycine	235.018	TRUE	Glycine / Cholesteryl.Esters.in.HDL	.	.	.	45.4955	Phospholipids to total lipids ratio in very small VLDL	99.8737	Triglycerides.in.Very.Small.VLDL / Monounsaturated.Fatty.Acids	60.1497	0
6:135419688:T:C	577	977	HBS1L	r2 = 0.998 with rs7776054	FALSE	FALSE	FALSE	FALSE	FALSE	FALSE	FALSE	FALSE	.	not annotated	0.737344	rs9402685	6	135419688	C	T	6	rs9402685+rs10455872+rs6689+rs78425119+rs2235215+rs80215559+rs998584	35.3028	TRUE	nonHDL	6.29774	FALSE	Total.Cholesterol.Minus.HDL.C	23.7268	TRUE	Lactate	.	.	.	23.7268	TRUE	Lactate	75.0334	TRUE	Pyruvate / Lactate	.	.	.	4.6527	Triglycerides to total lipids ratio in small VLDL	51.3066	Pyruvate / Lactate	17.429	0
9:2640759:A:G	578	1290	RP11-125B21.2,VLDLR	r2 = 1 with rs3780181	FALSE	FALSE	FALSE	FALSE	FALSE	FALSE	FALSE	FALSE	.	not annotated	0.934791	rs3780181	9	2640759	G	A	4	rs3780181+rs2519093+rs2740488+rs13289095+rs12551960	35.2596	TRUE	LDL	6.24598	FALSE	Clinical.LDL.Cholesterol	8.0311	FALSE	Cholesteryl.Esters.in.Very.Small.VLDL	.	.	.	8.0311	FALSE	Cholesteryl.Esters.in.Very.Small.VLDL	10.0873	FALSE	Total.Lipids.in.IDL / Albumin	.	.	.	4.21151	Free cholesterol to total lipids ratio in large HDL	5.42807	Triglycerides.in.Small.HDL / Phospholipids.in.VLDL	1.78512	0
2:135954797:T:C	579	442	ZRANB3	primary	TRUE	TRUE	TRUE	TRUE	TRUE	TRUE	FALSE	FALSE	.	.	0.740164	rs1375131	2	135954797	C	T	9	rs1375131+rs934197+rs4299376+rs1260326+rs907866+rs113867238+rs10184673+rs55938402+rs17050272+rs887829	35.248	TRUE	TC	8.04574	TRUE	Total.Cholesterol	12.5128	TRUE	Docosahexaenoic.Acid	1.52567	FALSE	0.51	16.8433	TRUE	Free cholesterol to total lipids ratio in small HDL	19.0744	TRUE	Tyrosine / Docosahexaenoic.Acid	6.29127	TRUE	0.7	13.955	Free cholesterol to total lipids ratio in small HDL	14.1964	Free.Cholesterol.in.Small.HDL / Phospholipids.in.Small.HDL	4.46709	4.3305
1:27021913:G:C	580	26	ARID1A,RP5-968P14.2-ARID1A,RP5-968P14.2	primary	TRUE	TRUE	FALSE	TRUE	TRUE	TRUE	TRUE	FALSE	.	.	0.976728	rs114165349	1	27021913	C	G	9	rs114165349+rs12740374+rs11591147+rs11207980+rs2587534+rs35148262+rs2642438+rs557402933+rs186538116+rs4970705	35.2418	TRUE	TC	6.07736	FALSE	Total.Cholesterol	34.3752	TRUE	Concentration.of.Small.VLDL.Particles	4.8801	TRUE	0.91	37.2392	TRUE	Inverse Ratio of apolipoprotein B to apolipoprotein A1	55.03	TRUE	Phospholipids.in.Medium.HDL / Triglycerides.in.Medium.LDL	7.04706	TRUE	1	12.5577	Inverse Ratio of apolipoprotein B to apolipoprotein A1	35.17	Phospholipids.in.Medium.HDL / Saturated.Fatty.Acids	28.2978	2.86395
9:19267440:C:T	581	1305	DENND4C	r2 = 0.987 with rs34150222	FALSE	FALSE	FALSE	FALSE	FALSE	FALSE	FALSE	FALSE	.	not annotated	0.923893	rs12551960	9	19267440	T	C	3	rs12551960+rs2519093+rs2740488+rs13289095	35.1062	TRUE	LDL	3.70266	FALSE	Clinical.LDL.Cholesterol	7.42017	FALSE	Cholesteryl.Esters.in.Very.Small.VLDL	.	.	.	7.46675	FALSE	Phospholipids to total lipids ratio in medium VLDL	10.6607	FALSE	Triglycerides.in.Small.HDL / VLDL.Cholesterol	.	.	.	5.71812	Free cholesterol to total lipids ratio in very large VLDL	9.01689	Triglycerides.in.Small.HDL / Phospholipids.in.VLDL	3.71751	0.0465793
11:117160321:C:T	582	1601	BACE1,RNF214	MAF<1%	FALSE	FALSE	FALSE	FALSE	FALSE	FALSE	FALSE	FALSE	.	not annotated	0.999915	rs202219817	11	117160321	T	C	1	rs202219817+rs964184	35.0878	TRUE	logTG	0.134765	FALSE	Total.Triglycerides	1.01379	FALSE	Degree.of.Unsaturation	.	.	.	1.50872	FALSE	Ratio of omega-3 fatty acids to total fatty acids	1.79967	FALSE	Omega.3.Fatty.Acids / Phosphatidylcholines	.	.	.	0.896909	Phospholipids to total lipids ratio in chylomicrons and extremely large VLDL	1.52102	Triglycerides.in.Small.VLDL / Monounsaturated.Fatty.Acids	0.879025	0.494933
19:11723655:T:C	583	2313	.	model contains colinear SNP	FALSE	FALSE	FALSE	FALSE	FALSE	FALSE	FALSE	FALSE	.	not annotated	0.999033	rs553321524	19	11723655	C	T	24	rs553321524+rs7412+rs73015024+rs58542926+rs7255743+rs62116778+rs681343+rs35081008+rs75916629+rs12720359+rs116843064+rs753931089+rs142385484+rs62116988+rs56113850+rs4808766+rs202137137+rs1640271+rs62136101+rs187551406+rs538657595+rs1029709+rs187519591+rs562494568+rs28659908	35.06	TRUE	nonHDL	0.291613	FALSE	Total.Cholesterol.Minus.HDL.C	2.3787	FALSE	Cholesteryl.Esters.in.Medium.HDL	.	.	.	2.3787	FALSE	Cholesteryl.Esters.in.Medium.HDL	2.98831	FALSE	Free.Cholesterol.in.Medium.HDL / Triglycerides.in.IDL	.	.	.	1.9114	Cholesterol to total lipids ratio in IDL	2.23391	Cholesteryl.Esters.in.IDL / Concentration.of.IDL.Particles	.	0
19:19370340:TGACA:T	584	2335	AC138430.4,HAPLN4,TM6SF2	r2 = 0.975 with rs58542926	FALSE	FALSE	FALSE	FALSE	FALSE	FALSE	FALSE	FALSE	.	not annotated	0.927153	rs150641967	19	19370340	T	TGACA	2	rs150641967+rs1065853+rs61194703	35.0264	TRUE	TC	105.614	TRUE	Total.Cholesterol	223.849	TRUE	Omega.3.Fatty.Acids	.	.	.	223.849	TRUE	Omega.3.Fatty.Acids	252.593	TRUE	Albumin / Omega.3.Fatty.Acids	.	.	.	25.7203	Cholesteryl esters to total lipids ratio in medium HDL	85.1034	Phospholipids.in.Small.VLDL / Phospholipids.in.Medium.VLDL	118.235	0
2:21413284:A:C	585	297	TDRD15-RP11-79J24.1	primary	TRUE	TRUE	TRUE	TRUE	TRUE	TRUE	FALSE	FALSE	APOB (2)	secondary association with LPmtr gene	0.19534	rs138905573	2	21413284	C	A	0	rs138905573	34.9131	TRUE	TC	205.936	TRUE	Total.Cholesterol	273.439	TRUE	Phospholipids.in.IDL	46.338	TRUE	1	273.439	TRUE	Phospholipids.in.IDL	298.526	TRUE	Phospholipids.in.Small.LDL / Average.Diameter.for.VLDL.Particles	49.2837	TRUE	1	181.405	Free cholesterol to total lipids ratio in small HDL	185.45	Free.Cholesterol.in.Small.HDL / Phospholipids.in.Small.HDL	67.5031	0
12:125369124:G:A	586	1787	SCARB1,SCARB1-RNU6-927P	primary	TRUE	TRUE	TRUE	TRUE	TRUE	TRUE	FALSE	FALSE	SCARB1 (2)	secondary association with LPmtr gene	0.877814	rs35950463	12	125369124	A	G	1	rs35950463+rs3782886	34.8928	TRUE	HDL	28.2087	TRUE	HDL.Cholesterol	45.5683	TRUE	Average.Diameter.for.HDL.Particles	6.338	TRUE	1	45.5683	TRUE	Average.Diameter.for.HDL.Particles	46.2137	TRUE	Cholesterol.in.Small.HDL / Concentration.of.HDL.Particles	6.58155	TRUE	1	18.2264	Phospholipids to total lipids ratio in small HDL	36.5165	Phospholipids.in.LDL / Total.Cholesterol	17.3597	0
4:155489608:C:T	587	712	FGB	r2 = 1 with rs6054	FALSE	FALSE	FALSE	FALSE	FALSE	FALSE	FALSE	FALSE	.	not annotated	0.994409	rs6054	4	155489608	T	C	4	rs6054+rs573930512+rs537526354+rs34707604+rs13108218	34.8601	TRUE	nonHDL	13.8266	TRUE	Total.Cholesterol.Minus.HDL.C	23.6901	TRUE	Linoleic.Acid	.	.	.	23.6901	TRUE	Linoleic.Acid	26.2955	TRUE	Linoleic.Acid / Omega.6.Fatty.Acids	.	.	.	9.21396	Phospholipids to total lipids ratio in large HDL	16.0298	Total.Lipids.in.Large.HDL / Concentration.of.Large.HDL.Particles	9.8635	0
1:219726100:G:T	588	213	RP11-95P13.1-RP11-95P13.2,RP11-95P13.2	primary	TRUE	TRUE	TRUE	TRUE	TRUE	TRUE	FALSE	FALSE	.	.	0.679906	rs1337101	1	219726100	T	G	3	rs1337101+rs10889333+rs2281721+rs114165349	34.8447	TRUE	logTG	9.593	TRUE	Total.Triglycerides	10.8588	TRUE	Triglycerides.in.Small.HDL	3.07366	FALSE	0.21	12.2882	TRUE	Triglycerides to total lipids ratio in very large HDL	14.438	TRUE	Free.Cholesterol.in.Small.HDL / Total.Concentration.of.Lipoprotein.Particles	2.9046	FALSE	0.32	7.11195	Free cholesterol to total lipids ratio in large LDL	12.3963	Free.Cholesterol.in.Small.HDL / Total.Concentration.of.Lipoprotein.Particles	1.26577	1.42945
10:94274809:A:G	589	1431	IDE	primary	TRUE	TRUE	FALSE	FALSE	FALSE	FALSE	FALSE	FALSE	.	not annotated	0.89245	rs17875327	10	94274809	G	A	5	rs17875327+rs2068888+rs7924036+rs2803619+rs41274050+rs142122182	34.7399	TRUE	logTG	5.34325	FALSE	Total.Triglycerides	6.07426	FALSE	Average.Diameter.for.VLDL.Particles	.	.	.	7.39084	FALSE	Cholesteryl esters to total lipids ratio in large HDL	8.55266	FALSE	Cholesteryl.Esters.in.Medium.VLDL / Cholesterol.in.Medium.VLDL	.	.	.	5.12634	Free cholesterol to total lipids ratio in medium LDL	7.85306	Free.Cholesterol.in.Medium.VLDL / Cholesterol.in.Medium.VLDL	0.731017	1.31658
2:135451302:G:T	590	438	TMEM163	primary	TRUE	TRUE	FALSE	FALSE	FALSE	FALSE	FALSE	FALSE	.	not annotated	0.375218	rs10928512	2	135451302	T	G	25	rs10928512+rs934197+rs4299376+rs1260326+rs150474434+rs17050272+rs10184673+rs4671050+rs12693968+rs140879085+rs79279183+rs1375131+rs1992172+rs1250259+rs191450029+rs6431630+rs141647229+rs12614487+rs10185855+rs3820897+rs12712955+rs954680+rs541138574+rs10206764+rs10184004+rs115626828	34.556	TRUE	LDL	0.594208	FALSE	Clinical.LDL.Cholesterol	3.17798	FALSE	Creatinine	.	.	.	3.17798	FALSE	Creatinine	3.99204	FALSE	Valine / Histidine	.	.	.	0.869425	Triglycerides to total lipids ratio in medium VLDL	1.70954	Triglycerides.in.Small.HDL / Triglycerides.in.Very.Large.HDL	2.58377	0
8:18272881:G:A	591	1184	NAT2-PSD3	r2 = 0.991 with rs35246381	FALSE	FALSE	FALSE	FALSE	FALSE	FALSE	FALSE	FALSE	.	not annotated	0.221094	rs1495741	8	18272881	A	G	6	rs1495741+rs28601761+rs9987289+rs9297994+rs2737245+rs11787335+rs9298506	34.5361	TRUE	LDL	4.74856	FALSE	Clinical.LDL.Cholesterol	44.4573	TRUE	Triglycerides.in.Medium.HDL	.	.	.	44.4573	TRUE	Triglycerides.in.Medium.HDL	70.5039	TRUE	Triglycerides.in.Medium.HDL / Tyrosine	.	.	.	22.965	Phospholipids to total lipids ratio in small LDL	38.3504	Cholesterol.in.Large.HDL / Concentration.of.Large.HDL.Particles	39.7087	0
1:150940625:T:G	592	172	RP11-316M1.3,SETDB1,RP11-316M1.12,CERS2	primary	TRUE	TRUE	TRUE	TRUE	TRUE	TRUE	TRUE	TRUE	CERS2	may be involved in sphingolipid synthesis	0.77816	rs267738	1	150940625	G	T	8	rs267738+rs10127775+rs3768321+rs646776+rs75460349+rs2642438+rs4847419+rs1689797+rs333947	34.433	TRUE	HDL	15.4794	TRUE	HDL.Cholesterol	44.5905	TRUE	Phospholipids.in.Small.HDL	5.26548	TRUE	1	44.5905	TRUE	Phospholipids.in.Small.HDL	71.5381	TRUE	Phospholipids.in.Small.HDL / Creatinine	10.5113	TRUE	1	20.5564	Phospholipids to total lipids ratio in large HDL	50.4632	Phospholipids.in.Large.HDL / Total.Lipids.in.Very.Large.HDL	29.1111	0
5:156391628:T:C	593	803	.	duplicate model	FALSE	FALSE	FALSE	FALSE	FALSE	FALSE	FALSE	FALSE	.	not annotated	.	rs6874202	5	156391628	C	T	.	.	34.382	TRUE	nonHDL	.	.	.	.	.	.	.	.	.	.	.	.	.	.	.	.	.	.	.	.	.	.	.	.
19:35551428:C:A	594	2361	HPN,HPN-AS1	primary	TRUE	TRUE	TRUE	TRUE	TRUE	TRUE	FALSE	FALSE	.	.	0.823733	rs58895965	19	35551428	A	C	5	rs58895965+rs483082+rs116843064+rs58542926+rs4804414+rs838133	34.1838	TRUE	logTG	9.15476	TRUE	Total.Triglycerides	48.9474	TRUE	Albumin	6.84022	TRUE	1	48.9474	TRUE	Albumin	53.6657	TRUE	Albumin / Average.Diameter.for.HDL.Particles	6.90872	TRUE	1	5.49545	Triglycerides to total lipids ratio in very large HDL	13.8714	Total.Lipids.in.IDL / Total.Free.Cholesterol	39.7927	0
3:12393125:C:G	595	501	PPARG	primary	TRUE	TRUE	TRUE	TRUE	TRUE	TRUE	TRUE	FALSE	PPARG (2)	secondary association with LPmtr gene	0.879419	rs1801282	3	12393125	G	C	2	rs1801282+rs684773+rs79287178	34.1451	TRUE	logTG	9.30481	TRUE	Total.Triglycerides	12.9928	TRUE	Average.Diameter.for.VLDL.Particles	2.68613	FALSE	0.16	13.3884	TRUE	Cholesteryl esters to total lipids ratio in large VLDL	19.3318	TRUE	Triglycerides.in.Medium.LDL / Triglycerides.in.IDL	4.50767	TRUE	0.54	7.65982	Cholesteryl esters to total lipids ratio in medium VLDL	13.751	Cholesteryl.Esters.in.VLDL / VLDL.Cholesterol	3.68801	0.395567
10:94839642:G:A	596	1432	CYP26A1,CYP26A1-NIP7P1	r2 = 0.997 with rs4418728	FALSE	FALSE	FALSE	FALSE	FALSE	FALSE	FALSE	FALSE	.	not annotated	0.5525	rs2068888	10	94839642	A	G	2	rs2068888+rs2792751+rs7904973	34.1284	TRUE	LDL	9.38723	TRUE	Clinical.LDL.Cholesterol	30.0781	TRUE	Concentration.of.Small.VLDL.Particles	.	.	.	30.0781	TRUE	Concentration.of.Small.VLDL.Particles	47.531	TRUE	Total.Lipids.in.Small.VLDL / Citrate	.	.	.	14.7336	Cholesterol to total lipids ratio in medium HDL	28.4489	Phosphoglycerides / Free.Cholesterol.in.HDL	20.6908	0
1:62954372:G:GA	597	98	DOCK7	r2 = 0.974 with rs598253	FALSE	FALSE	FALSE	FALSE	FALSE	FALSE	FALSE	FALSE	.	not annotated	0.646341	rs397713378	1	62954372	GA	G	0	rs397713378	34.0784	TRUE	logTG	167.646	TRUE	Total.Triglycerides	267.337	TRUE	Polyunsaturated.Fatty.Acids	.	.	.	267.337	TRUE	Polyunsaturated.Fatty.Acids	312.712	TRUE	Albumin / Polyunsaturated.Fatty.Acids	.	.	.	154.46	Cholesteryl esters to total lipids ratio in small LDL	230.816	Free.Cholesterol.in.Small.LDL / LDL.Cholesterol	99.6903	0
10:45958856:G:C	598	1399	MARCH8	r2 = 0.985 with rs55665473	FALSE	FALSE	FALSE	FALSE	FALSE	FALSE	FALSE	FALSE	.	not annotated	0.758573	rs2291428	10	45958856	C	G	5	rs2291428+rs2792751+rs7903402+rs7904973+rs2068888+rs17476364	34.0696	TRUE	TC	7.61557	FALSE	Total.Cholesterol	22.3299	TRUE	Concentration.of.Large.HDL.Particles	.	.	.	22.3299	TRUE	Concentration.of.Large.HDL.Particles	31.5903	TRUE	Albumin / Apolipoprotein.A1	.	.	.	5.5702	Free cholesterol to total lipids ratio in very large HDL	14.3306	Triglycerides.in.Very.Large.HDL / Triglycerides.in.Very.Small.VLDL	14.7143	0
14:70846954:T:C	599	1857	SYNJ2BP-COX16,SYNJ2BP	r2 = 0.992 with rs7149261	FALSE	FALSE	FALSE	FALSE	FALSE	FALSE	FALSE	FALSE	.	not annotated	0.138193	rs7157399	14	70846954	C	T	2	rs7157399+rs11621792+rs17580	34.0164	TRUE	LDL	8.46195	TRUE	Clinical.LDL.Cholesterol	11.2012	TRUE	Phospholipids.in.Small.LDL	.	.	.	11.2012	TRUE	Phospholipids.in.Small.LDL	16.2809	TRUE	Phospholipids.in.IDL / Omega.6.Fatty.Acids	.	.	.	8.01352	Free cholesterol to total lipids ratio in large HDL	9.208	Total.Lipids.in.HDL / Free.Cholesterol.in.HDL	2.7393	0
4:71474948:G:C	600	639	AMBN-ENAM,AMBN	MAF<1%	FALSE	FALSE	FALSE	FALSE	FALSE	FALSE	FALSE	FALSE	.	not annotated	0.999957	rs530082542	4	71474948	C	G	11	rs530082542+rs573930512+rs537526354+rs4860987+rs13108218+rs938075289+rs13107325+rs189087436+rs6054+rs41280463+rs28497720+rs3775228	33.7471	TRUE	TC	0.188253	FALSE	Total.Cholesterol	0.807488	FALSE	Cholesterol.in.Very.Small.VLDL	.	.	.	1.11289	FALSE	Free cholesterol to total lipids ratio in large VLDL	1.9974	FALSE	Cholesterol.in.Small.LDL / Total.Cholesterol.Minus.HDL.C	.	.	.	0.95598	Triglycerides to total lipids ratio in large VLDL	1.82323	Cholesterol.in.Small.LDL / Total.Cholesterol.Minus.HDL.C	0.619234	0.305401
6:100602753:G:A	601	941	PRDX2P4-RP3-344J20.1	r2 = 0.989 with rs17789218	FALSE	FALSE	FALSE	FALSE	FALSE	FALSE	FALSE	FALSE	.	not annotated	0.758153	rs9496567	6	100602753	A	G	7	rs9496567+rs10455872+rs2235215+rs1800562+rs6689+rs2297359+rs9399137+rs148349043	33.7399	TRUE	LDL	8.58075	TRUE	Clinical.LDL.Cholesterol	13.3134	TRUE	Concentration.of.Very.Small.VLDL.Particles	.	.	.	13.3134	TRUE	Concentration.of.Very.Small.VLDL.Particles	18.056	TRUE	Total.Lipids.in.Small.VLDL / Valine	.	.	.	4.25194	Cholesteryl esters to total lipids ratio in medium HDL	6.85598	Cholesterol.in.Very.Large.HDL / Concentration.of.Very.Large.HDL.Particles	4.73265	0
2:43467835:G:A	602	363	THADA	r2 = 0.735 with rs72616903	FALSE	FALSE	FALSE	FALSE	FALSE	FALSE	FALSE	FALSE	.	not annotated	0.840719	rs72613899	2	43467835	A	G	18	rs72613899+rs934197+rs4299376+rs1260326+rs907866+rs113867238+rs10184673+rs55938402+rs17050272+rs887829+rs1375131+rs4671050+rs556971810+rs1250259+rs10164853+rs1992172+rs2194562+rs954680+rs6734238	33.719	TRUE	TC	2.26674	FALSE	Total.Cholesterol	6.97147	FALSE	Triglycerides.in.LDL	.	.	.	6.97147	FALSE	Triglycerides.in.LDL	8.89066	FALSE	Triglycerides.in.Medium.LDL / Glutamine	.	.	.	2.67904	Cholesteryl esters to total lipids ratio in medium HDL	4.09781	Cholesterol.in.Very.Large.HDL / Concentration.of.Very.Large.HDL.Particles	4.70473	0
6:161659369:C:G	603	1024	AGPAT4	r2 = 1 with rs148349043	FALSE	FALSE	FALSE	FALSE	FALSE	FALSE	FALSE	FALSE	.	not annotated	0.991254	rs148349043	6	161659369	G	C	12	rs148349043+rs10455872+rs6689+rs2235215+rs80215559+rs9402685+rs78425119+rs3800461+rs6457374+rs1338667+rs622871+rs9496567+rs2844795	33.684	TRUE	TC	0.808208	FALSE	Total.Cholesterol	25.6627	TRUE	Triglycerides.in.Chylomicrons.and.Extremely.Large.VLDL	.	.	.	25.6627	TRUE	Triglycerides.in.Chylomicrons.and.Extremely.Large.VLDL	38.1942	TRUE	Triglycerides.in.Small.LDL / Triglycerides.in.Very.Small.VLDL	.	.	.	9.85018	Phospholipids to total lipids ratio in small LDL	28.613	Triglycerides.in.Large.LDL / Triglycerides.in.LDL	24.8545	0
2:203302627:G:A	604	468	BMPR2	primary	TRUE	TRUE	TRUE	TRUE	TRUE	FALSE	FALSE	FALSE	.	.	0.744502	rs12693968	2	203302627	A	G	7	rs12693968+rs934197+rs4299376+rs1260326+rs150474434+rs17050272+rs10184673+rs4671050	33.644	TRUE	LDL	12.4997	TRUE	Clinical.LDL.Cholesterol	16.1798	TRUE	Phospholipids.in.Small.LDL	2.80328	FALSE	0.1	16.1798	TRUE	Phospholipids.in.Small.LDL	17.8359	TRUE	Total.Lipids.in.Small.LDL / Tyrosine	3.97537	FALSE	0.17	4.04308	Phospholipids to total lipids ratio in small HDL	6.04029	Tyrosine / Monounsaturated.Fatty.Acids	3.6801	0
5:67714246:A:G	605	740	CTD-2582M21.1-CTC-537E7.3	r2 = 1 with rs4976033	FALSE	FALSE	FALSE	FALSE	FALSE	FALSE	FALSE	FALSE	.	not annotated	0.600348	rs4976033	5	67714246	G	A	5	rs4976033+rs6882076+rs28650790+rs2914231+rs6595187+rs72801474	33.5735	TRUE	logTG	11.0917	TRUE	Total.Triglycerides	11.5351	TRUE	Triglycerides.in.Very.Large.VLDL	.	.	.	11.5351	TRUE	Triglycerides.in.Very.Large.VLDL	14.8684	TRUE	Monounsaturated.Fatty.Acids / Total.Triglycerides	.	.	.	6.82357	Cholesteryl esters to total lipids ratio in medium HDL	9.61256	Free.Cholesterol.in.Small.HDL / Total.Concentration.of.Lipoprotein.Particles	0.44341	0
2:62988169:G:T	606	392	EHBP1	primary	TRUE	TRUE	TRUE	TRUE	TRUE	TRUE	FALSE	FALSE	.	.	0.687437	rs4671050	2	62988169	T	G	10	rs4671050+rs934197+rs4299376+rs1260326+rs907866+rs113867238+rs10184673+rs55938402+rs17050272+rs887829+rs1375131	33.5171	TRUE	TC	11.4215	TRUE	Total.Cholesterol	21.1254	TRUE	Cholesteryl.Esters.in.Medium.VLDL	2.69092	FALSE	0.2	21.1254	TRUE	Cholesteryl.Esters.in.Medium.VLDL	23.4282	TRUE	Cholesteryl.Esters.in.Small.HDL / Cholesteryl.Esters.in.Medium.VLDL	2.85495	FALSE	0.24	9.88973	Phospholipids to total lipids ratio in very large VLDL	16.4259	Concentration.of.HDL.Particles / Total.Concentration.of.Lipoprotein.Particles	9.70391	0
6:27274834:C:T	607	850	POM121L2	primary	TRUE	TRUE	FALSE	FALSE	FALSE	FALSE	FALSE	FALSE	.	not annotated	0.888221	rs56114371	6	27274834	T	C	31	rs56114371+rs998584+rs9461755+rs9468937+rs672457+rs622871+rs41272086+rs577721086+rs144607208+rs2749005+rs78425119+rs3094034+rs7740188+rs35045014+rs75507056+rs73029263+rs9480889+rs9258375+rs3131337+rs742493+rs398085093+rs7451008+rs9496567+rs9321765+rs1464780+rs6924805+rs6934083+rs6913325+rs607335+rs7757363+rs3176320+rs9379828	33.4776	TRUE	logTG	0.0934818	FALSE	Total.Triglycerides	2.48546	FALSE	Pyruvate	.	.	.	2.48546	FALSE	Pyruvate	4.46179	FALSE	Pyruvate / Phenylalanine	.	.	.	0.496248	Ratio of saturated fatty acids to total fatty acids	2.11125	Tyrosine / Phenylalanine	2.39198	0
3:12351223:A:G	608	499	PPARG	r2 = 0.991 with rs12633551	FALSE	FALSE	FALSE	FALSE	FALSE	FALSE	FALSE	FALSE	.	not annotated	0.974422	rs12485478	3	12351223	G	A	4	rs12485478+rs7634917+rs1154988+rs10049088+rs1516725	33.4045	TRUE	HDL	8.47925	TRUE	HDL.Cholesterol	15.0154	TRUE	Cholesteryl.Esters.in.Very.Large.HDL	.	.	.	15.878	TRUE	Phospholipids to total lipids ratio in large HDL	20.2102	TRUE	Phospholipids.in.Large.HDL / Concentration.of.Large.HDL.Particles	.	.	.	9.98961	Free cholesterol to total lipids ratio in medium VLDL	13.7873	Total.Lipids.in.Small.HDL / Total.Concentration.of.Lipoprotein.Particles	6.5362	0.862534
19:11346550:C:T	609	2305	DOCK6,C19orf80,RN7SL298P	primary	TRUE	TRUE	TRUE	TRUE	TRUE	TRUE	FALSE	FALSE	ANGPTL8 (2)	secondary association with LPmtr gene	0.924442	rs3760782	19	11346550	T	C	0	rs3760782	33.3751	TRUE	HDL	28.5123	TRUE	HDL.Cholesterol	35.1121	TRUE	Phospholipids.in.Medium.HDL	22.1116	TRUE	0.95	35.1121	TRUE	Phospholipids.in.Medium.HDL	40.5803	TRUE	Concentration.of.Medium.HDL.Particles / Albumin	24.507	TRUE	0.98	13.7033	Phospholipids to total lipids ratio in very small VLDL	30.4027	Concentration.of.LDL.Particles / Total.Cholesterol.Minus.HDL.C	6.59983	0
7:1047615:A:G	610	1027	.	duplicate model	FALSE	FALSE	FALSE	FALSE	FALSE	FALSE	FALSE	FALSE	.	not annotated	.	rs10272002	7	1047615	G	A	.	.	33.3233	TRUE	LDL	.	.	.	.	.	.	.	.	.	.	.	.	.	.	.	.	.	.	.	.	.	.	.	.
12:25409070:T:C	611	1665	KRAS-RNU4-67P	r2 = 1 with rs75667995	FALSE	FALSE	FALSE	FALSE	FALSE	FALSE	FALSE	FALSE	.	not annotated	0.928429	rs75667995	12	25409070	C	T	8	rs75667995+rs1169288+rs3184504+rs4883201+rs28866344+rs76895963+rs888192+rs921919+rs111299924	33.219	TRUE	TC	7.94728	FALSE	Total.Cholesterol	11.8076	TRUE	Cholesteryl.Esters.in.Small.HDL	.	.	.	11.8076	TRUE	Cholesteryl.Esters.in.Small.HDL	14.8528	TRUE	Phospholipids.in.Medium.LDL / Creatinine	.	.	.	5.0807	Cholesteryl esters to total lipids ratio in very large HDL	6.19823	Cholesteryl.Esters.in.Very.Large.HDL / Phospholipids.in.Very.Large.HDL	3.86033	0
20:32952125:G:A	612	2485	ITCH	primary	TRUE	TRUE	TRUE	TRUE	TRUE	FALSE	FALSE	FALSE	.	.	0.571022	rs12624640	20	32952125	A	G	3	rs12624640+rs1800961+rs6065908+rs4239651	33.2076	TRUE	HDL	8.28639	TRUE	HDL.Cholesterol	15.0776	TRUE	Creatinine	4.30644	TRUE	0.4	15.0776	TRUE	Creatinine	19.435	TRUE	Creatinine / Total.Concentration.of.Lipoprotein.Particles	4.2102	TRUE	0.65	7.23029	Cholesteryl esters to total lipids ratio in very small VLDL	10.6228	Total.Fatty.Acids / Triglycerides.in.LDL	6.79119	0
16:72148419:A:G	613	2038	DHX38,PMFBP1	r2 = 0.957 with rs34042070	FALSE	FALSE	FALSE	FALSE	FALSE	FALSE	FALSE	FALSE	.	not annotated	0.812673	rs12445401	16	72148419	G	A	3	rs12445401+rs17231506+rs2925979+rs12928099	33.0386	TRUE	logTG	18.3916	TRUE	Total.Triglycerides	249.944	TRUE	Glycoprotein.Acetyls	.	.	.	249.944	TRUE	Glycoprotein.Acetyls	456.514	TRUE	Glycoprotein.Acetyls / Total.Lipids.in.Lipoprotein.Particles	.	.	.	18.867	Phospholipids to total lipids ratio in very large VLDL	206.57	Glycoprotein.Acetyls / Total.Lipids.in.Lipoprotein.Particles	231.552	0
11:5701074:C:A	614	1494	TRIM5	r2 = 1 with rs11601507	FALSE	FALSE	FALSE	FALSE	FALSE	FALSE	FALSE	FALSE	.	not annotated	0.932027	rs11601507	11	5701074	A	C	4	rs11601507+rs174547+rs964184+rs112771035+rs10832956	33.0241	TRUE	LDL	7.7264	FALSE	Clinical.LDL.Cholesterol	25.2229	TRUE	Cholesterol.in.Very.Small.VLDL	.	.	.	25.2229	TRUE	Cholesterol.in.Very.Small.VLDL	45.9084	TRUE	Phospholipids.in.Small.HDL / Cholesterol.in.Very.Small.VLDL	.	.	.	22.3371	Phospholipids to total lipids ratio in very large VLDL	26.0048	Cholesterol.in.Small.HDL / Total.Lipids.in.IDL	17.4965	0
12:125316031:G:T	615	1782	SCARB1	r2 = 0.949 with rs10846742	FALSE	FALSE	FALSE	FALSE	FALSE	FALSE	FALSE	FALSE	.	not annotated	0.863192	rs11057839	12	125316031	T	G	1	rs11057839+rs1169288	32.9101	TRUE	nonHDL	12.0437	TRUE	Total.Cholesterol.Minus.HDL.C	14.9233	TRUE	Cholesteryl.Esters.in.Medium.LDL	.	.	.	14.9233	TRUE	Cholesteryl.Esters.in.Medium.LDL	16.0312	TRUE	Cholesteryl.Esters.in.Medium.LDL / Albumin	.	.	.	4.33518	Phospholipids to total lipids ratio in very large HDL	10.8034	Apolipoprotein.A1 / Total.Concentration.of.Lipoprotein.Particles	2.87958	0
1:178523126:A:C	616	193	C1orf220-RNA5SP69	primary	TRUE	TRUE	TRUE	TRUE	TRUE	TRUE	TRUE	FALSE	.	.	0.464682	rs10913570	1	178523126	C	A	9	rs10913570+rs10127775+rs3768321+rs646776+rs75460349+rs2642438+rs4847419+rs1689797+rs333947+rs267738	32.8894	TRUE	HDL	15.5567	TRUE	HDL.Cholesterol	22.6586	TRUE	Phospholipids.in.Large.HDL	2.64651	FALSE	0.76	22.6586	TRUE	Phospholipids.in.Large.HDL	29.4505	TRUE	Albumin / Phospholipids.in.HDL	4.7656	TRUE	0.93	14.9977	Phospholipids to total lipids ratio in small HDL	23.5324	Cholesterol.in.IDL / Phospholipids.in.LDL	7.10185	0
3:58421338:C:G	617	531	PDHB-RP11-359I18.5,PDHB	r2 = 0.999 with rs9844432	FALSE	FALSE	FALSE	FALSE	FALSE	FALSE	FALSE	FALSE	.	not annotated	0.917548	rs4519721	3	58421338	G	C	1	rs4519721+rs1151996	32.8539	TRUE	nonHDL	12.2803	TRUE	Total.Cholesterol.Minus.HDL.C	16.3492	TRUE	Cholesteryl.Esters.in.Medium.VLDL	.	.	.	16.3492	TRUE	Cholesteryl.Esters.in.Medium.VLDL	17.9212	TRUE	Free.Cholesterol.in.Small.HDL / Total.Cholesterol	.	.	.	8.17382	Phospholipids to total lipids ratio in very large VLDL	11.6589	Triglycerides.in.Small.HDL / Phospholipids.in.VLDL	4.06884	0
11:14865399:C:T	618	1500	PDE3B	MAF<1%	FALSE	FALSE	FALSE	FALSE	FALSE	FALSE	FALSE	FALSE	.	not annotated	0.999185	rs150090666	11	14865399	T	C	6	rs150090666+rs964184+rs192489212+rs174562+rs56271783+rs3758669+rs1037169	32.8386	TRUE	logTG	17.8539	TRUE	Total.Triglycerides	18.6815	TRUE	Triglycerides.in.Small.HDL	.	.	.	20.745	TRUE	Triglycerides to total lipids ratio in small HDL	21.6727	TRUE	Triglycerides.in.Small.HDL / Phospholipids.in.Medium.HDL	.	.	.	12.8008	Free cholesterol to total lipids ratio in large LDL	19.8972	Free.Cholesterol.in.Small.HDL / Total.Concentration.of.Lipoprotein.Particles	0.82756	2.06353
2:20371380:G:A	619	263	RN7SL140P,AC098828.3-RN7SL140P,RNU6-961P	r2 = 1 with rs907866	FALSE	FALSE	FALSE	FALSE	FALSE	FALSE	FALSE	FALSE	.	not annotated	0.554936	rs907866	2	20371380	A	G	6	rs907866+rs934197+rs4299376+rs1260326+rs150474434+rs17050272+rs66491446	32.8097	TRUE	nonHDL	17.5097	TRUE	Total.Cholesterol.Minus.HDL.C	49.0772	TRUE	Phosphatidylcholines	.	.	.	49.0772	TRUE	Phosphatidylcholines	55.9081	TRUE	Apolipoprotein.B / Remnant.Cholesterol..Non.HDL..Non.LDL..Cholesterol.	.	.	.	14.8076	Cholesteryl esters to total lipids ratio in small LDL	37.4293	Phospholipids.in.LDL / Total.Cholesterol.Minus.HDL.C	31.5675	0
3:32514647:T:A	620	511	CMTM7	r2 = 1 with rs9837622	FALSE	FALSE	FALSE	FALSE	FALSE	FALSE	FALSE	FALSE	.	not annotated	0.925995	rs9837622	3	32514647	A	T	2	rs9837622+rs1151996+rs4519721	32.7305	TRUE	nonHDL	10.8319	TRUE	Total.Cholesterol.Minus.HDL.C	14.4374	TRUE	Cholesteryl.Esters.in.Medium.VLDL	.	.	.	14.4374	TRUE	Cholesteryl.Esters.in.Medium.VLDL	16.2978	TRUE	Cholesteryl.Esters.in.Medium.VLDL / Albumin	.	.	.	5.08568	Phospholipids to total lipids ratio in small HDL	11.6254	Concentration.of.HDL.Particles / Total.Concentration.of.Lipoprotein.Particles	3.60544	0
16:11706100:G:A	621	1962	LITAF	r2 = 1 with rs12445804	FALSE	FALSE	FALSE	FALSE	FALSE	FALSE	FALSE	FALSE	.	not annotated	0.927614	rs12445804	16	11706100	A	G	2	rs12445804+rs34042070+rs247616	32.699	TRUE	TC	9.37153	TRUE	Total.Cholesterol	11.1774	TRUE	Cholesterol.in.Medium.VLDL	.	.	.	11.1774	TRUE	Cholesterol.in.Medium.VLDL	12.6907	TRUE	Albumin / Total.Free.Cholesterol	.	.	.	4.25158	Phospholipids to total lipids ratio in large HDL	4.8353	Concentration.of.HDL.Particles / Total.Concentration.of.Lipoprotein.Particles	1.80589	0
16:83979317:T:C	622	2057	RP11-505K9.4,OSGIN1	primary	TRUE	TRUE	FALSE	TRUE	TRUE	FALSE	FALSE	FALSE	.	.	0.627011	rs67890964	16	83979317	C	T	2	rs67890964+rs34042070+rs247617	32.6345	TRUE	LDL	5.72708	FALSE	Clinical.LDL.Cholesterol	12.0976	TRUE	Cholesterol.in.Very.Small.VLDL	1.16433	FALSE	0.04	12.0976	TRUE	Cholesterol.in.Very.Small.VLDL	16.9249	TRUE	Free.Cholesterol.in.Very.Small.VLDL / Creatinine	1.67467	FALSE	0.27	6.66606	Free cholesterol to total lipids ratio in large HDL	6.69971	Triglycerides.in.Small.HDL / Total.Lipids.in.VLDL	6.37054	0
4:3443931:A:G	623	603	RGS12,HGFAC	r2 = 1 with rs13108218	FALSE	FALSE	FALSE	FALSE	FALSE	FALSE	FALSE	FALSE	.	not annotated	0.37969	rs13108218	4	3443931	G	A	5	rs13108218+rs187918276+rs537526354+rs181372486+rs4860987+rs938075289	32.5834	TRUE	LDL	22.7079	TRUE	Clinical.LDL.Cholesterol	39.8603	TRUE	Omega.6.Fatty.Acids	.	.	.	39.8603	TRUE	Omega.6.Fatty.Acids	51.8991	TRUE	Free.Cholesterol.in.Very.Small.VLDL / Phospholipids.in.Small.VLDL	.	.	.	13.4698	Triglycerides to total lipids ratio in very large HDL	27.6304	Total.Lipids.in.Very.Large.HDL / Concentration.of.Very.Large.HDL.Particles	17.1524	0
2:20370641:A:C	624	261	RN7SL140P,AC098828.3-RN7SL140P,RNU6-961P	r2 = 0.883 with rs907866	FALSE	FALSE	FALSE	FALSE	FALSE	FALSE	FALSE	FALSE	.	not annotated	0.523454	rs79279183	2	20370641	C	A	9	rs79279183+rs934197+rs4299376+rs1260326+rs150474434+rs17050272+rs10184673+rs4671050+rs12693968+rs140879085	32.52	TRUE	LDL	9.10545	TRUE	Clinical.LDL.Cholesterol	47.6963	TRUE	Phosphatidylcholines	.	.	.	47.6963	TRUE	Phosphatidylcholines	55.0189	TRUE	Apolipoprotein.B / Remnant.Cholesterol..Non.HDL..Non.LDL..Cholesterol.	.	.	.	15.664	Cholesteryl esters to total lipids ratio in small LDL	36.4315	Phospholipids.in.LDL / Total.Cholesterol.Minus.HDL.C	38.5909	0
3:156795414:G:T	625	581	LEKR1-LINC00880,LINC00880,RP11-6F2.5	r2 = 0.995 with rs10049088	FALSE	FALSE	FALSE	FALSE	FALSE	FALSE	FALSE	FALSE	.	not annotated	0.613096	rs9817452	3	156795414	T	G	3	rs9817452+rs684773+rs79287178+rs1801282	32.4365	TRUE	logTG	7.15493	FALSE	Total.Triglycerides	13.3754	TRUE	Cholesteryl.Esters.in.Medium.HDL	.	.	.	13.8878	TRUE	Triglycerides to total lipids ratio in small HDL	21.3068	TRUE	Concentration.of.LDL.Particles / Phospholipids.in.LDL	.	.	.	9.42404	Cholesteryl esters to total lipids ratio in IDL	20.2802	Concentration.of.LDL.Particles / Phospholipids.in.LDL	6.22049	0.512403
22:38599978:G:A	626	2595	MAFF,PLA2G6	primary	TRUE	TRUE	TRUE	TRUE	TRUE	TRUE	TRUE	TRUE	PLA2G6	A2 phospholipase, catalyzes the release of fatty acids from phospholipids	0.418105	rs4820325	22	38599978	A	G	0	rs4820325	32.4314	TRUE	logTG	14.3393	TRUE	Total.Triglycerides	18.9718	TRUE	Creatinine	0.951043	FALSE	0.64	19.1161	TRUE	Triglycerides to total lipids ratio in small HDL	23.1009	TRUE	Creatinine / Cholesteryl.Esters.in.HDL	1.60781	FALSE	0.75	15.1044	Cholesterol to total lipids ratio in IDL	17.1977	Cholesteryl.Esters.in.Very.Small.VLDL / Cholesterol.in.Very.Small.VLDL	4.63253	0.144255
17:76387363:G:T	627	2197	PGS1	r2 = 1 with rs11657987	FALSE	FALSE	FALSE	FALSE	FALSE	FALSE	FALSE	FALSE	.	not annotated	0.504492	rs11657987	17	76387363	T	G	5	rs11657987+rs77542162+rs186021206+rs1801689+rs12603290+rs704	32.426	TRUE	LDL	13.9266	TRUE	Clinical.LDL.Cholesterol	27.0176	TRUE	Total.Concentration.of.Lipoprotein.Particles	.	.	.	27.0176	TRUE	Total.Concentration.of.Lipoprotein.Particles	34.7275	TRUE	Albumin / Total.Concentration.of.Lipoprotein.Particles	.	.	.	20.2539	Phospholipids to total lipids ratio in small VLDL	23.2299	Phospholipids.in.Small.VLDL / Concentration.of.Small.VLDL.Particles	13.091	0
20:569164:C:T	628	2466	CSNK2A1-TCF15	primary	TRUE	TRUE	FALSE	FALSE	FALSE	FALSE	FALSE	FALSE	.	not annotated	0.984716	rs151235402	20	569164	T	C	4	rs151235402+rs1800961+rs6065908+rs4239651+rs12624640	32.3893	TRUE	HDL	3.37599	FALSE	HDL.Cholesterol	5.7524	FALSE	Average.Diameter.for.VLDL.Particles	.	.	.	7.60542	FALSE	Cholesteryl esters to total lipids ratio in very large VLDL	7.95423	FALSE	Concentration.of.Large.VLDL.Particles / Triglycerides.in.Very.Large.VLDL	.	.	.	5.86226	Cholesterol to total lipids ratio in medium VLDL	7.20765	Cholesteryl.Esters.in.VLDL / VLDL.Cholesterol	2.37642	1.85302
6:160986280:G:A	629	1007	LPA	MAF<1%	FALSE	FALSE	FALSE	FALSE	FALSE	FALSE	FALSE	FALSE	.	not annotated	0.999978	rs190068306	6	160986280	A	G	0	rs190068306	32.388	TRUE	LDL	0.149557	FALSE	Clinical.LDL.Cholesterol	1.15349	FALSE	Glucose	.	.	.	1.6952	FALSE	Phospholipids to total lipids ratio in medium LDL	2.16764	FALSE	Phospholipids.in.Medium.LDL / Concentration.of.Medium.LDL.Particles	.	.	.	1.45168	Phospholipids to total lipids ratio in medium LDL	1.92412	Phospholipids.in.Medium.LDL / Concentration.of.Medium.LDL.Particles	1.00394	0.541711
1:39819503:G:A	630	36	MACF1	r2 = 0.748 with rs3768321	FALSE	FALSE	FALSE	FALSE	FALSE	FALSE	FALSE	FALSE	.	not annotated	0.788351	rs4660690	1	39819503	A	G	4	rs4660690+rs10889333+rs2281721+rs114165349+rs1337101	32.2248	TRUE	logTG	12.5889	TRUE	Total.Triglycerides	25.9584	TRUE	Cholesteryl.Esters.in.HDL	.	.	.	26.9747	TRUE	Phospholipids to total lipids ratio in medium HDL	34.4031	TRUE	Triglycerides.in.IDL / Phosphoglycerides	.	.	.	17.8911	Cholesterol to total lipids ratio in IDL	24.6907	Phospholipids.in.Large.LDL / Apolipoprotein.B	13.3695	1.01627
5:132444128:G:A	631	780	HSPA4,RP11-485M7.3,HSPA4-RP11-485M7.3	primary	TRUE	TRUE	TRUE	TRUE	TRUE	TRUE	FALSE	FALSE	.	.	0.906568	rs72801474	5	132444128	A	G	4	rs72801474+rs6882076+rs28650790+rs2914231+rs6595187	31.9318	TRUE	logTG	8.35334	TRUE	Total.Triglycerides	12.0721	TRUE	Glycoprotein.Acetyls	1.86249	FALSE	0.29	13.1258	TRUE	Phospholipids to total lipids ratio in medium HDL	22.2929	TRUE	Glycoprotein.Acetyls / Creatinine	0.922594	FALSE	0.73	10.58	Free cholesterol to total lipids ratio in large LDL	11.4058	Cholesteryl.Esters.in.LDL / LDL.Cholesterol	3.71874	1.05371
3:119536429:G:A	632	542	GSK3B,NR1I2	r2 = 1 with rs3732359	FALSE	FALSE	FALSE	FALSE	FALSE	FALSE	FALSE	FALSE	.	not annotated	0.215934	rs3732359	3	119536429	A	G	4	rs3732359+rs13076933+rs9844432+rs77682405+rs9837622	31.8861	TRUE	TC	5.60068	FALSE	Total.Cholesterol	8.25144	FALSE	Total.Phospholipids.in.Lipoprotein.Particles	.	.	.	8.25144	FALSE	Total.Phospholipids.in.Lipoprotein.Particles	12.3825	TRUE	Citrate / Phosphoglycerides	.	.	.	2.79019	Cholesteryl esters to total lipids ratio in small LDL	6.18296	Free.Cholesterol.in.Small.LDL / Clinical.LDL.Cholesterol	2.65076	0
3:50049299:T:G	633	521	RBM6	primary	TRUE	TRUE	TRUE	TRUE	TRUE	TRUE	TRUE	FALSE	.	.	0.534179	rs7634917	3	50049299	G	T	0	rs7634917	31.881	TRUE	HDL	10.0212	TRUE	HDL.Cholesterol	12.984	TRUE	Concentration.of.Large.HDL.Particles	1.56899	FALSE	0.37	15.2341	TRUE	Free cholesterol to total lipids ratio in very large HDL	26.9083	TRUE	Glycoprotein.Acetyls / Polyunsaturated.Fatty.Acids	3.17243	FALSE	0.87	8.33701	Free cholesterol to total lipids ratio in small HDL	16.5602	Glycoprotein.Acetyls / Polyunsaturated.Fatty.Acids	2.96279	2.25008
2:3640142:C:T	634	247	COLEC11,RPS7-COLEC11	primary	TRUE	TRUE	TRUE	TRUE	TRUE	TRUE	TRUE	FALSE	.	.	0.177215	rs6542680	2	3640142	T	C	4	rs6542680+rs676210+rs2943645+rs78058190+rs13389219	31.8794	TRUE	HDL	8.2794	TRUE	HDL.Cholesterol	10.634	TRUE	Cholesterol.in.IDL	1.20303	FALSE	0.02	16.5394	TRUE	Cholesteryl esters to total lipids ratio in very small VLDL	19.4873	TRUE	Cholesterol.in.Small.LDL / Clinical.LDL.Cholesterol	2.54058	FALSE	0.22	12.9324	Free cholesterol to total lipids ratio in small VLDL	14.2723	Free.Cholesterol.in.Small.VLDL / Phospholipids.in.Small.VLDL	2.3546	5.90544
5:118723609:A:G	635	768	TNFAIP8	primary	TRUE	TRUE	TRUE	TRUE	TRUE	FALSE	FALSE	FALSE	.	.	0.716037	rs6595187	5	118723609	G	A	3	rs6595187+rs6882076+rs28650790+rs2914231	31.8697	TRUE	logTG	9.19854	TRUE	Total.Triglycerides	9.79427	TRUE	Triglycerides.in.Small.VLDL	1.31044	FALSE	0.11	10.9251	TRUE	Triglycerides to total lipids ratio in small HDL	13.7248	TRUE	Triglycerides.in.Small.LDL / Monounsaturated.Fatty.Acids	2.15823	FALSE	0.25	7.19286	Free cholesterol to total lipids ratio in large LDL	8.28078	Total.Esterified.Cholesterol / Total.Cholesterol	0.595724	1.13081
6:52621433:T:G	636	932	GSTA2	primary	TRUE	TRUE	TRUE	TRUE	TRUE	TRUE	FALSE	FALSE	.	.	0.354597	rs2749005	6	52621433	G	T	8	rs2749005+rs998584+rs9461755+rs9468937+rs672457+rs622871+rs41272086+rs577721086+rs144607208	31.821	TRUE	logTG	11.9492	TRUE	Total.Triglycerides	13.9567	TRUE	Phospholipids.in.Very.Small.VLDL	2.37948	FALSE	0.26	21.0568	TRUE	Phospholipids to total lipids ratio in medium HDL	26.2734	TRUE	Triglycerides.in.IDL / Phenylalanine	5.1679	TRUE	0.78	17.6901	Phospholipids to total lipids ratio in medium HDL	19.4205	Total.Lipids.in.HDL / Phospholipids.in.HDL	2.00743	7.10009
19:8429323:G:A	637	2272	ANGPTL4	r2 = 1 with rs116843064	FALSE	FALSE	FALSE	FALSE	FALSE	FALSE	FALSE	FALSE	.	not annotated	0.98062	rs116843064	19	8429323	A	G	9	rs116843064+rs7412+rs73015024+rs58542926+rs7255743+rs62116778+rs681343+rs35081008+rs75916629+rs12720359	31.6696	TRUE	nonHDL	2.3478	FALSE	Total.Cholesterol.Minus.HDL.C	134.509	TRUE	Triglycerides.in.Small.VLDL	.	.	.	174.01	TRUE	Triglycerides to total lipids ratio in large HDL	196.068	TRUE	Triglycerides.in.IDL / Triglycerides.in.Very.Small.VLDL	.	.	.	117.806	Free cholesterol to total lipids ratio in medium LDL	136.417	Cholesterol.in.IDL / Remnant.Cholesterol..Non.HDL..Non.LDL..Cholesterol.	132.162	39.5007
11:13361005:T:C	638	1498	ARNTL	primary	TRUE	TRUE	TRUE	TRUE	TRUE	TRUE	TRUE	TRUE	ARNTL	regulates the diurnal rhythms of skeletal muscle metabolism via transcriptional activation of genes promoting triglyceride synthesis (DGAT2)	0.309121	rs1037169	11	13361005	C	T	5	rs1037169+rs964184+rs192489212+rs174562+rs56271783+rs3758669	31.6253	TRUE	logTG	9.56085	TRUE	Total.Triglycerides	14.9239	TRUE	Citrate	2.12238	FALSE	0.29	15.6092	TRUE	Cholesterol to total lipids ratio in small HDL	28.4148	TRUE	Glycoprotein.Acetyls / Citrate	3.75136	FALSE	0.88	14.4931	Cholesterol to total lipids ratio in small HDL	14.4931	Cholesterol.in.Small.HDL / Total.Lipids.in.Small.HDL	5.36301	0.685368
1:234852760:C:T	639	241	RP4-781K5.7	r2 = 0.997 with rs2587534	FALSE	FALSE	FALSE	FALSE	FALSE	FALSE	FALSE	FALSE	.	not annotated	0.482735	rs553427	1	234852760	T	C	10	rs553427+rs10127775+rs3768321+rs646776+rs75460349+rs2642438+rs4847419+rs1689797+rs333947+rs267738+rs10913570	31.585	TRUE	HDL	8.51878	TRUE	HDL.Cholesterol	54.8527	TRUE	Free.Cholesterol.in.Large.LDL	.	.	.	54.8527	TRUE	Free.Cholesterol.in.Large.LDL	61.4928	TRUE	Phospholipids.in.Small.HDL / Total.Cholesterol	.	.	.	36.6728	Free cholesterol to total lipids ratio in small HDL	46.5415	Total.Lipids.in.Large.HDL / Concentration.of.Large.HDL.Particles	46.3339	0
9:2640759:A:G	640	1292	RP11-125B21.2,VLDLR	r2 = 1 with rs3780181	FALSE	FALSE	FALSE	FALSE	FALSE	FALSE	FALSE	FALSE	.	not annotated	0.934791	rs3780181	9	2640759	G	A	5	rs3780181+rs2519093+rs2740488+rs12551960+rs13289095+rs686030	31.5114	TRUE	TC	5.88027	FALSE	Total.Cholesterol	8.03238	FALSE	Cholesteryl.Esters.in.Very.Small.VLDL	.	.	.	8.03238	FALSE	Cholesteryl.Esters.in.Very.Small.VLDL	10.0858	FALSE	Total.Lipids.in.IDL / Albumin	.	.	.	4.21105	Free cholesterol to total lipids ratio in large HDL	5.42844	Triglycerides.in.Small.HDL / Phospholipids.in.VLDL	2.15211	0
8:29024943:G:A	641	1211	KIF13B	r2 = 1 with rs117139027	FALSE	FALSE	FALSE	FALSE	FALSE	FALSE	FALSE	FALSE	.	not annotated	0.982483	rs117139027	8	29024943	A	G	7	rs117139027+rs28601761+rs9987289+rs9297994+rs2737245+rs11787335+rs9298506+rs1495741	31.4271	TRUE	LDL	3.49019	FALSE	Clinical.LDL.Cholesterol	5.40917	FALSE	Cholesteryl.Esters.in.Very.Small.VLDL	.	.	.	6.38892	FALSE	Phospholipids to total lipids ratio in medium VLDL	8.19855	FALSE	Total.Lipids.in.Small.HDL / Phospholipids.in.IDL	.	.	.	6.09637	Phospholipids to total lipids ratio in very large VLDL	6.35795	Phospholipids.in.Very.Large.VLDL / Concentration.of.Very.Large.VLDL.Particles	1.91898	0.979748
11:116623213:TA:T	642	1581	.	duplicate model	FALSE	FALSE	FALSE	FALSE	FALSE	FALSE	FALSE	FALSE	.	not annotated	.	rs398017699	11	116623213	T	TA	.	.	31.3842	TRUE	TC	.	.	.	.	.	.	.	.	.	.	.	.	.	.	.	.	.	.	.	.	.	.	.	.
5:158022724:C:T	643	813	RP11-32D16.1-EBF1	r2 = 0.982 with rs2914231	FALSE	FALSE	FALSE	FALSE	FALSE	FALSE	FALSE	FALSE	.	not annotated	0.770969	rs1650527	5	158022724	T	C	1	rs1650527+rs28650790	31.384	TRUE	HDL	3.71127	FALSE	HDL.Cholesterol	9.05906	FALSE	Triglycerides.in.Very.Large.VLDL	.	.	.	10.5557	TRUE	Cholesteryl esters to total lipids ratio in medium VLDL	12.778	TRUE	Triglycerides.in.Small.LDL / Monounsaturated.Fatty.Acids	.	.	.	7.3926	Free cholesterol to total lipids ratio in large LDL	9.08538	Free.Cholesterol.in.Small.HDL / Total.Concentration.of.Lipoprotein.Particles	5.34779	1.49668
16:83979317:T:C	644	2059	RP11-505K9.4,OSGIN1	r2 = 1 with rs67890964	FALSE	FALSE	FALSE	FALSE	FALSE	FALSE	FALSE	FALSE	.	not annotated	0.627011	rs67890964	16	83979317	C	T	3	rs67890964+rs34042070+rs247616+rs12445804	31.301	TRUE	TC	7.17497	FALSE	Total.Cholesterol	12.0986	TRUE	Cholesterol.in.Very.Small.VLDL	.	.	.	12.0986	TRUE	Cholesterol.in.Very.Small.VLDL	16.9236	TRUE	Free.Cholesterol.in.Very.Small.VLDL / Creatinine	.	.	.	6.67162	Free cholesterol to total lipids ratio in large HDL	6.72177	Triglycerides.in.Small.HDL / Total.Lipids.in.VLDL	4.92365	0
12:120859188:T:G	645	1756	RP1-166H1.2-COX6A1	primary	TRUE	TRUE	FALSE	FALSE	FALSE	FALSE	FALSE	FALSE	.	not annotated	0.717809	rs2516079	12	120859188	G	T	14	rs2516079+rs1169288+rs3184504+rs4883201+rs28866344+rs76895963+rs888192+rs921919+rs111299924+rs75667995+rs10876171+rs35882350+rs10843390+rs75588192+rs11066412	31.3002	TRUE	TC	1.44958	FALSE	Total.Cholesterol	1.87483	FALSE	Docosahexaenoic.Acid	.	.	.	1.87483	FALSE	Docosahexaenoic.Acid	2.79411	FALSE	Creatinine / Docosahexaenoic.Acid	.	.	.	0.601731	Phospholipids to total lipids ratio in large HDL	1.38616	Total.Lipids.in.Large.HDL / Concentration.of.Large.HDL.Particles	0.425242	0
4:74793806:G:A	646	651	CXCL1-HNRNPA1P55	MAF<1%	FALSE	FALSE	FALSE	FALSE	FALSE	FALSE	FALSE	FALSE	.	not annotated	0.999627	rs181372486	4	74793806	A	G	2	rs181372486+rs187918276+rs537526354	31.295	TRUE	LDL	1.31732	FALSE	Clinical.LDL.Cholesterol	1.32793	FALSE	Cholesterol.in.Medium.LDL	.	.	.	1.86744	FALSE	Cholesterol to total lipids ratio in small LDL	2.25319	FALSE	Free.Cholesterol.in.Medium.LDL / Citrate	.	.	.	1.16859	Triglycerides to total lipids ratio in chylomicrons and extremely large VLDL	1.65867	Total.Lipids.in.Large.VLDL / Triglycerides.in.VLDL	0.01061	0.539509
19:2793194:A:C	647	2252	THOP1	r2 = 0.965 with rs1736177	FALSE	FALSE	FALSE	FALSE	FALSE	FALSE	FALSE	FALSE	.	not annotated	0.715543	rs1640269	19	2793194	C	A	10	rs1640269+rs7412+rs73015024+rs58542926+rs7255743+rs516246+rs62116778+rs75916629+rs35081008+rs12720359+rs142385484	31.2441	TRUE	TC	8.24554	TRUE	Total.Cholesterol	10.6782	TRUE	Cholesterol.in.Very.Small.VLDL	.	.	.	10.6782	TRUE	Cholesterol.in.Very.Small.VLDL	15.9431	TRUE	Phospholipids.in.Small.HDL / Phosphoglycerides	.	.	.	8.09332	Free cholesterol to total lipids ratio in small HDL	9.90395	Cholesteryl.Esters.in.Small.HDL / Cholesterol.in.Small.HDL	2.43261	0
11:117204688:G:A	648	1607	CEP164,AP000892.8	lead SNP monomorphic	FALSE	FALSE	FALSE	FALSE	FALSE	FALSE	FALSE	FALSE	.	not annotated	0.999998	rs11216358	11	117204688	A	G	1	rs11216358+rs398017699	31.2248	TRUE	logTG	.	.	.	.	.	.	.	.	.	.	.	.	.	.	.	.	.	.	.	.	.	.	.	.
3:150066540:T:A	649	573	RP11-483E7.1-TSC22D2	r2 = 1 with rs62271373	FALSE	FALSE	FALSE	FALSE	FALSE	FALSE	FALSE	FALSE	.	not annotated	0.943192	rs62271373	3	150066540	A	T	6	rs62271373+rs7634917+rs1154988+rs10049088+rs1516725+rs12485478+rs2240921	31.0119	TRUE	HDL	4.64239	FALSE	HDL.Cholesterol	10.7291	TRUE	Triglycerides.in.Small.HDL	.	.	.	11.0965	TRUE	Cholesteryl esters to total lipids ratio in medium VLDL	14.8685	TRUE	Triglycerides.in.Small.HDL / Glycoprotein.Acetyls	.	.	.	9.85052	Free cholesterol to total lipids ratio in large LDL	12.5462	Cholesteryl.Esters.in.Medium.VLDL / Cholesterol.in.Medium.VLDL	6.08673	0.367345
2:27730940:T:C	650	351	GCKR	r2 = 1 with rs1260326	FALSE	FALSE	FALSE	FALSE	FALSE	FALSE	FALSE	FALSE	.	not annotated	0.392023	rs1260326	2	27730940	C	T	1	rs1260326+rs1712248	30.9626	TRUE	TC	63.1712	TRUE	Total.Cholesterol	330.793	TRUE	Monounsaturated.Fatty.Acids	.	.	.	330.793	TRUE	Monounsaturated.Fatty.Acids	487.027	TRUE	Glutamine / Total.Fatty.Acids	.	.	.	178.797	Free cholesterol to total lipids ratio in large LDL	222.617	Free.Cholesterol.in.Medium.HDL / Cholesteryl.Esters.in.HDL	267.622	0
16:68016185:G:C	651	2006	DPEP3-DPEP2,DPEP3	r2 = 0.735 with rs56374641	FALSE	FALSE	FALSE	FALSE	FALSE	FALSE	FALSE	FALSE	.	not annotated	0.859404	rs255056	16	68016185	C	G	1	rs255056+rs17231506	30.9469	TRUE	HDL	16.8429	TRUE	HDL.Cholesterol	19.4521	TRUE	Cholesteryl.Esters.in.HDL	.	.	.	31.4989	TRUE	Phospholipids to total lipids ratio in medium HDL	38.8598	TRUE	Triglycerides.in.IDL / Total.Fatty.Acids	.	.	.	23.3138	Phospholipids to total lipids ratio in medium HDL	31.6519	Phospholipids.in.IDL / Total.Esterified.Cholesterol	2.60926	12.0467
2:20716422:C:T	652	270	AC012065.4-HS1BP3	r2 = 1 with rs149939015	FALSE	FALSE	FALSE	FALSE	FALSE	FALSE	FALSE	FALSE	.	not annotated	0.999987	rs149939015	2	20716422	T	C	3	rs149939015+rs57825321+rs6547692+rs147821144	30.7932	TRUE	TC	0.137747	FALSE	Total.Cholesterol	1.01069	FALSE	Acetoacetate	.	.	.	1.3917	FALSE	Phospholipids to total lipids ratio in chylomicrons and extremely large VLDL	1.5296	FALSE	Cholesteryl.Esters.in.Large.HDL / Acetoacetate	.	.	.	0.907763	Cholesterol to total lipids ratio in large LDL	1.13339	Cholesteryl.Esters.in.Large.LDL / Total.Lipids.in.LDL	0.872947	0.381007
3:135956305:A:C	653	562	RP11-463H24.1-PCCB	r2 = 0.923 with rs687339	FALSE	FALSE	FALSE	FALSE	FALSE	FALSE	FALSE	FALSE	.	not annotated	0.232229	rs684773	3	135956305	C	A	0	rs684773	30.7477	TRUE	logTG	17.7345	TRUE	Total.Triglycerides	47.5198	TRUE	Phospholipids.in.Very.Small.VLDL	.	.	.	47.5198	TRUE	Phospholipids.in.Very.Small.VLDL	70.2942	TRUE	Total.Lipids.in.Small.HDL / Triglycerides.in.IDL	.	.	.	32.3709	Cholesteryl esters to total lipids ratio in IDL	46.5123	Apolipoprotein.B / Phospholipids.in.LDL	29.7854	0
13:95248566:C:T	654	1820	TGDS,TGDS-GPR180	primary	TRUE	TRUE	FALSE	TRUE	TRUE	TRUE	TRUE	FALSE	.	.	0.695894	rs2298058	13	95248566	T	C	1	rs2298058+rs6602909	30.5935	TRUE	logTG	7.17511	FALSE	Total.Triglycerides	15.6458	TRUE	Free.Cholesterol.in.Chylomicrons.and.Extremely.Large.VLDL	2.5665	FALSE	0.33	19.895	TRUE	Cholesterol to total lipids ratio in small HDL	31.5124	TRUE	Free.Cholesterol.in.Small.VLDL / Cholesteryl.Esters.in.VLDL	4.25887	TRUE	0.89	18.451	Cholesterol to total lipids ratio in small HDL	27.5221	Free.Cholesterol.in.Small.VLDL / Cholesteryl.Esters.in.VLDL	8.47067	4.24925
11:48003392:T:G	655	1519	PTPRJ	primary	TRUE	TRUE	TRUE	TRUE	TRUE	TRUE	TRUE	FALSE	.	.	0.748928	rs7106731	11	48003392	G	T	7	rs7106731+rs964184+rs174564+rs74612335+rs7930518+rs116987336+rs10832954+rs11549407	30.5918	TRUE	TC	11.0165	TRUE	Total.Cholesterol	27.1503	TRUE	HDL.Cholesterol	3.28827	FALSE	0.85	27.1503	TRUE	HDL.Cholesterol	31.3448	TRUE	Cholesteryl.Esters.in.Very.Large.HDL / Cholesterol.in.Very.Large.HDL	3.22688	FALSE	0.89	10.8388	Free cholesterol to total lipids ratio in large VLDL	24.8256	Triglycerides.in.Small.HDL / Monounsaturated.Fatty.Acids	16.1339	0
6:109640321:A:C	656	957	CCDC162P	primary	TRUE	TRUE	TRUE	TRUE	TRUE	TRUE	TRUE	FALSE	.	.	0.656637	rs11759230	6	109640321	C	A	7	rs11759230+rs41272086+rs998584+rs2263329+rs17585887+rs72959041+rs76716928+rs9296406	30.3947	TRUE	HDL	10.9655	TRUE	HDL.Cholesterol	17.0662	TRUE	Cholesterol.in.Large.HDL	3.3711	FALSE	0.56	17.0662	TRUE	Cholesterol.in.Large.HDL	18.6951	TRUE	Cholesteryl.Esters.in.Very.Large.HDL / Degree.of.Unsaturation	4.56759	TRUE	0.38	7.35235	Free cholesterol to total lipids ratio in small HDL	12.2034	Concentration.of.Small.HDL.Particles / Total.Concentration.of.Lipoprotein.Particles	6.10073	0
14:74250126:T:C	657	1860	ELMSAN1,RP5-1021I20.1	primary	TRUE	TRUE	FALSE	TRUE	TRUE	TRUE	TRUE	FALSE	.	.	0.727432	rs13379043	14	74250126	C	T	1	rs13379043+rs2494747	30.3449	TRUE	HDL	3.96815	FALSE	HDL.Cholesterol	13.0544	TRUE	Concentration.of.Very.Small.VLDL.Particles	4.11332	TRUE	0.09	14.2231	TRUE	Inverse Ratio of apolipoprotein B to apolipoprotein A1	20.368	TRUE	Total.Lipids.in.IDL / Total.Concentration.of.Lipoprotein.Particles	6.14088	TRUE	0.1	5.57182	Phospholipids to total lipids ratio in very large VLDL	15.4121	Sphingomyelins / Total.Concentration.of.Lipoprotein.Particles	9.08626	1.16867
7:150540196:C:T	658	1135	AOC1	primary	TRUE	TRUE	FALSE	FALSE	FALSE	FALSE	FALSE	FALSE	.	not annotated	0.671322	rs7794796	7	150540196	T	C	5	rs7794796+rs55747707+rs11762784+rs79949326+rs10242866+rs34409228	30.3063	TRUE	HDL	4.14327	FALSE	HDL.Cholesterol	6.9356	FALSE	Triglycerides.in.Large.VLDL	.	.	.	7.47723	FALSE	Free cholesterol to total lipids ratio in chylomicrons and extremely large VLDL	9.35563	FALSE	Monounsaturated.Fatty.Acids / Total.Triglycerides	.	.	.	3.09345	Free cholesterol to total lipids ratio in large LDL	5.83295	Saturated.Fatty.Acids / Phosphoglycerides	2.79233	0.541631
13:32976656:GC:G	659	1803	.	duplicate model	FALSE	FALSE	FALSE	FALSE	FALSE	FALSE	FALSE	FALSE	.	not annotated	.	rs368213791	13	32976656	G	GC	.	.	30.2691	TRUE	nonHDL	.	.	.	.	.	.	.	.	.	.	.	.	.	.	.	.	.	.	.	.	.	.	.	.
10:124704695:C:T	660	1476	C10orf88	primary	TRUE	TRUE	TRUE	TRUE	TRUE	FALSE	FALSE	FALSE	.	.	0.423796	rs9423289	10	124704695	T	C	1	rs9423289+rs2068888	30.2573	TRUE	nonHDL	12.1922	TRUE	Total.Cholesterol.Minus.HDL.C	15.1805	TRUE	Cholesteryl.Esters.in.Medium.VLDL	2.95934	FALSE	0.1	15.1805	TRUE	Cholesteryl.Esters.in.Medium.VLDL	20.5507	TRUE	Phospholipids.in.IDL / Albumin	4.96568	TRUE	0.19	6.66164	Triglycerides to total lipids ratio in very large VLDL	9.09295	Triglycerides.in.Small.HDL / Phospholipids.in.VLDL	2.98829	0
17:29397852:G:A	661	2115	RP11-848P1.9	r2 = 0.985 with rs2940181	FALSE	FALSE	FALSE	FALSE	FALSE	FALSE	FALSE	FALSE	.	not annotated	0.297993	rs12945088	17	29397852	A	G	6	rs12945088+rs77542162+rs186021206+rs11869730+rs11657987+rs8178824+rs79202680	30.2197	TRUE	TC	10.7645	TRUE	Total.Cholesterol	11.0086	TRUE	Total.Free.Cholesterol	.	.	.	11.0086	TRUE	Total.Free.Cholesterol	12.8837	TRUE	Albumin / Total.Cholesterol	.	.	.	0.524948	Triglycerides to total lipids ratio in large VLDL	2.23925	Albumin / Total.Esterified.Cholesterol	0.2441	0
1:56127473:A:C	662	75	.	duplicate model	FALSE	FALSE	FALSE	FALSE	FALSE	FALSE	FALSE	FALSE	.	not annotated	.	rs148939072	1	56127473	C	A	.	.	30.1543	TRUE	nonHDL	.	.	.	.	.	.	.	.	.	.	.	.	.	.	.	.	.	.	.	.	.	.	.	.
2:165508389:C:T	663	457	COBLL1,GRB14-COBLL1	r2 = 0.943 with rs13389219	FALSE	FALSE	FALSE	FALSE	FALSE	FALSE	FALSE	FALSE	.	not annotated	0.59266	rs10184004	2	165508389	T	C	9	rs10184004+rs934197+rs4299376+rs1260326+rs150474434+rs17050272+rs66491446+rs907866+rs4671050+rs12693968	30.1175	TRUE	nonHDL	10.6859	TRUE	Total.Cholesterol.Minus.HDL.C	50.766	TRUE	Concentration.of.Very.Large.VLDL.Particles	.	.	.	50.766	TRUE	Concentration.of.Very.Large.VLDL.Particles	57.6094	TRUE	Concentration.of.Very.Large.VLDL.Particles / Glycine	.	.	.	28.3641	Cholesterol to total lipids ratio in medium HDL	45.9372	Free.Cholesterol.in.Small.HDL / Total.Concentration.of.Lipoprotein.Particles	40.0801	0
11:18643559:G:A	664	1503	SPTY2D1	r2 = 0.999 with rs10832956	FALSE	FALSE	FALSE	FALSE	FALSE	FALSE	FALSE	FALSE	.	not annotated	0.25693	rs10832954	11	18643559	A	G	4	rs10832954+rs964184+rs112771035+rs174547+rs116987336	30.0825	TRUE	nonHDL	11.9149	TRUE	Total.Cholesterol.Minus.HDL.C	13.8626	TRUE	Concentration.of.Large.LDL.Particles	.	.	.	13.8626	TRUE	Concentration.of.Large.LDL.Particles	19.9374	TRUE	Albumin / Total.Cholesterol	.	.	.	4.99363	Free cholesterol to total lipids ratio in small HDL	7.95978	Albumin / Sphingomyelins	1.94767	0
3:52830764:C:T	665	528	ITIH3,ITIH1	primary	TRUE	TRUE	FALSE	TRUE	TRUE	TRUE	TRUE	FALSE	.	.	0.879305	rs2240921	3	52830764	T	C	5	rs2240921+rs7634917+rs1154988+rs10049088+rs1516725+rs12485478	30.0424	TRUE	HDL	7.00656	FALSE	HDL.Cholesterol	17.4129	TRUE	Triglycerides.in.Large.VLDL	0.695831	FALSE	0.48	17.4129	TRUE	Triglycerides.in.Large.VLDL	20.5133	TRUE	Triglycerides.in.Medium.VLDL / Creatinine	0.691556	FALSE	0.57	8.56446	Phospholipids to total lipids ratio in medium HDL	15.7769	Free.Cholesterol.in.Large.LDL / Clinical.LDL.Cholesterol	10.4063	0
3:12445807:C:A	666	502	PPARG	primary	TRUE	TRUE	TRUE	TRUE	TRUE	FALSE	FALSE	FALSE	PPARG (2)	secondary association with LPmtr gene	0.373643	rs1151996	3	12445807	A	C	0	rs1151996	29.9604	TRUE	nonHDL	14.2755	TRUE	Total.Cholesterol.Minus.HDL.C	16.6465	TRUE	Total.Free.Cholesterol	0.575928	FALSE	0.13	16.6465	TRUE	Total.Free.Cholesterol	21.7115	TRUE	Albumin / Total.Free.Cholesterol	0.769119	FALSE	0.17	4.76018	Free cholesterol to total lipids ratio in small HDL	9.0218	Triglycerides.in.Small.HDL / Total.Lipids.in.VLDL	2.37098	0
15:57297078:A:T	667	1911	TCF12	primary	TRUE	TRUE	FALSE	TRUE	TRUE	FALSE	FALSE	FALSE	.	.	0.927857	rs72749502	15	57297078	T	A	1	rs72749502+rs261342	29.9431	TRUE	nonHDL	7.8904	FALSE	Total.Cholesterol.Minus.HDL.C	10.5299	TRUE	Total.Lipids.in.Medium.VLDL	0.619073	FALSE	0.08	10.5299	TRUE	Total.Lipids.in.Medium.VLDL	12.3758	TRUE	Sphingomyelins / Total.Cholesterol	1.83216	FALSE	0.07	3.1232	Cholesteryl esters to total lipids ratio in medium HDL	6.78195	Sphingomyelins / Total.Cholesterol	2.63955	0
2:43467835:G:A	668	362	THADA	r2 = 0.735 with rs72616903	FALSE	FALSE	FALSE	FALSE	FALSE	FALSE	FALSE	FALSE	.	not annotated	0.840719	rs72613899	2	43467835	A	G	13	rs72613899+rs934197+rs4299376+rs1260326+rs150474434+rs17050272+rs66491446+rs907866+rs4671050+rs12693968+rs10184004+rs78058190+rs6431630+rs140879085	29.8894	TRUE	nonHDL	3.39855	FALSE	Total.Cholesterol.Minus.HDL.C	6.99803	FALSE	Triglycerides.in.Medium.LDL	.	.	.	6.99803	FALSE	Triglycerides.in.Medium.LDL	8.92345	FALSE	Triglycerides.in.Medium.LDL / Glutamine	.	.	.	2.68995	Cholesteryl esters to total lipids ratio in medium HDL	4.07196	Cholesterol.in.Very.Large.HDL / Concentration.of.Very.Large.HDL.Particles	3.59948	0
12:4384844:T:G	669	1644	CCND2-AS2,CCND2,CCND2-AS1	r2 = 1 with rs76895963	FALSE	FALSE	FALSE	FALSE	FALSE	FALSE	FALSE	FALSE	.	not annotated	0.984639	rs76895963	12	4384844	G	T	3	rs76895963+rs1169288+rs11057839+rs12313762	29.8729	TRUE	nonHDL	9.11695	TRUE	Total.Cholesterol.Minus.HDL.C	19.0161	TRUE	Total.Fatty.Acids	.	.	.	19.0161	TRUE	Total.Fatty.Acids	19.6711	TRUE	Triglycerides.in.Medium.LDL / Creatinine	.	.	.	4.80477	Cholesterol to total lipids ratio in large HDL	11.7774	Free.Cholesterol.in.Medium.HDL / Cholesteryl.Esters.in.HDL	9.89915	0
15:58723675:C:T	670	1923	.	duplicate model	FALSE	FALSE	FALSE	FALSE	FALSE	FALSE	FALSE	FALSE	.	not annotated	.	rs1800588	15	58723675	T	C	.	.	29.8666	TRUE	TC	.	.	.	.	.	.	.	.	.	.	.	.	.	.	.	.	.	.	.	.	.	.	.	.
7:100308811:C:G	671	1115	POP7,POP7-EPO	r2 = 0.978 with rs564449	FALSE	FALSE	FALSE	FALSE	FALSE	FALSE	FALSE	FALSE	.	not annotated	0.114777	rs1734911	7	100308811	G	C	4	rs1734911+rs17725246+rs55696093+rs4722551+rs10272002	29.8297	TRUE	TC	8.06627	TRUE	Total.Cholesterol	9.71628	TRUE	Cholesterol.in.IDL	.	.	.	9.71628	TRUE	Cholesterol.in.IDL	13.3957	TRUE	Cholesterol.in.IDL / Glucose	.	.	.	4.10323	Phospholipids to total lipids ratio in chylomicrons and extremely large VLDL	7.64833	Free.Cholesterol.in.Large.VLDL / Cholesterol.in.Very.Large.VLDL	1.65001	0
16:15150505:C:A	672	1964	RRN3,PDXDC1,NTAN1	primary	TRUE	TRUE	TRUE	TRUE	TRUE	TRUE	FALSE	TRUE	PLA2G10	a phospholipase that converts phosphatidylethanolamines and phosphatidylcholines to the corresponding lysolipid and preferentially releases sn-2 bound PUFAs over saturated fatty acids	0.705198	rs12928099	16	15150505	A	C	7	rs12928099+rs183130+rs55781197+rs2925979+rs560117104+rs571298027+rs56094641+rs12924311	29.7696	TRUE	HDL	14.3003	TRUE	HDL.Cholesterol	192.185	TRUE	Degree.of.Unsaturation	32.5579	TRUE	1	192.185	TRUE	Degree.of.Unsaturation	230.494	TRUE	Monounsaturated.Fatty.Acids / Omega.3.Fatty.Acids	33.9653	TRUE	1	95.6031	Ratio of monounsaturated fatty acids to total fatty acids	150.32	Linoleic.Acid / Polyunsaturated.Fatty.Acids	177.884	0
20:43042364:C:T	673	2508	HNF4A	r2 = 1 with rs1800961	FALSE	FALSE	FALSE	FALSE	FALSE	FALSE	FALSE	FALSE	.	not annotated	0.968872	rs1800961	20	43042364	T	C	4	rs1800961+rs1883711+rs2618566+rs6029552+rs45563939	29.7423	TRUE	nonHDL	16.7774	TRUE	Total.Cholesterol.Minus.HDL.C	67.3148	TRUE	Total.Concentration.of.Lipoprotein.Particles	.	.	.	67.3148	TRUE	Total.Concentration.of.Lipoprotein.Particles	70.66	TRUE	Albumin / Total.Concentration.of.Lipoprotein.Particles	.	.	.	35.0301	Phospholipids to total lipids ratio in very small VLDL	49.8183	Cholesteryl.Esters.in.Small.VLDL / Free.Cholesterol.in.Medium.VLDL	50.5374	0
4:75416194:T:C	674	652	AREG-AC142293.3,AC142293.3	MAF<1%	FALSE	FALSE	FALSE	FALSE	FALSE	FALSE	FALSE	FALSE	.	not annotated	0.99985	rs189087436	4	75416194	C	T	6	rs189087436+rs187918276+rs537526354+rs181372486+rs4860987+rs938075289+rs13108218	29.6737	TRUE	LDL	0.242057	FALSE	Clinical.LDL.Cholesterol	1.49605	FALSE	Glycine	.	.	.	1.66039	FALSE	Cholesterol to total lipids ratio in small LDL	2.74677	FALSE	Concentration.of.Medium.LDL.Particles / Concentration.of.Very.Small.VLDL.Particles	.	.	.	1.38814	Cholesterol to total lipids ratio in small LDL	2.1928	Concentration.of.Medium.LDL.Particles / Concentration.of.Very.Small.VLDL.Particles	1.254	0.164333
16:11706100:G:A	675	1960	LITAF	r2 = 1 with rs12445804	FALSE	FALSE	FALSE	FALSE	FALSE	FALSE	FALSE	FALSE	.	not annotated	0.927614	rs12445804	16	11706100	A	G	3	rs12445804+rs34042070+rs247617+rs67890964	29.6478	TRUE	LDL	9.7527	TRUE	Clinical.LDL.Cholesterol	11.1856	TRUE	Cholesterol.in.Medium.VLDL	.	.	.	11.1856	TRUE	Cholesterol.in.Medium.VLDL	12.7022	TRUE	Albumin / Total.Free.Cholesterol	.	.	.	4.2636	Phospholipids to total lipids ratio in large HDL	4.827	Concentration.of.HDL.Particles / Total.Concentration.of.Lipoprotein.Particles	1.43287	0
19:19379549:C:T	676	2344	AC138430.4,TM6SF2	r2 = 1 with rs58542926	FALSE	FALSE	FALSE	FALSE	FALSE	FALSE	FALSE	FALSE	.	not annotated	0.924107	rs58542926	19	19379549	T	C	1	rs58542926+rs1065853	29.6253	TRUE	nonHDL	128.478	TRUE	Total.Cholesterol.Minus.HDL.C	233.976	TRUE	Omega.3.Fatty.Acids	.	.	.	233.976	TRUE	Omega.3.Fatty.Acids	263.298	TRUE	Albumin / Omega.3.Fatty.Acids	.	.	.	25.9031	Cholesteryl esters to total lipids ratio in medium HDL	88.6554	Phospholipids.in.Small.VLDL / Phospholipids.in.Medium.VLDL	105.498	0
2:27730940:T:C	677	347	GCKR	r2 = 1 with rs1260326	FALSE	FALSE	FALSE	FALSE	FALSE	FALSE	FALSE	FALSE	.	not annotated	0.392023	rs1260326	2	27730940	C	T	1	rs1260326+rs138905573	29.5952	TRUE	TC	63.2878	TRUE	Total.Cholesterol	330.877	TRUE	Monounsaturated.Fatty.Acids	.	.	.	330.877	TRUE	Monounsaturated.Fatty.Acids	487.177	TRUE	Glutamine / Total.Fatty.Acids	.	.	.	178.61	Free cholesterol to total lipids ratio in large LDL	222.606	Free.Cholesterol.in.Medium.HDL / Cholesteryl.Esters.in.HDL	267.589	0
17:4692640:G:T	678	2077	VMO1,GLTPD2	r2 = 1 with rs79202680	FALSE	FALSE	FALSE	FALSE	FALSE	FALSE	FALSE	FALSE	.	not annotated	0.995337	rs79202680	17	4692640	T	G	4	rs79202680+rs186021206+rs77542162+rs8072100+rs8178824	29.5918	TRUE	nonHDL	3.34882	FALSE	Total.Cholesterol.Minus.HDL.C	26.2924	TRUE	Triglycerides.in.IDL	.	.	.	26.2924	TRUE	Triglycerides.in.IDL	38.7488	TRUE	Triglycerides.in.Large.LDL / Total.Fatty.Acids	.	.	.	11.2419	Cholesterol to total lipids ratio in IDL	16.0491	Total.Lipids.in.Large.VLDL / Concentration.of.Large.VLDL.Particles	22.9436	0
12:57692470:C:T	679	1699	RP11-123K3.4,R3HDM2	primary	TRUE	TRUE	TRUE	TRUE	TRUE	TRUE	FALSE	FALSE	.	.	0.756648	rs12313762	12	57692470	T	C	2	rs12313762+rs1169288+rs11057839	29.5901	TRUE	nonHDL	10.2312	TRUE	Total.Cholesterol.Minus.HDL.C	27.6086	TRUE	Cholesteryl.Esters.in.Small.VLDL	3.32644	FALSE	0.59	27.6086	TRUE	Cholesteryl.Esters.in.Small.VLDL	34.235	TRUE	Cholesteryl.Esters.in.Small.VLDL / Tyrosine	3.01423	FALSE	0.83	11.4864	Triglycerides to total lipids ratio in medium HDL	24.1378	Free.Cholesterol.in.Small.HDL / Concentration.of.HDL.Particles	17.3774	0
11:116648917:G:C	680	1591	.	duplicate model	FALSE	FALSE	FALSE	FALSE	FALSE	FALSE	FALSE	FALSE	.	not annotated	.	rs964184	11	116648917	C	G	.	.	29.5254	TRUE	nonHDL	.	.	.	.	.	.	.	.	.	.	.	.	.	.	.	.	.	.	.	.	.	.	.	.
15:58731153:G:C	681	1927	RP11-355N15.1,LIPC,ALDH1A2	r2 = 0.911 with rs1077835	FALSE	FALSE	FALSE	FALSE	FALSE	FALSE	FALSE	FALSE	.	not annotated	0.218616	rs261342	15	58731153	C	G	0	rs261342	29.5154	TRUE	nonHDL	67.2509	TRUE	Total.Cholesterol.Minus.HDL.C	1787.92	TRUE	Triglycerides.in.Large.HDL	.	.	.	1787.92	TRUE	Triglycerides.in.Large.HDL	2267.85	TRUE	Free.Cholesterol.in.Small.HDL / Concentration.of.Small.HDL.Particles	.	.	.	1292.52	Free cholesterol to total lipids ratio in small HDL	2147.4	Free.Cholesterol.in.Small.HDL / Concentration.of.Small.HDL.Particles	1720.67	0
12:9082581:A:G	682	1653	PHC1	primary	TRUE	TRUE	FALSE	FALSE	TRUE	FALSE	FALSE	FALSE	.	.	0.898238	rs4883201	12	9082581	G	A	8	rs4883201+rs61941677+rs7133378+rs2338104+rs12366872+rs73119306+rs3184504+rs11045172+rs12369179	29.5045	TRUE	HDL	4.54105	FALSE	HDL.Cholesterol	8.43493	FALSE	Total.Esterified.Cholesterol	.	.	.	8.43493	FALSE	Total.Esterified.Cholesterol	11.462	TRUE	Albumin / Total.Esterified.Cholesterol	0.979032	FALSE	0.05	4.48145	Phospholipids to total lipids ratio in large HDL	6.31206	Triglycerides.in.Small.HDL / Triglycerides.in.Small.LDL	3.89388	0
17:27048296:C:T	683	2107	NEK8,SNORD42A,RAB34,SNORD42B,RPL23A,SNORD4B,TLCD1,SNORD4A,AC010761.8	primary	TRUE	TRUE	FALSE	TRUE	TRUE	FALSE	FALSE	TRUE	TLCD1	inhibits the incorporation of membrane-fluidizing phospholipids containing omega-3 long-chain polyunsaturated fatty acids (LCPUFA) and thereby promotes membrane rigidity.	0.913566	rs7216105	17	27048296	T	C	8	rs7216105+rs77542162+rs186021206+rs11869730+rs11657987+rs8178824+rs79202680+rs12945088+rs2270445	29.5003	TRUE	TC	4.86576	FALSE	Total.Cholesterol	10.4296	TRUE	Phospholipids.in.Small.LDL	0.533584	FALSE	0.09	10.4296	TRUE	Phospholipids.in.Small.LDL	12.9053	TRUE	Phospholipids.in.Small.HDL / Concentration.of.Large.LDL.Particles	0.45173	FALSE	0.1	6.38362	Free cholesterol to total lipids ratio in small HDL	9.68938	Triglycerides.in.Very.Small.VLDL / Triglycerides.in.HDL	5.56384	0
4:26066863:C:T	684	619	SMIM20-RP11-324H7.1	r2 = 0.929 with rs73243877	FALSE	FALSE	FALSE	FALSE	FALSE	FALSE	FALSE	FALSE	.	not annotated	0.837955	rs6448429	4	26066863	T	C	5	rs6448429+rs13108218+rs17605615+rs114816312+rs13107325+rs138307849	29.4609	TRUE	logTG	12.3723	TRUE	Total.Triglycerides	15.1315	TRUE	Cholesteryl.Esters.in.HDL	.	.	.	18.4457	TRUE	Triglycerides to total lipids ratio in small HDL	22.7479	TRUE	Cholesteryl.Esters.in.Medium.HDL / Triglycerides.in.Large.LDL	.	.	.	9.51638	Free cholesterol to total lipids ratio in large LDL	14.9715	Total.Esterified.Cholesterol / Total.Cholesterol	2.75919	3.31424
12:111884608:T:C	685	1745	SH2B3	r2 = 0.992 with rs597808	FALSE	FALSE	FALSE	FALSE	FALSE	FALSE	FALSE	FALSE	.	not annotated	0.48223	rs3184504	12	111884608	C	T	4	rs3184504+rs1169288+rs11057839+rs12313762+rs76895963	29.4584	TRUE	nonHDL	14.2807	TRUE	Total.Cholesterol.Minus.HDL.C	47.0951	TRUE	Lactate	.	.	.	47.0951	TRUE	Lactate	78.0802	TRUE	Lactate / Sphingomyelins	.	.	.	9.29893	Phospholipids to total lipids ratio in small VLDL	30.9851	Lactate / Sphingomyelins	32.8144	0
17:64224775:C:T	686	2163	APOH	r2 = 0.998 with rs1801689	FALSE	FALSE	FALSE	FALSE	FALSE	FALSE	FALSE	FALSE	.	not annotated	0.970391	rs8178824	17	64224775	T	C	3	rs8178824+rs186021206+rs77542162+rs8072100	29.4342	TRUE	nonHDL	10.8171	TRUE	Total.Cholesterol.Minus.HDL.C	62.8531	TRUE	Average.Diameter.for.VLDL.Particles	.	.	.	88.977	TRUE	Cholesteryl esters to total lipids ratio in large VLDL	107.884	TRUE	Triglycerides.in.Large.LDL / Monounsaturated.Fatty.Acids	.	.	.	68.5483	Phospholipids to total lipids ratio in medium VLDL	97.4579	Triglycerides.in.Large.LDL / Monounsaturated.Fatty.Acids	52.0359	26.1239
6:100600097:T:C	687	940	PRDX2P4-RP3-344J20.1	primary	TRUE	TRUE	TRUE	TRUE	TRUE	FALSE	FALSE	FALSE	.	.	0.755997	rs17789218	6	100600097	C	T	7	rs17789218+rs10455872+rs6689+rs78425119+rs2235215+rs80215559+rs998584+rs9402685	29.3747	TRUE	nonHDL	11.3972	TRUE	Total.Cholesterol.Minus.HDL.C	13.5413	TRUE	Concentration.of.Very.Small.VLDL.Particles	0.958163	FALSE	0.17	13.5413	TRUE	Concentration.of.Very.Small.VLDL.Particles	18.4659	TRUE	Total.Lipids.in.Small.VLDL / Valine	1.26755	FALSE	0.41	4.37565	Cholesteryl esters to total lipids ratio in medium HDL	6.83176	Cholesterol.in.Very.Large.HDL / Concentration.of.Very.Large.HDL.Particles	2.14407	0
15:63359564:A:C	688	1934	TPM1,RP11-244F12.2	primary	TRUE	TRUE	FALSE	FALSE	TRUE	FALSE	FALSE	FALSE	.	.	0.432128	rs4619348	15	63359564	C	A	3	rs4619348+rs261290+rs55707100+rs112147665	29.3179	TRUE	HDL	5.376	FALSE	HDL.Cholesterol	9.13706	FALSE	Creatinine	.	.	.	9.3617	FALSE	Phospholipids to total lipids ratio in very small VLDL	17.6204	TRUE	Cholesteryl.Esters.in.Small.HDL / Creatinine	3.07123	FALSE	0.52	8.00783	Cholesterol to total lipids ratio in IDL	9.94779	Phospholipids.in.Large.LDL / Apolipoprotein.B	3.76106	0.224645
16:69686912:A:G	689	2015	NFAT5	primary	TRUE	TRUE	TRUE	TRUE	TRUE	TRUE	FALSE	FALSE	.	.	0.40964	rs6499240	16	69686912	G	A	4	rs6499240+rs17231506+rs2925979+rs12928099+rs12445401	29.2815	TRUE	logTG	10.1439	TRUE	Total.Triglycerides	11.3483	TRUE	Triglycerides.in.Small.VLDL	2.64058	FALSE	0.06	12.059	TRUE	Cholesteryl esters to total lipids ratio in very small VLDL	14.9742	TRUE	Triglycerides.in.Small.VLDL / Glycoprotein.Acetyls	3.88428	FALSE	0.05	10.0459	Free cholesterol to total lipids ratio in large LDL	12.1115	Cholesteryl.Esters.in.Very.Small.VLDL / Cholesterol.in.Very.Small.VLDL	1.20437	0.71074
11:5248004:G:A	690	1489	CoTC_ribozyme,HBB	MAF<1%	FALSE	FALSE	FALSE	FALSE	FALSE	FALSE	FALSE	FALSE	.	not annotated	0.999957	rs11549407	11	5248004	A	G	6	rs11549407+rs964184+rs174564+rs74612335+rs7930518+rs116987336+rs10832954	29.2255	TRUE	TC	0.636071	FALSE	Total.Cholesterol	2.17424	FALSE	Phospholipids.in.HDL	.	.	.	2.17424	FALSE	Phospholipids.in.HDL	3.28573	FALSE	Histidine / Phospholipids.in.HDL	.	.	.	1.09628	Phospholipids to total lipids ratio in very small VLDL	1.93671	Concentration.of.LDL.Particles / Total.Cholesterol.Minus.HDL.C	1.53817	0
2:203302627:G:A	691	469	BMPR2	r2 = 1 with rs12693968	FALSE	FALSE	FALSE	FALSE	FALSE	FALSE	FALSE	FALSE	.	not annotated	0.744502	rs12693968	2	203302627	A	G	8	rs12693968+rs934197+rs4299376+rs1260326+rs150474434+rs17050272+rs66491446+rs907866+rs4671050	29.1778	TRUE	nonHDL	12.8442	TRUE	Total.Cholesterol.Minus.HDL.C	16.1657	TRUE	Phospholipids.in.Small.LDL	.	.	.	16.1657	TRUE	Phospholipids.in.Small.LDL	17.8289	TRUE	Total.Lipids.in.Small.LDL / Tyrosine	.	.	.	4.07296	Phospholipids to total lipids ratio in small HDL	6.0428	Tyrosine / Monounsaturated.Fatty.Acids	3.32154	0
6:32046275:A:C	692	880	TNXB,RNA5SP206	primary	TRUE	TRUE	FALSE	FALSE	FALSE	FALSE	FALSE	FALSE	.	not annotated	0.940468	rs7774197	6	32046275	C	A	11	rs7774197+rs10455872+rs2235215+rs1800562+rs6689+rs2297359+rs9399137+rs148349043+rs9496567+rs35657082+rs1265097+rs1556857	29.1752	TRUE	LDL	0.268317	FALSE	Clinical.LDL.Cholesterol	2.52076	FALSE	Albumin	.	.	.	4.35826	FALSE	Ratio of saturated fatty acids to total fatty acids	4.35934	FALSE	Triglycerides.in.Small.HDL / Monounsaturated.Fatty.Acids	.	.	.	3.48256	Ratio of saturated fatty acids to total fatty acids	3.48256	Saturated.Fatty.Acids / Total.Fatty.Acids	2.25244	1.8375
15:63791063:T:C	693	1938	AC007950.1-USP3	r2 = 0.716 with rs11636087	FALSE	FALSE	FALSE	FALSE	FALSE	FALSE	FALSE	FALSE	.	not annotated	0.657318	rs62011285	15	63791063	C	T	2	rs62011285+rs1077834+rs72749502	29.1752	TRUE	TC	1.33887	FALSE	Total.Cholesterol	17.2548	TRUE	Triglycerides.in.Small.LDL	.	.	.	17.2548	TRUE	Triglycerides.in.Small.LDL	25.1311	TRUE	Triglycerides.in.Medium.LDL / Triglycerides.in.Large.LDL	.	.	.	10.7358	Free cholesterol to total lipids ratio in large LDL	17.7899	Phospholipids.in.Large.LDL / Total.Lipids.in.LDL	15.916	0
20:44534651:G:A	694	2514	PLTP	r2 = 0.715 with rs4810479	FALSE	FALSE	FALSE	FALSE	FALSE	FALSE	FALSE	FALSE	.	not annotated	0.785331	rs6065904	20	44534651	A	G	5	rs6065904+rs1883711+rs2618566+rs6029552+rs45563939+rs1800961	29.1618	TRUE	nonHDL	8.6004	TRUE	Total.Cholesterol.Minus.HDL.C	860.433	TRUE	Phospholipids.in.Very.Large.HDL	.	.	.	860.433	TRUE	Phospholipids.in.Very.Large.HDL	1036.74	TRUE	Cholesteryl.Esters.in.Medium.HDL / Phospholipids.in.Very.Large.HDL	.	.	.	292.131	Free cholesterol to total lipids ratio in large HDL	780.923	Free.Cholesterol.in.Small.HDL / Total.Cholines	851.832	0
1:55509585:C:T	695	69	PCSK9	lead SNP monomorphic	FALSE	FALSE	FALSE	FALSE	FALSE	FALSE	FALSE	FALSE	.	not annotated	1	rs151193009	1	55509585	T	C	1	rs151193009+rs611917	29.1605	TRUE	nonHDL	.	.	.	.	.	.	.	.	.	.	.	.	.	.	.	.	.	.	.	.	.	.	.	.
[truncated: 1,929 more rows]
[truncated: 77 more columns]

## Sheet: ST4
ihclust	iNMR	name	MergedSubgroup	NatMed Abbreviation	LP type	LP	LP content	LP size	MyGroup	221:chr1:rs2642438:MARC1:-log10p=37.67	1139:chr8:rs2936512:AGPAT5,MIR4659B:-log10p=10.68	442:chr2:rs1375131:ZRANB3:-log10p=12.51	443:chr2:rs3739020:MCM6:-log10p=12.69	500:chr3:rs12633551:PPARG:-log10p=16.01	1018:chr6:rs1800769:RP1-81D8.4,LPA:-log10p=21.03	2329:chr19:rs4808766:PDE4C,AC068499.10:-log10p=12.69	741:chr5:rs3010275:CTC-347C20.1:-log10p=10.99	2479:chr20:rs3746337:AL035252.1-PYGB,ENTPD6,AL035252.1:-log10p=17.57	584:chr3:rs6441313:IFT80,RP11-432B6.3:-log10p=35.68	1865:chr14:rs2058919:YLPM1,RP11-316E14.6:-log10p=14.58	1863:chr14:rs8021280:YLPM1:-log10p=14.97	859:chr6:rs2517671:HLA-W-MICD,MICD,HCG9:-log10p=16.73	2539:chr20:rs3746778:NTSR1:-log10p=9.67	1161:chr8:rs17149279:RP11-115J16.1:-log10p=28.53	777:chr5:rs6894249:C5orf56:-log10p=10.65	778:chr5:rs2057655:AC116366.6,C5orf56,Y_RNA:-log10p=16.47	1491:chr11:rs11601507:TRIM5:-log10p=25.45	142:chr1:rs111232683:RP11-233E12.1-PRMT6:-log10p=12.01	2176:chr17:rs77542162:ABCA6:-log10p=118.57	2600:chr22:rs138352:XPNPEP3:-log10p=11.14	2471:chr20:rs438568:RP5-1069C8.2-SPTLC3:-log10p=13.01	759:chr5:rs2307111:RNU6-680P,POC5:-log10p=64.28	1369:chr9:rs13289095:PKN3:-log10p=13.52	612:chr4:rs4234798:SORCS2:-log10p=9.98	1859:chr14:rs7149261:SYNJ2BP-COX16,SYNJ2BP:-log10p=10.97	2475:chr20:rs2618566:AL035045.1-RP5-905G11.3:-log10p=35.66	274:chr2:rs12992267:AC012361.1-RP11-116D2.1:-log10p=98.73	2403:chr19:rs1065853:APOE-APOC1,APOC1,APOE:-log10p=4443.83	723:chr5:rs116734477:ITGA1,PELO:-log10p=27.45	844:chr6:rs1800562:HFE:-log10p=41.85	1636:chr11:rs78689694:ST3GAL4:-log10p=36.82	2267:chr19:rs571497:CLEC4M,RPL21P129-CLEC4M:-log10p=10.45	629:chr4:rs13121671:RP11-1267H10.3,RP11-1267H10.1-RP11-1267H10.3:-log10p=18.57	632:chr4:rs34707604:RP11-1267H10.3,RP11-1267H10.1-RP11-1267H10.3:-log10p=34.18	627:chr4:rs9884390:UGT2B29P,TMPRSS11E-UGT2B29P:-log10p=33.58	2251:chr19:rs1736177:THOP1:-log10p=10.78	961:chr6:rs1338668:FRK-NT5DC1:-log10p=19.46	834:chr6:rs9368188:E2F3:-log10p=10.68	120:chr1:rs4655772:LEPR-RN7SL854P:-log10p=15.56
[truncated: 168 more rows]
[truncated: 406 more columns]

[truncated: 11 more sheets: ST5, ST6, ST7, ST8, ST9, ST10, ST11, ST12, ST13, ST14, ST15]
